# Supplementary material for: Design considerations for enhancing absorption in semiconductors on metals through surface plasmon polaritons
Source: Royal Society of Chemistry journal article supplement (doi:10.1039/c4cp00017j), 2014-01-01
Supplement: c4cp00017j1.pdf [file c4cp00017j1.pdf]

SUMMARY OF OPTICAL CONSTANTS

| nm  | THz    | eV     | Ag     |        | cSi    |        | Fe2O3  |        | GaAs   |        | TiO2   |        | P3HT:PCBM |        | CdTe   |        | aSi    |        | SiO2   |   |
|-----|--------|--------|--------|--------|--------|--------|--------|--------|--------|--------|--------|--------|-----------|--------|--------|--------|--------|--------|--------|---|
|     |        |        | n      | k      | n      | k      | n      | k      | n      | k      | n      | k      | n         | k      | n      | k      | n      | k      | n      | k |
| 200 | 1499   | 6.1992 | 1.1921 | 1.1811 | 0.7650 | 2.7961 | 1.5583 | 0.9665 | 0.7645 | 2.0907 | 1.7515 | 0.8747 | 1.4986    | 0.6812 | 0.6960 | 1.6352 | 0.9753 | 2.4237 | 1.5533 | 0 |
| 201 | 1491.5 | 6.1684 | 1.1961 | 1.1891 | 0.7860 | 2.8202 | 1.5627 | 0.9700 | 0.7703 | 2.1223 | 1.7484 | 0.8887 | 1.5063    | 0.6809 | 0.7068 | 1.6598 | 0.9872 | 2.4421 | 1.5520 | 0 |
| 202 | 1484.1 | 6.1378 | 1.2002 | 1.1970 | 0.8075 | 2.8439 | 1.5672 | 0.9735 | 0.7765 | 2.1543 | 1.7457 | 0.9030 | 1.5140    | 0.6803 | 0.7180 | 1.6844 | 0.9992 | 2.4605 | 1.5506 | 0 |
| 203 | 1476.8 | 6.1076 | 1.2044 | 1.2048 | 0.8294 | 2.8671 | 1.5716 | 0.9769 | 0.7832 | 2.1867 | 1.7434 | 0.9174 | 1.5217    | 0.6796 | 0.7296 | 1.7092 | 1.0114 | 2.4789 | 1.5492 | 0 |
| 204 | 1469.6 | 6.0777 | 1.2088 | 1.2125 | 0.8518 | 2.8899 | 1.5761 | 0.9804 | 0.7905 | 2.2196 | 1.7416 | 0.9321 | 1.5294    | 0.6786 | 0.7416 | 1.7341 | 1.0238 | 2.4973 | 1.5479 | 0 |
| 205 | 1462.4 | 6.0480 | 1.2133 | 1.2201 | 0.8745 | 2.9121 | 1.5806 | 0.9838 | 0.7983 | 2.2528 | 1.7401 | 0.9469 | 1.5370    | 0.6775 | 0.7540 | 1.7592 | 1.0363 | 2.5157 | 1.5467 | 0 |
| 206 | 1455.3 | 6.0187 | 1.2179 | 1.2276 | 0.8975 | 2.9338 | 1.5852 | 0.9872 | 0.8066 | 2.2866 | 1.7391 | 0.9620 | 1.5446    | 0.6763 | 0.7668 | 1.7844 | 1.0490 | 2.5340 | 1.5454 | 0 |
| 207 | 1448.3 | 5.9896 | 1.2226 | 1.2350 | 0.9209 | 2.9549 | 1.5897 | 0.9907 | 0.8156 | 2.3207 | 1.7386 | 0.9772 | 1.5521    | 0.6748 | 0.7801 | 1.8098 | 1.0618 | 2.5523 | 1.5442 | 0 |
| 208 | 1441.3 | 5.9608 | 1.2275 | 1.2423 | 0.9445 | 2.9755 | 1.5943 | 0.9941 | 0.8251 | 2.3553 | 1.7385 | 0.9926 | 1.5595    | 0.6732 | 0.7939 | 1.8354 | 1.0748 | 2.5706 | 1.5430 | 0 |
| 209 | 1434.4 | 5.9323 | 1.2324 | 1.2496 | 0.9684 | 2.9954 | 1.5989 | 0.9975 | 0.8353 | 2.3903 | 1.7388 | 1.0082 | 1.5669    | 0.6714 | 0.8081 | 1.8612 | 1.0880 | 2.5888 | 1.5418 | 0 |
| 210 | 1427.6 | 5.9040 | 1.2375 | 1.2567 | 0.9925 | 3.0146 | 1.6035 | 1.0009 | 0.8462 | 2.4258 | 1.7396 | 1.0239 | 1.5743    | 0.6694 | 0.8229 | 1.8872 | 1.1013 | 2.6070 | 1.5406 | 0 |
| 211 | 1420.8 | 5.8760 | 1.2427 | 1.2637 | 1.0168 | 3.0332 | 1.6082 | 1.0042 | 0.8579 | 2.4618 | 1.7409 | 1.0398 | 1.5815    | 0.6673 | 0.8382 | 1.9134 | 1.1148 | 2.6252 | 1.5395 | 0 |
| 212 | 1414.1 | 5.8483 | 1.2481 | 1.2705 | 1.0412 | 3.0511 | 1.6129 | 1.0076 | 0.8702 | 2.4983 | 1.7426 | 1.0558 | 1.5887    | 0.6650 | 0.8541 | 1.9399 | 1.1285 | 2.6434 | 1.5384 | 0 |
| 213 | 1407.5 | 5.8209 | 1.2535 | 1.2773 | 1.0656 | 3.0683 | 1.6176 | 1.0110 | 0.8834 | 2.5352 | 1.7448 | 1.0719 | 1.5958    | 0.6625 | 0.8705 | 1.9667 | 1.1423 | 2.6616 | 1.5373 | 0 |
| 214 | 1400.9 | 5.7937 | 1.2591 | 1.2839 | 1.0901 | 3.0848 | 1.6223 | 1.0143 | 0.8974 | 2.5726 | 1.7475 | 1.0882 | 1.6027    | 0.6599 | 0.8876 | 1.9938 | 1.1563 | 2.6797 | 1.5362 | 0 |
| 215 | 1394.4 | 5.7667 | 1.2647 | 1.2904 | 1.1145 | 3.1005 | 1.6270 | 1.0177 | 0.9122 | 2.6104 | 1.7507 | 1.1046 | 1.6096    | 0.6571 | 0.9054 | 2.0212 | 1.1705 | 2.6977 | 1.5351 | 0 |
| 216 | 1387.9 | 5.7400 | 1.2705 | 1.2968 | 1.1388 | 3.1156 | 1.6318 | 1.0210 | 0.9280 | 2.6487 | 1.7544 | 1.1210 | 1.6164    | 0.6542 | 0.9239 | 2.0490 | 1.1849 | 2.7158 | 1.5341 | 0 |
| 217 | 1381.5 | 5.7136 | 1.2764 | 1.3030 | 1.1629 | 3.1299 | 1.6366 | 1.0243 | 0.9448 | 2.6875 | 1.7585 | 1.1376 | 1.6231    | 0.6512 | 0.9432 | 2.0772 | 1.1995 | 2.7338 | 1.5331 | 0 |
| 218 | 1375.2 | 5.6873 | 1.2824 | 1.3091 | 1.1867 | 3.1434 | 1.6415 | 1.0276 | 0.9626 | 2.7268 | 1.7632 | 1.1543 | 1.6297    | 0.6480 | 0.9633 | 2.1058 | 1.2142 | 2.7518 | 1.5321 | 0 |
| 219 | 1368.9 | 5.6614 | 1.2886 | 1.3150 | 1.2103 | 3.1563 | 1.6463 | 1.0309 | 0.9815 | 2.7665 | 1.7684 | 1.1710 | 1.6361    | 0.6446 | 0.9844 | 2.1348 | 1.2292 | 2.7697 | 1.5311 | 0 |
| 220 | 1362.7 | 5.6356 | 1.2948 | 1.3208 | 1.2334 | 3.1686 | 1.6512 | 1.0342 | 1.0015 | 2.8067 | 1.7741 | 1.1878 | 1.6425    | 0.6412 | 1.0065 | 2.1644 | 1.2443 | 2.7876 | 1.5301 | 0 |
| 221 | 1356.5 | 5.6101 | 1.3011 | 1.3264 | 1.2561 | 3.1801 | 1.6561 | 1.0374 | 1.0227 | 2.8472 | 1.7803 | 1.2046 | 1.6487    | 0.6376 | 1.0297 | 2.1945 | 1.2596 | 2.8055 | 1.5292 | 0 |
| 222 | 1350.4 | 5.5849 | 1.3076 | 1.3318 | 1.2783 | 3.1911 | 1.6611 | 1.0407 | 1.0452 | 2.8883 | 1.7871 | 1.2215 | 1.6547    | 0.6339 | 1.0541 | 2.2251 | 1.2751 | 2.8233 | 1.5283 | 0 |
| 223 | 1344.4 | 5.5598 | 1.3141 | 1.3371 | 1.2999 | 3.2015 | 1.6661 | 1.0439 | 1.0690 | 2.9296 | 1.7943 | 1.2384 | 1.6607    | 0.6301 | 1.0800 | 2.2563 | 1.2908 | 2.8411 | 1.5274 | 0 |
| 224 | 1338.4 | 5.5350 | 1.3208 | 1.3422 | 1.3208 | 3.2114 | 1.6711 | 1.0472 | 1.0943 | 2.9714 | 1.8022 | 1.2553 | 1.6665    | 0.6262 | 1.1075 | 2.2881 | 1.3067 | 2.8588 | 1.5265 | 0 |
| 225 | 1332.4 | 5.5104 | 1.3275 | 1.3471 | 1.3410 | 3.2209 | 1.6761 | 1.0504 | 1.1210 | 3.0135 | 1.8105 | 1.2722 | 1.6722    | 0.6222 | 1.1368 | 2.3206 | 1.3228 | 2.8765 | 1.5256 | 0 |
| 226 | 1326.5 | 5.4860 | 1.3344 | 1.3518 | 1.3604 | 3.2299 | 1.6811 | 1.0536 | 1.1493 | 3.0559 | 1.8194 | 1.2891 | 1.6777    | 0.6180 | 1.1681 | 2.3537 | 1.3391 | 2.8942 | 1.5247 | 0 |
| 227 | 1320.7 | 5.4619 | 1.3413 | 1.3564 | 1.3790 | 3.2387 | 1.6862 | 1.0568 | 1.1793 | 3.0985 | 1.8289 | 1.3059 | 1.6831    | 0.6138 | 1.2017 | 2.3873 | 1.3556 | 2.9118 | 1.5239 | 0 |
| 228 | 1314.9 | 5.4379 | 1.3484 | 1.3607 | 1.3967 | 3.2472 | 1.6913 | 1.0600 | 1.2109 | 3.1414 | 1.8389 | 1.3228 | 1.6884    | 0.6095 | 1.2381 | 2.4215 | 1.3723 | 2.9293 | 1.5230 | 0 |
| 229 | 1309.1 | 5.4142 | 1.3555 | 1.3649 | 1.4134 | 3.2556 | 1.6965 | 1.0631 | 1.2445 | 3.1843 | 1.8495 | 1.3396 | 1.6935    | 0.6052 | 1.2775 | 2.4561 | 1.3892 | 2.9468 | 1.5222 | 0 |
| 230 | 1303.5 | 5.3906 | 1.3627 | 1.3688 | 1.4292 | 3.2640 | 1.7017 | 1.0663 | 1.2799 | 3.2274 | 1.8607 | 1.3563 | 1.6984    | 0.6007 | 1.3204 | 2.4909 | 1.4063 | 2.9642 | 1.5214 | 0 |
| 231 | 1297.8 | 5.3673 | 1.3699 | 1.3725 | 1.4440 | 3.2724 | 1.7069 | 1.0694 | 1.3173 | 3.2704 | 1.8724 | 1.3729 | 1.7033    | 0.5962 | 1.3674 | 2.5255 | 1.4237 | 2.9816 | 1.5206 | 0 |

| nm  | THz    | eV     | Ag     |        | cSi    |        | Fe2O3  |        | GaAs   |        | TiO2   |        | P3HT:PCBM |        | CdTe   |        | aSi    |        | SiO2   |   |
|-----|--------|--------|--------|--------|--------|--------|--------|--------|--------|--------|--------|--------|-----------|--------|--------|--------|--------|--------|--------|---|
|     |        |        | n      | k      | n      | k      | n      | k      | n      | k      | n      | k      | n         | k      | n      | k      | n      | k      | n      | k |
| 232 | 1292.2 | 5.3441 | 1.3773 | 1.3760 | 1.4578 | 3.2809 | 1.7121 | 1.0725 | 1.3569 | 3.3133 | 1.8848 | 1.3895 | 1.7079    | 0.5916 | 1.4189 | 2.5595 | 1.4413 | 2.9989 | 1.5198 | 0 |
| 233 | 1286.7 | 5.3212 | 1.3847 | 1.3793 | 1.4705 | 3.2898 | 1.7174 | 1.0757 | 1.3986 | 3.3560 | 1.8977 | 1.4059 | 1.7125    | 0.5870 | 1.4756 | 2.5923 | 1.4591 | 3.0162 | 1.5191 | 0 |
| 234 | 1281.2 | 5.2985 | 1.3922 | 1.3823 | 1.4822 | 3.2990 | 1.7227 | 1.0787 | 1.4426 | 3.3983 | 1.9112 | 1.4222 | 1.7168    | 0.5823 | 1.5378 | 2.6229 | 1.4771 | 3.0333 | 1.5183 | 0 |
| 235 | 1275.7 | 5.2759 | 1.3998 | 1.3852 | 1.4928 | 3.3087 | 1.7280 | 1.0818 | 1.4890 | 3.4402 | 1.9253 | 1.4384 | 1.7211    | 0.5776 | 1.6062 | 2.6502 | 1.4953 | 3.0504 | 1.5176 | 0 |
| 236 | 1270.3 | 5.2536 | 1.4074 | 1.3877 | 1.5024 | 3.3190 | 1.7334 | 1.0849 | 1.5379 | 3.4814 | 1.9400 | 1.4544 | 1.7252    | 0.5728 | 1.6807 | 2.6727 | 1.5138 | 3.0675 | 1.5169 | 0 |
| 237 | 1265   | 5.2314 | 1.4150 | 1.3901 | 1.5110 | 3.3301 | 1.7388 | 1.0879 | 1.5893 | 3.5219 | 1.9553 | 1.4702 | 1.7291    | 0.5680 | 1.7613 | 2.6887 | 1.5324 | 3.0844 | 1.5161 | 0 |
| 238 | 1259.6 | 5.2094 | 1.4227 | 1.3922 | 1.5186 | 3.3421 | 1.7442 | 1.0909 | 1.6434 | 3.5613 | 1.9712 | 1.4859 | 1.7329    | 0.5631 | 1.8471 | 2.6962 | 1.5514 | 3.1013 | 1.5154 | 0 |
| 239 | 1254.4 | 5.1876 | 1.4305 | 1.3940 | 1.5253 | 3.3550 | 1.7497 | 1.0939 | 1.7001 | 3.5996 | 1.9877 | 1.5013 | 1.7365    | 0.5583 | 1.9367 | 2.6932 | 1.5705 | 3.1181 | 1.5147 | 0 |
| 240 | 1249.1 | 5.1660 | 1.4383 | 1.3956 | 1.5311 | 3.3691 | 1.7551 | 1.0969 | 1.7595 | 3.6365 | 2.0049 | 1.5165 | 1.7400    | 0.5534 | 2.0279 | 2.6783 | 1.5899 | 3.1348 | 1.5141 | 0 |
| 241 | 1244   | 5.1446 | 1.4461 | 1.3969 | 1.5361 | 3.3844 | 1.7607 | 1.0999 | 1.8217 | 3.6717 | 2.0226 | 1.5314 | 1.7434    | 0.5484 | 2.1176 | 2.6503 | 1.6096 | 3.1514 | 1.5134 | 0 |
| 242 | 1238.8 | 5.1233 | 1.4539 | 1.3979 | 1.5404 | 3.4011 | 1.7662 | 1.1028 | 1.8866 | 3.7050 | 2.0410 | 1.5461 | 1.7466    | 0.5435 | 2.2025 | 2.6096 | 1.6294 | 3.1680 | 1.5127 | 0 |
| 243 | 1233.7 | 5.1022 | 1.4617 | 1.3987 | 1.5440 | 3.4192 | 1.7718 | 1.1058 | 1.9542 | 3.7361 | 2.0601 | 1.5605 | 1.7497    | 0.5386 | 2.2792 | 2.5574 | 1.6496 | 3.1844 | 1.5121 | 0 |
| 244 | 1228.7 | 5.0813 | 1.4696 | 1.3992 | 1.5470 | 3.4390 | 1.7775 | 1.1087 | 2.0246 | 3.7647 | 2.0797 | 1.5745 | 1.7526    | 0.5336 | 2.3450 | 2.4962 | 1.6699 | 3.2007 | 1.5114 | 0 |
| 245 | 1223.6 | 5.0606 | 1.4774 | 1.3994 | 1.5496 | 3.4604 | 1.7831 | 1.1116 | 2.0975 | 3.7905 | 2.1000 | 1.5882 | 1.7554    | 0.5287 | 2.3985 | 2.4294 | 1.6906 | 3.2169 | 1.5108 | 0 |
| 246 | 1218.7 | 5.0400 | 1.4852 | 1.3994 | 1.5519 | 3.4837 | 1.7888 | 1.1144 | 2.1729 | 3.8133 | 2.1210 | 1.6015 | 1.7581    | 0.5237 | 2.4391 | 2.3604 | 1.7115 | 3.2330 | 1.5102 | 0 |
| 247 | 1213.7 | 5.0196 | 1.4931 | 1.3990 | 1.5539 | 3.5089 | 1.7946 | 1.1173 | 2.2506 | 3.8326 | 2.1425 | 1.6145 | 1.7606    | 0.5188 | 2.4677 | 2.2923 | 1.7326 | 3.2490 | 1.5096 | 0 |
| 248 | 1208.8 | 4.9994 | 1.5009 | 1.3984 | 1.5560 | 3.5361 | 1.8003 | 1.1201 | 2.3304 | 3.8482 | 2.1647 | 1.6270 | 1.7630    | 0.5139 | 2.4858 | 2.2275 | 1.7540 | 3.2649 | 1.5090 | 0 |
| 249 | 1204   | 4.9793 | 1.5086 | 1.3975 | 1.5581 | 3.5654 | 1.8061 | 1.1229 | 2.4121 | 3.8598 | 2.1876 | 1.6390 | 1.7653    | 0.5090 | 2.4956 | 2.1677 | 1.7756 | 3.2806 | 1.5084 | 0 |
| 250 | 1199.2 | 4.9594 | 1.5163 | 1.3962 | 1.5605 | 3.5969 | 1.8120 | 1.1257 | 2.4953 | 3.8671 | 2.2110 | 1.6506 | 1.7674    | 0.5041 | 2.4988 | 2.1137 | 1.7975 | 3.2962 | 1.5078 | 0 |
| 251 | 1194.4 | 4.9396 | 1.5240 | 1.3947 | 1.5633 | 3.6307 | 1.8178 | 1.1285 | 2.5796 | 3.8699 | 2.2351 | 1.6616 | 1.7694    | 0.4992 | 2.4976 | 2.0657 | 1.8197 | 3.3117 | 1.5072 | 0 |
| 252 | 1189.7 | 4.9200 | 1.5316 | 1.3929 | 1.5668 | 3.6668 | 1.8237 | 1.1312 | 2.6648 | 3.8679 | 2.2599 | 1.6721 | 1.7713    | 0.4944 | 2.4934 | 2.0236 | 1.8422 | 3.3270 | 1.5066 | 0 |
| 253 | 1185   | 4.9006 | 1.5392 | 1.3908 | 1.5710 | 3.7053 | 1.8297 | 1.1339 | 2.7503 | 3.8610 | 2.2852 | 1.6821 | 1.7731    | 0.4895 | 2.4874 | 1.9868 | 1.8649 | 3.3422 | 1.5061 | 0 |
| 254 | 1180.3 | 4.8813 | 1.5467 | 1.3884 | 1.5764 | 3.7462 | 1.8357 | 1.1366 | 2.8357 | 3.8491 | 2.3111 | 1.6914 | 1.7748    | 0.4847 | 2.4806 | 1.9547 | 1.8879 | 3.3572 | 1.5055 | 0 |
| 255 | 1175.7 | 4.8621 | 1.5541 | 1.3857 | 1.5829 | 3.7896 | 1.8417 | 1.1392 | 2.9206 | 3.8321 | 2.3377 | 1.7000 | 1.7763    | 0.4800 | 2.4737 | 1.9267 | 1.9111 | 3.3721 | 1.5050 | 0 |
| 256 | 1171.1 | 4.8431 | 1.5614 | 1.3827 | 1.5910 | 3.8354 | 1.8478 | 1.1419 | 3.0043 | 3.8100 | 2.3648 | 1.7080 | 1.7777    | 0.4752 | 2.4672 | 1.9022 | 1.9347 | 3.3868 | 1.5044 | 0 |
| 257 | 1166.5 | 4.8243 | 1.5686 | 1.3794 | 1.6008 | 3.8838 | 1.8539 | 1.1445 | 3.0864 | 3.7830 | 2.3925 | 1.7153 | 1.7791    | 0.4705 | 2.4612 | 1.8807 | 1.9585 | 3.4013 | 1.5039 | 0 |
| 258 | 1162   | 4.8056 | 1.5758 | 1.3759 | 1.6126 | 3.9346 | 1.8600 | 1.1471 | 3.1665 | 3.7511 | 2.4208 | 1.7218 | 1.7803    | 0.4658 | 2.4559 | 1.8615 | 1.9825 | 3.4157 | 1.5034 | 0 |
| 259 | 1157.5 | 4.7870 | 1.5828 | 1.3720 | 1.6267 | 3.9878 | 1.8662 | 1.1496 | 3.2439 | 3.7146 | 2.4495 | 1.7275 | 1.7814    | 0.4612 | 2.4514 | 1.8443 | 2.0069 | 3.4298 | 1.5029 | 0 |
| 260 | 1153.1 | 4.7686 | 1.5896 | 1.3678 | 1.6433 | 4.0434 | 1.8724 | 1.1521 | 3.3184 | 3.6738 | 2.4788 | 1.7324 | 1.7824    | 0.4566 | 2.4478 | 1.8287 | 2.0315 | 3.4438 | 1.5024 | 0 |
| 261 | 1148.6 | 4.7504 | 1.5964 | 1.3633 | 1.6628 | 4.1014 | 1.8786 | 1.1546 | 3.3894 | 3.6290 | 2.5086 | 1.7364 | 1.7833    | 0.4521 | 2.4449 | 1.8143 | 2.0565 | 3.4575 | 1.5019 | 0 |
| 262 | 1144.3 | 4.7322 | 1.6030 | 1.3586 | 1.6853 | 4.1615 | 1.8849 | 1.1571 | 3.4567 | 3.5806 | 2.5389 | 1.7396 | 1.7841    | 0.4476 | 2.4427 | 1.8010 | 2.0816 | 3.4711 | 1.5014 | 0 |
| 263 | 1139.9 | 4.7142 | 1.6095 | 1.3535 | 1.7114 | 4.2237 | 1.8912 | 1.1595 | 3.5200 | 3.5290 | 2.5695 | 1.7417 | 1.7848    | 0.4431 | 2.4411 | 1.7884 | 2.1071 | 3.4844 | 1.5009 | 0 |

| nm  | THz    | eV     | Ag     |        | cSi    |        | Fe2O3  |        | GaAs   |        | TiO2   |        | P3HT:PCBM |        | CdTe   |        | aSi    |        | SiO2   |   |
|-----|--------|--------|--------|--------|--------|--------|--------|--------|--------|--------|--------|--------|-----------|--------|--------|--------|--------|--------|--------|---|
|     |        |        | n      | k      | n      | k      | n      | k      | n      | k      | n      | k      | n         | k      | n      | k      | n      | k      | n      | k |
| 264 | 1135.6 | 4.6964 | 1.6159 | 1.3482 | 1.7412 | 4.2878 | 1.8976 | 1.1619 | 3.5790 | 3.4747 | 2.6006 | 1.7429 | 1.7854    | 0.4387 | 2.4401 | 1.7766 | 2.1329 | 3.4975 | 1.5004 | 0 |
| 265 | 1131.3 | 4.6786 | 1.6221 | 1.3425 | 1.7751 | 4.3536 | 1.9040 | 1.1643 | 3.6336 | 3.4182 | 2.6320 | 1.7431 | 1.7859    | 0.4344 | 2.4395 | 1.7653 | 2.1589 | 3.5103 | 1.4999 | 0 |
| 266 | 1127   | 4.6611 | 1.6281 | 1.3366 | 1.8135 | 4.4209 | 1.9104 | 1.1666 | 3.6837 | 3.3599 | 2.6638 | 1.7423 | 1.7864    | 0.4300 | 2.4392 | 1.7543 | 2.1852 | 3.5229 | 1.4995 | 0 |
| 267 | 1122.8 | 4.6436 | 1.6340 | 1.3305 | 1.8566 | 4.4892 | 1.9169 | 1.1689 | 3.7293 | 3.3002 | 2.6958 | 1.7403 | 1.7867    | 0.4258 | 2.4392 | 1.7438 | 2.2118 | 3.5353 | 1.4990 | 0 |
| 268 | 1118.6 | 4.6263 | 1.6397 | 1.3240 | 1.9048 | 4.5584 | 1.9234 | 1.1712 | 3.7705 | 3.2397 | 2.7281 | 1.7373 | 1.7870    | 0.4216 | 2.4394 | 1.7335 | 2.2387 | 3.5474 | 1.4985 | 0 |
| 269 | 1114.5 | 4.6091 | 1.6453 | 1.3173 | 1.9583 | 4.6279 | 1.9300 | 1.1734 | 3.8072 | 3.1787 | 2.7605 | 1.7331 | 1.7871    | 0.4174 | 2.4397 | 1.7236 | 2.2659 | 3.5592 | 1.4981 | 0 |
| 270 | 1110.3 | 4.5920 | 1.6507 | 1.3102 | 2.0175 | 4.6973 | 1.9366 | 1.1756 | 3.8396 | 3.1175 | 2.7931 | 1.7277 | 1.7872    | 0.4133 | 2.4401 | 1.7138 | 2.2933 | 3.5708 | 1.4977 | 0 |
| 271 | 1106.3 | 4.5751 | 1.6560 | 1.3030 | 2.0824 | 4.7661 | 1.9432 | 1.1778 | 3.8680 | 3.0567 | 2.8257 | 1.7211 | 1.7872    | 0.4092 | 2.4404 | 1.7043 | 2.3210 | 3.5820 | 1.4972 | 0 |
| 272 | 1102.2 | 4.5582 | 1.6610 | 1.2954 | 2.1534 | 4.8336 | 1.9499 | 1.1799 | 3.8924 | 2.9964 | 2.8583 | 1.7134 | 1.7872    | 0.4052 | 2.4406 | 1.6950 | 2.3490 | 3.5930 | 1.4968 | 0 |
| 273 | 1098.1 | 4.5415 | 1.6659 | 1.2876 | 2.2304 | 4.8992 | 1.9566 | 1.1820 | 3.9131 | 2.9370 | 2.8909 | 1.7044 | 1.7870    | 0.4013 | 2.4408 | 1.6859 | 2.3772 | 3.6037 | 1.4964 | 0 |
| 274 | 1094.1 | 4.5250 | 1.6707 | 1.2795 | 2.3133 | 4.9623 | 1.9634 | 1.1840 | 3.9303 | 2.8787 | 2.9233 | 1.6941 | 1.7868    | 0.3974 | 2.4407 | 1.6771 | 2.4058 | 3.6140 | 1.4959 | 0 |
| 275 | 1090.2 | 4.5085 | 1.6753 | 1.2711 | 2.4021 | 5.0221 | 1.9701 | 1.1860 | 3.9442 | 2.8216 | 2.9556 | 1.6826 | 1.7865    | 0.3936 | 2.4405 | 1.6685 | 2.4345 | 3.6240 | 1.4955 | 0 |
| 276 | 1086.2 | 4.4922 | 1.6797 | 1.2624 | 2.4963 | 5.0780 | 1.9770 | 1.1880 | 3.9552 | 2.7660 | 2.9875 | 1.6698 | 1.7862    | 0.3898 | 2.4401 | 1.6603 | 2.4636 | 3.6337 | 1.4951 | 0 |
| 277 | 1082.3 | 4.4760 | 1.6840 | 1.2535 | 2.5956 | 5.1294 | 1.9839 | 1.1899 | 3.9634 | 2.7119 | 3.0192 | 1.6558 | 1.7857    | 0.3861 | 2.4395 | 1.6523 | 2.4929 | 3.6430 | 1.4947 | 0 |
| 278 | 1078.4 | 4.4599 | 1.6881 | 1.2443 | 2.6993 | 5.1758 | 1.9908 | 1.1918 | 3.9690 | 2.6596 | 3.0504 | 1.6406 | 1.7853    | 0.3824 | 2.4385 | 1.6446 | 2.5224 | 3.6519 | 1.4943 | 0 |
| 279 | 1074.5 | 4.4439 | 1.6921 | 1.2347 | 2.8066 | 5.2172 | 1.9977 | 1.1936 | 3.9723 | 2.6090 | 3.0812 | 1.6241 | 1.7847    | 0.3788 | 2.4374 | 1.6373 | 2.5522 | 3.6605 | 1.4939 | 0 |
| 280 | 1070.7 | 4.4280 | 1.6959 | 1.2249 | 2.9170 | 5.2535 | 2.0047 | 1.1954 | 3.9735 | 2.5602 | 3.1114 | 1.6064 | 1.7841    | 0.3753 | 2.4359 | 1.6304 | 2.5822 | 3.6687 | 1.4935 | 0 |
| 281 | 1066.9 | 4.4122 | 1.6997 | 1.2147 | 3.0297 | 5.2854 | 2.0117 | 1.1972 | 3.9728 | 2.5132 | 3.1410 | 1.5875 | 1.7834    | 0.3718 | 2.4342 | 1.6240 | 2.6125 | 3.6766 | 1.4932 | 0 |
| 282 | 1063.1 | 4.3966 | 1.7033 | 1.2042 | 3.1447 | 5.3138 | 2.0188 | 1.1989 | 3.9704 | 2.4681 | 3.1699 | 1.5675 | 1.7826    | 0.3683 | 2.4322 | 1.6179 | 2.6430 | 3.6840 | 1.4928 | 0 |
| 283 | 1059.3 | 4.3811 | 1.7068 | 1.1933 | 3.2627 | 5.3403 | 2.0259 | 1.2005 | 3.9665 | 2.4248 | 3.1980 | 1.5463 | 1.7818    | 0.3650 | 2.4299 | 1.6124 | 2.6737 | 3.6910 | 1.4924 | 0 |
| 284 | 1055.6 | 4.3656 | 1.7101 | 1.1821 | 3.3859 | 5.3659 | 2.0331 | 1.2021 | 3.9612 | 2.3834 | 3.2253 | 1.5241 | 1.7809    | 0.3617 | 2.4274 | 1.6074 | 2.7046 | 3.6976 | 1.4920 | 0 |
| 285 | 1051.9 | 4.3503 | 1.7134 | 1.1704 | 3.5184 | 5.3908 | 2.0403 | 1.2037 | 3.9547 | 2.3438 | 3.2517 | 1.5008 | 1.7800    | 0.3584 | 2.4247 | 1.6029 | 2.7358 | 3.7038 | 1.4917 | 0 |
| 286 | 1048.2 | 4.3351 | 1.7166 | 1.1583 | 3.6656 | 5.4118 | 2.0475 | 1.2052 | 3.9471 | 2.3060 | 3.2772 | 1.4766 | 1.7790    | 0.3552 | 2.4217 | 1.5991 | 2.7671 | 3.7095 | 1.4913 | 0 |
| 287 | 1044.6 | 4.3200 | 1.7196 | 1.1457 | 3.8318 | 5.4207 | 2.0547 | 1.2067 | 3.9386 | 2.2699 | 3.3016 | 1.4514 | 1.7779    | 0.3521 | 2.4185 | 1.5959 | 2.7986 | 3.7148 | 1.4910 | 0 |
| 288 | 1041   | 4.3050 | 1.7226 | 1.1326 | 4.0152 | 5.4048 | 2.0621 | 1.2081 | 3.9294 | 2.2356 | 3.3250 | 1.4254 | 1.7768    | 0.3490 | 2.4152 | 1.5933 | 2.8303 | 3.7196 | 1.4906 | 0 |
| 289 | 1037.3 | 4.2901 | 1.7255 | 1.1189 | 4.2044 | 5.3533 | 2.0694 | 1.2094 | 3.9194 | 2.2029 | 3.3472 | 1.3986 | 1.7757    | 0.3460 | 2.4117 | 1.5914 | 2.8621 | 3.7239 | 1.4903 | 0 |
| 290 | 1033.8 | 4.2753 | 1.7283 | 1.1046 | 4.3823 | 5.2648 | 2.0768 | 1.2107 | 3.9088 | 2.1718 | 3.3683 | 1.3711 | 1.7744    | 0.3431 | 2.4081 | 1.5903 | 2.8942 | 3.7278 | 1.4899 | 0 |
| 291 | 1030.2 | 4.2606 | 1.7309 | 1.0895 | 4.5349 | 5.1488 | 2.0842 | 1.2119 | 3.8977 | 2.1423 | 3.3882 | 1.3429 | 1.7731    | 0.3402 | 2.4044 | 1.5899 | 2.9263 | 3.7312 | 1.4896 | 0 |
| 292 | 1026.7 | 4.2460 | 1.7334 | 1.0737 | 4.6574 | 5.0188 | 2.0916 | 1.2131 | 3.8862 | 2.1143 | 3.4069 | 1.3142 | 1.7718    | 0.3374 | 2.4007 | 1.5904 | 2.9586 | 3.7341 | 1.4893 | 0 |
| 293 | 1023.2 | 4.2315 | 1.7357 | 1.0571 | 4.7520 | 4.8859 | 2.0991 | 1.2143 | 3.8743 | 2.0878 | 3.4244 | 1.2850 | 1.7704    | 0.3347 | 2.3971 | 1.5916 | 2.9910 | 3.7365 | 1.4889 | 0 |
| 294 | 1019.7 | 4.2171 | 1.7378 | 1.0395 | 4.8241 | 4.7569 | 2.1067 | 1.2153 | 3.8622 | 2.0626 | 3.4406 | 1.2553 | 1.7690    | 0.3320 | 2.3935 | 1.5938 | 3.0235 | 3.7384 | 1.4886 | 0 |
| 295 | 1016.3 | 4.2029 | 1.7396 | 1.0210 | 4.8789 | 4.6348 | 2.1142 | 1.2163 | 3.8498 | 2.0389 | 3.4556 | 1.2253 | 1.7675    | 0.3294 | 2.3901 | 1.5968 | 3.0562 | 3.7398 | 1.4883 | 0 |

| nm  | THz    | eV     | Ag     |        | cSi    |        | Fe2O3  |        | GaAs   |        | TiO2   |        | P3HT:PCBM |        | CdTe   |        | aSi    |        | SiO2   |   |
|-----|--------|--------|--------|--------|--------|--------|--------|--------|--------|--------|--------|--------|-----------|--------|--------|--------|--------|--------|--------|---|
|     |        |        | n      | k      | n      | k      | n      | k      | n      | k      | n      | k      | n         | k      | n      | k      | n      | k      | n      | k |
| 296 | 1012.8 | 4.1887 | 1.7410 | 1.0013 | 4.9206 | 4.5204 | 2.1218 | 1.2173 | 3.8373 | 2.0164 | 3.4693 | 1.1950 | 1.7659    | 0.3268 | 2.3869 | 1.6008 | 3.0888 | 3.7407 | 1.4880 | 0 |
| 297 | 1009.4 | 4.1746 | 1.7420 | 0.9804 | 4.9523 | 4.4139 | 2.1295 | 1.2182 | 3.8246 | 1.9952 | 3.4818 | 1.1646 | 1.7643    | 0.3244 | 2.3840 | 1.6056 | 3.1216 | 3.7410 | 1.4876 | 0 |
| 298 | 1006   | 4.1605 | 1.7425 | 0.9581 | 4.9764 | 4.3147 | 2.1371 | 1.2190 | 3.8119 | 1.9752 | 3.4930 | 1.1340 | 1.7626    | 0.3220 | 2.3815 | 1.6115 | 3.1544 | 3.7408 | 1.4873 | 0 |
| 299 | 1002.7 | 4.1466 | 1.7422 | 0.9345 | 4.9943 | 4.2224 | 2.1448 | 1.2198 | 3.7991 | 1.9564 | 3.5029 | 1.1034 | 1.7609    | 0.3197 | 2.3794 | 1.6183 | 3.1873 | 3.7401 | 1.4870 | 0 |
| 300 | 999.3  | 4.1328 | 1.7410 | 0.9094 | 5.0074 | 4.1366 | 2.1526 | 1.2205 | 3.7863 | 1.9387 | 3.5116 | 1.0728 | 1.7591    | 0.3174 | 2.3779 | 1.6261 | 3.2202 | 3.7388 | 1.4867 | 0 |
| 301 | 996    | 4.1191 | 1.7388 | 0.8827 | 5.0165 | 4.0568 | 2.1603 | 1.2211 | 3.7736 | 1.9221 | 3.5192 | 1.0423 | 1.7572    | 0.3153 | 2.3772 | 1.6348 | 3.2530 | 3.7370 | 1.4864 | 0 |
| 302 | 992.7  | 4.1054 | 1.7352 | 0.8544 | 5.0225 | 3.9825 | 2.1681 | 1.2216 | 3.7609 | 1.9065 | 3.5256 | 1.0120 | 1.7553    | 0.3132 | 2.3772 | 1.6445 | 3.2859 | 3.7347 | 1.4861 | 0 |
| 303 | 989.4  | 4.0919 | 1.7301 | 0.8244 | 5.0259 | 3.9135 | 2.1760 | 1.2221 | 3.7483 | 1.8920 | 3.5308 | 0.9818 | 1.7534    | 0.3112 | 2.3781 | 1.6551 | 3.3188 | 3.7318 | 1.4858 | 0 |
| 304 | 986.2  | 4.0784 | 1.7231 | 0.7927 | 5.0274 | 3.8494 | 2.1838 | 1.2226 | 3.7358 | 1.8784 | 3.5350 | 0.9519 | 1.7513    | 0.3093 | 2.3801 | 1.6666 | 3.3516 | 3.7283 | 1.4855 | 0 |
| 305 | 982.9  | 4.0651 | 1.7138 | 0.7594 | 5.0273 | 3.7899 | 2.1917 | 1.2229 | 3.7234 | 1.8657 | 3.5380 | 0.9224 | 1.7493    | 0.3075 | 2.3832 | 1.6789 | 3.3843 | 3.7243 | 1.4852 | 0 |
| 306 | 979.7  | 4.0518 | 1.7020 | 0.7247 | 5.0260 | 3.7346 | 2.1997 | 1.2232 | 3.7112 | 1.8539 | 3.5401 | 0.8932 | 1.7471    | 0.3058 | 2.3877 | 1.6920 | 3.4170 | 3.7198 | 1.4850 | 0 |
| 307 | 976.5  | 4.0386 | 1.6873 | 0.6887 | 5.0240 | 3.6834 | 2.2076 | 1.2234 | 3.6991 | 1.8430 | 3.5412 | 0.8644 | 1.7449    | 0.3042 | 2.3937 | 1.7056 | 3.4496 | 3.7147 | 1.4847 | 0 |
| 308 | 973.4  | 4.0255 | 1.6693 | 0.6516 | 5.0214 | 3.6359 | 2.2156 | 1.2236 | 3.6872 | 1.8329 | 3.5413 | 0.8360 | 1.7427    | 0.3028 | 2.4012 | 1.7197 | 3.4821 | 3.7090 | 1.4844 | 0 |
| 309 | 970.2  | 4.0124 | 1.6477 | 0.6138 | 5.0186 | 3.5918 | 2.2236 | 1.2236 | 3.6755 | 1.8235 | 3.5406 | 0.8081 | 1.7403    | 0.3014 | 2.4105 | 1.7342 | 3.5144 | 3.7029 | 1.4841 | 0 |
| 310 | 967.1  | 3.9995 | 1.6224 | 0.5757 | 5.0157 | 3.5510 | 2.2317 | 1.2236 | 3.6640 | 1.8150 | 3.5390 | 0.7808 | 1.7380    | 0.3002 | 2.4215 | 1.7488 | 3.5467 | 3.6961 | 1.4839 | 0 |
| 311 | 964    | 3.9866 | 1.5930 | 0.5378 | 5.0130 | 3.5132 | 2.2397 | 1.2235 | 3.6527 | 1.8072 | 3.5366 | 0.7539 | 1.7356    | 0.2991 | 2.4346 | 1.7633 | 3.5787 | 3.6889 | 1.4836 | 0 |
| 312 | 960.9  | 3.9739 | 1.5594 | 0.5005 | 5.0106 | 3.4782 | 2.2478 | 1.2234 | 3.6417 | 1.8001 | 3.5335 | 0.7277 | 1.7331    | 0.2982 | 2.4496 | 1.7775 | 3.6106 | 3.6810 | 1.4833 | 0 |
| 313 | 957.8  | 3.9612 | 1.5216 | 0.4644 | 5.0087 | 3.4457 | 2.2559 | 1.2231 | 3.6308 | 1.7938 | 3.5296 | 0.7019 | 1.7306    | 0.2974 | 2.4666 | 1.7911 | 3.6423 | 3.6727 | 1.4831 | 0 |
| 314 | 954.8  | 3.9485 | 1.4797 | 0.4300 | 5.0073 | 3.4155 | 2.2641 | 1.2228 | 3.6202 | 1.7881 | 3.5251 | 0.6768 | 1.7280    | 0.2968 | 2.4857 | 1.8038 | 3.6738 | 3.6639 | 1.4828 | 0 |
| 315 | 951.7  | 3.9360 | 1.4338 | 0.3979 | 5.0066 | 3.3876 | 2.2722 | 1.2224 | 3.6099 | 1.7830 | 3.5200 | 0.6523 | 1.7254    | 0.2964 | 2.5067 | 1.8153 | 3.7051 | 3.6545 | 1.4825 | 0 |
| 316 | 948.7  | 3.9236 | 1.3842 | 0.3685 | 5.0067 | 3.3615 | 2.2804 | 1.2219 | 3.5998 | 1.7786 | 3.5143 | 0.6284 | 1.7228    | 0.2962 | 2.5296 | 1.8253 | 3.7361 | 3.6446 | 1.4823 | 0 |
| 317 | 945.7  | 3.9112 | 1.3310 | 0.3422 | 5.0075 | 3.3373 | 2.2886 | 1.2213 | 3.5900 | 1.7748 | 3.5080 | 0.6051 | 1.7202    | 0.2962 | 2.5542 | 1.8335 | 3.7669 | 3.6343 | 1.4820 | 0 |
| 318 | 942.7  | 3.8989 | 1.2746 | 0.3194 | 5.0092 | 3.3146 | 2.2968 | 1.2207 | 3.5804 | 1.7715 | 3.5013 | 0.5824 | 1.7176    | 0.2965 | 2.5801 | 1.8395 | 3.7975 | 3.6234 | 1.4818 | 0 |
| 319 | 939.8  | 3.8867 | 1.2154 | 0.3004 | 5.0118 | 3.2934 | 2.3051 | 1.2199 | 3.5712 | 1.7689 | 3.4941 | 0.5604 | 1.7150    | 0.2970 | 2.6073 | 1.8431 | 3.8277 | 3.6121 | 1.4815 | 0 |
| 320 | 936.9  | 3.8745 | 1.1535 | 0.2854 | 5.0153 | 3.2735 | 2.3133 | 1.2191 | 3.5622 | 1.7668 | 3.4864 | 0.5389 | 1.7124    | 0.2977 | 2.6352 | 1.8442 | 3.8577 | 3.6002 | 1.4813 | 0 |
| 321 | 933.9  | 3.8624 | 1.0893 | 0.2747 | 5.0198 | 3.2548 | 2.3216 | 1.2182 | 3.5535 | 1.7652 | 3.4784 | 0.5181 | 1.7100    | 0.2988 | 2.6635 | 1.8425 | 3.8873 | 3.5880 | 1.4811 | 0 |
| 322 | 931    | 3.8504 | 1.0231 | 0.2685 | 5.0251 | 3.2371 | 2.3299 | 1.2172 | 3.5450 | 1.7642 | 3.4701 | 0.4979 | 1.7076    | 0.3001 | 2.6917 | 1.8381 | 3.9167 | 3.5753 | 1.4808 | 0 |
| 323 | 928.2  | 3.8385 | 0.9549 | 0.2672 | 5.0314 | 3.2202 | 2.3382 | 1.2161 | 3.5369 | 1.7637 | 3.4614 | 0.4783 | 1.7055    | 0.3017 | 2.7194 | 1.8309 | 3.9457 | 3.5621 | 1.4806 | 0 |
| 324 | 925.3  | 3.8267 | 0.8850 | 0.2711 | 5.0387 | 3.2042 | 2.3465 | 1.2149 | 3.5291 | 1.7637 | 3.4524 | 0.4593 | 1.7035    | 0.3037 | 2.7462 | 1.8210 | 3.9744 | 3.5485 | 1.4804 | 0 |
| 325 | 922.4  | 3.8149 | 0.8136 | 0.2809 | 5.0468 | 3.1888 | 2.3548 | 1.2137 | 3.5216 | 1.7641 | 3.4432 | 0.4409 | 1.7018    | 0.3059 | 2.7716 | 1.8086 | 4.0027 | 3.5345 | 1.4801 | 0 |
| 326 | 919.6  | 3.8032 | 0.7412 | 0.2975 | 5.0557 | 3.1740 | 2.3631 | 1.2123 | 3.5144 | 1.7651 | 3.4338 | 0.4231 | 1.7004    | 0.3084 | 2.7954 | 1.7941 | 4.0307 | 3.5201 | 1.4799 | 0 |
| 327 | 916.8  | 3.7916 | 0.6685 | 0.3218 | 5.0655 | 3.1597 | 2.3715 | 1.2109 | 3.5076 | 1.7665 | 3.4241 | 0.4058 | 1.6994    | 0.3111 | 2.8171 | 1.7777 | 4.0583 | 3.5054 | 1.4797 | 0 |

| nm  | THz   | eV     | Ag     |        | cSi    |        | Fe2O3  |        | GaAs   |        | TiO2   |        | P3HT:PCBM |        | CdTe   |        | aSi    |        | SiO2   |   |
|-----|-------|--------|--------|--------|--------|--------|--------|--------|--------|--------|--------|--------|-----------|--------|--------|--------|--------|--------|--------|---|
|     |       |        | n      | k      | n      | k      | n      | k      | n      | k      | n      | k      | n         | k      | n      | k      | n      | k      | n      | k |
| 328 | 914   | 3.7800 | 0.5973 | 0.3551 | 5.0761 | 3.1457 | 2.3798 | 1.2093 | 3.5010 | 1.7683 | 3.4143 | 0.3891 | 1.6988    | 0.3141 | 2.8365 | 1.7598 | 4.0855 | 3.4902 | 1.4794 | 0 |
| 329 | 911.2 | 3.7685 | 0.5301 | 0.3980 | 5.0874 | 3.1322 | 2.3882 | 1.2077 | 3.4948 | 1.7706 | 3.4043 | 0.3730 | 1.6987    | 0.3172 | 2.8535 | 1.7408 | 4.1123 | 3.4747 | 1.4792 | 0 |
| 330 | 908.5 | 3.7571 | 0.4702 | 0.4494 | 5.0994 | 3.1189 | 2.3965 | 1.2059 | 3.4889 | 1.7733 | 3.3942 | 0.3574 | 1.6992    | 0.3203 | 2.8681 | 1.7212 | 4.1388 | 3.4588 | 1.4790 | 0 |
| 331 | 905.7 | 3.7457 | 0.4202 | 0.5066 | 5.1120 | 3.1058 | 2.4048 | 1.2041 | 3.4834 | 1.7764 | 3.3840 | 0.3423 | 1.7003    | 0.3234 | 2.8802 | 1.7012 | 4.1648 | 3.4427 | 1.4788 | 0 |
| 332 | 903   | 3.7345 | 0.3807 | 0.5657 | 5.1251 | 3.0930 | 2.4132 | 1.2022 | 3.4782 | 1.7799 | 3.3737 | 0.3277 | 1.7019    | 0.3264 | 2.8900 | 1.6813 | 4.1904 | 3.4262 | 1.4786 | 0 |
| 333 | 900.3 | 3.7232 | 0.3504 | 0.6238 | 5.1388 | 3.0805 | 2.4215 | 1.2001 | 3.4733 | 1.7838 | 3.3633 | 0.3137 | 1.7042    | 0.3291 | 2.8974 | 1.6618 | 4.2157 | 3.4094 | 1.4784 | 0 |
| 334 | 897.6 | 3.7121 | 0.3273 | 0.6791 | 5.1530 | 3.0681 | 2.4299 | 1.1980 | 3.4689 | 1.7881 | 3.3528 | 0.3001 | 1.7069    | 0.3314 | 2.9027 | 1.6431 | 4.2405 | 3.3923 | 1.4782 | 0 |
| 335 | 894.9 | 3.7010 | 0.3097 | 0.7310 | 5.1676 | 3.0560 | 2.4382 | 1.1958 | 3.4647 | 1.7928 | 3.3423 | 0.2870 | 1.7101    | 0.3332 | 2.9062 | 1.6252 | 4.2649 | 3.3749 | 1.4779 | 0 |
| 336 | 892.2 | 3.6900 | 0.2960 | 0.7794 | 5.1826 | 3.0441 | 2.4465 | 1.1935 | 3.4610 | 1.7978 | 3.3318 | 0.2743 | 1.7137    | 0.3344 | 2.9079 | 1.6085 | 4.2889 | 3.3573 | 1.4777 | 0 |
| 337 | 889.6 | 3.6791 | 0.2852 | 0.8245 | 5.1979 | 3.0326 | 2.4548 | 1.1911 | 3.4576 | 1.8032 | 3.3212 | 0.2621 | 1.7174    | 0.3350 | 2.9082 | 1.5931 | 4.3124 | 3.3394 | 1.4775 | 0 |
| 338 | 887   | 3.6682 | 0.2766 | 0.8667 | 5.2135 | 3.0215 | 2.4631 | 1.1885 | 3.4547 | 1.8090 | 3.3106 | 0.2503 | 1.7213    | 0.3349 | 2.9072 | 1.5791 | 4.3355 | 3.3213 | 1.4773 | 0 |
| 339 | 884.3 | 3.6574 | 0.2695 | 0.9063 | 5.2295 | 3.0109 | 2.4714 | 1.1859 | 3.4521 | 1.8150 | 3.3001 | 0.2390 | 1.7251    | 0.3342 | 2.9052 | 1.5666 | 4.3582 | 3.3030 | 1.4771 | 0 |
| 340 | 881.7 | 3.6466 | 0.2637 | 0.9434 | 5.2458 | 3.0008 | 2.4797 | 1.1832 | 3.4499 | 1.8214 | 3.2895 | 0.2280 | 1.7287    | 0.3329 | 2.9024 | 1.5556 | 4.3805 | 3.2845 | 1.4769 | 0 |
| 341 | 879.2 | 3.6359 | 0.2588 | 0.9785 | 5.2625 | 2.9915 | 2.4880 | 1.1804 | 3.4481 | 1.8281 | 3.2790 | 0.2175 | 1.7321    | 0.3311 | 2.8990 | 1.5462 | 4.4024 | 3.2658 | 1.4767 | 0 |
| 342 | 876.6 | 3.6253 | 0.2546 | 1.0118 | 5.2797 | 2.9829 | 2.4962 | 1.1775 | 3.4468 | 1.8352 | 3.2685 | 0.2073 | 1.7352    | 0.3288 | 2.8952 | 1.5384 | 4.4238 | 3.2469 | 1.4765 | 0 |
| 343 | 874   | 3.6147 | 0.2509 | 1.0434 | 5.2975 | 2.9754 | 2.5044 | 1.1744 | 3.4459 | 1.8425 | 3.2581 | 0.1976 | 1.7379    | 0.3262 | 2.8912 | 1.5322 | 4.4448 | 3.2278 | 1.4764 | 0 |
| 344 | 871.5 | 3.6042 | 0.2477 | 1.0735 | 5.3159 | 2.9689 | 2.5126 | 1.1713 | 3.4454 | 1.8501 | 3.2477 | 0.1881 | 1.7402    | 0.3233 | 2.8870 | 1.5275 | 4.4654 | 3.2086 | 1.4762 | 0 |
| 345 | 869   | 3.5937 | 0.2447 | 1.1023 | 5.3353 | 2.9637 | 2.5208 | 1.1681 | 3.4453 | 1.8580 | 3.2373 | 0.1791 | 1.7421    | 0.3201 | 2.8830 | 1.5243 | 4.4855 | 3.1893 | 1.4760 | 0 |
| 346 | 866.5 | 3.5834 | 0.2421 | 1.1300 | 5.3558 | 2.9599 | 2.5289 | 1.1648 | 3.4457 | 1.8661 | 3.2270 | 0.1703 | 1.7435    | 0.3169 | 2.8793 | 1.5225 | 4.5053 | 3.1698 | 1.4758 | 0 |
| 347 | 864   | 3.5730 | 0.2397 | 1.1566 | 5.3778 | 2.9576 | 2.5370 | 1.1614 | 3.4465 | 1.8746 | 3.2168 | 0.1619 | 1.7446    | 0.3135 | 2.8759 | 1.5222 | 4.5246 | 3.1502 | 1.4756 | 0 |
| 348 | 861.5 | 3.5628 | 0.2374 | 1.1823 | 5.4017 | 2.9569 | 2.5451 | 1.1578 | 3.4479 | 1.8832 | 3.2066 | 0.1539 | 1.7452    | 0.3102 | 2.8730 | 1.5233 | 4.5435 | 3.1305 | 1.4754 | 0 |
| 349 | 859   | 3.5526 | 0.2353 | 1.2071 | 5.4278 | 2.9578 | 2.5531 | 1.1542 | 3.4497 | 1.8921 | 3.1965 | 0.1461 | 1.7456    | 0.3069 | 2.8707 | 1.5257 | 4.5620 | 3.1108 | 1.4752 | 0 |
| 350 | 856.6 | 3.5424 | 0.2333 | 1.2312 | 5.4568 | 2.9603 | 2.5612 | 1.1505 | 3.4520 | 1.9013 | 3.1865 | 0.1386 | 1.7456    | 0.3037 | 2.8692 | 1.5294 | 4.5801 | 3.0909 | 1.4751 | 0 |
| 351 | 854.1 | 3.5323 | 0.2314 | 1.2545 | 5.4893 | 2.9644 | 2.5691 | 1.1466 | 3.4548 | 1.9106 | 3.1766 | 0.1314 | 1.7454    | 0.3006 | 2.8686 | 1.5343 | 4.5978 | 3.0710 | 1.4749 | 0 |
| 352 | 851.7 | 3.5223 | 0.2296 | 1.2772 | 5.5259 | 2.9698 | 2.5771 | 1.1427 | 3.4580 | 1.9202 | 3.1667 | 0.1245 | 1.7449    | 0.2976 | 2.8690 | 1.5403 | 4.6151 | 3.0510 | 1.4747 | 0 |
| 353 | 849.3 | 3.5123 | 0.2279 | 1.2992 | 5.5674 | 2.9761 | 2.5850 | 1.1387 | 3.4619 | 1.9299 | 3.1569 | 0.1179 | 1.7442    | 0.2947 | 2.8705 | 1.5474 | 4.6320 | 3.0309 | 1.4745 | 0 |
| 354 | 846.9 | 3.5024 | 0.2262 | 1.3208 | 5.6146 | 2.9827 | 2.5928 | 1.1345 | 3.4662 | 1.9398 | 3.1473 | 0.1115 | 1.7433    | 0.2919 | 2.8733 | 1.5555 | 4.6485 | 3.0108 | 1.4744 | 0 |
| 355 | 844.5 | 3.4925 | 0.2246 | 1.3418 | 5.6683 | 2.9888 | 2.6006 | 1.1303 | 3.4711 | 1.9499 | 3.1377 | 0.1054 | 1.7422    | 0.2893 | 2.8775 | 1.5645 | 4.6647 | 2.9907 | 1.4742 | 0 |
| 356 | 842.1 | 3.4827 | 0.2230 | 1.3624 | 5.7292 | 2.9933 | 2.6084 | 1.1260 | 3.4765 | 1.9601 | 3.1282 | 0.0995 | 1.7410    | 0.2869 | 2.8832 | 1.5743 | 4.6804 | 2.9705 | 1.4740 | 0 |
| 357 | 839.8 | 3.4729 | 0.2215 | 1.3825 | 5.7980 | 2.9947 | 2.6161 | 1.1215 | 3.4825 | 1.9704 | 3.1188 | 0.0939 | 1.7397    | 0.2845 | 2.8906 | 1.5847 | 4.6958 | 2.9504 | 1.4738 | 0 |
| 358 | 837.4 | 3.4632 | 0.2201 | 1.4022 | 5.8751 | 2.9914 | 2.6237 | 1.1170 | 3.4891 | 1.9809 | 3.1095 | 0.0885 | 1.7383    | 0.2823 | 2.8999 | 1.5956 | 4.7108 | 2.9302 | 1.4737 | 0 |
| 359 | 835.1 | 3.4536 | 0.2186 | 1.4216 | 5.9603 | 2.9811 | 2.6313 | 1.1124 | 3.4962 | 1.9915 | 3.1002 | 0.0834 | 1.7367    | 0.2803 | 2.9111 | 1.6068 | 4.7255 | 2.9100 | 1.4735 | 0 |

| nm  | THz   | eV     | Ag     |        | cSi    |        | Fe2O3  |        | GaAs   |        | TiO2   |        | P3HT:PCBM |        | CdTe   |        | aSi    |        | SiO2   |   |
|-----|-------|--------|--------|--------|--------|--------|--------|--------|--------|--------|--------|--------|-----------|--------|--------|--------|--------|--------|--------|---|
|     |       |        | n      | k      | n      | k      | n      | k      | n      | k      | n      | k      | n         | k      | n      | k      | n      | k      | n      | k |
| 360 | 832.8 | 3.4440 | 0.2173 | 1.4406 | 6.0532 | 2.9616 | 2.6389 | 1.1077 | 3.5039 | 2.0021 | 3.0911 | 0.0784 | 1.7351    | 0.2784 | 2.9244 | 1.6182 | 4.7398 | 2.8898 | 1.4734 | 0 |
| 361 | 830.5 | 3.4345 | 0.2159 | 1.4593 | 6.1525 | 2.9305 | 2.6463 | 1.1028 | 3.5123 | 2.0128 | 3.0821 | 0.0737 | 1.7335    | 0.2766 | 2.9400 | 1.6294 | 4.7538 | 2.8697 | 1.4732 | 0 |
| 362 | 828.2 | 3.4250 | 0.2146 | 1.4776 | 6.2562 | 2.8855 | 2.6538 | 1.0979 | 3.5212 | 2.0236 | 3.0732 | 0.0692 | 1.7318    | 0.2749 | 2.9579 | 1.6401 | 4.7674 | 2.8495 | 1.4730 | 0 |
| 363 | 825.9 | 3.4155 | 0.2134 | 1.4957 | 6.3614 | 2.8248 | 2.6611 | 1.0929 | 3.5308 | 2.0344 | 3.0644 | 0.0648 | 1.7300    | 0.2734 | 2.9782 | 1.6500 | 4.7806 | 2.8294 | 1.4729 | 0 |
| 364 | 823.6 | 3.4062 | 0.2121 | 1.5135 | 6.4646 | 2.7474 | 2.6684 | 1.0878 | 3.5410 | 2.0452 | 3.0557 | 0.0607 | 1.7282    | 0.2719 | 3.0008 | 1.6587 | 4.7936 | 2.8093 | 1.4727 | 0 |
| 365 | 821.3 | 3.3968 | 0.2109 | 1.5310 | 6.5619 | 2.6531 | 2.6756 | 1.0826 | 3.5518 | 2.0559 | 3.0471 | 0.0568 | 1.7263    | 0.2706 | 3.0258 | 1.6659 | 4.8062 | 2.7892 | 1.4726 | 0 |
| 366 | 819.1 | 3.3875 | 0.2098 | 1.5483 | 6.6492 | 2.5434 | 2.6828 | 1.0774 | 3.5633 | 2.0667 | 3.0386 | 0.0531 | 1.7245    | 0.2694 | 3.0529 | 1.6710 | 4.8185 | 2.7692 | 1.4724 | 0 |
| 367 | 816.9 | 3.3783 | 0.2086 | 1.5654 | 6.7232 | 2.4206 | 2.6899 | 1.0720 | 3.5755 | 2.0774 | 3.0302 | 0.0495 | 1.7226    | 0.2683 | 3.0819 | 1.6737 | 4.8305 | 2.7492 | 1.4722 | 0 |
| 368 | 814.7 | 3.3691 | 0.2075 | 1.5822 | 6.7811 | 2.2880 | 2.6969 | 1.0665 | 3.5883 | 2.0879 | 3.0219 | 0.0461 | 1.7206    | 0.2672 | 3.1124 | 1.6736 | 4.8422 | 2.7292 | 1.4721 | 0 |
| 369 | 812.4 | 3.3600 | 0.2065 | 1.5988 | 6.8216 | 2.1497 | 2.7038 | 1.0610 | 3.6018 | 2.0984 | 3.0138 | 0.0429 | 1.7187    | 0.2663 | 3.1440 | 1.6704 | 4.8535 | 2.7093 | 1.4719 | 0 |
| 370 | 810.3 | 3.3509 | 0.2054 | 1.6153 | 6.8444 | 2.0096 | 2.7107 | 1.0554 | 3.6160 | 2.1088 | 3.0057 | 0.0398 | 1.7167    | 0.2655 | 3.1762 | 1.6639 | 4.8646 | 2.6895 | 1.4718 | 0 |
| 371 | 808.1 | 3.3419 | 0.2044 | 1.6315 | 6.8505 | 1.8713 | 2.7175 | 1.0496 | 3.6308 | 2.1189 | 2.9977 | 0.0369 | 1.7148    | 0.2647 | 3.2084 | 1.6539 | 4.8754 | 2.6697 | 1.4716 | 0 |
| 372 | 805.9 | 3.3329 | 0.2035 | 1.6475 | 6.8416 | 1.7378 | 2.7242 | 1.0439 | 3.6464 | 2.1289 | 2.9899 | 0.0342 | 1.7128    | 0.2641 | 3.2400 | 1.6405 | 4.8859 | 2.6500 | 1.4715 | 0 |
| 373 | 803.7 | 3.3240 | 0.2025 | 1.6634 | 6.8198 | 1.6113 | 2.7308 | 1.0380 | 3.6626 | 2.1386 | 2.9822 | 0.0316 | 1.7108    | 0.2635 | 3.2704 | 1.6238 | 4.8961 | 2.6304 | 1.4714 | 0 |
| 374 | 801.6 | 3.3151 | 0.2016 | 1.6791 | 6.7876 | 1.4932 | 2.7373 | 1.0320 | 3.6796 | 2.1481 | 2.9745 | 0.0292 | 1.7088    | 0.2630 | 3.2991 | 1.6043 | 4.9061 | 2.6108 | 1.4712 | 0 |
| 375 | 799.4 | 3.3062 | 0.2008 | 1.6946 | 6.7473 | 1.3842 | 2.7438 | 1.0260 | 3.6972 | 2.1573 | 2.9670 | 0.0269 | 1.7068    | 0.2626 | 3.3257 | 1.5821 | 4.9158 | 2.5913 | 1.4711 | 0 |
| 376 | 797.3 | 3.2975 | 0.1999 | 1.7100 | 6.7009 | 1.2844 | 2.7501 | 1.0199 | 3.7156 | 2.1662 | 2.9596 | 0.0247 | 1.7048    | 0.2622 | 3.3499 | 1.5579 | 4.9252 | 2.5718 | 1.4709 | 0 |
| 377 | 795.2 | 3.2887 | 0.1991 | 1.7252 | 6.6503 | 1.1936 | 2.7564 | 1.0137 | 3.7346 | 2.1747 | 2.9524 | 0.0227 | 1.7028    | 0.2619 | 3.3714 | 1.5322 | 4.9344 | 2.5525 | 1.4708 | 0 |
| 378 | 793.1 | 3.2800 | 0.1983 | 1.7403 | 6.5969 | 1.1113 | 2.7626 | 1.0074 | 3.7544 | 2.1828 | 2.9452 | 0.0208 | 1.7008    | 0.2617 | 3.3902 | 1.5053 | 4.9433 | 2.5332 | 1.4706 | 0 |
| 379 | 791   | 3.2714 | 0.1976 | 1.7552 | 6.5420 | 1.0369 | 2.7687 | 1.0011 | 3.7748 | 2.1905 | 2.9382 | 0.0191 | 1.6988    | 0.2616 | 3.4064 | 1.4778 | 4.9519 | 2.5140 | 1.4705 | 0 |
| 380 | 788.9 | 3.2627 | 0.1968 | 1.7700 | 6.4865 | 0.9697 | 2.7747 | 0.9947 | 3.7960 | 2.1977 | 2.9313 | 0.0174 | 1.6968    | 0.2616 | 3.4200 | 1.4500 | 4.9604 | 2.4949 | 1.4704 | 0 |
| 381 | 786.9 | 3.2542 | 0.1961 | 1.7847 | 6.4310 | 0.9090 | 2.7806 | 0.9883 | 3.8178 | 2.2045 | 2.9245 | 0.0159 | 1.6948    | 0.2616 | 3.4313 | 1.4224 | 4.9686 | 2.4758 | 1.4702 | 0 |
| 382 | 784.8 | 3.2457 | 0.1954 | 1.7992 | 6.3761 | 0.8541 | 2.7864 | 0.9817 | 3.8403 | 2.2106 | 2.9178 | 0.0145 | 1.6928    | 0.2616 | 3.4403 | 1.3952 | 4.9765 | 2.4569 | 1.4701 | 0 |
| 383 | 782.7 | 3.2372 | 0.1948 | 1.8136 | 6.3222 | 0.8044 | 2.7921 | 0.9751 | 3.8634 | 2.2162 | 2.9112 | 0.0131 | 1.6908    | 0.2618 | 3.4475 | 1.3685 | 4.9842 | 2.4380 | 1.4700 | 0 |
| 384 | 780.7 | 3.2288 | 0.1942 | 1.8279 | 6.2695 | 0.7593 | 2.7977 | 0.9685 | 3.8872 | 2.2212 | 2.9048 | 0.0119 | 1.6888    | 0.2620 | 3.4530 | 1.3426 | 4.9917 | 2.4192 | 1.4698 | 0 |
| 385 | 778.7 | 3.2204 | 0.1936 | 1.8421 | 6.2181 | 0.7182 | 2.8033 | 0.9618 | 3.9116 | 2.2255 | 2.8984 | 0.0108 | 1.6868    | 0.2623 | 3.4570 | 1.3176 | 4.9990 | 2.4006 | 1.4697 | 0 |
| 386 | 776.7 | 3.2120 | 0.1930 | 1.8561 | 6.1682 | 0.6807 | 2.8087 | 0.9550 | 3.9367 | 2.2291 | 2.8922 | 0.0098 | 1.6847    | 0.2626 | 3.4597 | 1.2934 | 5.0061 | 2.3820 | 1.4696 | 0 |
| 387 | 774.7 | 3.2037 | 0.1924 | 1.8701 | 6.1198 | 0.6464 | 2.8140 | 0.9482 | 3.9623 | 2.2319 | 2.8861 | 0.0088 | 1.6827    | 0.2630 | 3.4613 | 1.2702 | 5.0129 | 2.3635 | 1.4694 | 0 |
| 388 | 772.7 | 3.1955 | 0.1919 | 1.8839 | 6.0730 | 0.6150 | 2.8192 | 0.9413 | 3.9884 | 2.2340 | 2.8802 | 0.0080 | 1.6808    | 0.2635 | 3.4621 | 1.2478 | 5.0196 | 2.3450 | 1.4693 | 0 |
| 389 | 770.7 | 3.1873 | 0.1914 | 1.8977 | 6.0276 | 0.5860 | 2.8243 | 0.9344 | 4.0151 | 2.2352 | 2.8743 | 0.0072 | 1.6788    | 0.2641 | 3.4621 | 1.2264 | 5.0260 | 2.3267 | 1.4692 | 0 |
| 390 | 768.7 | 3.1791 | 0.1909 | 1.9113 | 5.9838 | 0.5593 | 2.8293 | 0.9275 | 4.0423 | 2.2356 | 2.8686 | 0.0065 | 1.6768    | 0.2647 | 3.4615 | 1.2058 | 5.0323 | 2.3085 | 1.4691 | 0 |
| 391 | 766.7 | 3.1710 | 0.1904 | 1.9249 | 5.9414 | 0.5347 | 2.8342 | 0.9204 | 4.0699 | 2.2351 | 2.8629 | 0.0058 | 1.6748    | 0.2653 | 3.4603 | 1.1860 | 5.0383 | 2.2903 | 1.4689 | 0 |

| nm  | THz   | eV     | Ag     |        | cSi    |        | Fe2O3  |        | GaAs   |        | TiO2   |        | P3HT:PCBM |        | CdTe   |        | aSi    |        | SiO2   |   |
|-----|-------|--------|--------|--------|--------|--------|--------|--------|--------|--------|--------|--------|-----------|--------|--------|--------|--------|--------|--------|---|
|     |       |        | n      | k      | n      | k      | n      | k      | n      | k      | n      | k      | n         | k      | n      | k      | n      | k      | n      | k |
| 392 | 764.8 | 3.1629 | 0.1900 | 1.9383 | 5.9004 | 0.5118 | 2.8390 | 0.9134 | 4.0980 | 2.2336 | 2.8574 | 0.0053 | 1.6728    | 0.2661 | 3.4587 | 1.1670 | 5.0442 | 2.2723 | 1.4688 | 0 |
| 393 | 762.8 | 3.1548 | 0.1896 | 1.9517 | 5.8608 | 0.4905 | 2.8437 | 0.9063 | 4.1264 | 2.2311 | 2.8520 | 0.0048 | 1.6709    | 0.2669 | 3.4567 | 1.1487 | 5.0499 | 2.2543 | 1.4687 | 0 |
| 394 | 760.9 | 3.1468 | 0.1892 | 1.9650 | 5.8224 | 0.4707 | 2.8483 | 0.8992 | 4.1552 | 2.2277 | 2.8468 | 0.0043 | 1.6689    | 0.2677 | 3.4544 | 1.1311 | 5.0554 | 2.2365 | 1.4686 | 0 |
| 395 | 759   | 3.1388 | 0.1888 | 1.9781 | 5.7853 | 0.4522 | 2.8527 | 0.8920 | 4.1842 | 2.2232 | 2.8416 | 0.0039 | 1.6669    | 0.2687 | 3.4518 | 1.1141 | 5.0607 | 2.2187 | 1.4685 | 0 |
| 396 | 757.1 | 3.1309 | 0.1884 | 1.9912 | 5.7494 | 0.4349 | 2.8571 | 0.8848 | 4.2135 | 2.2176 | 2.8365 | 0.0035 | 1.6650    | 0.2697 | 3.4490 | 1.0977 | 5.0658 | 2.2011 | 1.4683 | 0 |
| 397 | 755.1 | 3.1230 | 0.1881 | 2.0043 | 5.7146 | 0.4187 | 2.8614 | 0.8775 | 4.2430 | 2.2109 | 2.8316 | 0.0032 | 1.6631    | 0.2707 | 3.4460 | 1.0819 | 5.0708 | 2.1835 | 1.4682 | 0 |
| 398 | 753.2 | 3.1152 | 0.1878 | 2.0172 | 5.6808 | 0.4035 | 2.8655 | 0.8703 | 4.2725 | 2.2032 | 2.8268 | 0.0029 | 1.6611    | 0.2719 | 3.4429 | 1.0666 | 5.0756 | 2.1660 | 1.4681 | 0 |
| 399 | 751.4 | 3.1074 | 0.1875 | 2.0300 | 5.6481 | 0.3891 | 2.8695 | 0.8630 | 4.3022 | 2.1943 | 2.8220 | 0.0027 | 1.6592    | 0.2731 | 3.4396 | 1.0517 | 5.0802 | 2.1486 | 1.4680 | 0 |
| 400 | 749.5 | 3.0996 | 0.1872 | 2.0428 | 5.6164 | 0.3756 | 2.8735 | 0.8557 | 4.3318 | 2.1842 | 2.8174 | 0.0025 | 1.6573    | 0.2743 | 3.4361 | 1.0374 | 5.0846 | 2.1314 | 1.4679 | 0 |
| 401 | 747.6 | 3.0919 | 0.1869 | 2.0555 | 5.5856 | 0.3628 | 2.8773 | 0.8483 | 4.3614 | 2.1729 | 2.8128 | 0.0000 | 1.6554    | 0.2757 | 3.4326 | 1.0234 | 5.0889 | 2.1142 | 1.4678 | 0 |
| 402 | 745.8 | 3.0842 | 0.1866 | 2.0681 | 5.5558 | 0.3508 | 2.8810 | 0.8410 | 4.3909 | 2.1605 | 2.8084 | 0.0000 | 1.6535    | 0.2771 | 3.4290 | 1.0099 | 5.0931 | 2.0971 | 1.4676 | 0 |
| 403 | 743.9 | 3.0765 | 0.1864 | 2.0807 | 5.5267 | 0.3393 | 2.8846 | 0.8336 | 4.4202 | 2.1470 | 2.8041 | 0.0000 | 1.6517    | 0.2786 | 3.4253 | 0.9967 | 5.0971 | 2.0801 | 1.4675 | 0 |
| 404 | 742.1 | 3.0689 | 0.1862 | 2.0931 | 5.4985 | 0.3285 | 2.8881 | 0.8262 | 4.4492 | 2.1322 | 2.7998 | 0.0000 | 1.6498    | 0.2801 | 3.4215 | 0.9839 | 5.1009 | 2.0632 | 1.4674 | 0 |
| 405 | 740.2 | 3.0613 | 0.1860 | 2.1055 | 5.4710 | 0.3182 | 2.8915 | 0.8188 | 4.4778 | 2.1163 | 2.7957 | 0.0000 | 1.6480    | 0.2817 | 3.4176 | 0.9714 | 5.1046 | 2.0464 | 1.4673 | 0 |
| 406 | 738.4 | 3.0538 | 0.1858 | 2.1179 | 5.4443 | 0.3085 | 2.8948 | 0.8114 | 4.5061 | 2.0993 | 2.7916 | 0.0000 | 1.6462    | 0.2834 | 3.4137 | 0.9593 | 5.1081 | 2.0297 | 1.4672 | 0 |
| 407 | 736.6 | 3.0463 | 0.1856 | 2.1302 | 5.4183 | 0.2992 | 2.8979 | 0.8039 | 4.5339 | 2.0811 | 2.7876 | 0.0000 | 1.6444    | 0.2852 | 3.4097 | 0.9475 | 5.1115 | 2.0131 | 1.4671 | 0 |
| 408 | 734.8 | 3.0388 | 0.1854 | 2.1424 | 5.3930 | 0.2903 | 2.9010 | 0.7965 | 4.5612 | 2.0618 | 2.7837 | 0.0000 | 1.6427    | 0.2870 | 3.4056 | 0.9360 | 5.1147 | 1.9966 | 1.4670 | 0 |
| 409 | 733   | 3.0314 | 0.1853 | 2.1545 | 5.3683 | 0.2819 | 2.9039 | 0.7891 | 4.5879 | 2.0414 | 2.7799 | 0.0000 | 1.6409    | 0.2889 | 3.4015 | 0.9248 | 5.1178 | 1.9801 | 1.4669 | 0 |
| 410 | 731.2 | 3.0240 | 0.1851 | 2.1666 | 5.3442 | 0.2739 | 2.9068 | 0.7816 | 4.6139 | 2.0200 | 2.7761 | 0.0000 | 1.6392    | 0.2909 | 3.3973 | 0.9139 | 5.1208 | 1.9638 | 1.4668 | 0 |
| 411 | 729.4 | 3.0166 | 0.1850 | 2.1786 | 5.3208 | 0.2662 | 2.9095 | 0.7742 | 4.6391 | 1.9976 | 2.7725 | 0.0000 | 1.6375    | 0.2930 | 3.3931 | 0.9032 | 5.1236 | 1.9476 | 1.4667 | 0 |
| 412 | 727.7 | 3.0093 | 0.1849 | 2.1906 | 5.2979 | 0.2588 | 2.9122 | 0.7667 | 4.6636 | 1.9742 | 2.7689 | 0.0000 | 1.6358    | 0.2951 | 3.3889 | 0.8928 | 5.1263 | 1.9315 | 1.4665 | 0 |
| 413 | 725.9 | 3.0020 | 0.1848 | 2.2025 | 5.2756 | 0.2518 | 2.9147 | 0.7593 | 4.6873 | 1.9499 | 2.7653 | 0.0000 | 1.6342    | 0.2973 | 3.3846 | 0.8827 | 5.1289 | 1.9154 | 1.4664 | 0 |
| 414 | 724.1 | 2.9948 | 0.1847 | 2.2143 | 5.2537 | 0.2451 | 2.9171 | 0.7519 | 4.7101 | 1.9247 | 2.7619 | 0.0000 | 1.6326    | 0.2996 | 3.3803 | 0.8728 | 5.1313 | 1.8995 | 1.4663 | 0 |
| 415 | 722.4 | 2.9876 | 0.1846 | 2.2261 | 5.2325 | 0.2386 | 2.9194 | 0.7444 | 4.7319 | 1.8987 | 2.7585 | 0.0000 | 1.6311    | 0.3020 | 3.3759 | 0.8631 | 5.1337 | 1.8836 | 1.4662 | 0 |
| 416 | 720.7 | 2.9804 | 0.1845 | 2.2378 | 5.2117 | 0.2325 | 2.9216 | 0.7370 | 4.7528 | 1.8720 | 2.7552 | 0.0000 | 1.6295    | 0.3045 | 3.3715 | 0.8537 | 5.1358 | 1.8679 | 1.4661 | 0 |
| 417 | 718.9 | 2.9732 | 0.1844 | 2.2495 | 5.1913 | 0.2266 | 2.9238 | 0.7296 | 4.7726 | 1.8445 | 2.7519 | 0.0000 | 1.6280    | 0.3070 | 3.3671 | 0.8445 | 5.1379 | 1.8522 | 1.4660 | 0 |
| 418 | 717.2 | 2.9661 | 0.1844 | 2.2611 | 5.1714 | 0.2209 | 2.9258 | 0.7222 | 4.7914 | 1.8165 | 2.7487 | 0.0000 | 1.6266    | 0.3096 | 3.3627 | 0.8356 | 5.1399 | 1.8367 | 1.4659 | 0 |
| 419 | 715.5 | 2.9590 | 0.1843 | 2.2727 | 5.1520 | 0.2154 | 2.9277 | 0.7149 | 4.8091 | 1.7878 | 2.7455 | 0.0000 | 1.6252    | 0.3123 | 3.3583 | 0.8268 | 5.1417 | 1.8212 | 1.4658 | 0 |
| 420 | 713.8 | 2.9520 | 0.1843 | 2.2842 | 5.1330 | 0.2102 | 2.9295 | 0.7075 | 4.8258 | 1.7587 | 2.7424 | 0.0000 | 1.6239    | 0.3151 | 3.3538 | 0.8183 | 5.1434 | 1.8058 | 1.4657 | 0 |
| 421 | 712.1 | 2.9450 | 0.1843 | 2.2957 | 5.1144 | 0.2051 | 2.9312 | 0.7002 | 4.8413 | 1.7292 | 2.7394 | 0.0000 | 1.6226    | 0.3179 | 3.3494 | 0.8099 | 5.1450 | 1.7905 | 1.4656 | 0 |
| 422 | 710.4 | 2.9380 | 0.1843 | 2.3071 | 5.0962 | 0.2003 | 2.9328 | 0.6929 | 4.8557 | 1.6993 | 2.7364 | 0.0000 | 1.6213    | 0.3209 | 3.3449 | 0.8018 | 5.1464 | 1.7753 | 1.4655 | 0 |
| 423 | 708.7 | 2.9311 | 0.1843 | 2.3185 | 5.0784 | 0.1956 | 2.9343 | 0.6856 | 4.8690 | 1.6691 | 2.7335 | 0.0000 | 1.6201    | 0.3239 | 3.3404 | 0.7939 | 5.1478 | 1.7602 | 1.4654 | 0 |

| nm  | THz   | eV     | Ag     |        | cSi    |        | Fe2O3  |        | GaAs   |        | TiO2   |        | P3HT:PCBM |        | CdTe   |        | aSi    |        | SiO2   |   |
|-----|-------|--------|--------|--------|--------|--------|--------|--------|--------|--------|--------|--------|-----------|--------|--------|--------|--------|--------|--------|---|
|     |       |        | n      | k      | n      | k      | n      | k      | n      | k      | n      | k      | n         | k      | n      | k      | n      | k      | n      | k |
| 424 | 707.1 | 2.9242 | 0.1843 | 2.3298 | 5.0609 | 0.1911 | 2.9358 | 0.6783 | 4.8811 | 1.6387 | 2.7306 | 0.0000 | 1.6190    | 0.3270 | 3.3359 | 0.7861 | 5.1491 | 1.7452 | 1.4653 | 0 |
| 425 | 705.4 | 2.9173 | 0.1843 | 2.3411 | 5.0438 | 0.1868 | 2.9371 | 0.6711 | 4.8921 | 1.6081 | 2.7278 | 0.0000 | 1.6179    | 0.3302 | 3.3315 | 0.7786 | 5.1502 | 1.7303 | 1.4653 | 0 |
| 426 | 703.7 | 2.9104 | 0.1843 | 2.3523 | 5.0270 | 0.1827 | 2.9383 | 0.6638 | 4.9020 | 1.5774 | 2.7250 | 0.0000 | 1.6169    | 0.3334 | 3.3270 | 0.7712 | 5.1513 | 1.7155 | 1.4652 | 0 |
| 427 | 702.1 | 2.9036 | 0.1843 | 2.3635 | 5.0106 | 0.1786 | 2.9395 | 0.6567 | 4.9108 | 1.5466 | 2.7222 | 0.0000 | 1.6160    | 0.3368 | 3.3225 | 0.7640 | 5.1522 | 1.7008 | 1.4651 | 0 |
| 428 | 700.5 | 2.8968 | 0.1843 | 2.3746 | 4.9945 | 0.1748 | 2.9405 | 0.6495 | 4.9184 | 1.5159 | 2.7195 | 0.0000 | 1.6152    | 0.3402 | 3.3180 | 0.7570 | 5.1530 | 1.6861 | 1.4650 | 0 |
| 429 | 698.8 | 2.8901 | 0.1844 | 2.3857 | 4.9787 | 0.1710 | 2.9415 | 0.6424 | 4.9251 | 1.4853 | 2.7169 | 0.0000 | 1.6144    | 0.3437 | 3.3136 | 0.7502 | 5.1538 | 1.6716 | 1.4649 | 0 |
| 430 | 697.2 | 2.8834 | 0.1844 | 2.3968 | 4.9633 | 0.1674 | 2.9424 | 0.6353 | 4.9306 | 1.4548 | 2.7142 | 0.0000 | 1.6137    | 0.3473 | 3.3091 | 0.7435 | 5.1544 | 1.6571 | 1.4648 | 0 |
| 431 | 695.6 | 2.8767 | 0.1845 | 2.4078 | 4.9481 | 0.1639 | 2.9431 | 0.6282 | 4.9352 | 1.4245 | 2.7116 | 0.0000 | 1.6131    | 0.3509 | 3.3047 | 0.7370 | 5.1549 | 1.6428 | 1.4647 | 0 |
| 432 | 694   | 2.8700 | 0.1845 | 2.4188 | 4.9332 | 0.1606 | 2.9438 | 0.6212 | 4.9388 | 1.3944 | 2.7091 | 0.0000 | 1.6126    | 0.3547 | 3.3002 | 0.7306 | 5.1553 | 1.6285 | 1.4646 | 0 |
| 433 | 692.4 | 2.8634 | 0.1846 | 2.4297 | 4.9186 | 0.1573 | 2.9445 | 0.6142 | 4.9414 | 1.3645 | 2.7066 | 0.0000 | 1.6121    | 0.3585 | 3.2958 | 0.7245 | 5.1557 | 1.6143 | 1.4645 | 0 |
| 434 | 690.8 | 2.8568 | 0.1847 | 2.4406 | 4.9042 | 0.1542 | 2.9450 | 0.6073 | 4.9431 | 1.3350 | 2.7041 | 0.0000 | 1.6118    | 0.3623 | 3.2914 | 0.7184 | 5.1559 | 1.6003 | 1.4644 | 0 |
| 435 | 689.2 | 2.8502 | 0.1848 | 2.4514 | 4.8902 | 0.1511 | 2.9454 | 0.6004 | 4.9439 | 1.3059 | 2.7017 | 0.0000 | 1.6116    | 0.3663 | 3.2871 | 0.7125 | 5.1561 | 1.5863 | 1.4643 | 0 |
| 436 | 687.6 | 2.8437 | 0.1848 | 2.4622 | 4.8763 | 0.1482 | 2.9458 | 0.5935 | 4.9438 | 1.2771 | 2.6993 | 0.0000 | 1.6114    | 0.3703 | 3.2827 | 0.7068 | 5.1561 | 1.5724 | 1.4643 | 0 |
| 437 | 686   | 2.8372 | 0.1849 | 2.4730 | 4.8628 | 0.1454 | 2.9461 | 0.5867 | 4.9429 | 1.2487 | 2.6969 | 0.0000 | 1.6114    | 0.3744 | 3.2784 | 0.7012 | 5.1561 | 1.5585 | 1.4642 | 0 |
| 438 | 684.5 | 2.8307 | 0.1850 | 2.4838 | 4.8494 | 0.1426 | 2.9463 | 0.5799 | 4.9413 | 1.2208 | 2.6945 | 0.0000 | 1.6115    | 0.3785 | 3.2741 | 0.6957 | 5.1560 | 1.5448 | 1.4641 | 0 |
| 439 | 682.9 | 2.8242 | 0.1851 | 2.4945 | 4.8363 | 0.1400 | 2.9465 | 0.5731 | 4.9389 | 1.1933 | 2.6922 | 0.0000 | 1.6117    | 0.3827 | 3.2698 | 0.6904 | 5.1558 | 1.5312 | 1.4640 | 0 |
| 440 | 681.3 | 2.8178 | 0.1852 | 2.5051 | 4.8235 | 0.1374 | 2.9465 | 0.5665 | 4.9358 | 1.1664 | 2.6900 | 0.0000 | 1.6120    | 0.3870 | 3.2656 | 0.6852 | 5.1555 | 1.5176 | 1.4639 | 0 |
| 441 | 679.8 | 2.8114 | 0.1853 | 2.5158 | 4.8108 | 0.1349 | 2.9465 | 0.5598 | 4.9321 | 1.1399 | 2.6877 | 0.0000 | 1.6125    | 0.3913 | 3.2614 | 0.6802 | 5.1551 | 1.5042 | 1.4638 | 0 |
| 442 | 678.3 | 2.8051 | 0.1854 | 2.5264 | 4.7984 | 0.1324 | 2.9464 | 0.5532 | 4.9277 | 1.1139 | 2.6855 | 0.0000 | 1.6130    | 0.3956 | 3.2572 | 0.6752 | 5.1546 | 1.4908 | 1.4637 | 0 |
| 443 | 676.7 | 2.7987 | 0.1856 | 2.5369 | 4.7861 | 0.1301 | 2.9463 | 0.5466 | 4.9228 | 1.0885 | 2.6833 | 0.0000 | 1.6137    | 0.4000 | 3.2531 | 0.6704 | 5.1541 | 1.4775 | 1.4637 | 0 |
| 444 | 675.2 | 2.7924 | 0.1857 | 2.5475 | 4.7741 | 0.1278 | 2.9461 | 0.5401 | 4.9173 | 1.0636 | 2.6811 | 0.0000 | 1.6145    | 0.4045 | 3.2489 | 0.6657 | 5.1535 | 1.4644 | 1.4636 | 0 |
| 445 | 673.7 | 2.7862 | 0.1858 | 2.5580 | 4.7623 | 0.1256 | 2.9458 | 0.5337 | 4.9113 | 1.0393 | 2.6790 | 0.0000 | 1.6155    | 0.4089 | 3.2449 | 0.6612 | 5.1528 | 1.4513 | 1.4635 | 0 |
| 446 | 672.2 | 2.7799 | 0.1859 | 2.5684 | 4.7507 | 0.1235 | 2.9454 | 0.5273 | 4.9048 | 1.0155 | 2.6769 | 0.0000 | 1.6166    | 0.4134 | 3.2408 | 0.6567 | 5.1520 | 1.4382 | 1.4634 | 0 |
| 447 | 670.7 | 2.7737 | 0.1861 | 2.5788 | 4.7393 | 0.1214 | 2.9450 | 0.5209 | 4.8979 | 0.9923 | 2.6748 | 0.0000 | 1.6178    | 0.4180 | 3.2368 | 0.6524 | 5.1511 | 1.4253 | 1.4633 | 0 |
| 448 | 669.2 | 2.7675 | 0.1862 | 2.5892 | 4.7280 | 0.1194 | 2.9445 | 0.5146 | 4.8905 | 0.9696 | 2.6727 | 0.0000 | 1.6192    | 0.4225 | 3.2328 | 0.6481 | 5.1502 | 1.4125 | 1.4633 | 0 |
| 449 | 667.7 | 2.7613 | 0.1863 | 2.5996 | 4.7170 | 0.1174 | 2.9440 | 0.5083 | 4.8828 | 0.9475 | 2.6707 | 0.0000 | 1.6207    | 0.4271 | 3.2289 | 0.6440 | 5.1492 | 1.3997 | 1.4632 | 0 |
| 450 | 666.2 | 2.7552 | 0.1865 | 2.6100 | 4.7061 | 0.1155 | 2.9434 | 0.5021 | 4.8748 | 0.9260 | 2.6687 | 0.0000 | 1.6224    | 0.4317 | 3.2250 | 0.6400 | 5.1481 | 1.3871 | 1.4631 | 0 |
| 451 | 664.7 | 2.7491 | 0.1866 | 2.6203 | 4.6954 | 0.1137 | 2.9427 | 0.4959 | 4.8664 | 0.9050 | 2.6667 | 0.0000 | 1.6242    | 0.4363 | 3.2212 | 0.6361 | 5.1470 | 1.3745 | 1.4630 | 0 |
| 452 | 663.3 | 2.7430 | 0.1868 | 2.6305 | 4.6848 | 0.1119 | 2.9420 | 0.4898 | 4.8577 | 0.8845 | 2.6647 | 0.0000 | 1.6261    | 0.4409 | 3.2174 | 0.6323 | 5.1457 | 1.3620 | 1.4629 | 0 |
| 453 | 661.8 | 2.7370 | 0.1869 | 2.6408 | 4.6744 | 0.1101 | 2.9412 | 0.4838 | 4.8488 | 0.8646 | 2.6627 | 0.0000 | 1.6282    | 0.4455 | 3.2136 | 0.6286 | 5.1444 | 1.3496 | 1.4629 | 0 |
| 454 | 660.3 | 2.7309 | 0.1871 | 2.6510 | 4.6642 | 0.1084 | 2.9404 | 0.4778 | 4.8396 | 0.8453 | 2.6608 | 0.0000 | 1.6305    | 0.4500 | 3.2099 | 0.6250 | 5.1431 | 1.3373 | 1.4628 | 0 |
| 455 | 658.9 | 2.7249 | 0.1873 | 2.6612 | 4.6541 | 0.1068 | 2.9395 | 0.4718 | 4.8302 | 0.8264 | 2.6589 | 0.0000 | 1.6329    | 0.4546 | 3.2062 | 0.6214 | 5.1416 | 1.3251 | 1.4627 | 0 |



| nm  | THz   | eV     | Ag     |        | cSi    |        | Fe2O3  |        | GaAs   |        | TiO2   |        | P3HT:PCBM |        | CdTe   |        | aSi    |        | SiO2   |   |
|-----|-------|--------|--------|--------|--------|--------|--------|--------|--------|--------|--------|--------|-----------|--------|--------|--------|--------|--------|--------|---|
|     |       |        | n      | k      | n      | k      | n      | k      | n      | k      | n      | k      | n         | k      | n      | k      | n      | k      | n      | k |
| 456 | 657.4 | 2.7190 | 0.1874 | 2.6714 | 4.6442 | 0.1052 | 2.9385 | 0.4659 | 4.8206 | 0.8081 | 2.6570 | 0.0000 | 1.6354    | 0.4592 | 3.2025 | 0.6180 | 5.1401 | 1.3130 | 1.4626 | 0 |
| 457 | 656   | 2.7130 | 0.1876 | 2.6815 | 4.6345 | 0.1036 | 2.9375 | 0.4601 | 4.8109 | 0.7903 | 2.6552 | 0.0000 | 1.6381    | 0.4637 | 3.1989 | 0.6146 | 5.1386 | 1.3009 | 1.4626 | 0 |
| 458 | 654.6 | 2.7071 | 0.1878 | 2.6916 | 4.6249 | 0.1021 | 2.9365 | 0.4543 | 4.8009 | 0.7730 | 2.6533 | 0.0000 | 1.6409    | 0.4682 | 3.1954 | 0.6114 | 5.1369 | 1.2890 | 1.4625 | 0 |
| 459 | 653.1 | 2.7012 | 0.1879 | 2.7017 | 4.6154 | 0.1006 | 2.9354 | 0.4486 | 4.7909 | 0.7562 | 2.6515 | 0.0000 | 1.6439    | 0.4726 | 3.1919 | 0.6082 | 5.1352 | 1.2771 | 1.4624 | 0 |
| 460 | 651.7 | 2.6953 | 0.1881 | 2.7118 | 4.6061 | 0.0992 | 2.9343 | 0.4429 | 4.7808 | 0.7399 | 2.6497 | 0.0000 | 1.6470    | 0.4771 | 3.1884 | 0.6051 | 5.1335 | 1.2653 | 1.4623 | 0 |
| 461 | 650.3 | 2.6895 | 0.1883 | 2.7218 | 4.5969 | 0.0978 | 2.9331 | 0.4373 | 4.7705 | 0.7240 | 2.6479 | 0.0000 | 1.6503    | 0.4814 | 3.1850 | 0.6021 | 5.1317 | 1.2536 | 1.4623 | 0 |
| 462 | 648.9 | 2.6836 | 0.1884 | 2.7318 | 4.5878 | 0.0964 | 2.9319 | 0.4317 | 4.7602 | 0.7086 | 2.6462 | 0.0000 | 1.6537    | 0.4858 | 3.1816 | 0.5992 | 5.1298 | 1.2420 | 1.4622 | 0 |
| 463 | 647.5 | 2.6778 | 0.1886 | 2.7418 | 4.5789 | 0.0951 | 2.9306 | 0.4262 | 4.7498 | 0.6937 | 2.6444 | 0.0000 | 1.6573    | 0.4901 | 3.1783 | 0.5963 | 5.1278 | 1.2304 | 1.4621 | 0 |
| 464 | 646.1 | 2.6721 | 0.1888 | 2.7518 | 4.5701 | 0.0938 | 2.9293 | 0.4207 | 4.7394 | 0.6792 | 2.6427 | 0.0000 | 1.6610    | 0.4943 | 3.1750 | 0.5935 | 5.1259 | 1.2190 | 1.4620 | 0 |
| 465 | 644.7 | 2.6663 | 0.1890 | 2.7617 | 4.5614 | 0.0925 | 2.9279 | 0.4153 | 4.7289 | 0.6651 | 2.6410 | 0.0000 | 1.6648    | 0.4985 | 3.1718 | 0.5908 | 5.1238 | 1.2076 | 1.4620 | 0 |
| 466 | 643.3 | 2.6606 | 0.1892 | 2.7716 | 4.5528 | 0.0913 | 2.9265 | 0.4100 | 4.7184 | 0.6514 | 2.6393 | 0.0000 | 1.6688    | 0.5025 | 3.1686 | 0.5881 | 5.1217 | 1.1963 | 1.4619 | 0 |
| 467 | 642   | 2.6549 | 0.1894 | 2.7815 | 4.5444 | 0.0901 | 2.9251 | 0.4047 | 4.7079 | 0.6382 | 2.6376 | 0.0000 | 1.6729    | 0.5066 | 3.1655 | 0.5856 | 5.1195 | 1.1851 | 1.4618 | 0 |
| 468 | 640.6 | 2.6492 | 0.1896 | 2.7914 | 4.5361 | 0.0889 | 2.9236 | 0.3994 | 4.6973 | 0.6253 | 2.6360 | 0.0000 | 1.6771    | 0.5105 | 3.1624 | 0.5830 | 5.1173 | 1.1740 | 1.4618 | 0 |
| 469 | 639.2 | 2.6436 | 0.1897 | 2.8012 | 4.5279 | 0.0878 | 2.9221 | 0.3943 | 4.6868 | 0.6129 | 2.6344 | 0.0000 | 1.6815    | 0.5144 | 3.1594 | 0.5806 | 5.1150 | 1.1630 | 1.4617 | 0 |
| 470 | 637.9 | 2.6380 | 0.1899 | 2.8110 | 4.5198 | 0.0866 | 2.9206 | 0.3891 | 4.6763 | 0.6008 | 2.6327 | 0.0000 | 1.6860    | 0.5182 | 3.1564 | 0.5782 | 5.1127 | 1.1520 | 1.4616 | 0 |
| 471 | 636.5 | 2.6324 | 0.1901 | 2.8208 | 4.5118 | 0.0856 | 2.9190 | 0.3841 | 4.6658 | 0.5891 | 2.6311 | 0.0000 | 1.6906    | 0.5219 | 3.1534 | 0.5759 | 5.1103 | 1.1412 | 1.4616 | 0 |
| 472 | 635.2 | 2.6268 | 0.1903 | 2.8306 | 4.5039 | 0.0845 | 2.9174 | 0.3790 | 4.6554 | 0.5777 | 2.6295 | 0.0000 | 1.6954    | 0.5255 | 3.1505 | 0.5736 | 5.1079 | 1.1304 | 1.4615 | 0 |
| 473 | 633.8 | 2.6212 | 0.1905 | 2.8404 | 4.4962 | 0.0835 | 2.9158 | 0.3741 | 4.6450 | 0.5667 | 2.6280 | 0.0000 | 1.7003    | 0.5291 | 3.1477 | 0.5714 | 5.1055 | 1.1197 | 1.4614 | 0 |
| 474 | 632.5 | 2.6157 | 0.1907 | 2.8501 | 4.4885 | 0.0824 | 2.9141 | 0.3691 | 4.6346 | 0.5560 | 2.6264 | 0.0000 | 1.7053    | 0.5325 | 3.1449 | 0.5692 | 5.1029 | 1.1091 | 1.4614 | 0 |
| 475 | 631.1 | 2.6102 | 0.1909 | 2.8598 | 4.4809 | 0.0815 | 2.9124 | 0.3643 | 4.6243 | 0.5456 | 2.6249 | 0.0000 | 1.7104    | 0.5358 | 3.1422 | 0.5671 | 5.1004 | 1.0985 | 1.4613 | 0 |
| 476 | 629.8 | 2.6047 | 0.1911 | 2.8695 | 4.4735 | 0.0805 | 2.9107 | 0.3595 | 4.6140 | 0.5355 | 2.6234 | 0.0000 | 1.7157    | 0.5391 | 3.1395 | 0.5650 | 5.0977 | 1.0881 | 1.4612 | 0 |
| 477 | 628.5 | 2.5992 | 0.1913 | 2.8792 | 4.4661 | 0.0796 | 2.9089 | 0.3547 | 4.6038 | 0.5258 | 2.6218 | 0.0000 | 1.7211    | 0.5422 | 3.1368 | 0.5630 | 5.0951 | 1.0777 | 1.4612 | 0 |
| 478 | 627.2 | 2.5938 | 0.1915 | 2.8888 | 4.4588 | 0.0786 | 2.9071 | 0.3500 | 4.5937 | 0.5163 | 2.6204 | 0.0000 | 1.7265    | 0.5452 | 3.1342 | 0.5610 | 5.0924 | 1.0674 | 1.4611 | 0 |
| 479 | 625.9 | 2.5884 | 0.1917 | 2.8984 | 4.4517 | 0.0777 | 2.9053 | 0.3454 | 4.5836 | 0.5071 | 2.6189 | 0.0000 | 1.7322    | 0.5481 | 3.1317 | 0.5591 | 5.0896 | 1.0572 | 1.4610 | 0 |
| 480 | 624.6 | 2.5830 | 0.1919 | 2.9081 | 4.4446 | 0.0769 | 2.9035 | 0.3408 | 4.5736 | 0.4982 | 2.6174 | 0.0000 | 1.7379    | 0.5508 | 3.1291 | 0.5572 | 5.0868 | 1.0471 | 1.4610 | 0 |
| 481 | 623.3 | 2.5776 | 0.1921 | 2.9177 | 4.4376 | 0.0760 | 2.9017 | 0.3363 | 4.5637 | 0.4896 | 2.6160 | 0.0000 | 1.7437    | 0.5534 | 3.1267 | 0.5554 | 5.0840 | 1.0370 | 1.4609 | 0 |
| 482 | 622   | 2.5723 | 0.1924 | 2.9272 | 4.4307 | 0.0752 | 2.8998 | 0.3318 | 4.5538 | 0.4812 | 2.6145 | 0.0000 | 1.7496    | 0.5559 | 3.1243 | 0.5536 | 5.0811 | 1.0271 | 1.4608 | 0 |
| 483 | 620.7 | 2.5670 | 0.1926 | 2.9368 | 4.4239 | 0.0744 | 2.8979 | 0.3273 | 4.5441 | 0.4730 | 2.6131 | 0.0000 | 1.7557    | 0.5583 | 3.1219 | 0.5518 | 5.0782 | 1.0172 | 1.4608 | 0 |
| 484 | 619.4 | 2.5617 | 0.1928 | 2.9463 | 4.4171 | 0.0736 | 2.8960 | 0.3230 | 4.5344 | 0.4652 | 2.6117 | 0.0000 | 1.7618    | 0.5605 | 3.1196 | 0.5501 | 5.0753 | 1.0074 | 1.4607 | 0 |
| 485 | 618.1 | 2.5564 | 0.1930 | 2.9558 | 4.4105 | 0.0728 | 2.8940 | 0.3186 | 4.5248 | 0.4575 | 2.6103 | 0.0000 | 1.7680    | 0.5626 | 3.1173 | 0.5484 | 5.0723 | 0.9976 | 1.4606 | 0 |
| 486 | 616.9 | 2.5511 | 0.1932 | 2.9653 | 4.4039 | 0.0720 | 2.8921 | 0.3143 | 4.5153 | 0.4501 | 2.6089 | 0.0000 | 1.7744    | 0.5645 | 3.1151 | 0.5468 | 5.0693 | 0.9880 | 1.4606 | 0 |
| 487 | 615.6 | 2.5459 | 0.1934 | 2.9748 | 4.3974 | 0.0712 | 2.8901 | 0.3101 | 4.5058 | 0.4429 | 2.6075 | 0.0000 | 1.7808    | 0.5663 | 3.1129 | 0.5452 | 5.0662 | 0.9784 | 1.4605 | 0 |

| nm  | THz   | eV     | Ag     |        | cSi    |        | Fe2O3  |        | GaAs   |        | TiO2   |        | P3HT:PCBM |        | CdTe   |        | aSi    |        | SiO2   |   |
|-----|-------|--------|--------|--------|--------|--------|--------|--------|--------|--------|--------|--------|-----------|--------|--------|--------|--------|--------|--------|---|
|     |       |        | n      | k      | n      | k      | n      | k      | n      | k      | n      | k      | n         | k      | n      | k      | n      | k      | n      | k |
| 488 | 614.3 | 2.5407 | 0.1936 | 2.9843 | 4.3910 | 0.0705 | 2.8881 | 0.3059 | 4.4965 | 0.4359 | 2.6062 | 0.0000 | 1.7873    | 0.5679 | 3.1108 | 0.5436 | 5.0631 | 0.9689 | 1.4605 | 0 |
| 489 | 613.1 | 2.5355 | 0.1938 | 2.9937 | 4.3847 | 0.0698 | 2.8861 | 0.3018 | 4.4873 | 0.4291 | 2.6048 | 0.0000 | 1.7938    | 0.5694 | 3.1087 | 0.5420 | 5.0599 | 0.9595 | 1.4604 | 0 |
| 490 | 611.8 | 2.5303 | 0.1940 | 3.0032 | 4.3785 | 0.0691 | 2.8841 | 0.2977 | 4.4781 | 0.4225 | 2.6035 | 0.0000 | 1.8005    | 0.5706 | 3.1067 | 0.5405 | 5.0568 | 0.9502 | 1.4603 | 0 |
| 491 | 610.6 | 2.5251 | 0.1943 | 3.0126 | 4.3723 | 0.0684 | 2.8821 | 0.2937 | 4.4691 | 0.4161 | 2.6022 | 0.0000 | 1.8072    | 0.5717 | 3.1047 | 0.5390 | 5.0536 | 0.9409 | 1.4603 | 0 |
| 492 | 609.3 | 2.5200 | 0.1945 | 3.0220 | 4.3662 | 0.0677 | 2.8800 | 0.2897 | 4.4601 | 0.4099 | 2.6009 | 0.0000 | 1.8140    | 0.5726 | 3.1027 | 0.5375 | 5.0503 | 0.9317 | 1.4602 | 0 |
| 493 | 608.1 | 2.5149 | 0.1947 | 3.0314 | 4.3602 | 0.0671 | 2.8779 | 0.2858 | 4.4512 | 0.4039 | 2.5996 | 0.0000 | 1.8208    | 0.5734 | 3.1008 | 0.5360 | 5.0471 | 0.9226 | 1.4602 | 0 |
| 494 | 606.9 | 2.5098 | 0.1949 | 3.0407 | 4.3542 | 0.0664 | 2.8759 | 0.2819 | 4.4424 | 0.3980 | 2.5983 | 0.0000 | 1.8277    | 0.5739 | 3.0990 | 0.5346 | 5.0438 | 0.9136 | 1.4601 | 0 |
| 495 | 605.6 | 2.5047 | 0.1951 | 3.0501 | 4.3483 | 0.0658 | 2.8738 | 0.2781 | 4.4338 | 0.3924 | 2.5970 | 0.0000 | 1.8346    | 0.5743 | 3.0972 | 0.5332 | 5.0404 | 0.9046 | 1.4600 | 0 |
| 496 | 604.4 | 2.4997 | 0.1953 | 3.0594 | 4.3425 | 0.0652 | 2.8717 | 0.2743 | 4.4252 | 0.3868 | 2.5958 | 0.0000 | 1.8415    | 0.5745 | 3.0954 | 0.5318 | 5.0371 | 0.8958 | 1.4600 | 0 |
| 497 | 603.2 | 2.4947 | 0.1955 | 3.0687 | 4.3367 | 0.0646 | 2.8696 | 0.2705 | 4.4167 | 0.3815 | 2.5945 | 0.0000 | 1.8485    | 0.5744 | 3.0937 | 0.5304 | 5.0337 | 0.8870 | 1.4599 | 0 |
| 498 | 602   | 2.4896 | 0.1958 | 3.0780 | 4.3310 | 0.0640 | 2.8674 | 0.2668 | 4.4083 | 0.3763 | 2.5933 | 0.0000 | 1.8555    | 0.5742 | 3.0920 | 0.5291 | 5.0303 | 0.8782 | 1.4599 | 0 |
| 499 | 600.8 | 2.4847 | 0.1960 | 3.0873 | 4.3254 | 0.0634 | 2.8653 | 0.2632 | 4.4000 | 0.3712 | 2.5921 | 0.0000 | 1.8625    | 0.5738 | 3.0903 | 0.5278 | 5.0268 | 0.8696 | 1.4598 | 0 |
| 500 | 599.6 | 2.4797 | 0.1962 | 3.0966 | 4.3199 | 0.0628 | 2.8632 | 0.2596 | 4.3918 | 0.3663 | 2.5909 | 0.0000 | 1.8694    | 0.5731 | 3.0887 | 0.5264 | 5.0234 | 0.8610 | 1.4598 | 0 |
| 501 | 598.4 | 2.4747 | 0.1964 | 3.1058 | 4.3144 | 0.0622 | 2.8610 | 0.2560 | 4.3836 | 0.3615 | 2.5897 | 0.0000 | 1.8764    | 0.5723 | 3.0871 | 0.5251 | 5.0199 | 0.8525 | 1.4597 | 0 |
| 502 | 597.2 | 2.4698 | 0.1966 | 3.1151 | 4.3089 | 0.0617 | 2.8589 | 0.2525 | 4.3756 | 0.3569 | 2.5885 | 0.0000 | 1.8834    | 0.5713 | 3.0856 | 0.5238 | 5.0163 | 0.8441 | 1.4596 | 0 |
| 503 | 596   | 2.4649 | 0.1969 | 3.1243 | 4.3036 | 0.0612 | 2.8567 | 0.2490 | 4.3677 | 0.3524 | 2.5873 | 0.0000 | 1.8903    | 0.5701 | 3.0841 | 0.5225 | 5.0128 | 0.8357 | 1.4596 | 0 |
| 504 | 594.8 | 2.4600 | 0.1971 | 3.1335 | 4.2983 | 0.0606 | 2.8545 | 0.2456 | 4.3598 | 0.3480 | 2.5861 | 0.0000 | 1.8971    | 0.5686 | 3.0827 | 0.5213 | 5.0092 | 0.8274 | 1.4595 | 0 |
| 505 | 593.6 | 2.4551 | 0.1973 | 3.1427 | 4.2930 | 0.0601 | 2.8523 | 0.2422 | 4.3521 | 0.3438 | 2.5850 | 0.0000 | 1.9039    | 0.5670 | 3.0813 | 0.5200 | 5.0056 | 0.8192 | 1.4595 | 0 |
| 506 | 592.5 | 2.4503 | 0.1975 | 3.1519 | 4.2878 | 0.0596 | 2.8502 | 0.2389 | 4.3444 | 0.3396 | 2.5838 | 0.0000 | 1.9107    | 0.5652 | 3.0799 | 0.5188 | 5.0020 | 0.8110 | 1.4594 | 0 |
| 507 | 591.3 | 2.4454 | 0.1977 | 3.1611 | 4.2827 | 0.0591 | 2.8480 | 0.2356 | 4.3369 | 0.3356 | 2.5827 | 0.0000 | 1.9174    | 0.5632 | 3.0785 | 0.5175 | 4.9984 | 0.8030 | 1.4594 | 0 |
| 508 | 590.1 | 2.4406 | 0.1979 | 3.1702 | 4.2776 | 0.0586 | 2.8458 | 0.2323 | 4.3294 | 0.3317 | 2.5815 | 0.0000 | 1.9240    | 0.5610 | 3.0772 | 0.5163 | 4.9947 | 0.7950 | 1.4593 | 0 |
| 509 | 589   | 2.4358 | 0.1982 | 3.1794 | 4.2726 | 0.0581 | 2.8436 | 0.2291 | 4.3220 | 0.3279 | 2.5804 | 0.0000 | 1.9305    | 0.5587 | 3.0759 | 0.5150 | 4.9910 | 0.7870 | 1.4593 | 0 |
| 510 | 587.8 | 2.4311 | 0.1984 | 3.1885 | 4.2676 | 0.0577 | 2.8414 | 0.2260 | 4.3147 | 0.3242 | 2.5793 | 0.0000 | 1.9369    | 0.5561 | 3.0747 | 0.5138 | 4.9873 | 0.7792 | 1.4592 | 0 |
| 511 | 586.7 | 2.4263 | 0.1986 | 3.1976 | 4.2627 | 0.0572 | 2.8392 | 0.2228 | 4.3075 | 0.3206 | 2.5782 | 0.0000 | 1.9432    | 0.5534 | 3.0735 | 0.5126 | 4.9836 | 0.7714 | 1.4592 | 0 |
| 512 | 585.5 | 2.4216 | 0.1988 | 3.2067 | 4.2578 | 0.0567 | 2.8370 | 0.2197 | 4.3004 | 0.3171 | 2.5771 | 0.0000 | 1.9494    | 0.5506 | 3.0723 | 0.5113 | 4.9799 | 0.7637 | 1.4591 | 0 |
| 513 | 584.4 | 2.4168 | 0.1990 | 3.2158 | 4.2530 | 0.0563 | 2.8348 | 0.2167 | 4.2933 | 0.3136 | 2.5760 | 0.0000 | 1.9555    | 0.5476 | 3.0712 | 0.5101 | 4.9761 | 0.7560 | 1.4591 | 0 |
| 514 | 583.3 | 2.4121 | 0.1993 | 3.2249 | 4.2482 | 0.0558 | 2.8326 | 0.2137 | 4.2864 | 0.3103 | 2.5750 | 0.0000 | 1.9615    | 0.5444 | 3.0700 | 0.5089 | 4.9724 | 0.7485 | 1.4590 | 0 |
| 515 | 582.1 | 2.4075 | 0.1995 | 3.2340 | 4.2435 | 0.0554 | 2.8304 | 0.2107 | 4.2795 | 0.3071 | 2.5739 | 0.0000 | 1.9673    | 0.5411 | 3.0690 | 0.5077 | 4.9686 | 0.7409 | 1.4589 | 0 |
| 516 | 581   | 2.4028 | 0.1997 | 3.2430 | 4.2389 | 0.0550 | 2.8282 | 0.2078 | 4.2727 | 0.3040 | 2.5729 | 0.0000 | 1.9730    | 0.5377 | 3.0679 | 0.5065 | 4.9648 | 0.7335 | 1.4589 | 0 |
| 517 | 579.9 | 2.3981 | 0.1999 | 3.2521 | 4.2343 | 0.0546 | 2.8260 | 0.2049 | 4.2660 | 0.3009 | 2.5718 | 0.0000 | 1.9786    | 0.5342 | 3.0669 | 0.5052 | 4.9610 | 0.7261 | 1.4588 | 0 |
| 518 | 578.8 | 2.3935 | 0.2001 | 3.2611 | 4.2297 | 0.0542 | 2.8237 | 0.2020 | 4.2593 | 0.2979 | 2.5708 | 0.0000 | 1.9840    | 0.5305 | 3.0658 | 0.5040 | 4.9571 | 0.7188 | 1.4588 | 0 |
| 519 | 577.6 | 2.3889 | 0.2004 | 3.2701 | 4.2252 | 0.0538 | 2.8215 | 0.1992 | 4.2528 | 0.2950 | 2.5698 | 0.0000 | 1.9893    | 0.5268 | 3.0649 | 0.5028 | 4.9533 | 0.7116 | 1.4587 | 0 |

| nm  | THz   | eV     | Ag     |        | cSi    |        | Fe2O3  |        | GaAs   |        | TiO2   |        | P3HT:PCBM |        | CdTe   |        | aSi    |        | SiO2   |   |
|-----|-------|--------|--------|--------|--------|--------|--------|--------|--------|--------|--------|--------|-----------|--------|--------|--------|--------|--------|--------|---|
|     |       |        | n      | k      | n      | k      | n      | k      | n      | k      | n      | k      | n         | k      | n      | k      | n      | k      | n      | k |
| 520 | 576.5 | 2.3843 | 0.2006 | 3.2791 | 4.2207 | 0.0534 | 2.8193 | 0.1965 | 4.2463 | 0.2922 | 2.5687 | 0.0000 | 1.9944    | 0.5230 | 3.0639 | 0.5016 | 4.9494 | 0.7044 | 1.4587 | 0 |
| 521 | 575.4 | 2.3797 | 0.2008 | 3.2881 | 4.2163 | 0.0530 | 2.8171 | 0.1937 | 4.2399 | 0.2894 | 2.5677 | 0.0000 | 1.9994    | 0.5190 | 3.0630 | 0.5003 | 4.9456 | 0.6973 | 1.4586 | 0 |
| 522 | 574.3 | 2.3752 | 0.2010 | 3.2971 | 4.2119 | 0.0526 | 2.8149 | 0.1910 | 4.2336 | 0.2868 | 2.5667 | 0.0000 | 2.0042    | 0.5151 | 3.0621 | 0.4991 | 4.9417 | 0.6903 | 1.4586 | 0 |
| 523 | 573.2 | 2.3706 | 0.2012 | 3.3061 | 4.2075 | 0.0522 | 2.8127 | 0.1883 | 4.2274 | 0.2842 | 2.5657 | 0.0000 | 2.0089    | 0.5110 | 3.0612 | 0.4979 | 4.9378 | 0.6833 | 1.4585 | 0 |
| 524 | 572.1 | 2.3661 | 0.2015 | 3.3151 | 4.2033 | 0.0519 | 2.8105 | 0.1857 | 4.2212 | 0.2816 | 2.5647 | 0.0000 | 2.0134    | 0.5069 | 3.0603 | 0.4966 | 4.9339 | 0.6764 | 1.4585 | 0 |
| 525 | 571   | 2.3616 | 0.2017 | 3.3240 | 4.1990 | 0.0515 | 2.8083 | 0.1831 | 4.2151 | 0.2791 | 2.5638 | 0.0000 | 2.0178    | 0.5028 | 3.0594 | 0.4954 | 4.9300 | 0.6695 | 1.4585 | 0 |
| 526 | 569.9 | 2.3571 | 0.2019 | 3.3329 | 4.1948 | 0.0511 | 2.8061 | 0.1805 | 4.2091 | 0.2767 | 2.5628 | 0.0000 | 2.0221    | 0.4986 | 3.0586 | 0.4941 | 4.9260 | 0.6627 | 1.4584 | 0 |
| 527 | 568.9 | 2.3526 | 0.2021 | 3.3419 | 4.1906 | 0.0508 | 2.8039 | 0.1780 | 4.2031 | 0.2744 | 2.5618 | 0.0000 | 2.0262    | 0.4945 | 3.0578 | 0.4929 | 4.9221 | 0.6560 | 1.4584 | 0 |
| 528 | 567.8 | 2.3482 | 0.2023 | 3.3508 | 4.1865 | 0.0504 | 2.8017 | 0.1755 | 4.1973 | 0.2721 | 2.5609 | 0.0000 | 2.0301    | 0.4902 | 3.0570 | 0.4916 | 4.9181 | 0.6494 | 1.4583 | 0 |
| 529 | 566.7 | 2.3437 | 0.2026 | 3.3597 | 4.1824 | 0.0501 | 2.7995 | 0.1730 | 4.1915 | 0.2699 | 2.5599 | 0.0000 | 2.0340    | 0.4860 | 3.0562 | 0.4904 | 4.9142 | 0.6428 | 1.4583 | 0 |
| 530 | 565.6 | 2.3393 | 0.2028 | 3.3686 | 4.1784 | 0.0498 | 2.7974 | 0.1706 | 4.1857 | 0.2677 | 2.5590 | 0.0000 | 2.0377    | 0.4818 | 3.0555 | 0.4891 | 4.9102 | 0.6362 | 1.4582 | 0 |
| 531 | 564.6 | 2.3349 | 0.2030 | 3.3775 | 4.1744 | 0.0494 | 2.7952 | 0.1682 | 4.1801 | 0.2656 | 2.5581 | 0.0000 | 2.0413    | 0.4776 | 3.0547 | 0.4878 | 4.9062 | 0.6298 | 1.4582 | 0 |
| 532 | 563.5 | 2.3305 | 0.2032 | 3.3864 | 4.1704 | 0.0491 | 2.7930 | 0.1659 | 4.1745 | 0.2635 | 2.5572 | 0.0000 | 2.0448    | 0.4734 | 3.0540 | 0.4865 | 4.9023 | 0.6234 | 1.4581 | 0 |
| 533 | 562.5 | 2.3262 | 0.2034 | 3.3952 | 4.1665 | 0.0488 | 2.7908 | 0.1635 | 4.1689 | 0.2615 | 2.5562 | 0.0000 | 2.0482    | 0.4692 | 3.0533 | 0.4853 | 4.8983 | 0.6170 | 1.4581 | 0 |
| 534 | 561.4 | 2.3218 | 0.2036 | 3.4041 | 4.1626 | 0.0485 | 2.7887 | 0.1612 | 4.1635 | 0.2595 | 2.5553 | 0.0000 | 2.0515    | 0.4650 | 3.0526 | 0.4840 | 4.8943 | 0.6108 | 1.4580 | 0 |
| 535 | 560.4 | 2.3175 | 0.2039 | 3.4129 | 4.1587 | 0.0482 | 2.7865 | 0.1589 | 4.1581 | 0.2576 | 2.5544 | 0.0000 | 2.0547    | 0.4609 | 3.0519 | 0.4827 | 4.8903 | 0.6045 | 1.4580 | 0 |
| 536 | 559.3 | 2.3131 | 0.2041 | 3.4218 | 4.1549 | 0.0479 | 2.7843 | 0.1567 | 4.1527 | 0.2557 | 2.5535 | 0.0000 | 2.0578    | 0.4567 | 3.0512 | 0.4814 | 4.8863 | 0.5984 | 1.4579 | 0 |
| 537 | 558.3 | 2.3088 | 0.2043 | 3.4306 | 4.1511 | 0.0476 | 2.7822 | 0.1545 | 4.1474 | 0.2539 | 2.5527 | 0.0000 | 2.0608    | 0.4527 | 3.0505 | 0.4801 | 4.8823 | 0.5923 | 1.4579 | 0 |
| 538 | 557.2 | 2.3045 | 0.2045 | 3.4394 | 4.1474 | 0.0473 | 2.7800 | 0.1523 | 4.1422 | 0.2521 | 2.5518 | 0.0000 | 2.0638    | 0.4486 | 3.0498 | 0.4787 | 4.8783 | 0.5862 | 1.4578 | 0 |
| 539 | 556.2 | 2.3003 | 0.2047 | 3.4482 | 4.1437 | 0.0470 | 2.7779 | 0.1502 | 4.1371 | 0.2504 | 2.5509 | 0.0000 | 2.0667    | 0.4445 | 3.0492 | 0.4774 | 4.8742 | 0.5802 | 1.4578 | 0 |
| 540 | 555.2 | 2.2960 | 0.2049 | 3.4570 | 4.1400 | 0.0467 | 2.7758 | 0.1480 | 4.1320 | 0.2487 | 2.5500 | 0.0000 | 2.0696    | 0.4405 | 3.0485 | 0.4761 | 4.8702 | 0.5743 | 1.4578 | 0 |
| 541 | 554.1 | 2.2918 | 0.2052 | 3.4658 | 4.1364 | 0.0464 | 2.7736 | 0.1459 | 4.1270 | 0.2470 | 2.5492 | 0.0000 | 2.0724    | 0.4366 | 3.0479 | 0.4747 | 4.8662 | 0.5684 | 1.4577 | 0 |
| 542 | 553.1 | 2.2875 | 0.2054 | 3.4746 | 4.1328 | 0.0461 | 2.7715 | 0.1439 | 4.1220 | 0.2454 | 2.5483 | 0.0000 | 2.0752    | 0.4326 | 3.0473 | 0.4734 | 4.8622 | 0.5626 | 1.4577 | 0 |
| 543 | 552.1 | 2.2833 | 0.2056 | 3.4834 | 4.1292 | 0.0459 | 2.7694 | 0.1418 | 4.1171 | 0.2438 | 2.5475 | 0.0000 | 2.0780    | 0.4286 | 3.0466 | 0.4721 | 4.8581 | 0.5569 | 1.4576 | 0 |
| 544 | 551.1 | 2.2791 | 0.2058 | 3.4921 | 4.1256 | 0.0456 | 2.7673 | 0.1398 | 4.1122 | 0.2423 | 2.5466 | 0.0000 | 2.0808    | 0.4247 | 3.0460 | 0.4707 | 4.8541 | 0.5512 | 1.4576 | 0 |
| 545 | 550.1 | 2.2749 | 0.2060 | 3.5009 | 4.1221 | 0.0453 | 2.7652 | 0.1379 | 4.1074 | 0.2407 | 2.5458 | 0.0000 | 2.0836    | 0.4208 | 3.0454 | 0.4693 | 4.8501 | 0.5455 | 1.4575 | 0 |
| 546 | 549.1 | 2.2708 | 0.2062 | 3.5096 | 4.1187 | 0.0451 | 2.7631 | 0.1359 | 4.1027 | 0.2393 | 2.5450 | 0.0000 | 2.0863    | 0.4168 | 3.0448 | 0.4680 | 4.8460 | 0.5400 | 1.4575 | 0 |
| 547 | 548.1 | 2.2666 | 0.2064 | 3.5184 | 4.1152 | 0.0448 | 2.7610 | 0.1340 | 4.0980 | 0.2378 | 2.5442 | 0.0000 | 2.0891    | 0.4129 | 3.0442 | 0.4666 | 4.8420 | 0.5344 | 1.4575 | 0 |
| 548 | 547.1 | 2.2625 | 0.2067 | 3.5271 | 4.1118 | 0.0445 | 2.7589 | 0.1321 | 4.0933 | 0.2364 | 2.5434 | 0.0000 | 2.0919    | 0.4089 | 3.0436 | 0.4652 | 4.8380 | 0.5289 | 1.4574 | 0 |
| 549 | 546.1 | 2.2584 | 0.2069 | 3.5358 | 4.1084 | 0.0443 | 2.7568 | 0.1302 | 4.0887 | 0.2351 | 2.5426 | 0.0000 | 2.0947    | 0.4049 | 3.0429 | 0.4639 | 4.8339 | 0.5235 | 1.4574 | 0 |
| 550 | 545.1 | 2.2543 | 0.2071 | 3.5445 | 4.1051 | 0.0440 | 2.7548 | 0.1283 | 4.0842 | 0.2337 | 2.5418 | 0.0000 | 2.0975    | 0.4008 | 3.0423 | 0.4625 | 4.8299 | 0.5182 | 1.4573 | 0 |
| 551 | 544.1 | 2.2502 | 0.2073 | 3.5533 | 4.1017 | 0.0438 | 2.7527 | 0.1265 | 4.0797 | 0.2324 | 2.5410 | 0.0000 | 2.1003    | 0.3966 | 3.0417 | 0.4611 | 4.8259 | 0.5129 | 1.4573 | 0 |

| nm  | THz   | eV     | Ag     |        | cSi    |        | Fe2O3  |        | GaAs   |        | TiO2   |        | P3HT:PCBM |        | CdTe   |        | aSi    |        | SiO2   |   |
|-----|-------|--------|--------|--------|--------|--------|--------|--------|--------|--------|--------|--------|-----------|--------|--------|--------|--------|--------|--------|---|
|     |       |        | n      | k      | n      | k      | n      | k      | n      | k      | n      | k      | n         | k      | n      | k      | n      | k      | n      | k |
| 552 | 543.1 | 2.2461 | 0.2075 | 3.5619 | 4.0984 | 0.0436 | 2.7507 | 0.1247 | 4.0753 | 0.2311 | 2.5402 | 0.0000 | 2.1031    | 0.3924 | 3.0411 | 0.4597 | 4.8218 | 0.5076 | 1.4572 | 0 |
| 553 | 542.1 | 2.2420 | 0.2077 | 3.5706 | 4.0952 | 0.0433 | 2.7486 | 0.1229 | 4.0709 | 0.2299 | 2.5394 | 0.0000 | 2.1060    | 0.3881 | 3.0405 | 0.4583 | 4.8178 | 0.5024 | 1.4572 | 0 |
| 554 | 541.1 | 2.2380 | 0.2079 | 3.5793 | 4.0919 | 0.0431 | 2.7466 | 0.1212 | 4.0666 | 0.2287 | 2.5386 | 0.0000 | 2.1088    | 0.3837 | 3.0400 | 0.4569 | 4.8138 | 0.4972 | 1.4572 | 0 |
| 555 | 540.2 | 2.2339 | 0.2081 | 3.5880 | 4.0887 | 0.0429 | 2.7445 | 0.1195 | 4.0623 | 0.2275 | 2.5378 | 0.0000 | 2.1116    | 0.3791 | 3.0394 | 0.4555 | 4.8098 | 0.4921 | 1.4571 | 0 |
| 556 | 539.2 | 2.2299 | 0.2084 | 3.5966 | 4.0856 | 0.0426 | 2.7425 | 0.1178 | 4.0581 | 0.2263 | 2.5371 | 0.0000 | 2.1144    | 0.3744 | 3.0388 | 0.4541 | 4.8057 | 0.4871 | 1.4571 | 0 |
| 557 | 538.2 | 2.2259 | 0.2086 | 3.6053 | 4.0824 | 0.0424 | 2.7405 | 0.1161 | 4.0539 | 0.2252 | 2.5363 | 0.0000 | 2.1171    | 0.3695 | 3.0382 | 0.4527 | 4.8017 | 0.4821 | 1.4570 | 0 |
| 558 | 537.3 | 2.2219 | 0.2088 | 3.6140 | 4.0793 | 0.0422 | 2.7385 | 0.1144 | 4.0497 | 0.2240 | 2.5356 | 0.0000 | 2.1197    | 0.3645 | 3.0376 | 0.4513 | 4.7977 | 0.4771 | 1.4570 | 0 |
| 559 | 536.3 | 2.2180 | 0.2090 | 3.6226 | 4.0762 | 0.0420 | 2.7365 | 0.1128 | 4.0457 | 0.2229 | 2.5348 | 0.0000 | 2.1223    | 0.3592 | 3.0370 | 0.4499 | 4.7937 | 0.4722 | 1.4570 | 0 |
| 560 | 535.3 | 2.2140 | 0.2092 | 3.6312 | 4.0731 | 0.0417 | 2.7345 | 0.1112 | 4.0416 | 0.2219 | 2.5341 | 0.0000 | 2.1246    | 0.3538 | 3.0364 | 0.4485 | 4.7897 | 0.4674 | 1.4569 | 0 |
| 561 | 534.4 | 2.2101 | 0.2094 | 3.6399 | 4.0701 | 0.0415 | 2.7325 | 0.1096 | 4.0376 | 0.2208 | 2.5333 | 0.0000 | 2.1269    | 0.3483 | 3.0357 | 0.4471 | 4.7856 | 0.4626 | 1.4569 | 0 |
| 562 | 533.4 | 2.2061 | 0.2096 | 3.6485 | 4.0671 | 0.0413 | 2.7305 | 0.1080 | 4.0336 | 0.2198 | 2.5326 | 0.0000 | 2.1289    | 0.3425 | 3.0351 | 0.4457 | 4.7816 | 0.4579 | 1.4568 | 0 |
| 563 | 532.5 | 2.2022 | 0.2098 | 3.6571 | 4.0641 | 0.0411 | 2.7286 | 0.1065 | 4.0297 | 0.2188 | 2.5319 | 0.0000 | 2.1306    | 0.3366 | 3.0345 | 0.4443 | 4.7776 | 0.4532 | 1.4568 | 0 |
| 564 | 531.5 | 2.1983 | 0.2100 | 3.6657 | 4.0611 | 0.0409 | 2.7266 | 0.1050 | 4.0259 | 0.2178 | 2.5312 | 0.0000 | 2.1321    | 0.3306 | 3.0339 | 0.4428 | 4.7736 | 0.4485 | 1.4568 | 0 |
| 565 | 530.6 | 2.1944 | 0.2102 | 3.6743 | 4.0582 | 0.0407 | 2.7247 | 0.1034 | 4.0220 | 0.2169 | 2.5305 | 0.0000 | 2.1333    | 0.3245 | 3.0333 | 0.4414 | 4.7697 | 0.4439 | 1.4567 | 0 |
| 566 | 529.7 | 2.1905 | 0.2105 | 3.6829 | 4.0552 | 0.0405 | 2.7227 | 0.1020 | 4.0182 | 0.2159 | 2.5297 | 0.0000 | 2.1340    | 0.3184 | 3.0327 | 0.4400 | 4.7657 | 0.4394 | 1.4567 | 0 |
| 567 | 528.7 | 2.1867 | 0.2107 | 3.6915 | 4.0524 | 0.0403 | 2.7208 | 0.1005 | 4.0145 | 0.2150 | 2.5290 | 0.0000 | 2.1344    | 0.3123 | 3.0321 | 0.4386 | 4.7617 | 0.4348 | 1.4567 | 0 |
| 568 | 527.8 | 2.1828 | 0.2109 | 3.7000 | 4.0495 | 0.0401 | 2.7189 | 0.0991 | 4.0108 | 0.2141 | 2.5283 | 0.0000 | 2.1345    | 0.3064 | 3.0314 | 0.4372 | 4.7577 | 0.4304 | 1.4566 | 0 |
| 569 | 526.9 | 2.1790 | 0.2111 | 3.7086 | 4.0466 | 0.0399 | 2.7170 | 0.0976 | 4.0071 | 0.2132 | 2.5276 | 0.0000 | 2.1343    | 0.3006 | 3.0308 | 0.4358 | 4.7537 | 0.4260 | 1.4566 | 0 |
| 570 | 526   | 2.1752 | 0.2113 | 3.7172 | 4.0438 | 0.0397 | 2.7151 | 0.0962 | 4.0035 | 0.2124 | 2.5270 | 0.0000 | 2.1338    | 0.2951 | 3.0302 | 0.4344 | 4.7498 | 0.4216 | 1.4565 | 0 |
| 571 | 525   | 2.1714 | 0.2115 | 3.7257 | 4.0410 | 0.0395 | 2.7132 | 0.0948 | 3.9999 | 0.2115 | 2.5263 | 0.0000 | 2.1333    | 0.2898 | 3.0295 | 0.4330 | 4.7458 | 0.4173 | 1.4565 | 0 |
| 572 | 524.1 | 2.1676 | 0.2117 | 3.7343 | 4.0383 | 0.0394 | 2.7113 | 0.0935 | 3.9964 | 0.2107 | 2.5256 | 0.0000 | 2.1326    | 0.2847 | 3.0289 | 0.4316 | 4.7419 | 0.4130 | 1.4565 | 0 |
| 573 | 523.2 | 2.1638 | 0.2119 | 3.7428 | 4.0355 | 0.0392 | 2.7094 | 0.0921 | 3.9929 | 0.2099 | 2.5249 | 0.0000 | 2.1319    | 0.2797 | 3.0283 | 0.4302 | 4.7379 | 0.4088 | 1.4564 | 0 |
| 574 | 522.3 | 2.1600 | 0.2121 | 3.7513 | 4.0328 | 0.0390 | 2.7075 | 0.0908 | 3.9894 | 0.2091 | 2.5242 | 0.0000 | 2.1310    | 0.2747 | 3.0276 | 0.4288 | 4.7340 | 0.4046 | 1.4564 | 0 |
| 575 | 521.4 | 2.1562 | 0.2123 | 3.7599 | 4.0301 | 0.0388 | 2.7057 | 0.0895 | 3.9859 | 0.2083 | 2.5236 | 0.0000 | 2.1299    | 0.2698 | 3.0270 | 0.4274 | 4.7301 | 0.4004 | 1.4564 | 0 |
| 576 | 520.5 | 2.1525 | 0.2125 | 3.7684 | 4.0274 | 0.0386 | 2.7038 | 0.0882 | 3.9825 | 0.2076 | 2.5229 | 0.0000 | 2.1286    | 0.2651 | 3.0263 | 0.4260 | 4.7262 | 0.3963 | 1.4563 | 0 |
| 577 | 519.6 | 2.1488 | 0.2127 | 3.7769 | 4.0247 | 0.0385 | 2.7020 | 0.0869 | 3.9792 | 0.2068 | 2.5223 | 0.0000 | 2.1272    | 0.2606 | 3.0257 | 0.4246 | 4.7222 | 0.3923 | 1.4563 | 0 |
| 578 | 518.7 | 2.1451 | 0.2129 | 3.7854 | 4.0221 | 0.0383 | 2.7001 | 0.0857 | 3.9759 | 0.2061 | 2.5216 | 0.0000 | 2.1255    | 0.2564 | 3.0250 | 0.4232 | 4.7183 | 0.3883 | 1.4562 | 0 |
| 579 | 517.8 | 2.1414 | 0.2131 | 3.7939 | 4.0195 | 0.0381 | 2.6983 | 0.0844 | 3.9726 | 0.2054 | 2.5210 | 0.0000 | 2.1238    | 0.2524 | 3.0243 | 0.4218 | 4.7144 | 0.3843 | 1.4562 | 0 |
| 580 | 516.9 | 2.1377 | 0.2133 | 3.8024 | 4.0169 | 0.0380 | 2.6965 | 0.0832 | 3.9693 | 0.2047 | 2.5203 | 0.0000 | 2.1220    | 0.2487 | 3.0237 | 0.4204 | 4.7106 | 0.3804 | 1.4562 | 0 |
| 581 | 516   | 2.1340 | 0.2135 | 3.8109 | 4.0143 | 0.0378 | 2.6947 | 0.0820 | 3.9661 | 0.2040 | 2.5197 | 0.0000 | 2.1201    | 0.2453 | 3.0230 | 0.4191 | 4.7067 | 0.3765 | 1.4561 | 0 |
| 582 | 515.1 | 2.1303 | 0.2137 | 3.8194 | 4.0117 | 0.0376 | 2.6929 | 0.0808 | 3.9629 | 0.2033 | 2.5190 | 0.0000 | 2.1183    | 0.2421 | 3.0223 | 0.4177 | 4.7028 | 0.3726 | 1.4561 | 0 |
| 583 | 514.2 | 2.1267 | 0.2139 | 3.8279 | 4.0092 | 0.0375 | 2.6911 | 0.0796 | 3.9597 | 0.2027 | 2.5184 | 0.0000 | 2.1165    | 0.2393 | 3.0216 | 0.4163 | 4.6989 | 0.3688 | 1.4561 | 0 |

| nm  | THz   | eV     | Ag     |        | cSi    |        | Fe2O3  |        | GaAs   |        | TiO2   |        | P3HT:PCBM |        | CdTe   |        | aSi    |        | SiO2   |   |
|-----|-------|--------|--------|--------|--------|--------|--------|--------|--------|--------|--------|--------|-----------|--------|--------|--------|--------|--------|--------|---|
|     |       |        | n      | k      | n      | k      | n      | k      | n      | k      | n      | k      | n         | k      | n      | k      | n      | k      | n      | k |
| 584 | 513.3 | 2.1230 | 0.2141 | 3.8363 | 4.0067 | 0.0373 | 2.6893 | 0.0785 | 3.9566 | 0.2020 | 2.5178 | 0.0000 | 2.1147    | 0.2367 | 3.0209 | 0.4150 | 4.6951 | 0.3651 | 1.4560 | 0 |
| 585 | 512.5 | 2.1194 | 0.2143 | 3.8448 | 4.0042 | 0.0371 | 2.6875 | 0.0774 | 3.9535 | 0.2014 | 2.5172 | 0.0000 | 2.1131    | 0.2343 | 3.0202 | 0.4136 | 4.6913 | 0.3613 | 1.4560 | 0 |
| 586 | 511.6 | 2.1158 | 0.2145 | 3.8533 | 4.0017 | 0.0370 | 2.6858 | 0.0762 | 3.9504 | 0.2008 | 2.5166 | 0.0000 | 2.1115    | 0.2322 | 3.0195 | 0.4123 | 4.6874 | 0.3577 | 1.4560 | 0 |
| 587 | 510.7 | 2.1122 | 0.2147 | 3.8617 | 3.9992 | 0.0368 | 2.6840 | 0.0751 | 3.9474 | 0.2001 | 2.5159 | 0.0000 | 2.1101    | 0.2303 | 3.0188 | 0.4109 | 4.6836 | 0.3540 | 1.4559 | 0 |
| 588 | 509.9 | 2.1086 | 0.2149 | 3.8702 | 3.9968 | 0.0367 | 2.6823 | 0.0740 | 3.9444 | 0.1995 | 2.5153 | 0.0000 | 2.1089    | 0.2286 | 3.0181 | 0.4096 | 4.6798 | 0.3504 | 1.4559 | 0 |
| 589 | 509   | 2.1050 | 0.2151 | 3.8786 | 3.9944 | 0.0365 | 2.6805 | 0.0729 | 3.9414 | 0.1990 | 2.5147 | 0.0000 | 2.1079    | 0.2270 | 3.0174 | 0.4083 | 4.6760 | 0.3468 | 1.4559 | 0 |
| 590 | 508.1 | 2.1014 | 0.2153 | 3.8871 | 3.9920 | 0.0364 | 2.6788 | 0.0719 | 3.9385 | 0.1984 | 2.5141 | 0.0000 | 2.1071    | 0.2256 | 3.0167 | 0.4069 | 4.6722 | 0.3433 | 1.4558 | 0 |
| 591 | 507.3 | 2.0979 | 0.2155 | 3.8955 | 3.9896 | 0.0362 | 2.6771 | 0.0000 | 3.9356 | 0.1978 | 2.5135 | 0.0000 | 2.1065    | 0.2242 | 3.0160 | 0.4056 | 4.6684 | 0.3398 | 1.4558 | 0 |
| 592 | 506.4 | 2.0943 | 0.2157 | 3.9039 | 3.9872 | 0.0361 | 2.6754 | 0.0000 | 3.9327 | 0.1973 | 2.5129 | 0.0000 | 2.1061    | 0.2230 | 3.0153 | 0.4043 | 4.6646 | 0.3364 | 1.4558 | 0 |
| 593 | 505.6 | 2.0908 | 0.2159 | 3.9123 | 3.9849 | 0.0359 | 2.6737 | 0.0000 | 3.9299 | 0.1967 | 2.5124 | 0.0000 | 2.1059    | 0.2218 | 3.0146 | 0.4030 | 4.6609 | 0.3330 | 1.4557 | 0 |
| 594 | 504.7 | 2.0873 | 0.2161 | 3.9208 | 3.9825 | 0.0358 | 2.6720 | 0.0000 | 3.9270 | 0.1962 | 2.5118 | 0.0000 | 2.1060    | 0.2207 | 3.0138 | 0.4017 | 4.6571 | 0.3296 | 1.4557 | 0 |
| 595 | 503.9 | 2.0838 | 0.2163 | 3.9292 | 3.9802 | 0.0356 | 2.6703 | 0.0000 | 3.9242 | 0.1956 | 2.5112 | 0.0000 | 2.1063    | 0.2195 | 3.0131 | 0.4004 | 4.6534 | 0.3262 | 1.4557 | 0 |
| 596 | 503   | 2.0803 | 0.2165 | 3.9376 | 3.9779 | 0.0355 | 2.6686 | 0.0000 | 3.9215 | 0.1951 | 2.5106 | 0.0000 | 2.1069    | 0.2184 | 3.0124 | 0.3991 | 4.6497 | 0.3229 | 1.4556 | 0 |
| 597 | 502.2 | 2.0768 | 0.2167 | 3.9460 | 3.9756 | 0.0354 | 2.6670 | 0.0000 | 3.9187 | 0.1946 | 2.5100 | 0.0000 | 2.1077    | 0.2171 | 3.0116 | 0.3979 | 4.6459 | 0.3197 | 1.4556 | 0 |
| 598 | 501.3 | 2.0733 | 0.2169 | 3.9544 | 3.9734 | 0.0352 | 2.6653 | 0.0000 | 3.9160 | 0.1941 | 2.5095 | 0.0000 | 2.1087    | 0.2158 | 3.0109 | 0.3966 | 4.6422 | 0.3164 | 1.4556 | 0 |
| 599 | 500.5 | 2.0699 | 0.2171 | 3.9628 | 3.9711 | 0.0351 | 2.6637 | 0.0000 | 3.9133 | 0.1936 | 2.5089 | 0.0000 | 2.1099    | 0.2144 | 3.0102 | 0.3953 | 4.6385 | 0.3132 | 1.4555 | 0 |
| 600 | 499.7 | 2.0664 | 0.2173 | 3.9712 | 3.9689 | 0.0350 | 2.6620 | 0.0000 | 3.9107 | 0.1932 | 2.5084 | 0.0000 | 2.1114    | 0.2128 | 3.0094 | 0.3941 | 4.6348 | 0.3101 | 1.4555 | 0 |
| 601 | 498.8 | 2.0630 | 0.2175 | 3.9795 | 3.9667 | 0.0348 | 2.6604 | 0.0000 | 3.9080 | 0.1927 | 2.5078 | 0.0000 | 2.1131    | 0.2111 | 3.0087 | 0.3928 | 4.6312 | 0.3070 | 1.4555 | 0 |
| 602 | 498   | 2.0595 | 0.2177 | 3.9879 | 3.9645 | 0.0347 | 2.6588 | 0.0000 | 3.9054 | 0.1922 | 2.5072 | 0.0000 | 2.1149    | 0.2092 | 3.0079 | 0.3916 | 4.6275 | 0.3039 | 1.4554 | 0 |
| 603 | 497.2 | 2.0561 | 0.2179 | 3.9963 | 3.9623 | 0.0346 | 2.6572 | 0.0000 | 3.9029 | 0.1918 | 2.5067 | 0.0000 | 2.1169    | 0.2070 | 3.0072 | 0.3904 | 4.6239 | 0.3008 | 1.4554 | 0 |
| 604 | 496.3 | 2.0527 | 0.2181 | 4.0047 | 3.9602 | 0.0344 | 2.6556 | 0.0000 | 3.9003 | 0.1913 | 2.5061 | 0.0000 | 2.1190    | 0.2046 | 3.0064 | 0.3891 | 4.6202 | 0.2978 | 1.4554 | 0 |
| 605 | 495.5 | 2.0493 | 0.2183 | 4.0130 | 3.9580 | 0.0343 | 2.6540 | 0.0000 | 3.8978 | 0.1909 | 2.5056 | 0.0000 | 2.1212    | 0.2019 | 3.0056 | 0.3879 | 4.6166 | 0.2948 | 1.4553 | 0 |
| 606 | 494.7 | 2.0459 | 0.2185 | 4.0214 | 3.9559 | 0.0342 | 2.6524 | 0.0000 | 3.8953 | 0.1904 | 2.5051 | 0.0000 | 2.1235    | 0.1990 | 3.0049 | 0.3867 | 4.6130 | 0.2918 | 1.4553 | 0 |
| 607 | 493.9 | 2.0426 | 0.2187 | 4.0297 | 3.9538 | 0.0340 | 2.6508 | 0.0000 | 3.8928 | 0.1900 | 2.5045 | 0.0000 | 2.1258    | 0.1957 | 3.0041 | 0.3855 | 4.6094 | 0.2889 | 1.4553 | 0 |
| 608 | 493.1 | 2.0392 | 0.2189 | 4.0381 | 3.9517 | 0.0339 | 2.6493 | 0.0000 | 3.8903 | 0.1896 | 2.5040 | 0.0000 | 2.1282    | 0.1921 | 3.0034 | 0.3843 | 4.6058 | 0.2860 | 1.4553 | 0 |
| 609 | 492.3 | 2.0359 | 0.2190 | 4.0464 | 3.9496 | 0.0338 | 2.6477 | 0.0000 | 3.8879 | 0.1892 | 2.5035 | 0.0000 | 2.1304    | 0.1882 | 3.0026 | 0.3831 | 4.6022 | 0.2831 | 1.4552 | 0 |
| 610 | 491.5 | 2.0325 | 0.2192 | 4.0547 | 3.9475 | 0.0337 | 2.6461 | 0.0000 | 3.8855 | 0.1888 | 2.5029 | 0.0000 | 2.1326    | 0.1840 | 3.0018 | 0.3820 | 4.5986 | 0.2803 | 1.4552 | 0 |
| 611 | 490.7 | 2.0292 | 0.2194 | 4.0631 | 3.9455 | 0.0336 | 2.6446 | 0.0000 | 3.8831 | 0.1884 | 2.5024 | 0.0000 | 2.1347    | 0.1794 | 3.0010 | 0.3808 | 4.5951 | 0.2775 | 1.4552 | 0 |
| 612 | 489.9 | 2.0259 | 0.2196 | 4.0714 | 3.9434 | 0.0334 | 2.6431 | 0.0000 | 3.8807 | 0.1880 | 2.5019 | 0.0000 | 2.1366    | 0.1746 | 3.0003 | 0.3796 | 4.5916 | 0.2747 | 1.4551 | 0 |
| 613 | 489.1 | 2.0226 | 0.2198 | 4.0797 | 3.9414 | 0.0333 | 2.6416 | 0.0000 | 3.8784 | 0.1876 | 2.5014 | 0.0000 | 2.1382    | 0.1695 | 2.9995 | 0.3785 | 4.5880 | 0.2720 | 1.4551 | 0 |
| 614 | 488.3 | 2.0193 | 0.2200 | 4.0880 | 3.9394 | 0.0332 | 2.6400 | 0.0000 | 3.8760 | 0.1872 | 2.5009 | 0.0000 | 2.1397    | 0.1641 | 2.9987 | 0.3773 | 4.5845 | 0.2693 | 1.4551 | 0 |
| 615 | 487.5 | 2.0160 | 0.2202 | 4.0964 | 3.9374 | 0.0331 | 2.6385 | 0.0000 | 3.8737 | 0.1869 | 2.5004 | 0.0000 | 2.1408    | 0.1585 | 2.9979 | 0.3762 | 4.5810 | 0.2666 | 1.4550 | 0 |

| nm  | THz   | eV     | Ag     |        | cSi    |        | Fe2O3  |        | GaAs   |        | TiO2   |        | P3HT:PCBM |        | CdTe   |        | aSi    |        | SiO2   |   |
|-----|-------|--------|--------|--------|--------|--------|--------|--------|--------|--------|--------|--------|-----------|--------|--------|--------|--------|--------|--------|---|
|     |       |        | n      | k      | n      | k      | n      | k      | n      | k      | n      | k      | n         | k      | n      | k      | n      | k      | n      | k |
| 616 | 486.7 | 2.0127 | 0.2204 | 4.1047 | 3.9354 | 0.0330 | 2.6370 | 0.0000 | 3.8714 | 0.1865 | 2.4999 | 0.0000 | 2.1416    | 0.1528 | 2.9972 | 0.3751 | 4.5775 | 0.2640 | 1.4550 | 0 |
| 617 | 485.9 | 2.0095 | 0.2206 | 4.1130 | 3.9334 | 0.0329 | 2.6355 | 0.0000 | 3.8692 | 0.1861 | 2.4994 | 0.0000 | 2.1421    | 0.1468 | 2.9964 | 0.3740 | 4.5740 | 0.2613 | 1.4550 | 0 |
| 618 | 485.1 | 2.0062 | 0.2208 | 4.1213 | 3.9315 | 0.0327 | 2.6341 | 0.0000 | 3.8669 | 0.1858 | 2.4989 | 0.0000 | 2.1423    | 0.1408 | 2.9956 | 0.3728 | 4.5706 | 0.2588 | 1.4550 | 0 |
| 619 | 484.3 | 2.0030 | 0.2210 | 4.1296 | 3.9295 | 0.0326 | 2.6326 | 0.0000 | 3.8647 | 0.1854 | 2.4984 | 0.0000 | 2.1421    | 0.1347 | 2.9948 | 0.3717 | 4.5671 | 0.2562 | 1.4549 | 0 |
| 620 | 483.5 | 1.9997 | 0.2211 | 4.1379 | 3.9276 | 0.0325 | 2.6311 | 0.0000 | 3.8625 | 0.1851 | 2.4979 | 0.0000 | 2.1416    | 0.1286 | 2.9940 | 0.3707 | 4.5637 | 0.2537 | 1.4549 | 0 |
| 621 | 482.8 | 1.9965 | 0.2213 | 4.1462 | 3.9257 | 0.0324 | 2.6297 | 0.0000 | 3.8604 | 0.1848 | 2.4974 | 0.0000 | 2.1407    | 0.1225 | 2.9933 | 0.3696 | 4.5603 | 0.2512 | 1.4549 | 0 |
| 622 | 482   | 1.9933 | 0.2215 | 4.1544 | 3.9238 | 0.0323 | 2.6282 | 0.0000 | 3.8582 | 0.1844 | 2.4969 | 0.0000 | 2.1395    | 0.1165 | 2.9925 | 0.3685 | 4.5569 | 0.2487 | 1.4548 | 0 |
| 623 | 481.2 | 1.9901 | 0.2217 | 4.1627 | 3.9219 | 0.0322 | 2.6268 | 0.0000 | 3.8561 | 0.1841 | 2.4964 | 0.0000 | 2.1379    | 0.1105 | 2.9917 | 0.3674 | 4.5535 | 0.2462 | 1.4548 | 0 |
| 624 | 480.4 | 1.9869 | 0.2219 | 4.1710 | 3.9200 | 0.0321 | 2.6253 | 0.0000 | 3.8539 | 0.1838 | 2.4959 | 0.0000 | 2.1361    | 0.1047 | 2.9909 | 0.3664 | 4.5501 | 0.2438 | 1.4548 | 0 |
| 625 | 479.7 | 1.9837 | 0.2221 | 4.1793 | 3.9182 | 0.0320 | 2.6239 | 0.0000 | 3.8518 | 0.1835 | 2.4954 | 0.0000 | 2.1340    | 0.0990 | 2.9901 | 0.3653 | 4.5467 | 0.2414 | 1.4548 | 0 |
| 626 | 478.9 | 1.9806 | 0.2223 | 4.1875 | 3.9163 | 0.0319 | 2.6225 | 0.0000 | 3.8498 | 0.1831 | 2.4950 | 0.0000 | 2.1316    | 0.0935 | 2.9893 | 0.3643 | 4.5433 | 0.2391 | 1.4547 | 0 |
| 627 | 478.1 | 1.9774 | 0.2225 | 4.1958 | 3.9145 | 0.0318 | 2.6211 | 0.0000 | 3.8477 | 0.1828 | 2.4945 | 0.0000 | 2.1290    | 0.0882 | 2.9886 | 0.3632 | 4.5400 | 0.2367 | 1.4547 | 0 |
| 628 | 477.4 | 1.9743 | 0.2226 | 4.2041 | 3.9127 | 0.0317 | 2.6197 | 0.0000 | 3.8457 | 0.1825 | 2.4940 | 0.0000 | 2.1261    | 0.0831 | 2.9878 | 0.3622 | 4.5367 | 0.2344 | 1.4547 | 0 |
| 629 | 476.6 | 1.9711 | 0.2228 | 4.2123 | 3.9109 | 0.0316 | 2.6183 | 0.0000 | 3.8436 | 0.1822 | 2.4936 | 0.0000 | 2.1231    | 0.0781 | 2.9870 | 0.3612 | 4.5333 | 0.2321 | 1.4546 | 0 |
| 630 | 475.9 | 1.9680 | 0.2230 | 4.2206 | 3.9091 | 0.0315 | 2.6169 | 0.0000 | 3.8416 | 0.1819 | 2.4931 | 0.0000 | 2.1199    | 0.0734 | 2.9862 | 0.3602 | 4.5300 | 0.2299 | 1.4546 | 0 |
| 631 | 475.1 | 1.9649 | 0.2232 | 4.2288 | 3.9073 | 0.0314 | 2.6155 | 0.0000 | 3.8396 | 0.1816 | 2.4926 | 0.0000 | 2.1166    | 0.0690 | 2.9854 | 0.3592 | 4.5267 | 0.2276 | 1.4546 | 0 |
| 632 | 474.4 | 1.9618 | 0.2234 | 4.2371 | 3.9055 | 0.0313 | 2.6142 | 0.0000 | 3.8377 | 0.1814 | 2.4922 | 0.0000 | 2.1132    | 0.0647 | 2.9846 | 0.3582 | 4.5235 | 0.2254 | 1.4546 | 0 |
| 633 | 473.6 | 1.9587 | 0.2236 | 4.2453 | 3.9037 | 0.0312 | 2.6128 | 0.0000 | 3.8357 | 0.1811 | 2.4917 | 0.0000 | 2.1097    | 0.0607 | 2.9838 | 0.3572 | 4.5202 | 0.2232 | 1.4545 | 0 |
| 634 | 472.9 | 1.9556 | 0.2237 | 4.2535 | 3.9020 | 0.0311 | 2.6115 | 0.0000 | 3.8338 | 0.1808 | 2.4913 | 0.0000 | 2.1061    | 0.0569 | 2.9831 | 0.3562 | 4.5169 | 0.2211 | 1.4545 | 0 |
| 635 | 472.1 | 1.9525 | 0.2239 | 4.2618 | 3.9002 | 0.0310 | 2.6101 | 0.0000 | 3.8319 | 0.1805 | 2.4908 | 0.0000 | 2.1025    | 0.0532 | 2.9823 | 0.3553 | 4.5137 | 0.2189 | 1.4545 | 0 |
| 636 | 471.4 | 1.9494 | 0.2241 | 4.2700 | 3.8985 | 0.0309 | 2.6088 | 0.0000 | 3.8300 | 0.1803 | 2.4904 | 0.0000 | 2.0988    | 0.0499 | 2.9815 | 0.3543 | 4.5105 | 0.2168 | 1.4545 | 0 |
| 637 | 470.6 | 1.9464 | 0.2243 | 4.2782 | 3.8968 | 0.0308 | 2.6075 | 0.0000 | 3.8281 | 0.1800 | 2.4899 | 0.0000 | 2.0951    | 0.0467 | 2.9807 | 0.3534 | 4.5073 | 0.2147 | 1.4544 | 0 |
| 638 | 469.9 | 1.9433 | 0.2245 | 4.2865 | 3.8951 | 0.0307 | 2.6061 | 0.0000 | 3.8262 | 0.1797 | 2.4895 | 0.0000 | 2.0913    | 0.0437 | 2.9799 | 0.3524 | 4.5041 | 0.2127 | 1.4544 | 0 |
| 639 | 469.2 | 1.9403 | 0.2247 | 4.2947 | 3.8934 | 0.0306 | 2.6048 | 0.0000 | 3.8244 | 0.1795 | 2.4890 | 0.0000 | 2.0876    | 0.0408 | 2.9792 | 0.3515 | 4.5009 | 0.2106 | 1.4544 | 0 |
| 640 | 468.4 | 1.9373 | 0.2248 | 4.3029 | 3.8917 | 0.0305 | 2.6035 | 0.0000 | 3.8225 | 0.1792 | 2.4886 | 0.0000 | 2.0839    | 0.0382 | 2.9784 | 0.3505 | 4.4977 | 0.2086 | 1.4543 | 0 |
| 641 | 467.7 | 1.9342 | 0.2250 | 4.3111 | 3.8900 | 0.0304 | 2.6022 | 0.0000 | 3.8207 | 0.1790 | 2.4882 | 0.0000 | 2.0802    | 0.0357 | 2.9776 | 0.3496 | 4.4945 | 0.2066 | 1.4543 | 0 |
| 642 | 467   | 1.9312 | 0.2252 | 4.3193 | 3.8884 | 0.0303 | 2.6009 | 0.0000 | 3.8189 | 0.1787 | 2.4877 | 0.0000 | 2.0766    | 0.0334 | 2.9768 | 0.3487 | 4.4914 | 0.2046 | 1.4543 | 0 |
| 643 | 466.2 | 1.9282 | 0.2254 | 4.3275 | 3.8867 | 0.0302 | 2.5996 | 0.0000 | 3.8171 | 0.1785 | 2.4873 | 0.0000 | 2.0729    | 0.0313 | 2.9760 | 0.3478 | 4.4883 | 0.2027 | 1.4543 | 0 |
| 644 | 465.5 | 1.9252 | 0.2256 | 4.3357 | 3.8851 | 0.0301 | 2.5984 | 0.0000 | 3.8153 | 0.1782 | 2.4869 | 0.0000 | 2.0694    | 0.0293 | 2.9753 | 0.3469 | 4.4852 | 0.2008 | 1.4542 | 0 |
| 645 | 464.8 | 1.9222 | 0.2258 | 4.3439 | 3.8835 | 0.0300 | 2.5971 | 0.0000 | 3.8136 | 0.1780 | 2.4865 | 0.0000 | 2.0658    | 0.0274 | 2.9745 | 0.3460 | 4.4820 | 0.1989 | 1.4542 | 0 |
| 646 | 464.1 | 1.9193 | 0.2259 | 4.3521 | 3.8818 | 0.0299 | 2.5958 | 0.0000 | 3.8118 | 0.1777 | 2.4860 | 0.0000 | 2.0623    | 0.0257 | 2.9737 | 0.3451 | 4.4790 | 0.1970 | 1.4542 | 0 |
| 647 | 463.4 | 1.9163 | 0.2261 | 4.3603 | 3.8802 | 0.0299 | 2.5946 | 0.0000 | 3.8101 | 0.1775 | 2.4856 | 0.0000 | 2.0589    | 0.0240 | 2.9729 | 0.3443 | 4.4759 | 0.1951 | 1.4542 | 0 |

| nm  | THz   | eV     | Ag     |        | cSi    |        | Fe2O3  |        | GaAs   |        | TiO2   |        | P3HT:PCBM |        | CdTe   |        | aSi    |        | SiO2   |   |
|-----|-------|--------|--------|--------|--------|--------|--------|--------|--------|--------|--------|--------|-----------|--------|--------|--------|--------|--------|--------|---|
|     |       |        | n      | k      | n      | k      | n      | k      | n      | k      | n      | k      | n         | k      | n      | k      | n      | k      | n      | k |
| 648 | 462.6 | 1.9133 | 0.2263 | 4.3685 | 3.8786 | 0.0298 | 2.5933 | 0.0000 | 3.8084 | 0.1773 | 2.4852 | 0.0000 | 2.0555    | 0.0225 | 2.9722 | 0.3434 | 4.4728 | 0.1933 | 1.4541 | 0 |
| 649 | 461.9 | 1.9104 | 0.2265 | 4.3767 | 3.8771 | 0.0297 | 2.5921 | 0.0000 | 3.8067 | 0.1770 | 2.4848 | 0.0000 | 2.0522    | 0.0211 | 2.9714 | 0.3425 | 4.4698 | 0.1915 | 1.4541 | 0 |
| 650 | 461.2 | 1.9074 | 0.2267 | 4.3849 | 3.8755 | 0.0296 | 2.5909 | 0.0000 | 3.8050 | 0.1768 | 2.4844 | 0.0000 | 2.0490    | 0.0198 | 2.9706 | 0.3417 | 4.4667 | 0.1897 | 1.4541 | 0 |
| 651 | 460.5 | 1.9045 | 0.2268 | 4.3930 | 3.8739 | 0.0295 | 2.5896 | 0.0000 | 3.8033 | 0.1766 | 2.4840 | 0.0000 | 2.0458    | 0.0186 | 2.9699 | 0.3409 | 4.4637 | 0.1879 | 1.4541 | 0 |
| 652 | 459.8 | 1.9016 | 0.2270 | 4.4012 | 3.8724 | 0.0294 | 2.5884 | 0.0000 | 3.8017 | 0.1764 | 2.4836 | 0.0000 | 2.0426    | 0.0174 | 2.9691 | 0.3400 | 4.4607 | 0.1861 | 1.4540 | 0 |
| 653 | 459.1 | 1.8987 | 0.2272 | 4.4094 | 3.8708 | 0.0293 | 2.5872 | 0.0000 | 3.8000 | 0.1762 | 2.4832 | 0.0000 | 2.0395    | 0.0164 | 2.9683 | 0.3392 | 4.4577 | 0.1844 | 1.4540 | 0 |
| 654 | 458.4 | 1.8958 | 0.2274 | 4.4175 | 3.8693 | 0.0293 | 2.5860 | 0.0000 | 3.7984 | 0.1759 | 2.4828 | 0.0000 | 2.0365    | 0.0154 | 2.9676 | 0.3384 | 4.4547 | 0.1827 | 1.4540 | 0 |
| 655 | 457.7 | 1.8929 | 0.2275 | 4.4257 | 3.8677 | 0.0292 | 2.5848 | 0.0000 | 3.7968 | 0.1757 | 2.4824 | 0.0000 | 2.0336    | 0.0145 | 2.9668 | 0.3376 | 4.4517 | 0.1810 | 1.4540 | 0 |
| 656 | 457   | 1.8900 | 0.2277 | 4.4339 | 3.8662 | 0.0291 | 2.5836 | 0.0000 | 3.7952 | 0.1755 | 2.4820 | 0.0000 | 2.0307    | 0.0137 | 2.9660 | 0.3367 | 4.4488 | 0.1793 | 1.4539 | 0 |
| 657 | 456.3 | 1.8871 | 0.2279 | 4.4420 | 3.8647 | 0.0290 | 2.5825 | 0.0000 | 3.7936 | 0.1753 | 2.4816 | 0.0000 | 2.0279    | 0.0129 | 2.9653 | 0.3360 | 4.4459 | 0.1776 | 1.4539 | 0 |
| 658 | 455.6 | 1.8843 | 0.2281 | 4.4502 | 3.8632 | 0.0289 | 2.5813 | 0.0000 | 3.7920 | 0.1751 | 2.4812 | 0.0000 | 2.0251    | 0.0121 | 2.9645 | 0.3352 | 4.4429 | 0.1760 | 1.4539 | 0 |
| 659 | 454.9 | 1.8814 | 0.2283 | 4.4583 | 3.8617 | 0.0288 | 2.5801 | 0.0000 | 3.7905 | 0.1749 | 2.4808 | 0.0000 | 2.0224    | 0.0115 | 2.9638 | 0.3344 | 4.4400 | 0.1744 | 1.4539 | 0 |
| 660 | 454.2 | 1.8785 | 0.2284 | 4.4665 | 3.8602 | 0.0288 | 2.5789 | 0.0000 | 3.7889 | 0.1747 | 2.4804 | 0.0000 | 2.0197    | 0.0108 | 2.9630 | 0.3336 | 4.4371 | 0.1728 | 1.4539 | 0 |
| 661 | 453.5 | 1.8757 | 0.2286 | 4.4746 | 3.8588 | 0.0287 | 2.5778 | 0.0000 | 3.7874 | 0.1745 | 2.4800 | 0.0000 | 2.0171    | 0.0102 | 2.9623 | 0.3328 | 4.4342 | 0.1712 | 1.4538 | 0 |
| 662 | 452.9 | 1.8729 | 0.2288 | 4.4828 | 3.8573 | 0.0286 | 2.5766 | 0.0000 | 3.7859 | 0.1743 | 2.4796 | 0.0000 | 2.0146    | 0.0097 | 2.9615 | 0.3321 | 4.4313 | 0.1696 | 1.4538 | 0 |
| 663 | 452.2 | 1.8700 | 0.2290 | 4.4909 | 3.8559 | 0.0285 | 2.5755 | 0.0000 | 3.7843 | 0.1741 | 2.4792 | 0.0000 | 2.0121    | 0.0092 | 2.9608 | 0.3313 | 4.4285 | 0.1681 | 1.4538 | 0 |
| 664 | 451.5 | 1.8672 | 0.2291 | 4.4991 | 3.8544 | 0.0285 | 2.5744 | 0.0000 | 3.7828 | 0.1739 | 2.4789 | 0.0000 | 2.0096    | 0.0087 | 2.9600 | 0.3306 | 4.4256 | 0.1666 | 1.4538 | 0 |
| 665 | 450.8 | 1.8644 | 0.2293 | 4.5072 | 3.8530 | 0.0284 | 2.5732 | 0.0000 | 3.7814 | 0.1737 | 2.4785 | 0.0000 | 2.0072    | 0.0083 | 2.9593 | 0.3298 | 4.4228 | 0.1650 | 1.4537 | 0 |
| 666 | 450.1 | 1.8616 | 0.2295 | 4.5153 | 3.8516 | 0.0283 | 2.5721 | 0.0000 | 3.7799 | 0.1735 | 2.4781 | 0.0000 | 2.0049    | 0.0079 | 2.9585 | 0.3291 | 4.4200 | 0.1636 | 1.4537 | 0 |
| 667 | 449.5 | 1.8588 | 0.2297 | 4.5235 | 3.8501 | 0.0282 | 2.5710 | 0.0000 | 3.7784 | 0.1734 | 2.4777 | 0.0000 | 2.0026    | 0.0075 | 2.9578 | 0.3283 | 4.4172 | 0.1621 | 1.4537 | 0 |
| 668 | 448.8 | 1.8561 | 0.2298 | 4.5316 | 3.8487 | 0.0282 | 2.5699 | 0.0000 | 3.7770 | 0.1732 | 2.4774 | 0.0000 | 2.0004    | 0.0072 | 2.9571 | 0.3276 | 4.4144 | 0.1606 | 1.4537 | 0 |
| 669 | 448.1 | 1.8533 | 0.2300 | 4.5397 | 3.8473 | 0.0281 | 2.5688 | 0.0000 | 3.7755 | 0.1730 | 2.4770 | 0.0000 | 1.9982    | 0.0068 | 2.9563 | 0.3269 | 4.4116 | 0.1592 | 1.4536 | 0 |
| 670 | 447.5 | 1.8505 | 0.2302 | 4.5478 | 3.8459 | 0.0280 | 2.5677 | 0.0000 | 3.7741 | 0.1728 | 2.4766 | 0.0000 | 1.9960    | 0.0000 | 2.9556 | 0.3262 | 4.4088 | 0.1578 | 1.4536 | 0 |
| 671 | 446.8 | 1.8478 | 0.2304 | 4.5559 | 3.8446 | 0.0279 | 2.5666 | 0.0000 | 3.7727 | 0.1726 | 2.4762 | 0.0000 | 1.9939    | 0.0000 | 2.9549 | 0.3255 | 4.4061 | 0.1563 | 1.4536 | 0 |
| 672 | 446.1 | 1.8450 | 0.2305 | 4.5641 | 3.8432 | 0.0279 | 2.5655 | 0.0000 | 3.7713 | 0.1725 | 2.4759 | 0.0000 | 1.9919    | 0.0000 | 2.9542 | 0.3248 | 4.4033 | 0.1549 | 1.4536 | 0 |
| 673 | 445.5 | 1.8423 | 0.2307 | 4.5722 | 3.8418 | 0.0278 | 2.5644 | 0.0000 | 3.7699 | 0.1723 | 2.4755 | 0.0000 | 1.9898    | 0.0000 | 2.9534 | 0.3241 | 4.4006 | 0.1536 | 1.4536 | 0 |
| 674 | 444.8 | 1.8395 | 0.2309 | 4.5803 | 3.8405 | 0.0277 | 2.5634 | 0.0000 | 3.7685 | 0.1721 | 2.4752 | 0.0000 | 1.9879    | 0.0000 | 2.9527 | 0.3234 | 4.3979 | 0.1522 | 1.4535 | 0 |
| 675 | 444.1 | 1.8368 | 0.2311 | 4.5884 | 3.8391 | 0.0276 | 2.5623 | 0.0000 | 3.7671 | 0.1719 | 2.4748 | 0.0000 | 1.9859    | 0.0000 | 2.9520 | 0.3227 | 4.3952 | 0.1509 | 1.4535 | 0 |
| 676 | 443.5 | 1.8341 | 0.2312 | 4.5965 | 3.8378 | 0.0276 | 2.5613 | 0.0000 | 3.7658 | 0.1718 | 2.4744 | 0.0000 | 1.9840    | 0.0000 | 2.9513 | 0.3220 | 4.3925 | 0.1495 | 1.4535 | 0 |
| 677 | 442.8 | 1.8314 | 0.2314 | 4.6046 | 3.8364 | 0.0275 | 2.5602 | 0.0000 | 3.7644 | 0.1716 | 2.4741 | 0.0000 | 1.9821    | 0.0000 | 2.9505 | 0.3214 | 4.3898 | 0.1482 | 1.4535 | 0 |
| 678 | 442.2 | 1.8287 | 0.2316 | 4.6127 | 3.8351 | 0.0274 | 2.5592 | 0.0000 | 3.7631 | 0.1714 | 2.4737 | 0.0000 | 1.9803    | 0.0000 | 2.9498 | 0.3207 | 4.3871 | 0.1469 | 1.4534 | 0 |
| 679 | 441.5 | 1.8260 | 0.2318 | 4.6208 | 3.8338 | 0.0274 | 2.5581 | 0.0000 | 3.7617 | 0.1713 | 2.4734 | 0.0000 | 1.9785    | 0.0000 | 2.9491 | 0.3201 | 4.3845 | 0.1456 | 1.4534 | 0 |

| nm  | THz   | eV     | Ag     |        | cSi    |        | Fe2O3  |        | GaAs   |        | TiO2   |        | P3HT:PCBM |        | CdTe   |        | aSi    |        | SiO2   |   |
|-----|-------|--------|--------|--------|--------|--------|--------|--------|--------|--------|--------|--------|-----------|--------|--------|--------|--------|--------|--------|---|
|     |       |        | n      | k      | n      | k      | n      | k      | n      | k      | n      | k      | n         | k      | n      | k      | n      | k      | n      | k |
| 680 | 440.9 | 1.8233 | 0.2319 | 4.6289 | 3.8325 | 0.0273 | 2.5571 | 0.0000 | 3.7604 | 0.1711 | 2.4730 | 0.0000 | 1.9767    | 0.0000 | 2.9484 | 0.3194 | 4.3818 | 0.1444 | 1.4534 | 0 |
| 681 | 440.2 | 1.8206 | 0.2321 | 4.6370 | 3.8312 | 0.0272 | 2.5561 | 0.0000 | 3.7591 | 0.1709 | 2.4727 | 0.0000 | 1.9750    | 0.0000 | 2.9477 | 0.3188 | 4.3792 | 0.1431 | 1.4534 | 0 |
| 682 | 439.6 | 1.8180 | 0.2323 | 4.6451 | 3.8299 | 0.0272 | 2.5550 | 0.0000 | 3.7578 | 0.1708 | 2.4724 | 0.0000 | 1.9733    | 0.0000 | 2.9470 | 0.3181 | 4.3766 | 0.1419 | 1.4534 | 0 |
| 683 | 438.9 | 1.8153 | 0.2324 | 4.6531 | 3.8286 | 0.0271 | 2.5540 | 0.0000 | 3.7565 | 0.1706 | 2.4720 | 0.0000 | 1.9717    | 0.0000 | 2.9463 | 0.3175 | 4.3740 | 0.1407 | 1.4533 | 0 |
| 684 | 438.3 | 1.8126 | 0.2326 | 4.6612 | 3.8273 | 0.0270 | 2.5530 | 0.0000 | 3.7553 | 0.1705 | 2.4717 | 0.0000 | 1.9700    | 0.0000 | 2.9456 | 0.3169 | 4.3714 | 0.1394 | 1.4533 | 0 |
| 685 | 437.7 | 1.8100 | 0.2328 | 4.6693 | 3.8260 | 0.0269 | 2.5520 | 0.0000 | 3.7540 | 0.1703 | 2.4713 | 0.0000 | 1.9684    | 0.0000 | 2.9449 | 0.3163 | 4.3688 | 0.1383 | 1.4533 | 0 |
| 686 | 437   | 1.8073 | 0.2329 | 4.6774 | 3.8248 | 0.0269 | 2.5510 | 0.0000 | 3.7527 | 0.1702 | 2.4710 | 0.0000 | 1.9668    | 0.0000 | 2.9442 | 0.3156 | 4.3663 | 0.1371 | 1.4533 | 0 |
| 687 | 436.4 | 1.8047 | 0.2331 | 4.6855 | 3.8235 | 0.0268 | 2.5500 | 0.0000 | 3.7515 | 0.1700 | 2.4707 | 0.0000 | 1.9653    | 0.0000 | 2.9435 | 0.3150 | 4.3637 | 0.1359 | 1.4533 | 0 |
| 688 | 435.7 | 1.8021 | 0.2333 | 4.6935 | 3.8223 | 0.0267 | 2.5490 | 0.0000 | 3.7502 | 0.1698 | 2.4703 | 0.0000 | 1.9637    | 0.0000 | 2.9428 | 0.3144 | 4.3612 | 0.1347 | 1.4532 | 0 |
| 689 | 435.1 | 1.7995 | 0.2335 | 4.7016 | 3.8210 | 0.0267 | 2.5481 | 0.0000 | 3.7490 | 0.1697 | 2.4700 | 0.0000 | 1.9622    | 0.0000 | 2.9422 | 0.3138 | 4.3587 | 0.1336 | 1.4532 | 0 |
| 690 | 434.5 | 1.7969 | 0.2336 | 4.7097 | 3.8198 | 0.0266 | 2.5471 | 0.0000 | 3.7478 | 0.1695 | 2.4697 | 0.0000 | 1.9608    | 0.0000 | 2.9415 | 0.3132 | 4.3561 | 0.1325 | 1.4532 | 0 |
| 691 | 433.9 | 1.7943 | 0.2338 | 4.7177 | 3.8186 | 0.0266 | 2.5461 | 0.0000 | 3.7466 | 0.1694 | 2.4693 | 0.0000 | 1.9593    | 0.0000 | 2.9408 | 0.3126 | 4.3536 | 0.1314 | 1.4532 | 0 |
| 692 | 433.2 | 1.7917 | 0.2340 | 4.7258 | 3.8173 | 0.0265 | 2.5451 | 0.0000 | 3.7454 | 0.1692 | 2.4690 | 0.0000 | 1.9579    | 0.0000 | 2.9401 | 0.3121 | 4.3512 | 0.1303 | 1.4531 | 0 |
| 693 | 432.6 | 1.7891 | 0.2341 | 4.7339 | 3.8161 | 0.0264 | 2.5442 | 0.0000 | 3.7442 | 0.1691 | 2.4687 | 0.0000 | 1.9565    | 0.0000 | 2.9394 | 0.3115 | 4.3487 | 0.1292 | 1.4531 | 0 |
| 694 | 432   | 1.7865 | 0.2343 | 4.7419 | 3.8149 | 0.0264 | 2.5432 | 0.0000 | 3.7430 | 0.1690 | 2.4684 | 0.0000 | 1.9551    | 0.0000 | 2.9388 | 0.3109 | 4.3462 | 0.1281 | 1.4531 | 0 |
| 695 | 431.4 | 1.7839 | 0.2345 | 4.7500 | 3.8137 | 0.0263 | 2.5423 | 0.0000 | 3.7418 | 0.1688 | 2.4680 | 0.0000 | 1.9537    | 0.0000 | 2.9381 | 0.3103 | 4.3438 | 0.1270 | 1.4531 | 0 |
| 696 | 430.7 | 1.7814 | 0.2346 | 4.7581 | 3.8125 | 0.0262 | 2.5413 | 0.0000 | 3.7406 | 0.1687 | 2.4677 | 0.0000 | 1.9524    | 0.0000 | 2.9374 | 0.3098 | 4.3413 | 0.1260 | 1.4531 | 0 |
| 697 | 430.1 | 1.7788 | 0.2348 | 4.7661 | 3.8113 | 0.0262 | 2.5404 | 0.0000 | 3.7395 | 0.1685 | 2.4674 | 0.0000 | 1.9511    | 0.0000 | 2.9368 | 0.3092 | 4.3389 | 0.1250 | 1.4530 | 0 |
| 698 | 429.5 | 1.7763 | 0.2350 | 4.7742 | 3.8101 | 0.0261 | 2.5395 | 0.0000 | 3.7383 | 0.1684 | 2.4671 | 0.0000 | 1.9498    | 0.0000 | 2.9361 | 0.3087 | 4.3365 | 0.1239 | 1.4530 | 0 |
| 699 | 428.9 | 1.7737 | 0.2352 | 4.7822 | 3.8090 | 0.0261 | 2.5386 | 0.0000 | 3.7372 | 0.1682 | 2.4668 | 0.0000 | 1.9485    | 0.0000 | 2.9354 | 0.3081 | 4.3341 | 0.1229 | 1.4530 | 0 |
| 700 | 428.3 | 1.7712 | 0.2353 | 4.7903 | 3.8078 | 0.0260 | 2.5376 | 0.0000 | 3.7361 | 0.1681 | 2.4665 | 0.0000 | 1.9473    | 0.0000 | 2.9348 | 0.3076 | 4.3317 | 0.1219 | 1.4530 | 0 |
| 701 | 427.7 | 1.7687 | 0.2355 | 4.7983 | 3.8066 | 0.0259 | 2.5367 | 0.0000 | 3.7349 | 0.1680 | 2.4661 | 0.0000 | 1.9460    | 0.0000 | 2.9341 | 0.3070 | 4.3293 | 0.1209 | 1.4530 | 0 |
| 702 | 427.1 | 1.7662 | 0.2357 | 4.8063 | 3.8055 | 0.0259 | 2.5358 | 0.0000 | 3.7338 | 0.1678 | 2.4658 | 0.0000 | 1.9448    | 0.0000 | 2.9335 | 0.3065 | 4.3269 | 0.1199 | 1.4529 | 0 |
| 703 | 426.4 | 1.7636 | 0.2358 | 4.8144 | 3.8043 | 0.0258 | 2.5349 | 0.0000 | 3.7327 | 0.1677 | 2.4655 | 0.0000 | 1.9436    | 0.0000 | 2.9328 | 0.3060 | 4.3246 | 0.1190 | 1.4529 | 0 |
| 704 | 425.8 | 1.7611 | 0.2360 | 4.8224 | 3.8032 | 0.0258 | 2.5340 | 0.0000 | 3.7316 | 0.1676 | 2.4652 | 0.0000 | 1.9424    | 0.0000 | 2.9322 | 0.3055 | 4.3222 | 0.1180 | 1.4529 | 0 |
| 705 | 425.2 | 1.7586 | 0.2362 | 4.8305 | 3.8021 | 0.0257 | 2.5331 | 0.0000 | 3.7305 | 0.1674 | 2.4649 | 0.0000 | 1.9413    | 0.0000 | 2.9315 | 0.3049 | 4.3199 | 0.1171 | 1.4529 | 0 |
| 706 | 424.6 | 1.7562 | 0.2363 | 4.8385 | 3.8009 | 0.0256 | 2.5322 | 0.0000 | 3.7294 | 0.1673 | 2.4646 | 0.0000 | 1.9401    | 0.0000 | 2.9309 | 0.3044 | 4.3176 | 0.1161 | 1.4529 | 0 |
| 707 | 424   | 1.7537 | 0.2365 | 4.8465 | 3.7998 | 0.0256 | 2.5313 | 0.0000 | 3.7284 | 0.1672 | 2.4643 | 0.0000 | 1.9390    | 0.0000 | 2.9302 | 0.3039 | 4.3153 | 0.1152 | 1.4529 | 0 |
| 708 | 423.4 | 1.7512 | 0.2367 | 4.8545 | 3.7987 | 0.0255 | 2.5305 | 0.0000 | 3.7273 | 0.1670 | 2.4640 | 0.0000 | 1.9379    | 0.0000 | 2.9296 | 0.3034 | 4.3130 | 0.1143 | 1.4528 | 0 |
| 709 | 422.8 | 1.7487 | 0.2368 | 4.8626 | 3.7976 | 0.0255 | 2.5296 | 0.0000 | 3.7262 | 0.1669 | 2.4637 | 0.0000 | 1.9368    | 0.0000 | 2.9290 | 0.3029 | 4.3107 | 0.1134 | 1.4528 | 0 |
| 710 | 422.2 | 1.7463 | 0.2370 | 4.8706 | 3.7965 | 0.0254 | 2.5287 | 0.0000 | 3.7252 | 0.1668 | 2.4634 | 0.0000 | 1.9357    | 0.0000 | 2.9283 | 0.3024 | 4.3084 | 0.1125 | 1.4528 | 0 |
| 711 | 421.6 | 1.7438 | 0.2372 | 4.8786 | 3.7954 | 0.0253 | 2.5279 | 0.0000 | 3.7241 | 0.1666 | 2.4631 | 0.0000 | 1.9346    | 0.0000 | 2.9277 | 0.3019 | 4.3062 | 0.1116 | 1.4528 | 0 |



| nm  | THz   | eV     | Ag     |        | cSi    |        | Fe2O3  |        | GaAs   |        | TiO2   |        | P3HT:PCBM |        | CdTe   |        | aSi    |        | SiO2   |   |
|-----|-------|--------|--------|--------|--------|--------|--------|--------|--------|--------|--------|--------|-----------|--------|--------|--------|--------|--------|--------|---|
|     |       |        | n      | k      | n      | k      | n      | k      | n      | k      | n      | k      | n         | k      | n      | k      | n      | k      | n      | k |
| 712 | 421.1 | 1.7414 | 0.2373 | 4.8866 | 3.7943 | 0.0253 | 2.5270 | 0.0000 | 3.7231 | 0.1665 | 2.4628 | 0.0000 | 1.9335    | 0.0000 | 2.9271 | 0.3014 | 4.3039 | 0.1108 | 1.4528 | 0 |
| 713 | 420.5 | 1.7389 | 0.2375 | 4.8947 | 3.7932 | 0.0252 | 2.5261 | 0.0000 | 3.7221 | 0.1664 | 2.4625 | 0.0000 | 1.9325    | 0.0000 | 2.9265 | 0.3009 | 4.3017 | 0.1099 | 1.4527 | 0 |
| 714 | 419.9 | 1.7365 | 0.2376 | 4.9027 | 3.7921 | 0.0252 | 2.5253 | 0.0000 | 3.7211 | 0.1662 | 2.4622 | 0.0000 | 1.9315    | 0.0000 | 2.9258 | 0.3005 | 4.2994 | 0.1091 | 1.4527 | 0 |
| 715 | 419.3 | 1.7340 | 0.2378 | 4.9107 | 3.7911 | 0.0251 | 2.5245 | 0.0000 | 3.7200 | 0.1661 | 2.4619 | 0.0000 | 1.9305    | 0.0000 | 2.9252 | 0.3000 | 4.2972 | 0.1082 | 1.4527 | 0 |
| 716 | 418.7 | 1.7316 | 0.2380 | 4.9187 | 3.7900 | 0.0251 | 2.5236 | 0.0000 | 3.7190 | 0.1660 | 2.4617 | 0.0000 | 1.9294    | 0.0000 | 2.9246 | 0.2995 | 4.2950 | 0.1074 | 1.4527 | 0 |
| 717 | 418.1 | 1.7292 | 0.2381 | 4.9267 | 3.7889 | 0.0250 | 2.5228 | 0.0000 | 3.7180 | 0.1659 | 2.4614 | 0.0000 | 1.9285    | 0.0000 | 2.9240 | 0.2991 | 4.2928 | 0.1066 | 1.4527 | 0 |
| 718 | 417.5 | 1.7268 | 0.2383 | 4.9347 | 3.7879 | 0.0250 | 2.5220 | 0.0000 | 3.7170 | 0.1657 | 2.4611 | 0.0000 | 1.9275    | 0.0000 | 2.9234 | 0.2986 | 4.2906 | 0.1058 | 1.4526 | 0 |
| 719 | 417   | 1.7244 | 0.2385 | 4.9427 | 3.7868 | 0.0249 | 2.5211 | 0.0000 | 3.7161 | 0.1656 | 2.4608 | 0.0000 | 1.9265    | 0.0000 | 2.9228 | 0.2981 | 4.2885 | 0.1050 | 1.4526 | 0 |
| 720 | 416.4 | 1.7220 | 0.2386 | 4.9507 | 3.7858 | 0.0248 | 2.5203 | 0.0000 | 3.7151 | 0.1655 | 2.4605 | 0.0000 | 1.9256    | 0.0000 | 2.9222 | 0.2977 | 4.2863 | 0.1042 | 1.4526 | 0 |
| 721 | 415.8 | 1.7196 | 0.2388 | 4.9588 | 3.7847 | 0.0248 | 2.5195 | 0.0000 | 3.7141 | 0.1654 | 2.4602 | 0.0000 | 1.9246    | 0.0000 | 2.9216 | 0.2972 | 4.2842 | 0.1034 | 1.4526 | 0 |
| 722 | 415.2 | 1.7172 | 0.2390 | 4.9668 | 3.7837 | 0.0247 | 2.5187 | 0.0000 | 3.7131 | 0.1652 | 2.4599 | 0.0000 | 1.9237    | 0.0000 | 2.9210 | 0.2968 | 4.2820 | 0.1026 | 1.4526 | 0 |
| 723 | 414.7 | 1.7149 | 0.2391 | 4.9748 | 3.7827 | 0.0247 | 2.5179 | 0.0000 | 3.7122 | 0.1651 | 2.4597 | 0.0000 | 1.9228    | 0.0000 | 2.9204 | 0.2964 | 4.2799 | 0.1019 | 1.4526 | 0 |
| 724 | 414.1 | 1.7125 | 0.2393 | 4.9828 | 3.7816 | 0.0246 | 2.5171 | 0.0000 | 3.7112 | 0.1650 | 2.4594 | 0.0000 | 1.9219    | 0.0000 | 2.9198 | 0.2959 | 4.2778 | 0.1011 | 1.4525 | 0 |
| 725 | 413.5 | 1.7101 | 0.2395 | 4.9908 | 3.7806 | 0.0246 | 2.5163 | 0.0000 | 3.7103 | 0.1649 | 2.4591 | 0.0000 | 1.9210    | 0.0000 | 2.9192 | 0.2955 | 4.2757 | 0.1004 | 1.4525 | 0 |
| 726 | 412.9 | 1.7078 | 0.2396 | 4.9987 | 3.7796 | 0.0245 | 2.5155 | 0.0000 | 3.7093 | 0.1648 | 2.4588 | 0.0000 | 1.9201    | 0.0000 | 2.9186 | 0.2950 | 4.2736 | 0.0996 | 1.4525 | 0 |
| 727 | 412.4 | 1.7054 | 0.2398 | 5.0067 | 3.7786 | 0.0245 | 2.5147 | 0.0000 | 3.7084 | 0.1646 | 2.4586 | 0.0000 | 1.9192    | 0.0000 | 2.9180 | 0.2946 | 4.2715 | 0.0989 | 1.4525 | 0 |
| 728 | 411.8 | 1.7031 | 0.2399 | 5.0147 | 3.7776 | 0.0244 | 2.5139 | 0.0000 | 3.7075 | 0.1645 | 2.4583 | 0.0000 | 1.9183    | 0.0000 | 2.9174 | 0.2942 | 4.2694 | 0.0982 | 1.4525 | 0 |
| 729 | 411.2 | 1.7007 | 0.2401 | 5.0227 | 3.7766 | 0.0244 | 2.5131 | 0.0000 | 3.7066 | 0.1644 | 2.4580 | 0.0000 | 1.9175    | 0.0000 | 2.9169 | 0.2938 | 4.2674 | 0.0975 | 1.4524 | 0 |
| 730 | 410.7 | 1.6984 | 0.2403 | 5.0307 | 3.7756 | 0.0243 | 2.5124 | 0.0000 | 3.7057 | 0.1643 | 2.4578 | 0.0000 | 1.9166    | 0.0000 | 2.9163 | 0.2934 | 4.2653 | 0.0968 | 1.4524 | 0 |
| 731 | 410.1 | 1.6961 | 0.2404 | 5.0387 | 3.7746 | 0.0243 | 2.5116 | 0.0000 | 3.7048 | 0.1642 | 2.4575 | 0.0000 | 1.9158    | 0.0000 | 2.9157 | 0.2930 | 4.2633 | 0.0961 | 1.4524 | 0 |
| 732 | 409.6 | 1.6938 | 0.2406 | 5.0467 | 3.7737 | 0.0242 | 2.5108 | 0.0000 | 3.7039 | 0.1641 | 2.4572 | 0.0000 | 1.9150    | 0.0000 | 2.9151 | 0.2925 | 4.2612 | 0.0954 | 1.4524 | 0 |
| 733 | 409   | 1.6915 | 0.2408 | 5.0547 | 3.7727 | 0.0242 | 2.5101 | 0.0000 | 3.7030 | 0.1639 | 2.4570 | 0.0000 | 1.9141    | 0.0000 | 2.9146 | 0.2921 | 4.2592 | 0.0947 | 1.4524 | 0 |
| 734 | 408.4 | 1.6892 | 0.2409 | 5.0626 | 3.7717 | 0.0241 | 2.5093 | 0.0000 | 3.7021 | 0.1638 | 2.4567 | 0.0000 | 1.9133    | 0.0000 | 2.9140 | 0.2917 | 4.2572 | 0.0941 | 1.4524 | 0 |
| 735 | 407.9 | 1.6869 | 0.2411 | 5.0706 | 3.7707 | 0.0241 | 2.5086 | 0.0000 | 3.7012 | 0.1637 | 2.4564 | 0.0000 | 1.9125    | 0.0000 | 2.9134 | 0.2913 | 4.2552 | 0.0934 | 1.4523 | 0 |
| 736 | 407.3 | 1.6846 | 0.2412 | 5.0786 | 3.7698 | 0.0240 | 2.5078 | 0.0000 | 3.7003 | 0.1636 | 2.4562 | 0.0000 | 1.9117    | 0.0000 | 2.9129 | 0.2910 | 4.2532 | 0.0927 | 1.4523 | 0 |
| 737 | 406.8 | 1.6823 | 0.2414 | 5.0866 | 3.7688 | 0.0240 | 2.5071 | 0.0000 | 3.6994 | 0.1635 | 2.4559 | 0.0000 | 1.9110    | 0.0000 | 2.9123 | 0.2906 | 4.2512 | 0.0921 | 1.4523 | 0 |
| 738 | 406.2 | 1.6800 | 0.2416 | 5.0946 | 3.7679 | 0.0239 | 2.5063 | 0.0000 | 3.6986 | 0.1634 | 2.4556 | 0.0000 | 1.9102    | 0.0000 | 2.9117 | 0.2902 | 4.2492 | 0.0915 | 1.4523 | 0 |
| 739 | 405.7 | 1.6777 | 0.2417 | 5.1025 | 3.7669 | 0.0239 | 2.5056 | 0.0000 | 3.6977 | 0.1633 | 2.4554 | 0.0000 | 1.9094    | 0.0000 | 2.9112 | 0.2898 | 4.2473 | 0.0908 | 1.4523 | 0 |
| 740 | 405.1 | 1.6755 | 0.2419 | 5.1105 | 3.7660 | 0.0238 | 2.5049 | 0.0000 | 3.6969 | 0.1632 | 2.4551 | 0.0000 | 1.9087    | 0.0000 | 2.9106 | 0.2894 | 4.2453 | 0.0902 | 1.4523 | 0 |
| 741 | 404.6 | 1.6732 | 0.2421 | 5.1185 | 3.7651 | 0.0238 | 2.5041 | 0.0000 | 3.6960 | 0.1630 | 2.4549 | 0.0000 | 1.9079    | 0.0000 | 2.9101 | 0.2890 | 4.2434 | 0.0896 | 1.4522 | 0 |
| 742 | 404   | 1.6709 | 0.2422 | 5.1264 | 3.7641 | 0.0237 | 2.5034 | 0.0000 | 3.6952 | 0.1629 | 2.4546 | 0.0000 | 1.9072    | 0.0000 | 2.9095 | 0.2887 | 4.2415 | 0.0890 | 1.4522 | 0 |
| 743 | 403.5 | 1.6687 | 0.2424 | 5.1344 | 3.7632 | 0.0237 | 2.5027 | 0.0000 | 3.6943 | 0.1628 | 2.4544 | 0.0000 | 1.9064    | 0.0000 | 2.9090 | 0.2883 | 4.2395 | 0.0884 | 1.4522 | 0 |

| nm  | THz   | eV     | Ag     |        | cSi    |        | Fe2O3  |        | GaAs   |        | TiO2   |        | P3HT:PCBM |        | CdTe   |        | aSi    |        | SiO2   |   |
|-----|-------|--------|--------|--------|--------|--------|--------|--------|--------|--------|--------|--------|-----------|--------|--------|--------|--------|--------|--------|---|
|     |       |        | n      | k      | n      | k      | n      | k      | n      | k      | n      | k      | n         | k      | n      | k      | n      | k      | n      | k |
| 744 | 402.9 | 1.6665 | 0.2425 | 5.1424 | 3.7623 | 0.0236 | 2.5020 | 0.0000 | 3.6935 | 0.1627 | 2.4541 | 0.0000 | 1.9057    | 0.0000 | 2.9084 | 0.2879 | 4.2376 | 0.0878 | 1.4522 | 0 |
| 745 | 402.4 | 1.6642 | 0.2427 | 5.1503 | 3.7614 | 0.0236 | 2.5013 | 0.0000 | 3.6927 | 0.1626 | 2.4539 | 0.0000 | 1.9050    | 0.0000 | 2.9079 | 0.2876 | 4.2357 | 0.0872 | 1.4522 | 0 |
| 746 | 401.9 | 1.6620 | 0.2429 | 5.1583 | 3.7604 | 0.0235 | 2.5005 | 0.0000 | 3.6919 | 0.1625 | 2.4536 | 0.0000 | 1.9043    | 0.0000 | 2.9074 | 0.2872 | 4.2338 | 0.0866 | 1.4522 | 0 |
| 747 | 401.3 | 1.6598 | 0.2430 | 5.1663 | 3.7595 | 0.0235 | 2.4998 | 0.0000 | 3.6911 | 0.1624 | 2.4534 | 0.0000 | 1.9036    | 0.0000 | 2.9068 | 0.2868 | 4.2320 | 0.0861 | 1.4521 | 0 |
| 748 | 400.8 | 1.6575 | 0.2432 | 5.1742 | 3.7586 | 0.0234 | 2.4991 | 0.0000 | 3.6903 | 0.1623 | 2.4531 | 0.0000 | 1.9029    | 0.0000 | 2.9063 | 0.2865 | 4.2301 | 0.0855 | 1.4521 | 0 |
| 749 | 400.3 | 1.6553 | 0.2433 | 5.1822 | 3.7577 | 0.0234 | 2.4984 | 0.0000 | 3.6895 | 0.1622 | 2.4529 | 0.0000 | 1.9022    | 0.0000 | 2.9058 | 0.2861 | 4.2282 | 0.0849 | 1.4521 | 0 |
| 750 | 399.7 | 1.6531 | 0.2435 | 5.1901 | 3.7568 | 0.0234 | 2.4978 | 0.0000 | 3.6887 | 0.1621 | 2.4526 | 0.0000 | 1.9015    | 0.0000 | 2.9052 | 0.2858 | 4.2264 | 0.0844 | 1.4521 | 0 |
| 751 | 399.2 | 1.6509 | 0.2437 | 5.1981 | 3.7560 | 0.0233 | 2.4971 | 0.0000 | 3.6879 | 0.1619 | 2.4524 | 0.0000 | 1.9008    | 0.0000 | 2.9047 | 0.2854 | 4.2245 | 0.0838 | 1.4521 | 0 |
| 752 | 398.7 | 1.6487 | 0.2438 | 5.2060 | 3.7551 | 0.0233 | 2.4964 | 0.0000 | 3.6871 | 0.1618 | 2.4521 | 0.0000 | 1.9001    | 0.0000 | 2.9042 | 0.2851 | 4.2227 | 0.0833 | 1.4521 | 0 |
| 753 | 398.1 | 1.6465 | 0.2440 | 5.2140 | 3.7542 | 0.0232 | 2.4957 | 0.0000 | 3.6863 | 0.1617 | 2.4519 | 0.0000 | 1.8995    | 0.0000 | 2.9037 | 0.2848 | 4.2209 | 0.0828 | 1.4520 | 0 |
| 754 | 397.6 | 1.6444 | 0.2441 | 5.2219 | 3.7533 | 0.0232 | 2.4950 | 0.0000 | 3.6855 | 0.1616 | 2.4517 | 0.0000 | 1.8988    | 0.0000 | 2.9031 | 0.2844 | 4.2191 | 0.0822 | 1.4520 | 0 |
| 755 | 397.1 | 1.6422 | 0.2443 | 5.2299 | 3.7524 | 0.0231 | 2.4943 | 0.0000 | 3.6848 | 0.1615 | 2.4514 | 0.0000 | 1.8982    | 0.0000 | 2.9026 | 0.2841 | 4.2173 | 0.0817 | 1.4520 | 0 |
| 756 | 396.6 | 1.6400 | 0.2445 | 5.2378 | 3.7516 | 0.0231 | 2.4937 | 0.0000 | 3.6840 | 0.1614 | 2.4512 | 0.0000 | 1.8975    | 0.0000 | 2.9021 | 0.2838 | 4.2155 | 0.0812 | 1.4520 | 0 |
| 757 | 396   | 1.6378 | 0.2446 | 5.2458 | 3.7507 | 0.0230 | 2.4930 | 0.0000 | 3.6832 | 0.1613 | 2.4509 | 0.0000 | 1.8969    | 0.0000 | 2.9016 | 0.2834 | 4.2137 | 0.0807 | 1.4520 | 0 |
| 758 | 395.5 | 1.6357 | 0.2448 | 5.2537 | 3.7499 | 0.0230 | 2.4923 | 0.0000 | 3.6825 | 0.1612 | 2.4507 | 0.0000 | 1.8962    | 0.0000 | 2.9011 | 0.2831 | 4.2119 | 0.0802 | 1.4520 | 0 |
| 759 | 395   | 1.6335 | 0.2449 | 5.2617 | 3.7490 | 0.0230 | 2.4917 | 0.0000 | 3.6817 | 0.1611 | 2.4505 | 0.0000 | 1.8956    | 0.0000 | 2.9006 | 0.2828 | 4.2101 | 0.0797 | 1.4520 | 0 |
| 760 | 394.5 | 1.6314 | 0.2451 | 5.2696 | 3.7481 | 0.0229 | 2.4910 | 0.0000 | 3.6810 | 0.1610 | 2.4502 | 0.0000 | 1.8950    | 0.0000 | 2.9001 | 0.2825 | 4.2084 | 0.0792 | 1.4519 | 0 |
| 761 | 393.9 | 1.6292 | 0.2453 | 5.2776 | 3.7473 | 0.0229 | 2.4904 | 0.0000 | 3.6802 | 0.1609 | 2.4500 | 0.0000 | 1.8944    | 0.0000 | 2.8996 | 0.2822 | 4.2066 | 0.0787 | 1.4519 | 0 |
| 762 | 393.4 | 1.6271 | 0.2454 | 5.2855 | 3.7465 | 0.0228 | 2.4897 | 0.0000 | 3.6795 | 0.1608 | 2.4498 | 0.0000 | 1.8938    | 0.0000 | 2.8991 | 0.2818 | 4.2049 | 0.0783 | 1.4519 | 0 |
| 763 | 392.9 | 1.6250 | 0.2456 | 5.2934 | 3.7456 | 0.0228 | 2.4891 | 0.0000 | 3.6788 | 0.1607 | 2.4495 | 0.0000 | 1.8932    | 0.0000 | 2.8986 | 0.2815 | 4.2032 | 0.0778 | 1.4519 | 0 |
| 764 | 392.4 | 1.6228 | 0.2457 | 5.3014 | 3.7448 | 0.0227 | 2.4884 | 0.0000 | 3.6780 | 0.1606 | 2.4493 | 0.0000 | 1.8926    | 0.0000 | 2.8981 | 0.2812 | 4.2014 | 0.0773 | 1.4519 | 0 |
| 765 | 391.9 | 1.6207 | 0.2459 | 5.3093 | 3.7440 | 0.0227 | 2.4878 | 0.0000 | 3.6773 | 0.1605 | 2.4491 | 0.0000 | 1.8920    | 0.0000 | 2.8976 | 0.2809 | 4.1997 | 0.0769 | 1.4519 | 0 |
| 766 | 391.4 | 1.6186 | 0.2460 | 5.3172 | 3.7431 | 0.0226 | 2.4872 | 0.0000 | 3.6766 | 0.1604 | 2.4489 | 0.0000 | 1.8914    | 0.0000 | 2.8971 | 0.2806 | 4.1980 | 0.0764 | 1.4518 | 0 |
| 767 | 390.9 | 1.6165 | 0.2462 | 5.3252 | 3.7423 | 0.0226 | 2.4865 | 0.0000 | 3.6759 | 0.1603 | 2.4486 | 0.0000 | 1.8908    | 0.0000 | 2.8966 | 0.2803 | 4.1963 | 0.0760 | 1.4518 | 0 |
| 768 | 390.4 | 1.6144 | 0.2464 | 5.3331 | 3.7415 | 0.0226 | 2.4859 | 0.0000 | 3.6752 | 0.1602 | 2.4484 | 0.0000 | 1.8902    | 0.0000 | 2.8961 | 0.2800 | 4.1946 | 0.0755 | 1.4518 | 0 |
| 769 | 389.8 | 1.6123 | 0.2465 | 5.3410 | 3.7407 | 0.0225 | 2.4853 | 0.0000 | 3.6745 | 0.1601 | 2.4482 | 0.0000 | 1.8896    | 0.0000 | 2.8956 | 0.2797 | 4.1930 | 0.0751 | 1.4518 | 0 |
| 770 | 389.3 | 1.6102 | 0.2467 | 5.3490 | 3.7399 | 0.0225 | 2.4847 | 0.0000 | 3.6738 | 0.1600 | 2.4480 | 0.0000 | 1.8891    | 0.0000 | 2.8952 | 0.2794 | 4.1913 | 0.0747 | 1.4518 | 0 |
| 771 | 388.8 | 1.6081 | 0.2468 | 5.3569 | 3.7391 | 0.0224 | 2.4841 | 0.0000 | 3.6731 | 0.1599 | 2.4477 | 0.0000 | 1.8885    | 0.0000 | 2.8947 | 0.2792 | 4.1896 | 0.0742 | 1.4518 | 0 |
| 772 | 388.3 | 1.6060 | 0.2470 | 5.3648 | 3.7383 | 0.0224 | 2.4834 | 0.0000 | 3.6724 | 0.1598 | 2.4475 | 0.0000 | 1.8879    | 0.0000 | 2.8942 | 0.2789 | 4.1880 | 0.0738 | 1.4518 | 0 |
| 773 | 387.8 | 1.6039 | 0.2472 | 5.3727 | 3.7375 | 0.0224 | 2.4828 | 0.0000 | 3.6717 | 0.1597 | 2.4473 | 0.0000 | 1.8874    | 0.0000 | 2.8937 | 0.2786 | 4.1863 | 0.0734 | 1.4517 | 0 |
| 774 | 387.3 | 1.6019 | 0.2473 | 5.3807 | 3.7367 | 0.0223 | 2.4822 | 0.0000 | 3.6710 | 0.1596 | 2.4471 | 0.0000 | 1.8868    | 0.0000 | 2.8933 | 0.2783 | 4.1847 | 0.0730 | 1.4517 | 0 |
| 775 | 386.8 | 1.5998 | 0.2475 | 5.3886 | 3.7359 | 0.0223 | 2.4816 | 0.0000 | 3.6703 | 0.1595 | 2.4469 | 0.0000 | 1.8863    | 0.0000 | 2.8928 | 0.2780 | 4.1831 | 0.0726 | 1.4517 | 0 |

| nm  | THz   | eV     | Ag     |        | cSi    |        | Fe2O3  |        | GaAs   |        | TiO2   |        | P3HT:PCBM |        | CdTe   |        | aSi    |        | SiO2   |   |
|-----|-------|--------|--------|--------|--------|--------|--------|--------|--------|--------|--------|--------|-----------|--------|--------|--------|--------|--------|--------|---|
|     |       |        | n      | k      | n      | k      | n      | k      | n      | k      | n      | k      | n         | k      | n      | k      | n      | k      | n      | k |
| 776 | 386.3 | 1.5977 | 0.2476 | 5.3965 | 3.7351 | 0.0222 | 2.4810 | 0.0000 | 3.6697 | 0.1594 | 2.4466 | 0.0000 | 1.8857    | 0.0000 | 2.8923 | 0.2777 | 4.1814 | 0.0722 | 1.4517 | 0 |
| 777 | 385.8 | 1.5957 | 0.2478 | 5.4044 | 3.7343 | 0.0222 | 2.4804 | 0.0000 | 3.6690 | 0.1593 | 2.4464 | 0.0000 | 1.8852    | 0.0000 | 2.8918 | 0.2775 | 4.1798 | 0.0718 | 1.4517 | 0 |
| 778 | 385.3 | 1.5936 | 0.2479 | 5.4123 | 3.7335 | 0.0222 | 2.4798 | 0.0000 | 3.6683 | 0.1592 | 2.4462 | 0.0000 | 1.8847    | 0.0000 | 2.8914 | 0.2772 | 4.1782 | 0.0714 | 1.4517 | 0 |
| 779 | 384.8 | 1.5916 | 0.2481 | 5.4203 | 3.7328 | 0.0221 | 2.4792 | 0.0000 | 3.6677 | 0.1591 | 2.4460 | 0.0000 | 1.8841    | 0.0000 | 2.8909 | 0.2769 | 4.1766 | 0.0710 | 1.4517 | 0 |
| 780 | 384.3 | 1.5895 | 0.2483 | 5.4282 | 3.7320 | 0.0221 | 2.4787 | 0.0000 | 3.6670 | 0.1590 | 2.4458 | 0.0000 | 1.8836    | 0.0000 | 2.8905 | 0.2767 | 4.1750 | 0.0706 | 1.4516 | 0 |
| 781 | 383.9 | 1.5875 | 0.2484 | 5.4361 | 3.7312 | 0.0220 | 2.4781 | 0.0000 | 3.6664 | 0.1589 | 2.4456 | 0.0000 | 1.8831    | 0.0000 | 2.8900 | 0.2764 | 4.1735 | 0.0702 | 1.4516 | 0 |
| 782 | 383.4 | 1.5855 | 0.2486 | 5.4440 | 3.7305 | 0.0220 | 2.4775 | 0.0000 | 3.6657 | 0.1588 | 2.4454 | 0.0000 | 1.8826    | 0.0000 | 2.8896 | 0.2761 | 4.1719 | 0.0699 | 1.4516 | 0 |
| 783 | 382.9 | 1.5835 | 0.2487 | 5.4519 | 3.7297 | 0.0220 | 2.4769 | 0.0000 | 3.6651 | 0.1587 | 2.4451 | 0.0000 | 1.8821    | 0.0000 | 2.8891 | 0.2759 | 4.1703 | 0.0695 | 1.4516 | 0 |
| 784 | 382.4 | 1.5814 | 0.2489 | 5.4598 | 3.7289 | 0.0219 | 2.4763 | 0.0000 | 3.6644 | 0.1586 | 2.4449 | 0.0000 | 1.8816    | 0.0000 | 2.8887 | 0.2756 | 4.1688 | 0.0691 | 1.4516 | 0 |
| 785 | 381.9 | 1.5794 | 0.2490 | 5.4677 | 3.7282 | 0.0219 | 2.4758 | 0.0000 | 3.6638 | 0.1585 | 2.4447 | 0.0000 | 1.8811    | 0.0000 | 2.8882 | 0.2754 | 4.1672 | 0.0688 | 1.4516 | 0 |
| 786 | 381.4 | 1.5774 | 0.2492 | 5.4756 | 3.7274 | 0.0218 | 2.4752 | 0.0000 | 3.6632 | 0.1584 | 2.4445 | 0.0000 | 1.8806    | 0.0000 | 2.8878 | 0.2751 | 4.1657 | 0.0684 | 1.4516 | 0 |
| 787 | 380.9 | 1.5754 | 0.2494 | 5.4836 | 3.7267 | 0.0218 | 2.4746 | 0.0000 | 3.6625 | 0.1583 | 2.4443 | 0.0000 | 1.8801    | 0.0000 | 2.8873 | 0.2748 | 4.1642 | 0.0680 | 1.4515 | 0 |
| 788 | 380.4 | 1.5734 | 0.2495 | 5.4915 | 3.7260 | 0.0218 | 2.4741 | 0.0000 | 3.6619 | 0.1582 | 2.4441 | 0.0000 | 1.8796    | 0.0000 | 2.8869 | 0.2746 | 4.1626 | 0.0677 | 1.4515 | 0 |
| 789 | 380   | 1.5714 | 0.2497 | 5.4994 | 3.7252 | 0.0217 | 2.4735 | 0.0000 | 3.6613 | 0.1581 | 2.4439 | 0.0000 | 1.8791    | 0.0000 | 2.8864 | 0.2743 | 4.1611 | 0.0674 | 1.4515 | 0 |
| 790 | 379.5 | 1.5694 | 0.2498 | 5.5073 | 3.7245 | 0.0217 | 2.4730 | 0.0000 | 3.6607 | 0.1580 | 2.4437 | 0.0000 | 1.8786    | 0.0000 | 2.8860 | 0.2741 | 4.1596 | 0.0670 | 1.4515 | 0 |
| 791 | 379   | 1.5674 | 0.2500 | 5.5152 | 3.7237 | 0.0216 | 2.4724 | 0.0000 | 3.6601 | 0.1579 | 2.4435 | 0.0000 | 1.8781    | 0.0000 | 2.8856 | 0.2739 | 4.1581 | 0.0667 | 1.4515 | 0 |
| 792 | 378.5 | 1.5655 | 0.2501 | 5.5231 | 3.7230 | 0.0216 | 2.4718 | 0.0000 | 3.6595 | 0.1578 | 2.4433 | 0.0000 | 1.8776    | 0.0000 | 2.8851 | 0.2736 | 4.1566 | 0.0664 | 1.4515 | 0 |
| 793 | 378   | 1.5635 | 0.2503 | 5.5310 | 3.7223 | 0.0216 | 2.4713 | 0.0000 | 3.6588 | 0.1577 | 2.4431 | 0.0000 | 1.8772    | 0.0000 | 2.8847 | 0.2734 | 4.1551 | 0.0660 | 1.4515 | 0 |
| 794 | 377.6 | 1.5615 | 0.2504 | 5.5389 | 3.7216 | 0.0215 | 2.4708 | 0.0000 | 3.6582 | 0.1576 | 2.4429 | 0.0000 | 1.8767    | 0.0000 | 2.8843 | 0.2731 | 4.1537 | 0.0657 | 1.4515 | 0 |
| 795 | 377.1 | 1.5595 | 0.2506 | 5.5468 | 3.7209 | 0.0215 | 2.4702 | 0.0000 | 3.6576 | 0.1575 | 2.4427 | 0.0000 | 1.8762    | 0.0000 | 2.8838 | 0.2729 | 4.1522 | 0.0654 | 1.4514 | 0 |
| 796 | 376.6 | 1.5576 | 0.2508 | 5.5547 | 3.7201 | 0.0215 | 2.4697 | 0.0000 | 3.6571 | 0.1574 | 2.4425 | 0.0000 | 1.8758    | 0.0000 | 2.8834 | 0.2727 | 4.1507 | 0.0651 | 1.4514 | 0 |
| 797 | 376.2 | 1.5556 | 0.2509 | 5.5626 | 3.7194 | 0.0214 | 2.4691 | 0.0000 | 3.6565 | 0.1573 | 2.4423 | 0.0000 | 1.8753    | 0.0000 | 2.8830 | 0.2724 | 4.1493 | 0.0648 | 1.4514 | 0 |
| 798 | 375.7 | 1.5537 | 0.2511 | 5.5705 | 3.7187 | 0.0214 | 2.4686 | 0.0000 | 3.6559 | 0.1572 | 2.4421 | 0.0000 | 1.8749    | 0.0000 | 2.8826 | 0.2722 | 4.1478 | 0.0644 | 1.4514 | 0 |
| 799 | 375.2 | 1.5517 | 0.2512 | 5.5784 | 3.7180 | 0.0213 | 2.4681 | 0.0000 | 3.6553 | 0.1571 | 2.4419 | 0.0000 | 1.8744    | 0.0000 | 2.8821 | 0.2720 | 4.1464 | 0.0641 | 1.4514 | 0 |
| 800 | 374.7 | 1.5498 | 0.2514 | 5.5863 | 3.7173 | 0.0213 | 2.4675 | 0.0000 | 3.6547 | 0.1570 | 2.4417 | 0.0000 | 1.8740    | 0.0000 | 2.8817 | 0.2718 | 4.1450 | 0.0638 | 1.4514 | 0 |
| 801 | 374.3 | 1.5479 | 0.2515 | 5.5942 | 3.7166 | 0.0213 | 2.4670 | 0.0000 | 3.6541 | 0.1569 | 2.4415 | 0.0000 | 1.8735    | 0.0000 | 2.8813 | 0.2715 | 4.1435 | 0.0635 | 1.4514 | 0 |
| 802 | 373.8 | 1.5459 | 0.2517 | 5.6021 | 3.7159 | 0.0212 | 2.4665 | 0.0000 | 3.6536 | 0.1568 | 2.4413 | 0.0000 | 1.8731    | 0.0000 | 2.8809 | 0.2713 | 4.1421 | 0.0633 | 1.4513 | 0 |
| 803 | 373.3 | 1.5440 | 0.2519 | 5.6099 | 3.7152 | 0.0212 | 2.4660 | 0.0000 | 3.6530 | 0.1567 | 2.4411 | 0.0000 | 1.8726    | 0.0000 | 2.8805 | 0.2711 | 4.1407 | 0.0630 | 1.4513 | 0 |
| 804 | 372.9 | 1.5421 | 0.2520 | 5.6178 | 3.7145 | 0.0212 | 2.4655 | 0.0000 | 3.6524 | 0.1566 | 2.4409 | 0.0000 | 1.8722    | 0.0000 | 2.8801 | 0.2709 | 4.1393 | 0.0627 | 1.4513 | 0 |
| 805 | 372.4 | 1.5402 | 0.2522 | 5.6257 | 3.7138 | 0.0211 | 2.4649 | 0.0000 | 3.6519 | 0.1565 | 2.4407 | 0.0000 | 1.8718    | 0.0000 | 2.8797 | 0.2707 | 4.1379 | 0.0624 | 1.4513 | 0 |
| 806 | 372   | 1.5383 | 0.2523 | 5.6336 | 3.7132 | 0.0211 | 2.4644 | 0.0000 | 3.6513 | 0.1564 | 2.4405 | 0.0000 | 1.8713    | 0.0000 | 2.8793 | 0.2705 | 4.1365 | 0.0621 | 1.4513 | 0 |
| 807 | 371.5 | 1.5364 | 0.2525 | 5.6415 | 3.7125 | 0.0211 | 2.4639 | 0.0000 | 3.6507 | 0.1563 | 2.4403 | 0.0000 | 1.8709    | 0.0000 | 2.8789 | 0.2702 | 4.1351 | 0.0618 | 1.4513 | 0 |

| nm  | THz   | eV     | Ag     |        | cSi    |        | Fe2O3  |        | GaAs   |        | TiO2   |        | P3HT:PCBM |        | CdTe   |        | aSi    |        | SiO2   |   |
|-----|-------|--------|--------|--------|--------|--------|--------|--------|--------|--------|--------|--------|-----------|--------|--------|--------|--------|--------|--------|---|
|     |       |        | n      | k      | n      | k      | n      | k      | n      | k      | n      | k      | n         | k      | n      | k      | n      | k      | n      | k |
| 808 | 371   | 1.5345 | 0.2526 | 5.6494 | 3.7118 | 0.0210 | 2.4634 | 0.0000 | 3.6502 | 0.1562 | 2.4402 | 0.0000 | 1.8705    | 0.0000 | 2.8785 | 0.2700 | 4.1338 | 0.0616 | 1.4513 | 0 |
| 809 | 370.6 | 1.5326 | 0.2528 | 5.6573 | 3.7111 | 0.0210 | 2.4629 | 0.0000 | 3.6496 | 0.1561 | 2.4400 | 0.0000 | 1.8701    | 0.0000 | 2.8781 | 0.2698 | 4.1324 | 0.0613 | 1.4513 | 0 |
| 810 | 370.1 | 1.5307 | 0.2529 | 5.6652 | 3.7105 | 0.0210 | 2.4624 | 0.0000 | 3.6491 | 0.1561 | 2.4398 | 0.0000 | 1.8697    | 0.0000 | 2.8777 | 0.2696 | 4.1310 | 0.0610 | 1.4512 | 0 |
| 811 | 369.7 | 1.5288 | 0.2531 | 5.6730 | 3.7098 | 0.0209 | 2.4619 | 0.0000 | 3.6485 | 0.1560 | 2.4396 | 0.0000 | 1.8693    | 0.0000 | 2.8773 | 0.2694 | 4.1297 | 0.0608 | 1.4512 | 0 |
| 812 | 369.2 | 1.5269 | 0.2532 | 5.6809 | 3.7091 | 0.0209 | 2.4614 | 0.0000 | 3.6480 | 0.1559 | 2.4394 | 0.0000 | 1.8688    | 0.0000 | 2.8769 | 0.2692 | 4.1283 | 0.0605 | 1.4512 | 0 |
| 813 | 368.7 | 1.5250 | 0.2534 | 5.6888 | 3.7085 | 0.0208 | 2.4609 | 0.0000 | 3.6475 | 0.1558 | 2.4392 | 0.0000 | 1.8684    | 0.0000 | 2.8765 | 0.2690 | 4.1270 | 0.0603 | 1.4512 | 0 |
| 814 | 368.3 | 1.5231 | 0.2536 | 5.6967 | 3.7078 | 0.0208 | 2.4604 | 0.0000 | 3.6469 | 0.1557 | 2.4390 | 0.0000 | 1.8680    | 0.0000 | 2.8761 | 0.2688 | 4.1257 | 0.0600 | 1.4512 | 0 |
| 815 | 367.8 | 1.5213 | 0.2537 | 5.7046 | 3.7071 | 0.0208 | 2.4599 | 0.0000 | 3.6464 | 0.1556 | 2.4389 | 0.0000 | 1.8676    | 0.0000 | 2.8757 | 0.2686 | 4.1243 | 0.0598 | 1.4512 | 0 |
| 816 | 367.4 | 1.5194 | 0.2539 | 5.7125 | 3.7065 | 0.0207 | 2.4595 | 0.0000 | 3.6459 | 0.1555 | 2.4387 | 0.0000 | 1.8672    | 0.0000 | 2.8753 | 0.2684 | 4.1230 | 0.0595 | 1.4512 | 0 |
| 817 | 366.9 | 1.5176 | 0.2540 | 5.7203 | 3.7058 | 0.0207 | 2.4590 | 0.0000 | 3.6454 | 0.1554 | 2.4385 | 0.0000 | 1.8668    | 0.0000 | 2.8749 | 0.2682 | 4.1217 | 0.0593 | 1.4512 | 0 |
| 818 | 366.5 | 1.5157 | 0.2542 | 5.7282 | 3.7052 | 0.0207 | 2.4585 | 0.0000 | 3.6448 | 0.1553 | 2.4383 | 0.0000 | 1.8664    | 0.0000 | 2.8745 | 0.2680 | 4.1204 | 0.0590 | 1.4511 | 0 |
| 819 | 366   | 1.5138 | 0.2543 | 5.7361 | 3.7046 | 0.0206 | 2.4580 | 0.0000 | 3.6443 | 0.1552 | 2.4381 | 0.0000 | 1.8660    | 0.0000 | 2.8742 | 0.2678 | 4.1191 | 0.0588 | 1.4511 | 0 |
| 820 | 365.6 | 1.5120 | 0.2545 | 5.7440 | 3.7039 | 0.0206 | 2.4575 | 0.0000 | 3.6438 | 0.1551 | 2.4380 | 0.0000 | 1.8657    | 0.0000 | 2.8738 | 0.2677 | 4.1178 | 0.0586 | 1.4511 | 0 |
| 821 | 365.2 | 1.5102 | 0.2546 | 5.7518 | 3.7033 | 0.0206 | 2.4571 | 0.0000 | 3.6433 | 0.1550 | 2.4378 | 0.0000 | 1.8653    | 0.0000 | 2.8734 | 0.2675 | 4.1165 | 0.0583 | 1.4511 | 0 |
| 822 | 364.7 | 1.5083 | 0.2548 | 5.7597 | 3.7026 | 0.0205 | 2.4566 | 0.0000 | 3.6428 | 0.1549 | 2.4376 | 0.0000 | 1.8649    | 0.0000 | 2.8730 | 0.2673 | 4.1152 | 0.0581 | 1.4511 | 0 |
| 823 | 364.3 | 1.5065 | 0.2550 | 5.7676 | 3.7020 | 0.0205 | 2.4561 | 0.0000 | 3.6423 | 0.1548 | 2.4374 | 0.0000 | 1.8645    | 0.0000 | 2.8726 | 0.2671 | 4.1140 | 0.0579 | 1.4511 | 0 |
| 824 | 363.8 | 1.5047 | 0.2551 | 5.7755 | 3.7014 | 0.0205 | 2.4557 | 0.0000 | 3.6418 | 0.1547 | 2.4372 | 0.0000 | 1.8641    | 0.0000 | 2.8723 | 0.2669 | 4.1127 | 0.0576 | 1.4511 | 0 |
| 825 | 363.4 | 1.5028 | 0.2553 | 5.7833 | 3.7007 | 0.0204 | 2.4552 | 0.0000 | 3.6413 | 0.1547 | 2.4371 | 0.0000 | 1.8638    | 0.0000 | 2.8719 | 0.2667 | 4.1114 | 0.0574 | 1.4511 | 0 |
| 826 | 362.9 | 1.5010 | 0.2554 | 5.7912 | 3.7001 | 0.0204 | 2.4547 | 0.0000 | 3.6408 | 0.1546 | 2.4369 | 0.0000 | 1.8634    | 0.0000 | 2.8715 | 0.2666 | 4.1102 | 0.0572 | 1.4510 | 0 |
| 827 | 362.5 | 1.4992 | 0.2556 | 5.7991 | 3.6995 | 0.0204 | 2.4543 | 0.0000 | 3.6403 | 0.1545 | 2.4367 | 0.0000 | 1.8630    | 0.0000 | 2.8712 | 0.2664 | 4.1089 | 0.0570 | 1.4510 | 0 |
| 828 | 362.1 | 1.4974 | 0.2557 | 5.8069 | 3.6989 | 0.0203 | 2.4538 | 0.0000 | 3.6398 | 0.1544 | 2.4365 | 0.0000 | 1.8626    | 0.0000 | 2.8708 | 0.2662 | 4.1077 | 0.0568 | 1.4510 | 0 |
| 829 | 361.6 | 1.4956 | 0.2559 | 5.8148 | 3.6983 | 0.0203 | 2.4534 | 0.0000 | 3.6393 | 0.1543 | 2.4364 | 0.0000 | 1.8623    | 0.0000 | 2.8704 | 0.2660 | 4.1064 | 0.0566 | 1.4510 | 0 |
| 830 | 361.2 | 1.4938 | 0.2560 | 5.8227 | 3.6976 | 0.0203 | 2.4529 | 0.0000 | 3.6388 | 0.1542 | 2.4362 | 0.0000 | 1.8619    | 0.0000 | 2.8701 | 0.2659 | 4.1052 | 0.0564 | 1.4510 | 0 |
| 831 | 360.8 | 1.4920 | 0.2562 | 5.8305 | 3.6970 | 0.0202 | 2.4525 | 0.0000 | 3.6383 | 0.1541 | 2.4360 | 0.0000 | 1.8615    | 0.0000 | 2.8697 | 0.2657 | 4.1040 | 0.0562 | 1.4510 | 0 |
| 832 | 360.3 | 1.4902 | 0.2563 | 5.8384 | 3.6964 | 0.0202 | 2.4520 | 0.0000 | 3.6378 | 0.1540 | 2.4358 | 0.0000 | 1.8612    | 0.0000 | 2.8694 | 0.2655 | 4.1028 | 0.0560 | 1.4510 | 0 |
| 833 | 359.9 | 1.4884 | 0.2565 | 5.8463 | 3.6958 | 0.0202 | 2.4516 | 0.0000 | 3.6373 | 0.1539 | 2.4357 | 0.0000 | 1.8608    | 0.0000 | 2.8690 | 0.2653 | 4.1016 | 0.0558 | 1.4510 | 0 |
| 834 | 359.5 | 1.4866 | 0.2566 | 5.8541 | 3.6952 | 0.0201 | 2.4511 | 0.0000 | 3.6369 | 0.1538 | 2.4355 | 0.0000 | 1.8605    | 0.0000 | 2.8686 | 0.2652 | 4.1004 | 0.0556 | 1.4510 | 0 |
| 835 | 359   | 1.4848 | 0.2568 | 5.8620 | 3.6946 | 0.0201 | 2.4507 | 0.0000 | 3.6364 | 0.1537 | 2.4353 | 0.0000 | 1.8601    | 0.0000 | 2.8683 | 0.2650 | 4.0992 | 0.0554 | 1.4509 | 0 |
| 836 | 358.6 | 1.4831 | 0.2570 | 5.8699 | 3.6940 | 0.0201 | 2.4503 | 0.0000 | 3.6359 | 0.1536 | 2.4352 | 0.0000 | 1.8598    | 0.0000 | 2.8679 | 0.2649 | 4.0980 | 0.0552 | 1.4509 | 0 |
| 837 | 358.2 | 1.4813 | 0.2571 | 5.8777 | 3.6934 | 0.0201 | 2.4498 | 0.0000 | 3.6355 | 0.1535 | 2.4350 | 0.0000 | 1.8594    | 0.0000 | 2.8676 | 0.2647 | 4.0968 | 0.0550 | 1.4509 | 0 |
| 838 | 357.7 | 1.4795 | 0.2573 | 5.8856 | 3.6928 | 0.0200 | 2.4494 | 0.0000 | 3.6350 | 0.1535 | 2.4348 | 0.0000 | 1.8591    | 0.0000 | 2.8672 | 0.2645 | 4.0956 | 0.0548 | 1.4509 | 0 |
| 839 | 357.3 | 1.4778 | 0.2574 | 5.8935 | 3.6922 | 0.0200 | 2.4489 | 0.0000 | 3.6345 | 0.1534 | 2.4347 | 0.0000 | 1.8587    | 0.0000 | 2.8669 | 0.2644 | 4.0944 | 0.0546 | 1.4509 | 0 |

| nm  | THz   | eV     | Ag     |        | cSi    |        | Fe2O3  |        | GaAs   |        | TiO2   |        | P3HT:PCBM |        | CdTe   |        | aSi    |        | SiO2   |   |
|-----|-------|--------|--------|--------|--------|--------|--------|--------|--------|--------|--------|--------|-----------|--------|--------|--------|--------|--------|--------|---|
|     |       |        | n      | k      | n      | k      | n      | k      | n      | k      | n      | k      | n         | k      | n      | k      | n      | k      | n      | k |
| 840 | 356.9 | 1.4760 | 0.2576 | 5.9013 | 3.6916 | 0.0200 | 2.4485 | 0.0000 | 3.6341 | 0.1533 | 2.4345 | 0.0000 | 1.8584    | 0.0000 | 2.8665 | 0.2642 | 4.0932 | 0.0544 | 1.4509 | 0 |
| 841 | 356.5 | 1.4742 | 0.2577 | 5.9092 | 3.6911 | 0.0199 | 2.4481 | 0.0000 | 3.6336 | 0.1532 | 2.4343 | 0.0000 | 1.8581    | 0.0000 | 2.8662 | 0.2641 | 4.0921 | 0.0542 | 1.4509 | 0 |
| 842 | 356   | 1.4725 | 0.2579 | 5.9170 | 3.6905 | 0.0199 | 2.4477 | 0.0000 | 3.6332 | 0.1531 | 2.4342 | 0.0000 | 1.8577    | 0.0000 | 2.8659 | 0.2639 | 4.0909 | 0.0541 | 1.4509 | 0 |
| 843 | 355.6 | 1.4707 | 0.2580 | 5.9249 | 3.6899 | 0.0199 | 2.4472 | 0.0000 | 3.6327 | 0.1530 | 2.4340 | 0.0000 | 1.8574    | 0.0000 | 2.8655 | 0.2637 | 4.0898 | 0.0539 | 1.4509 | 0 |
| 844 | 355.2 | 1.4690 | 0.2582 | 5.9327 | 3.6893 | 0.0198 | 2.4468 | 0.0000 | 3.6323 | 0.1529 | 2.4338 | 0.0000 | 1.8571    | 0.0000 | 2.8652 | 0.2636 | 4.0886 | 0.0537 | 1.4508 | 0 |
| 845 | 354.8 | 1.4673 | 0.2583 | 5.9406 | 3.6887 | 0.0198 | 2.4464 | 0.0000 | 3.6318 | 0.1528 | 2.4337 | 0.0000 | 1.8567    | 0.0000 | 2.8648 | 0.2634 | 4.0875 | 0.0535 | 1.4508 | 0 |
| 846 | 354.4 | 1.4655 | 0.2585 | 5.9485 | 3.6882 | 0.0198 | 2.4460 | 0.0000 | 3.6314 | 0.1527 | 2.4335 | 0.0000 | 1.8564    | 0.0000 | 2.8645 | 0.2633 | 4.0863 | 0.0534 | 1.4508 | 0 |
| 847 | 353.9 | 1.4638 | 0.2587 | 5.9563 | 3.6876 | 0.0197 | 2.4456 | 0.0000 | 3.6309 | 0.1526 | 2.4334 | 0.0000 | 1.8561    | 0.0000 | 2.8642 | 0.2631 | 4.0852 | 0.0532 | 1.4508 | 0 |
| 848 | 353.5 | 1.4621 | 0.2588 | 5.9642 | 3.6870 | 0.0197 | 2.4452 | 0.0000 | 3.6305 | 0.1525 | 2.4332 | 0.0000 | 1.8558    | 0.0000 | 2.8638 | 0.2630 | 4.0841 | 0.0530 | 1.4508 | 0 |
| 849 | 353.1 | 1.4604 | 0.2590 | 5.9720 | 3.6865 | 0.0197 | 2.4447 | 0.0000 | 3.6300 | 0.1525 | 2.4330 | 0.0000 | 1.8554    | 0.0000 | 2.8635 | 0.2629 | 4.0830 | 0.0529 | 1.4508 | 0 |
| 850 | 352.7 | 1.4586 | 0.2591 | 5.9799 | 3.6859 | 0.0197 | 2.4443 | 0.0000 | 3.6296 | 0.1524 | 2.4329 | 0.0000 | 1.8551    | 0.0000 | 2.8632 | 0.2627 | 4.0819 | 0.0527 | 1.4508 | 0 |
| 851 | 352.3 | 1.4569 | 0.2593 | 5.9877 | 3.6853 | 0.0196 | 2.4439 | 0.0000 | 3.6292 | 0.1523 | 2.4327 | 0.0000 | 1.8548    | 0.0000 | 2.8629 | 0.2626 | 4.0807 | 0.0526 | 1.4508 | 0 |
| 852 | 351.9 | 1.4552 | 0.2594 | 5.9956 | 3.6848 | 0.0196 | 2.4435 | 0.0000 | 3.6287 | 0.1522 | 2.4326 | 0.0000 | 1.8545    | 0.0000 | 2.8625 | 0.2624 | 4.0796 | 0.0524 | 1.4508 | 0 |
| 853 | 351.5 | 1.4535 | 0.2596 | 6.0034 | 3.6842 | 0.0196 | 2.4431 | 0.0000 | 3.6283 | 0.1521 | 2.4324 | 0.0000 | 1.8542    | 0.0000 | 2.8622 | 0.2623 | 4.0785 | 0.0522 | 1.4507 | 0 |
| 854 | 351   | 1.4518 | 0.2597 | 6.0113 | 3.6837 | 0.0195 | 2.4427 | 0.0000 | 3.6279 | 0.1520 | 2.4323 | 0.0000 | 1.8539    | 0.0000 | 2.8619 | 0.2621 | 4.0774 | 0.0521 | 1.4507 | 0 |
| 855 | 350.6 | 1.4501 | 0.2599 | 6.0191 | 3.6831 | 0.0195 | 2.4423 | 0.0000 | 3.6275 | 0.1519 | 2.4321 | 0.0000 | 1.8535    | 0.0000 | 2.8616 | 0.2620 | 4.0764 | 0.0519 | 1.4507 | 0 |
| 856 | 350.2 | 1.4484 | 0.2600 | 6.0270 | 3.6826 | 0.0195 | 2.4419 | 0.0000 | 3.6270 | 0.1518 | 2.4319 | 0.0000 | 1.8532    | 0.0000 | 2.8612 | 0.0000 | 4.0753 | 0.0518 | 1.4507 | 0 |
| 857 | 349.8 | 1.4467 | 0.2602 | 6.0348 | 3.6820 | 0.0194 | 2.4415 | 0.0000 | 3.6266 | 0.1517 | 2.4318 | 0.0000 | 1.8529    | 0.0000 | 2.8609 | 0.0000 | 4.0742 | 0.0516 | 1.4507 | 0 |
| 858 | 349.4 | 1.4450 | 0.2603 | 6.0427 | 3.6815 | 0.0194 | 2.4411 | 0.0000 | 3.6262 | 0.1516 | 2.4316 | 0.0000 | 1.8526    | 0.0000 | 2.8606 | 0.0000 | 4.0731 | 0.0515 | 1.4507 | 0 |
| 859 | 349   | 1.4434 | 0.2605 | 6.0505 | 3.6809 | 0.0194 | 2.4408 | 0.0000 | 3.6258 | 0.1515 | 2.4315 | 0.0000 | 1.8523    | 0.0000 | 2.8603 | 0.0000 | 4.0721 | 0.0514 | 1.4507 | 0 |
| 860 | 348.6 | 1.4417 | 0.2607 | 6.0584 | 3.6804 | 0.0194 | 2.4404 | 0.0000 | 3.6254 | 0.1515 | 2.4313 | 0.0000 | 1.8520    | 0.0000 | 2.8600 | 0.0000 | 4.0710 | 0.0512 | 1.4507 | 0 |
| 861 | 348.2 | 1.4400 | 0.2608 | 6.0662 | 3.6799 | 0.0193 | 2.4400 | 0.0000 | 3.6250 | 0.1514 | 2.4312 | 0.0000 | 1.8517    | 0.0000 | 2.8597 | 0.0000 | 4.0699 | 0.0511 | 1.4507 | 0 |
| 862 | 347.8 | 1.4383 | 0.2610 | 6.0741 | 3.6793 | 0.0193 | 2.4396 | 0.0000 | 3.6246 | 0.1513 | 2.4310 | 0.0000 | 1.8514    | 0.0000 | 2.8594 | 0.0000 | 4.0689 | 0.0509 | 1.4506 | 0 |
| 863 | 347.4 | 1.4367 | 0.2611 | 6.0819 | 3.6788 | 0.0193 | 2.4392 | 0.0000 | 3.6242 | 0.1512 | 2.4309 | 0.0000 | 1.8511    | 0.0000 | 2.8591 | 0.0000 | 4.0679 | 0.0508 | 1.4506 | 0 |
| 864 | 347   | 1.4350 | 0.2613 | 6.0898 | 3.6783 | 0.0192 | 2.4388 | 0.0000 | 3.6238 | 0.1511 | 2.4307 | 0.0000 | 1.8508    | 0.0000 | 2.8587 | 0.0000 | 4.0668 | 0.0507 | 1.4506 | 0 |
| 865 | 346.6 | 1.4333 | 0.2614 | 6.0976 | 3.6777 | 0.0192 | 2.4384 | 0.0000 | 3.6234 | 0.1510 | 2.4306 | 0.0000 | 1.8505    | 0.0000 | 2.8584 | 0.0000 | 4.0658 | 0.0505 | 1.4506 | 0 |
| 866 | 346.2 | 1.4317 | 0.2616 | 6.1054 | 3.6772 | 0.0192 | 2.4381 | 0.0000 | 3.6230 | 0.1509 | 2.4304 | 0.0000 | 1.8502    | 0.0000 | 2.8581 | 0.0000 | 4.0647 | 0.0504 | 1.4506 | 0 |
| 867 | 345.8 | 1.4300 | 0.2617 | 6.1133 | 3.6767 | 0.0192 | 2.4377 | 0.0000 | 3.6226 | 0.1508 | 2.4303 | 0.0000 | 1.8500    | 0.0000 | 2.8578 | 0.0000 | 4.0637 | 0.0503 | 1.4506 | 0 |
| 868 | 345.4 | 1.4284 | 0.2619 | 6.1211 | 3.6761 | 0.0191 | 2.4373 | 0.0000 | 3.6222 | 0.1507 | 2.4301 | 0.0000 | 1.8497    | 0.0000 | 2.8575 | 0.0000 | 4.0627 | 0.0501 | 1.4506 | 0 |
| 869 | 345   | 1.4267 | 0.2620 | 6.1290 | 3.6756 | 0.0191 | 2.4369 | 0.0000 | 3.6218 | 0.1507 | 2.4300 | 0.0000 | 1.8494    | 0.0000 | 2.8572 | 0.0000 | 4.0617 | 0.0500 | 1.4506 | 0 |
| 870 | 344.6 | 1.4251 | 0.2622 | 6.1368 | 3.6751 | 0.0191 | 2.4366 | 0.0000 | 3.6214 | 0.1506 | 2.4298 | 0.0000 | 1.8491    | 0.0000 | 2.8569 | 0.0000 | 4.0607 | 0.0499 | 1.4506 | 0 |
| 871 | 344.2 | 1.4235 | 0.2623 | 6.1447 | 3.6746 | 0.0190 | 2.4362 | 0.0000 | 3.6210 | 0.1505 | 2.4297 | 0.0000 | 1.8488    | 0.0000 | 2.8566 | 0.0000 | 4.0597 | 0.0498 | 1.4506 | 0 |

| nm  | THz   | eV     | Ag     |        | cSi    |        | Fe2O3  |        | GaAs   |        | TiO2   |        | P3HT:PCBM |        | CdTe   |        | aSi    |        | SiO2   |   |
|-----|-------|--------|--------|--------|--------|--------|--------|--------|--------|--------|--------|--------|-----------|--------|--------|--------|--------|--------|--------|---|
|     |       |        | n      | k      | n      | k      | n      | k      | n      | k      | n      | k      | n         | k      | n      | k      | n      | k      | n      | k |
| 872 | 343.8 | 1.4218 | 0.2625 | 6.1525 | 3.6741 | 0.0190 | 2.4358 | 0.0000 | 3.6206 | 0.1504 | 2.4295 | 0.0000 | 1.8485    | 0.0000 | 2.8563 | 0.0000 | 4.0587 | 0.0496 | 1.4505 | 0 |
| 873 | 343.4 | 1.4202 | 0.2626 | 6.1603 | 3.6736 | 0.0190 | 2.4355 | 0.0000 | 3.6202 | 0.1503 | 2.4294 | 0.0000 | 1.8483    | 0.0000 | 2.8560 | 0.0000 | 4.0577 | 0.0495 | 1.4505 | 0 |
| 874 | 343   | 1.4186 | 0.2628 | 6.1682 | 3.6731 | 0.0190 | 2.4351 | 0.0000 | 3.6198 | 0.0000 | 2.4292 | 0.0000 | 1.8480    | 0.0000 | 2.8557 | 0.0000 | 4.0567 | 0.0494 | 1.4505 | 0 |
| 875 | 342.6 | 1.4170 | 0.2630 | 6.1760 | 3.6725 | 0.0189 | 2.4348 | 0.0000 | 3.6195 | 0.0000 | 2.4291 | 0.0000 | 1.8477    | 0.0000 | 2.8555 | 0.0000 | 4.0557 | 0.0493 | 1.4505 | 0 |
| 876 | 342.2 | 1.4153 | 0.2631 | 6.1839 | 3.6720 | 0.0189 | 2.4344 | 0.0000 | 3.6191 | 0.0000 | 2.4290 | 0.0000 | 1.8474    | 0.0000 | 2.8552 | 0.0000 | 4.0547 | 0.0492 | 1.4505 | 0 |
| 877 | 341.8 | 1.4137 | 0.2633 | 6.1917 | 3.6715 | 0.0189 | 2.4340 | 0.0000 | 3.6187 | 0.0000 | 2.4288 | 0.0000 | 1.8472    | 0.0000 | 2.8549 | 0.0000 | 4.0537 | 0.0491 | 1.4505 | 0 |
| 878 | 341.4 | 1.4121 | 0.2634 | 6.1995 | 3.6710 | 0.0189 | 2.4337 | 0.0000 | 3.6183 | 0.0000 | 2.4287 | 0.0000 | 1.8469    | 0.0000 | 2.8546 | 0.0000 | 4.0528 | 0.0489 | 1.4505 | 0 |
| 879 | 341.1 | 1.4105 | 0.2636 | 6.2074 | 3.6705 | 0.0188 | 2.4333 | 0.0000 | 3.6180 | 0.0000 | 2.4285 | 0.0000 | 1.8466    | 0.0000 | 2.8543 | 0.0000 | 4.0518 | 0.0488 | 1.4505 | 0 |
| 880 | 340.7 | 1.4089 | 0.2637 | 6.2152 | 3.6700 | 0.0188 | 2.4330 | 0.0000 | 3.6176 | 0.0000 | 2.4284 | 0.0000 | 1.8463    | 0.0000 | 2.8540 | 0.0000 | 4.0508 | 0.0487 | 1.4505 | 0 |
| 881 | 340.3 | 1.4073 | 0.2639 | 6.2230 | 3.6695 | 0.0188 | 2.4326 | 0.0000 | 3.6172 | 0.0000 | 2.4282 | 0.0000 | 1.8461    | 0.0000 | 2.8537 | 0.0000 | 4.0499 | 0.0486 | 1.4505 | 0 |
| 882 | 339.9 | 1.4057 | 0.2640 | 6.2309 | 3.6690 | 0.0187 | 2.4323 | 0.0000 | 3.6168 | 0.0000 | 2.4281 | 0.0000 | 1.8458    | 0.0000 | 2.8534 | 0.0000 | 4.0489 | 0.0485 | 1.4504 | 0 |
| 883 | 339.5 | 1.4041 | 0.2642 | 6.2387 | 3.6686 | 0.0187 | 2.4319 | 0.0000 | 3.6165 | 0.0000 | 2.4280 | 0.0000 | 1.8456    | 0.0000 | 2.8532 | 0.0000 | 4.0480 | 0.0484 | 1.4504 | 0 |
| 884 | 339.1 | 1.4025 | 0.2643 | 6.2465 | 3.6681 | 0.0187 | 2.4316 | 0.0000 | 3.6161 | 0.0000 | 2.4278 | 0.0000 | 1.8453    | 0.0000 | 2.8529 | 0.0000 | 4.0470 | 0.0483 | 1.4504 | 0 |
| 885 | 338.7 | 1.4010 | 0.2645 | 6.2544 | 3.6676 | 0.0187 | 2.4312 | 0.0000 | 3.6158 | 0.0000 | 2.4277 | 0.0000 | 1.8450    | 0.0000 | 2.8526 | 0.0000 | 4.0461 | 0.0482 | 1.4504 | 0 |
| 886 | 338.4 | 1.3994 | 0.2646 | 6.2622 | 3.6671 | 0.0186 | 2.4309 | 0.0000 | 3.6154 | 0.0000 | 2.4275 | 0.0000 | 1.8448    | 0.0000 | 2.8523 | 0.0000 | 4.0452 | 0.0481 | 1.4504 | 0 |
| 887 | 338   | 1.3978 | 0.2648 | 6.2700 | 3.6666 | 0.0186 | 2.4305 | 0.0000 | 3.6150 | 0.0000 | 2.4274 | 0.0000 | 1.8445    | 0.0000 | 2.8521 | 0.0000 | 4.0442 | 0.0480 | 1.4504 | 0 |
| 888 | 337.6 | 1.3962 | 0.2650 | 6.2779 | 3.6661 | 0.0186 | 2.4302 | 0.0000 | 3.6147 | 0.0000 | 2.4273 | 0.0000 | 1.8443    | 0.0000 | 2.8518 | 0.0000 | 4.0433 | 0.0479 | 1.4504 | 0 |
| 889 | 337.2 | 1.3946 | 0.2651 | 6.2857 | 3.6656 | 0.0186 | 2.4299 | 0.0000 | 3.6143 | 0.0000 | 2.4271 | 0.0000 | 1.8440    | 0.0000 | 2.8515 | 0.0000 | 4.0424 | 0.0478 | 1.4504 | 0 |
| 890 | 336.8 | 1.3931 | 0.2653 | 6.2935 | 3.6652 | 0.0185 | 2.4295 | 0.0000 | 3.6140 | 0.0000 | 2.4270 | 0.0000 | 1.8437    | 0.0000 | 2.8512 | 0.0000 | 4.0415 | 0.0477 | 1.4504 | 0 |
| 891 | 336.5 | 1.3915 | 0.2654 | 6.3014 | 3.6647 | 0.0185 | 2.4292 | 0.0000 | 3.6136 | 0.0000 | 2.4269 | 0.0000 | 1.8435    | 0.0000 | 2.8510 | 0.0000 | 4.0405 | 0.0476 | 1.4504 | 0 |
| 892 | 336.1 | 1.3900 | 0.2656 | 6.3092 | 3.6642 | 0.0185 | 2.4289 | 0.0000 | 3.6133 | 0.0000 | 2.4267 | 0.0000 | 1.8432    | 0.0000 | 2.8507 | 0.0000 | 4.0396 | 0.0475 | 1.4503 | 0 |
| 893 | 335.7 | 1.3884 | 0.2657 | 6.3170 | 3.6637 | 0.0185 | 2.4285 | 0.0000 | 3.6129 | 0.0000 | 2.4266 | 0.0000 | 1.8430    | 0.0000 | 2.8504 | 0.0000 | 4.0387 | 0.0474 | 1.4503 | 0 |
| 894 | 335.3 | 1.3868 | 0.2659 | 6.3249 | 3.6633 | 0.0184 | 2.4282 | 0.0000 | 3.6126 | 0.0000 | 2.4265 | 0.0000 | 1.8427    | 0.0000 | 2.8502 | 0.0000 | 4.0378 | 0.0473 | 1.4503 | 0 |
| 895 | 335   | 1.3853 | 0.2660 | 6.3327 | 3.6628 | 0.0184 | 2.4279 | 0.0000 | 3.6122 | 0.0000 | 2.4263 | 0.0000 | 1.8425    | 0.0000 | 2.8499 | 0.0000 | 4.0369 | 0.0472 | 1.4503 | 0 |
| 896 | 334.6 | 1.3838 | 0.2662 | 6.3405 | 3.6623 | 0.0184 | 2.4276 | 0.0000 | 3.6119 | 0.0000 | 2.4262 | 0.0000 | 1.8423    | 0.0000 | 2.8496 | 0.0000 | 4.0360 | 0.0471 | 1.4503 | 0 |
| 897 | 334.2 | 1.3822 | 0.2663 | 6.3483 | 3.6619 | 0.0184 | 2.4272 | 0.0000 | 3.6116 | 0.0000 | 2.4261 | 0.0000 | 1.8420    | 0.0000 | 2.8494 | 0.0000 | 4.0351 | 0.0471 | 1.4503 | 0 |
| 898 | 333.8 | 1.3807 | 0.2665 | 6.3562 | 3.6614 | 0.0183 | 2.4269 | 0.0000 | 3.6112 | 0.0000 | 2.4259 | 0.0000 | 1.8418    | 0.0000 | 2.8491 | 0.0000 | 4.0343 | 0.0470 | 1.4503 | 0 |
| 899 | 333.5 | 1.3791 | 0.2666 | 6.3640 | 3.6609 | 0.0183 | 2.4266 | 0.0000 | 3.6109 | 0.0000 | 2.4258 | 0.0000 | 1.8415    | 0.0000 | 2.8488 | 0.0000 | 4.0334 | 0.0469 | 1.4503 | 0 |
| 900 | 333.1 | 1.3776 | 0.2668 | 6.3718 | 3.6605 | 0.0183 | 2.4263 | 0.0000 | 3.6106 | 0.0000 | 2.4257 | 0.0000 | 1.8413    | 0.0000 | 2.8486 | 0.0000 | 4.0325 | 0.0468 | 1.4503 | 0 |
| 901 | 332.7 | 1.3761 | 0.2670 | 6.3796 | 3.6600 | 0.0182 | 2.4259 | 0.0000 | 3.6102 | 0.0000 | 2.4255 | 0.0000 | 1.8410    | 0.0000 | 2.8483 | 0.0000 | 4.0316 | 0.0467 | 1.4503 | 0 |
| 902 | 332.4 | 1.3745 | 0.2671 | 6.3875 | 3.6596 | 0.0182 | 2.4256 | 0.0000 | 3.6099 | 0.0000 | 2.4254 | 0.0000 | 1.8408    | 0.0000 | 2.8481 | 0.0000 | 4.0308 | 0.0466 | 1.4503 | 0 |
| 903 | 332   | 1.3730 | 0.2673 | 6.3953 | 3.6591 | 0.0182 | 2.4253 | 0.0000 | 3.6096 | 0.0000 | 2.4253 | 0.0000 | 1.8406    | 0.0000 | 2.8478 | 0.0000 | 4.0299 | 0.0465 | 1.4502 | 0 |

| nm  | THz   | eV     | Ag     |        | cSi    |        | Fe2O3  |        | GaAs   |        | TiO2   |        | P3HT:PCBM |        | CdTe   |        | aSi    |        | SiO2   |   |
|-----|-------|--------|--------|--------|--------|--------|--------|--------|--------|--------|--------|--------|-----------|--------|--------|--------|--------|--------|--------|---|
|     |       |        | n      | k      | n      | k      | n      | k      | n      | k      | n      | k      | n         | k      | n      | k      | n      | k      | n      | k |
| 904 | 331.6 | 1.3715 | 0.2674 | 6.4031 | 3.6586 | 0.0182 | 2.4250 | 0.0000 | 3.6092 | 0.0000 | 2.4251 | 0.0000 | 1.8403    | 0.0000 | 2.8476 | 0.0000 | 4.0290 | 0.0465 | 1.4502 | 0 |
| 905 | 331.3 | 1.3700 | 0.2676 | 6.4110 | 3.6582 | 0.0181 | 2.4247 | 0.0000 | 3.6089 | 0.0000 | 2.4250 | 0.0000 | 1.8401    | 0.0000 | 2.8473 | 0.0000 | 4.0282 | 0.0464 | 1.4502 | 0 |
| 906 | 330.9 | 1.3685 | 0.2677 | 6.4188 | 3.6577 | 0.0181 | 2.4244 | 0.0000 | 3.6086 | 0.0000 | 2.4249 | 0.0000 | 1.8399    | 0.0000 | 2.8471 | 0.0000 | 4.0273 | 0.0463 | 1.4502 | 0 |
| 907 | 330.5 | 1.3670 | 0.2679 | 6.4266 | 3.6573 | 0.0181 | 2.4241 | 0.0000 | 3.6083 | 0.0000 | 2.4247 | 0.0000 | 1.8396    | 0.0000 | 2.8468 | 0.0000 | 4.0265 | 0.0462 | 1.4502 | 0 |
| 908 | 330.2 | 1.3655 | 0.2680 | 6.4344 | 3.6569 | 0.0181 | 2.4237 | 0.0000 | 3.6079 | 0.0000 | 2.4246 | 0.0000 | 1.8394    | 0.0000 | 2.8466 | 0.0000 | 4.0256 | 0.0462 | 1.4502 | 0 |
| 909 | 329.8 | 1.3640 | 0.2682 | 6.4422 | 3.6564 | 0.0181 | 2.4234 | 0.0000 | 3.6076 | 0.0000 | 2.4245 | 0.0000 | 1.8392    | 0.0000 | 2.8463 | 0.0000 | 4.0248 | 0.0461 | 1.4502 | 0 |
| 910 | 329.4 | 1.3625 | 0.2683 | 6.4501 | 3.6560 | 0.0180 | 2.4231 | 0.0000 | 3.6073 | 0.0000 | 2.4244 | 0.0000 | 1.8389    | 0.0000 | 2.8461 | 0.0000 | 4.0240 | 0.0460 | 1.4502 | 0 |
| 911 | 329.1 | 1.3610 | 0.2685 | 6.4579 | 3.6555 | 0.0180 | 2.4228 | 0.0000 | 3.6070 | 0.0000 | 2.4242 | 0.0000 | 1.8387    | 0.0000 | 2.8458 | 0.0000 | 4.0231 | 0.0459 | 1.4502 | 0 |
| 912 | 328.7 | 1.3595 | 0.2686 | 6.4657 | 3.6551 | 0.0180 | 2.4225 | 0.0000 | 3.6067 | 0.0000 | 2.4241 | 0.0000 | 1.8385    | 0.0000 | 2.8456 | 0.0000 | 4.0223 | 0.0459 | 1.4502 | 0 |
| 913 | 328.4 | 1.3580 | 0.2688 | 6.4735 | 3.6546 | 0.0180 | 2.4222 | 0.0000 | 3.6064 | 0.0000 | 2.4240 | 0.0000 | 1.8383    | 0.0000 | 2.8453 | 0.0000 | 4.0215 | 0.0458 | 1.4502 | 0 |
| 914 | 328   | 1.3565 | 0.2690 | 6.4814 | 3.6542 | 0.0179 | 2.4219 | 0.0000 | 3.6060 | 0.0000 | 2.4239 | 0.0000 | 1.8380    | 0.0000 | 2.8451 | 0.0000 | 4.0207 | 0.0457 | 1.4501 | 0 |
| 915 | 327.6 | 1.3550 | 0.2691 | 6.4892 | 3.6538 | 0.0179 | 2.4216 | 0.0000 | 3.6057 | 0.0000 | 2.4237 | 0.0000 | 1.8378    | 0.0000 | 2.8448 | 0.0000 | 4.0198 | 0.0456 | 1.4501 | 0 |
| 916 | 327.3 | 1.3535 | 0.2693 | 6.4970 | 3.6533 | 0.0179 | 2.4213 | 0.0000 | 3.6054 | 0.0000 | 2.4236 | 0.0000 | 1.8376    | 0.0000 | 2.8446 | 0.0000 | 4.0190 | 0.0456 | 1.4501 | 0 |
| 917 | 326.9 | 1.3521 | 0.2694 | 6.5048 | 3.6529 | 0.0179 | 2.4210 | 0.0000 | 3.6051 | 0.0000 | 2.4235 | 0.0000 | 1.8374    | 0.0000 | 2.8444 | 0.0000 | 4.0182 | 0.0455 | 1.4501 | 0 |
| 918 | 326.6 | 1.3506 | 0.2696 | 6.5126 | 3.6525 | 0.0178 | 2.4207 | 0.0000 | 3.6048 | 0.0000 | 2.4234 | 0.0000 | 1.8372    | 0.0000 | 2.8441 | 0.0000 | 4.0174 | 0.0454 | 1.4501 | 0 |
| 919 | 326.2 | 1.3491 | 0.2697 | 6.5205 | 3.6521 | 0.0178 | 2.4204 | 0.0000 | 3.6045 | 0.0000 | 2.4232 | 0.0000 | 1.8369    | 0.0000 | 2.8439 | 0.0000 | 4.0166 | 0.0454 | 1.4501 | 0 |
| 920 | 325.9 | 1.3477 | 0.2699 | 6.5283 | 3.6516 | 0.0178 | 2.4201 | 0.0000 | 3.6042 | 0.0000 | 2.4231 | 0.0000 | 1.8367    | 0.0000 | 2.8437 | 0.0000 | 4.0158 | 0.0453 | 1.4501 | 0 |
| 921 | 325.5 | 1.3462 | 0.2700 | 6.5361 | 3.6512 | 0.0178 | 2.4199 | 0.0000 | 3.6039 | 0.0000 | 2.4230 | 0.0000 | 1.8365    | 0.0000 | 2.8434 | 0.0000 | 4.0150 | 0.0452 | 1.4501 | 0 |
| 922 | 325.2 | 1.3447 | 0.2702 | 6.5439 | 3.6508 | 0.0177 | 2.4196 | 0.0000 | 3.6036 | 0.0000 | 2.4229 | 0.0000 | 1.8363    | 0.0000 | 2.8432 | 0.0000 | 4.0142 | 0.0452 | 1.4501 | 0 |
| 923 | 324.8 | 1.3433 | 0.2703 | 6.5517 | 3.6504 | 0.0177 | 2.4193 | 0.0000 | 3.6033 | 0.0000 | 2.4228 | 0.0000 | 1.8361    | 0.0000 | 2.8430 | 0.0000 | 4.0134 | 0.0451 | 1.4501 | 0 |
| 924 | 324.5 | 1.3418 | 0.2705 | 6.5596 | 3.6499 | 0.0177 | 2.4190 | 0.0000 | 3.6030 | 0.0000 | 2.4226 | 0.0000 | 1.8359    | 0.0000 | 2.8427 | 0.0000 | 4.0127 | 0.0451 | 1.4501 | 0 |
| 925 | 324.1 | 1.3404 | 0.2707 | 6.5674 | 3.6495 | 0.0177 | 2.4187 | 0.0000 | 3.6027 | 0.0000 | 2.4225 | 0.0000 | 1.8357    | 0.0000 | 2.8425 | 0.0000 | 4.0119 | 0.0450 | 1.4501 | 0 |
| 926 | 323.8 | 1.3389 | 0.2708 | 6.5752 | 3.6491 | 0.0176 | 2.4184 | 0.0000 | 3.6024 | 0.0000 | 2.4224 | 0.0000 | 1.8355    | 0.0000 | 2.8423 | 0.0000 | 4.0111 | 0.0449 | 1.4500 | 0 |
| 927 | 323.4 | 1.3375 | 0.2710 | 6.5830 | 3.6487 | 0.0176 | 2.4181 | 0.0000 | 3.6021 | 0.0000 | 2.4223 | 0.0000 | 1.8352    | 0.0000 | 2.8420 | 0.0000 | 4.0103 | 0.0449 | 1.4500 | 0 |
| 928 | 323.1 | 1.3360 | 0.2711 | 6.5908 | 3.6483 | 0.0176 | 2.4179 | 0.0000 | 3.6018 | 0.0000 | 2.4222 | 0.0000 | 1.8350    | 0.0000 | 2.8418 | 0.0000 | 4.0096 | 0.0448 | 1.4500 | 0 |
| 929 | 322.7 | 1.3346 | 0.2713 | 6.5986 | 3.6479 | 0.0176 | 2.4176 | 0.0000 | 3.6015 | 0.0000 | 2.4220 | 0.0000 | 1.8348    | 0.0000 | 2.8416 | 0.0000 | 4.0088 | 0.0448 | 1.4500 | 0 |
| 930 | 322.4 | 1.3332 | 0.2714 | 6.6065 | 3.6475 | 0.0176 | 2.4173 | 0.0000 | 3.6013 | 0.0000 | 2.4219 | 0.0000 | 1.8346    | 0.0000 | 2.8414 | 0.0000 | 4.0080 | 0.0447 | 1.4500 | 0 |
| 931 | 322   | 1.3317 | 0.2716 | 6.6143 | 3.6470 | 0.0175 | 2.4170 | 0.0000 | 3.6010 | 0.0000 | 2.4218 | 0.0000 | 1.8344    | 0.0000 | 2.8411 | 0.0000 | 4.0073 | 0.0447 | 1.4500 | 0 |
| 932 | 321.7 | 1.3303 | 0.2717 | 6.6221 | 3.6466 | 0.0175 | 2.4167 | 0.0000 | 3.6007 | 0.0000 | 2.4217 | 0.0000 | 1.8342    | 0.0000 | 2.8409 | 0.0000 | 4.0065 | 0.0446 | 1.4500 | 0 |
| 933 | 321.3 | 1.3289 | 0.2719 | 6.6299 | 3.6462 | 0.0175 | 2.4165 | 0.0000 | 3.6004 | 0.0000 | 2.4216 | 0.0000 | 1.8340    | 0.0000 | 2.8407 | 0.0000 | 4.0058 | 0.0445 | 1.4500 | 0 |
| 934 | 321   | 1.3275 | 0.2720 | 6.6377 | 3.6458 | 0.0175 | 2.4162 | 0.0000 | 3.6001 | 0.0000 | 2.4215 | 0.0000 | 1.8338    | 0.0000 | 2.8405 | 0.0000 | 4.0050 | 0.0445 | 1.4500 | 0 |
| 935 | 320.6 | 1.3260 | 0.2722 | 6.6455 | 3.6454 | 0.0174 | 2.4159 | 0.0000 | 3.5998 | 0.0000 | 2.4213 | 0.0000 | 1.8336    | 0.0000 | 2.8403 | 0.0000 | 4.0043 | 0.0444 | 1.4500 | 0 |

| nm  | THz   | eV     | Ag     |        | cSi    |        | Fe2O3  |        | GaAs   |        | TiO2   |        | P3HT:PCBM |        | CdTe   |        | aSi    |        | SiO2   |   |
|-----|-------|--------|--------|--------|--------|--------|--------|--------|--------|--------|--------|--------|-----------|--------|--------|--------|--------|--------|--------|---|
|     |       |        | n      | k      | n      | k      | n      | k      | n      | k      | n      | k      | n         | k      | n      | k      | n      | k      | n      | k |
| 936 | 320.3 | 1.3246 | 0.2724 | 6.6534 | 3.6450 | 0.0174 | 2.4156 | 0.0000 | 3.5996 | 0.0000 | 2.4212 | 0.0000 | 1.8334    | 0.0000 | 2.8400 | 0.0000 | 4.0035 | 0.0444 | 1.4500 | 0 |
| 937 | 319.9 | 1.3232 | 0.2725 | 6.6612 | 3.6446 | 0.0174 | 2.4154 | 0.0000 | 3.5993 | 0.0000 | 2.4211 | 0.0000 | 1.8332    | 0.0000 | 2.8398 | 0.0000 | 4.0028 | 0.0443 | 1.4500 | 0 |
| 938 | 319.6 | 1.3218 | 0.2727 | 6.6690 | 3.6442 | 0.0174 | 2.4151 | 0.0000 | 3.5990 | 0.0000 | 2.4210 | 0.0000 | 1.8330    | 0.0000 | 2.8396 | 0.0000 | 4.0021 | 0.0443 | 1.4499 | 0 |
| 939 | 319.3 | 1.3204 | 0.2728 | 6.6768 | 3.6438 | 0.0173 | 2.4148 | 0.0000 | 3.5987 | 0.0000 | 2.4209 | 0.0000 | 1.8328    | 0.0000 | 2.8394 | 0.0000 | 4.0013 | 0.0442 | 1.4499 | 0 |
| 940 | 318.9 | 1.3190 | 0.2730 | 6.6846 | 3.6434 | 0.0173 | 2.4146 | 0.0000 | 3.5984 | 0.0000 | 2.4208 | 0.0000 | 1.8326    | 0.0000 | 2.8392 | 0.0000 | 4.0006 | 0.0442 | 1.4499 | 0 |
| 941 | 318.6 | 1.3176 | 0.2731 | 6.6924 | 3.6430 | 0.0173 | 2.4143 | 0.0000 | 3.5982 | 0.0000 | 2.4207 | 0.0000 | 1.8324    | 0.0000 | 2.8390 | 0.0000 | 3.9999 | 0.0441 | 1.4499 | 0 |
| 942 | 318.3 | 1.3162 | 0.2733 | 6.7002 | 3.6426 | 0.0173 | 2.4140 | 0.0000 | 3.5979 | 0.0000 | 2.4205 | 0.0000 | 1.8322    | 0.0000 | 2.8387 | 0.0000 | 3.9992 | 0.0441 | 1.4499 | 0 |
| 943 | 317.9 | 1.3148 | 0.2734 | 6.7081 | 3.6423 | 0.0173 | 2.4138 | 0.0000 | 3.5976 | 0.0000 | 2.4204 | 0.0000 | 1.8320    | 0.0000 | 2.8385 | 0.0000 | 3.9984 | 0.0440 | 1.4499 | 0 |
| 944 | 317.6 | 1.3134 | 0.2736 | 6.7159 | 3.6419 | 0.0172 | 2.4135 | 0.0000 | 3.5974 | 0.0000 | 2.4203 | 0.0000 | 1.8318    | 0.0000 | 2.8383 | 0.0000 | 3.9977 | 0.0440 | 1.4499 | 0 |
| 945 | 317.2 | 1.3120 | 0.2738 | 6.7237 | 3.6415 | 0.0172 | 2.4133 | 0.0000 | 3.5971 | 0.0000 | 2.4202 | 0.0000 | 1.8317    | 0.0000 | 2.8381 | 0.0000 | 3.9970 | 0.0439 | 1.4499 | 0 |
| 946 | 316.9 | 1.3106 | 0.2739 | 6.7315 | 3.6411 | 0.0172 | 2.4130 | 0.0000 | 3.5968 | 0.0000 | 2.4201 | 0.0000 | 1.8315    | 0.0000 | 2.8379 | 0.0000 | 3.9963 | 0.0439 | 1.4499 | 0 |
| 947 | 316.6 | 1.3092 | 0.2741 | 6.7393 | 3.6407 | 0.0172 | 2.4127 | 0.0000 | 3.5966 | 0.0000 | 2.4200 | 0.0000 | 1.8313    | 0.0000 | 2.8377 | 0.0000 | 3.9956 | 0.0438 | 1.4499 | 0 |
| 948 | 316.2 | 1.3079 | 0.2742 | 6.7471 | 3.6403 | 0.0171 | 2.4125 | 0.0000 | 3.5963 | 0.0000 | 2.4199 | 0.0000 | 1.8311    | 0.0000 | 2.8375 | 0.0000 | 3.9949 | 0.0438 | 1.4499 | 0 |
| 949 | 315.9 | 1.3065 | 0.2744 | 6.7549 | 3.6399 | 0.0171 | 2.4122 | 0.0000 | 3.5960 | 0.0000 | 2.4198 | 0.0000 | 1.8309    | 0.0000 | 2.8373 | 0.0000 | 3.9942 | 0.0438 | 1.4499 | 0 |
| 950 | 315.6 | 1.3051 | 0.2745 | 6.7627 | 3.6396 | 0.0171 | 2.4120 | 0.0000 | 3.5958 | 0.0000 | 2.4196 | 0.0000 | 1.8307    | 0.0000 | 2.8371 | 0.0000 | 3.9935 | 0.0437 | 1.4499 | 0 |
| 951 | 315.2 | 1.3037 | 0.2747 | 6.7706 | 3.6392 | 0.0171 | 2.4117 | 0.0000 | 3.5955 | 0.0000 | 2.4195 | 0.0000 | 1.8305    | 0.0000 | 2.8369 | 0.0000 | 3.9928 | 0.0437 | 1.4498 | 0 |
| 952 | 314.9 | 1.3024 | 0.2748 | 6.7784 | 3.6388 | 0.0171 | 2.4115 | 0.0000 | 3.5953 | 0.0000 | 2.4194 | 0.0000 | 1.8303    | 0.0000 | 2.8367 | 0.0000 | 3.9921 | 0.0436 | 1.4498 | 0 |
| 953 | 314.6 | 1.3010 | 0.2750 | 6.7862 | 3.6384 | 0.0170 | 2.4112 | 0.0000 | 3.5950 | 0.0000 | 2.4193 | 0.0000 | 1.8302    | 0.0000 | 2.8365 | 0.0000 | 3.9914 | 0.0436 | 1.4498 | 0 |
| 954 | 314.2 | 1.2996 | 0.2752 | 6.7940 | 3.6380 | 0.0170 | 2.4110 | 0.0000 | 3.5947 | 0.0000 | 2.4192 | 0.0000 | 1.8300    | 0.0000 | 2.8363 | 0.0000 | 3.9907 | 0.0435 | 1.4498 | 0 |
| 955 | 313.9 | 1.2983 | 0.2753 | 6.8018 | 3.6377 | 0.0170 | 2.4107 | 0.0000 | 3.5945 | 0.0000 | 2.4191 | 0.0000 | 1.8298    | 0.0000 | 2.8361 | 0.0000 | 3.9901 | 0.0435 | 1.4498 | 0 |
| 956 | 313.6 | 1.2969 | 0.2755 | 6.8096 | 3.6373 | 0.0170 | 2.4105 | 0.0000 | 3.5942 | 0.0000 | 2.4190 | 0.0000 | 1.8296    | 0.0000 | 2.8359 | 0.0000 | 3.9894 | 0.0435 | 1.4498 | 0 |
| 957 | 313.3 | 1.2956 | 0.2756 | 6.8174 | 3.6369 | 0.0170 | 2.4102 | 0.0000 | 3.5940 | 0.0000 | 2.4189 | 0.0000 | 1.8294    | 0.0000 | 2.8357 | 0.0000 | 3.9887 | 0.0434 | 1.4498 | 0 |
| 958 | 312.9 | 1.2942 | 0.2758 | 6.8252 | 3.6365 | 0.0169 | 2.4100 | 0.0000 | 3.5937 | 0.0000 | 2.4188 | 0.0000 | 1.8292    | 0.0000 | 2.8355 | 0.0000 | 3.9880 | 0.0434 | 1.4498 | 0 |
| 959 | 312.6 | 1.2928 | 0.2759 | 6.8330 | 3.6362 | 0.0169 | 2.4097 | 0.0000 | 3.5935 | 0.0000 | 2.4187 | 0.0000 | 1.8291    | 0.0000 | 2.8353 | 0.0000 | 3.9874 | 0.0434 | 1.4498 | 0 |
| 960 | 312.3 | 1.2915 | 0.2761 | 6.8408 | 3.6358 | 0.0169 | 2.4095 | 0.0000 | 3.5932 | 0.0000 | 2.4186 | 0.0000 | 1.8289    | 0.0000 | 2.8351 | 0.0000 | 3.9867 | 0.0433 | 1.4498 | 0 |
| 961 | 312   | 1.2902 | 0.2762 | 6.8487 | 3.6354 | 0.0169 | 2.4092 | 0.0000 | 3.5930 | 0.0000 | 2.4185 | 0.0000 | 1.8287    | 0.0000 | 2.8349 | 0.0000 | 3.9860 | 0.0433 | 1.4498 | 0 |
| 962 | 311.6 | 1.2888 | 0.2764 | 6.8565 | 3.6351 | 0.0168 | 2.4090 | 0.0000 | 3.5927 | 0.0000 | 2.4184 | 0.0000 | 1.8285    | 0.0000 | 2.8347 | 0.0000 | 3.9854 | 0.0432 | 1.4498 | 0 |
| 963 | 311.3 | 1.2875 | 0.2766 | 6.8643 | 3.6347 | 0.0168 | 2.4088 | 0.0000 | 3.5925 | 0.0000 | 2.4182 | 0.0000 | 1.8284    | 0.0000 | 2.8345 | 0.0000 | 3.9847 | 0.0432 | 1.4498 | 0 |
| 964 | 311   | 1.2861 | 0.2767 | 6.8721 | 3.6344 | 0.0168 | 2.4085 | 0.0000 | 3.5922 | 0.0000 | 2.4181 | 0.0000 | 1.8282    | 0.0000 | 2.8343 | 0.0000 | 3.9841 | 0.0432 | 1.4497 | 0 |
| 965 | 310.7 | 1.2848 | 0.2769 | 6.8799 | 3.6340 | 0.0168 | 2.4083 | 0.0000 | 3.5920 | 0.0000 | 2.4180 | 0.0000 | 1.8280    | 0.0000 | 2.8341 | 0.0000 | 3.9834 | 0.0431 | 1.4497 | 0 |
| 966 | 310.3 | 1.2835 | 0.2770 | 6.8877 | 3.6336 | 0.0168 | 2.4080 | 0.0000 | 3.5917 | 0.0000 | 2.4179 | 0.0000 | 1.8278    | 0.0000 | 2.8340 | 0.0000 | 3.9828 | 0.0431 | 1.4497 | 0 |
| 967 | 310   | 1.2822 | 0.2772 | 6.8955 | 3.6333 | 0.0167 | 2.4078 | 0.0000 | 3.5915 | 0.0000 | 2.4178 | 0.0000 | 1.8277    | 0.0000 | 2.8338 | 0.0000 | 3.9821 | 0.0431 | 1.4497 | 0 |



| nm  | THz   | eV     | Ag     |        | cSi    |        | Fe2O3  |        | GaAs   |        | TiO2   |        | P3HT:PCBM |        | CdTe   |        | aSi    |        | SiO2   |   |
|-----|-------|--------|--------|--------|--------|--------|--------|--------|--------|--------|--------|--------|-----------|--------|--------|--------|--------|--------|--------|---|
|     |       |        | n      | k      | n      | k      | n      | k      | n      | k      | n      | k      | n         | k      | n      | k      | n      | k      | n      | k |
| 968 | 309.7 | 1.2808 | 0.2773 | 6.9033 | 3.6329 | 0.0167 | 2.4076 | 0.0000 | 3.5913 | 0.0000 | 2.4177 | 0.0000 | 1.8275    | 0.0000 | 2.8336 | 0.0000 | 3.9815 | 0.0430 | 1.4497 | 0 |
| 969 | 309.4 | 1.2795 | 0.2775 | 6.9111 | 3.6326 | 0.0167 | 2.4073 | 0.0000 | 3.5910 | 0.0000 | 2.4176 | 0.0000 | 1.8273    | 0.0000 | 2.8334 | 0.0000 | 3.9808 | 0.0430 | 1.4497 | 0 |
| 970 | 309.1 | 1.2782 | 0.2777 | 6.9189 | 3.6322 | 0.0167 | 2.4071 | 0.0000 | 3.5908 | 0.0000 | 2.4175 | 0.0000 | 1.8271    | 0.0000 | 2.8332 | 0.0000 | 3.9802 | 0.0430 | 1.4497 | 0 |
| 971 | 308.7 | 1.2769 | 0.2778 | 6.9267 | 3.6318 | 0.0167 | 2.4069 | 0.0000 | 3.5905 | 0.0000 | 2.4174 | 0.0000 | 1.8270    | 0.0000 | 2.8330 | 0.0000 | 3.9795 | 0.0429 | 1.4497 | 0 |
| 972 | 308.4 | 1.2756 | 0.2780 | 6.9346 | 3.6315 | 0.0166 | 2.4066 | 0.0000 | 3.5903 | 0.0000 | 2.4173 | 0.0000 | 1.8268    | 0.0000 | 2.8328 | 0.0000 | 3.9789 | 0.0429 | 1.4497 | 0 |
| 973 | 308.1 | 1.2742 | 0.2781 | 6.9424 | 3.6311 | 0.0166 | 2.4064 | 0.0000 | 3.5901 | 0.0000 | 2.4172 | 0.0000 | 1.8266    | 0.0000 | 2.8327 | 0.0000 | 3.9783 | 0.0429 | 1.4497 | 0 |
| 974 | 307.8 | 1.2729 | 0.2783 | 6.9502 | 3.6308 | 0.0166 | 2.4062 | 0.0000 | 3.5898 | 0.0000 | 2.4171 | 0.0000 | 1.8265    | 0.0000 | 2.8325 | 0.0000 | 3.9777 | 0.0428 | 1.4497 | 0 |
| 975 | 307.5 | 1.2716 | 0.2784 | 6.9580 | 3.6304 | 0.0166 | 2.4059 | 0.0000 | 3.5896 | 0.0000 | 2.4170 | 0.0000 | 1.8263    | 0.0000 | 2.8323 | 0.0000 | 3.9770 | 0.0428 | 1.4497 | 0 |
| 976 | 307.2 | 1.2703 | 0.2786 | 6.9658 | 3.6301 | 0.0166 | 2.4057 | 0.0000 | 3.5894 | 0.0000 | 2.4169 | 0.0000 | 1.8261    | 0.0000 | 2.8321 | 0.0000 | 3.9764 | 0.0428 | 1.4497 | 0 |
| 977 | 306.9 | 1.2690 | 0.2788 | 6.9736 | 3.6298 | 0.0165 | 2.4055 | 0.0000 | 3.5891 | 0.0000 | 2.4168 | 0.0000 | 1.8260    | 0.0000 | 2.8319 | 0.0000 | 3.9758 | 0.0427 | 1.4497 | 0 |
| 978 | 306.5 | 1.2677 | 0.2789 | 6.9814 | 3.6294 | 0.0165 | 2.4053 | 0.0000 | 3.5889 | 0.0000 | 2.4167 | 0.0000 | 1.8258    | 0.0000 | 2.8318 | 0.0000 | 3.9752 | 0.0427 | 1.4496 | 0 |
| 979 | 306.2 | 1.2664 | 0.2791 | 6.9892 | 3.6291 | 0.0165 | 2.4050 | 0.0000 | 3.5887 | 0.0000 | 2.4166 | 0.0000 | 1.8257    | 0.0000 | 2.8316 | 0.0000 | 3.9746 | 0.0427 | 1.4496 | 0 |
| 980 | 305.9 | 1.2651 | 0.2792 | 6.9970 | 3.6287 | 0.0165 | 2.4048 | 0.0000 | 3.5884 | 0.0000 | 2.4165 | 0.0000 | 1.8255    | 0.0000 | 2.8314 | 0.0000 | 3.9740 | 0.0427 | 1.4496 | 0 |
| 981 | 305.6 | 1.2639 | 0.2794 | 7.0048 | 3.6284 | 0.0165 | 2.4046 | 0.0000 | 3.5882 | 0.0000 | 2.4164 | 0.0000 | 1.8253    | 0.0000 | 2.8312 | 0.0000 | 3.9733 | 0.0426 | 1.4496 | 0 |
| 982 | 305.3 | 1.2626 | 0.2795 | 7.0126 | 3.6280 | 0.0164 | 2.4044 | 0.0000 | 3.5880 | 0.0000 | 2.4163 | 0.0000 | 1.8252    | 0.0000 | 2.8311 | 0.0000 | 3.9727 | 0.0426 | 1.4496 | 0 |
| 983 | 305   | 1.2613 | 0.2797 | 7.0204 | 3.6277 | 0.0164 | 2.4041 | 0.0000 | 3.5878 | 0.0000 | 2.4162 | 0.0000 | 1.8250    | 0.0000 | 2.8309 | 0.0000 | 3.9721 | 0.0426 | 1.4496 | 0 |
| 984 | 304.7 | 1.2600 | 0.2799 | 7.0282 | 3.6274 | 0.0164 | 2.4039 | 0.0000 | 3.5875 | 0.0000 | 2.4161 | 0.0000 | 1.8248    | 0.0000 | 2.8307 | 0.0000 | 3.9715 | 0.0425 | 1.4496 | 0 |
| 985 | 304.4 | 1.2587 | 0.2800 | 7.0360 | 3.6270 | 0.0164 | 2.4037 | 0.0000 | 3.5873 | 0.0000 | 2.4160 | 0.0000 | 1.8247    | 0.0000 | 2.8305 | 0.0000 | 3.9709 | 0.0425 | 1.4496 | 0 |
| 986 | 304   | 1.2574 | 0.2802 | 7.0439 | 3.6267 | 0.0164 | 2.4035 | 0.0000 | 3.5871 | 0.0000 | 2.4159 | 0.0000 | 1.8245    | 0.0000 | 2.8304 | 0.0000 | 3.9703 | 0.0425 | 1.4496 | 0 |
| 987 | 303.7 | 1.2562 | 0.2803 | 7.0517 | 3.6264 | 0.0163 | 2.4033 | 0.0000 | 3.5869 | 0.0000 | 2.4158 | 0.0000 | 1.8244    | 0.0000 | 2.8302 | 0.0000 | 3.9698 | 0.0425 | 1.4496 | 0 |
| 988 | 303.4 | 1.2549 | 0.2805 | 7.0595 | 3.6260 | 0.0163 | 2.4031 | 0.0000 | 3.5867 | 0.0000 | 2.4157 | 0.0000 | 1.8242    | 0.0000 | 2.8300 | 0.0000 | 3.9692 | 0.0424 | 1.4496 | 0 |
| 989 | 303.1 | 1.2536 | 0.2806 | 7.0673 | 3.6257 | 0.0163 | 2.4028 | 0.0000 | 3.5864 | 0.0000 | 2.4156 | 0.0000 | 1.8241    | 0.0000 | 2.8299 | 0.0000 | 3.9686 | 0.0424 | 1.4496 | 0 |
| 990 | 302.8 | 1.2524 | 0.2808 | 7.0751 | 3.6254 | 0.0163 | 2.4026 | 0.0000 | 3.5862 | 0.0000 | 2.4155 | 0.0000 | 1.8239    | 0.0000 | 2.8297 | 0.0000 | 3.9680 | 0.0424 | 1.4496 | 0 |
| 991 | 302.5 | 1.2511 | 0.2810 | 7.0829 | 3.6250 | 0.0163 | 2.4024 | 0.0000 | 3.5860 | 0.0000 | 2.4154 | 0.0000 | 1.8237    | 0.0000 | 2.8295 | 0.0000 | 3.9674 | 0.0424 | 1.4496 | 0 |
| 992 | 302.2 | 1.2498 | 0.2811 | 7.0907 | 3.6247 | 0.0162 | 2.4022 | 0.0000 | 3.5858 | 0.0000 | 2.4153 | 0.0000 | 1.8236    | 0.0000 | 2.8294 | 0.0000 | 3.9668 | 0.0423 | 1.4495 | 0 |
| 993 | 301.9 | 1.2486 | 0.2813 | 7.0985 | 3.6244 | 0.0162 | 2.4020 | 0.0000 | 3.5856 | 0.0000 | 2.4153 | 0.0000 | 1.8234    | 0.0000 | 2.8292 | 0.0000 | 3.9662 | 0.0423 | 1.4495 | 0 |
| 994 | 301.6 | 1.2473 | 0.2814 | 7.1063 | 3.6240 | 0.0162 | 2.4018 | 0.0000 | 3.5854 | 0.0000 | 2.4152 | 0.0000 | 1.8233    | 0.0000 | 2.8290 | 0.0000 | 3.9657 | 0.0423 | 1.4495 | 0 |
| 995 | 301.3 | 1.2461 | 0.2816 | 7.1141 | 3.6237 | 0.0162 | 2.4016 | 0.0000 | 3.5851 | 0.0000 | 2.4151 | 0.0000 | 1.8231    | 0.0000 | 2.8289 | 0.0000 | 3.9651 | 0.0423 | 1.4495 | 0 |
| 996 | 301   | 1.2448 | 0.2817 | 7.1219 | 3.6234 | 0.0162 | 2.4014 | 0.0000 | 3.5849 | 0.0000 | 2.4150 | 0.0000 | 1.8230    | 0.0000 | 2.8287 | 0.0000 | 3.9645 | 0.0423 | 1.4495 | 0 |
| 997 | 300.7 | 1.2436 | 0.2819 | 7.1297 | 3.6231 | 0.0161 | 2.4011 | 0.0000 | 3.5847 | 0.0000 | 2.4149 | 0.0000 | 1.8228    | 0.0000 | 2.8285 | 0.0000 | 3.9640 | 0.0422 | 1.4495 | 0 |
| 998 | 300.4 | 1.2423 | 0.2821 | 7.1375 | 3.6227 | 0.0161 | 2.4009 | 0.0000 | 3.5845 | 0.0000 | 2.4148 | 0.0000 | 1.8227    | 0.0000 | 2.8284 | 0.0000 | 3.9634 | 0.0422 | 1.4495 | 0 |
| 999 | 300.1 | 1.2411 | 0.2822 | 7.1453 | 3.6224 | 0.0161 | 2.4007 | 0.0000 | 3.5843 | 0.0000 | 2.4147 | 0.0000 | 1.8225    | 0.0000 | 2.8282 | 0.0000 | 3.9628 | 0.0422 | 1.4495 | 0 |

| nm   | THz   | eV     | Ag     |        | cSi    |        | Fe2O3  |        | GaAs   |        | TiO2   |        | P3HT:PCBM |        | CdTe   |        | aSi    |        | SiO2   |   |
|------|-------|--------|--------|--------|--------|--------|--------|--------|--------|--------|--------|--------|-----------|--------|--------|--------|--------|--------|--------|---|
|      |       |        | n      | k      | n      | k      | n      | k      | n      | k      | n      | k      | n         | k      | n      | k      | n      | k      | n      | k |
| 1000 | 299.8 | 1.2398 | 0.2824 | 7.1531 | 3.6221 | 0.0161 | 2.4005 | 0.0000 | 3.5841 | 0.0000 | 2.4146 | 0.0000 | 1.8224    | 0.0000 | 2.8281 | 0.0000 | 3.9623 | 0.0422 | 1.4495 | 0 |
| 1001 | 299.5 | 1.2386 | 0.2825 | 7.1609 | 3.6218 | 0.0161 | 2.4003 | 0.0000 | 3.5839 | 0.0000 | 2.4145 | 0.0000 | 1.8222    | 0.0000 | 2.8279 | 0.0000 | 3.9617 | 0.0421 | 1.4495 | 0 |
| 1002 | 299.2 | 1.2374 | 0.2827 | 7.1687 | 3.6215 | 0.0161 | 2.4001 | 0.0000 | 3.5837 | 0.0000 | 2.4144 | 0.0000 | 1.8221    | 0.0000 | 2.8277 | 0.0000 | 3.9612 | 0.0421 | 1.4495 | 0 |
| 1003 | 298.9 | 1.2361 | 0.2829 | 7.1765 | 3.6212 | 0.0160 | 2.3999 | 0.0000 | 3.5835 | 0.0000 | 2.4143 | 0.0000 | 1.8219    | 0.0000 | 2.8276 | 0.0000 | 3.9606 | 0.0421 | 1.4495 | 0 |
| 1004 | 298.6 | 1.2349 | 0.2830 | 7.1844 | 3.6208 | 0.0160 | 2.3997 | 0.0000 | 3.5833 | 0.0000 | 2.4142 | 0.0000 | 1.8218    | 0.0000 | 2.8274 | 0.0000 | 3.9600 | 0.0421 | 1.4495 | 0 |
| 1005 | 298.3 | 1.2337 | 0.2832 | 7.1922 | 3.6205 | 0.0160 | 2.3995 | 0.0000 | 3.5831 | 0.0000 | 2.4141 | 0.0000 | 1.8216    | 0.0000 | 2.8273 | 0.0000 | 3.9595 | 0.0421 | 1.4495 | 0 |
| 1006 | 298   | 1.2324 | 0.2833 | 7.2000 | 3.6202 | 0.0160 | 2.3993 | 0.0000 | 3.5829 | 0.0000 | 2.4140 | 0.0000 | 1.8215    | 0.0000 | 2.8271 | 0.0000 | 3.9590 | 0.0420 | 1.4495 | 0 |
| 1007 | 297.7 | 1.2312 | 0.2835 | 7.2078 | 3.6199 | 0.0160 | 2.3991 | 0.0000 | 3.5827 | 0.0000 | 2.4139 | 0.0000 | 1.8214    | 0.0000 | 2.8270 | 0.0000 | 3.9584 | 0.0420 | 1.4494 | 0 |
| 1008 | 297.4 | 1.2300 | 0.2837 | 7.2156 | 3.6196 | 0.0159 | 2.3989 | 0.0000 | 3.5825 | 0.0000 | 2.4139 | 0.0000 | 1.8212    | 0.0000 | 2.8268 | 0.0000 | 3.9579 | 0.0420 | 1.4494 | 0 |
| 1009 | 297.1 | 1.2288 | 0.2838 | 7.2234 | 3.6193 | 0.0159 | 2.3987 | 0.0000 | 3.5823 | 0.0000 | 2.4138 | 0.0000 | 1.8211    | 0.0000 | 2.8266 | 0.0000 | 3.9573 | 0.0420 | 1.4494 | 0 |
| 1010 | 296.8 | 1.2276 | 0.2840 | 7.2312 | 3.6190 | 0.0159 | 2.3985 | 0.0000 | 3.5821 | 0.0000 | 2.4137 | 0.0000 | 1.8209    | 0.0000 | 2.8265 | 0.0000 | 3.9568 | 0.0420 | 1.4494 | 0 |
| 1011 | 296.5 | 1.2264 | 0.2841 | 7.2390 | 3.6187 | 0.0159 | 2.3983 | 0.0000 | 3.5819 | 0.0000 | 2.4136 | 0.0000 | 1.8208    | 0.0000 | 2.8263 | 0.0000 | 3.9563 | 0.0420 | 1.4494 | 0 |
| 1012 | 296.2 | 1.2251 | 0.2843 | 7.2468 | 3.6183 | 0.0159 | 2.3981 | 0.0000 | 3.5817 | 0.0000 | 2.4135 | 0.0000 | 1.8206    | 0.0000 | 2.8262 | 0.0000 | 3.9557 | 0.0419 | 1.4494 | 0 |
| 1013 | 295.9 | 1.2239 | 0.2844 | 7.2546 | 3.6180 | 0.0158 | 2.3979 | 0.0000 | 3.5815 | 0.0000 | 2.4134 | 0.0000 | 1.8205    | 0.0000 | 2.8260 | 0.0000 | 3.9552 | 0.0419 | 1.4494 | 0 |
| 1014 | 295.7 | 1.2227 | 0.2846 | 7.2624 | 3.6177 | 0.0158 | 2.3977 | 0.0000 | 3.5813 | 0.0000 | 2.4133 | 0.0000 | 1.8204    | 0.0000 | 2.8259 | 0.0000 | 3.9547 | 0.0419 | 1.4494 | 0 |
| 1015 | 295.4 | 1.2215 | 0.2848 | 7.2702 | 3.6174 | 0.0158 | 2.3975 | 0.0000 | 3.5811 | 0.0000 | 2.4132 | 0.0000 | 1.8202    | 0.0000 | 2.8257 | 0.0000 | 3.9541 | 0.0419 | 1.4494 | 0 |
| 1016 | 295.1 | 1.2203 | 0.2849 | 7.2780 | 3.6171 | 0.0158 | 2.3973 | 0.0000 | 3.5809 | 0.0000 | 2.4131 | 0.0000 | 1.8201    | 0.0000 | 2.8256 | 0.0000 | 3.9536 | 0.0419 | 1.4494 | 0 |
| 1017 | 294.8 | 1.2191 | 0.2851 | 7.2858 | 3.6168 | 0.0158 | 2.3972 | 0.0000 | 3.5807 | 0.0000 | 2.4131 | 0.0000 | 1.8199    | 0.0000 | 2.8255 | 0.0000 | 3.9531 | 0.0418 | 1.4494 | 0 |
| 1018 | 294.5 | 1.2179 | 0.2852 | 7.2936 | 3.6165 | 0.0158 | 2.3970 | 0.0000 | 3.5805 | 0.0000 | 2.4130 | 0.0000 | 1.8198    | 0.0000 | 2.8253 | 0.0000 | 3.9526 | 0.0418 | 1.4494 | 0 |
| 1019 | 294.2 | 1.2167 | 0.2854 | 7.3014 | 3.6162 | 0.0157 | 2.3968 | 0.0000 | 3.5803 | 0.0000 | 2.4129 | 0.0000 | 1.8197    | 0.0000 | 2.8252 | 0.0000 | 3.9520 | 0.0418 | 1.4494 | 0 |
| 1020 | 293.9 | 1.2155 | 0.2856 | 7.3092 | 3.6159 | 0.0157 | 2.3966 | 0.0000 | 3.5801 | 0.0000 | 2.4128 | 0.0000 | 1.8195    | 0.0000 | 2.8250 | 0.0000 | 3.9515 | 0.0418 | 1.4494 | 0 |
| 1021 | 293.6 | 1.2143 | 0.2857 | 7.3170 | 3.6156 | 0.0157 | 2.3964 | 0.0000 | 3.5799 | 0.0000 | 2.4127 | 0.0000 | 1.8194    | 0.0000 | 2.8249 | 0.0000 | 3.9510 | 0.0418 | 1.4494 | 0 |
| 1022 | 293.3 | 1.2132 | 0.2859 | 7.3248 | 3.6153 | 0.0157 | 2.3962 | 0.0000 | 3.5797 | 0.0000 | 2.4126 | 0.0000 | 1.8193    | 0.0000 | 2.8247 | 0.0000 | 3.9505 | 0.0418 | 1.4494 | 0 |
| 1023 | 293.1 | 1.2120 | 0.2860 | 7.3326 | 3.6150 | 0.0157 | 2.3960 | 0.0000 | 3.5795 | 0.0000 | 2.4125 | 0.0000 | 1.8191    | 0.0000 | 2.8246 | 0.0000 | 3.9500 | 0.0418 | 1.4493 | 0 |
| 1024 | 292.8 | 1.2108 | 0.2862 | 7.3404 | 3.6147 | 0.0156 | 2.3958 | 0.0000 | 3.5793 | 0.0000 | 2.4124 | 0.0000 | 1.8190    | 0.0000 | 2.8244 | 0.0000 | 3.9495 | 0.0417 | 1.4493 | 0 |
| 1025 | 292.5 | 1.2096 | 0.2864 | 7.3483 | 3.6144 | 0.0156 | 2.3956 | 0.0000 | 3.5792 | 0.0000 | 2.4124 | 0.0000 | 1.8189    | 0.0000 | 2.8243 | 0.0000 | 3.9490 | 0.0417 | 1.4493 | 0 |
| 1026 | 292.2 | 1.2084 | 0.2865 | 7.3561 | 3.6141 | 0.0156 | 2.3955 | 0.0000 | 3.5790 | 0.0000 | 2.4123 | 0.0000 | 1.8187    | 0.0000 | 2.8242 | 0.0000 | 3.9485 | 0.0417 | 1.4493 | 0 |
| 1027 | 291.9 | 1.2072 | 0.2867 | 7.3639 | 3.6139 | 0.0156 | 2.3953 | 0.0000 | 3.5788 | 0.0000 | 2.4122 | 0.0000 | 1.8186    | 0.0000 | 2.8240 | 0.0000 | 3.9480 | 0.0417 | 1.4493 | 0 |
| 1028 | 291.6 | 1.2061 | 0.2868 | 7.3717 | 3.6136 | 0.0156 | 2.3951 | 0.0000 | 3.5786 | 0.0000 | 2.4121 | 0.0000 | 1.8185    | 0.0000 | 2.8239 | 0.0000 | 3.9475 | 0.0417 | 1.4493 | 0 |
| 1029 | 291.3 | 1.2049 | 0.2870 | 7.3795 | 3.6133 | 0.0156 | 2.3949 | 0.0000 | 3.5784 | 0.0000 | 2.4120 | 0.0000 | 1.8183    | 0.0000 | 2.8237 | 0.0000 | 3.9470 | 0.0417 | 1.4493 | 0 |
| 1030 | 291.1 | 1.2037 | 0.2872 | 7.3873 | 3.6130 | 0.0155 | 2.3947 | 0.0000 | 3.5782 | 0.0000 | 2.4119 | 0.0000 | 1.8182    | 0.0000 | 2.8236 | 0.0000 | 3.9465 | 0.0417 | 1.4493 | 0 |
| 1031 | 290.8 | 1.2026 | 0.2873 | 7.3951 | 3.6127 | 0.0155 | 2.3946 | 0.0000 | 3.5780 | 0.0000 | 2.4118 | 0.0000 | 1.8181    | 0.0000 | 2.8235 | 0.0000 | 3.9460 | 0.0416 | 1.4493 | 0 |

| nm   | THz   | eV     | Ag     |        | cSi    |        | Fe2O3  |        | GaAs   |        | TiO2   |        | P3HT:PCBM |        | CdTe   |        | aSi    |        | SiO2   |   |
|------|-------|--------|--------|--------|--------|--------|--------|--------|--------|--------|--------|--------|-----------|--------|--------|--------|--------|--------|--------|---|
|      |       |        | n      | k      | n      | k      | n      | k      | n      | k      | n      | k      | n         | k      | n      | k      | n      | k      | n      | k |
| 1032 | 290.5 | 1.2014 | 0.2875 | 7.4029 | 3.6124 | 0.0155 | 2.3944 | 0.0000 | 3.5779 | 0.0000 | 2.4118 | 0.0000 | 1.8179    | 0.0000 | 2.8233 | 0.0000 | 3.9455 | 0.0416 | 1.4493 | 0 |
| 1033 | 290.2 | 1.2002 | 0.2877 | 7.4107 | 3.6121 | 0.0155 | 2.3942 | 0.0000 | 3.5777 | 0.0000 | 2.4117 | 0.0000 | 1.8178    | 0.0000 | 2.8232 | 0.0000 | 3.9450 | 0.0416 | 1.4493 | 0 |
| 1034 | 289.9 | 1.1991 | 0.2878 | 7.4185 | 3.6118 | 0.0155 | 2.3940 | 0.0000 | 3.5775 | 0.0000 | 2.4116 | 0.0000 | 1.8177    | 0.0000 | 2.8231 | 0.0000 | 3.9445 | 0.0416 | 1.4493 | 0 |
| 1035 | 289.7 | 1.1979 | 0.2880 | 7.4263 | 3.6116 | 0.0155 | 2.3938 | 0.0000 | 3.5773 | 0.0000 | 2.4115 | 0.0000 | 1.8176    | 0.0000 | 2.8229 | 0.0000 | 3.9440 | 0.0416 | 1.4493 | 0 |
| 1036 | 289.4 | 1.1968 | 0.2881 | 7.4341 | 3.6113 | 0.0154 | 2.3937 | 0.0000 | 3.5771 | 0.0000 | 2.4114 | 0.0000 | 1.8174    | 0.0000 | 2.8228 | 0.0000 | 3.9435 | 0.0416 | 1.4493 | 0 |
| 1037 | 289.1 | 1.1956 | 0.2883 | 7.4419 | 3.6110 | 0.0154 | 2.3935 | 0.0000 | 3.5770 | 0.0000 | 2.4113 | 0.0000 | 1.8173    | 0.0000 | 2.8227 | 0.0000 | 3.9431 | 0.0416 | 1.4493 | 0 |
| 1038 | 288.8 | 1.1945 | 0.2885 | 7.4497 | 3.6107 | 0.0154 | 2.3933 | 0.0000 | 3.5768 | 0.0000 | 2.4113 | 0.0000 | 1.8172    | 0.0000 | 2.8225 | 0.0000 | 3.9426 | 0.0415 | 1.4493 | 0 |
| 1039 | 288.5 | 1.1933 | 0.2886 | 7.4575 | 3.6104 | 0.0154 | 2.3931 | 0.0000 | 3.5766 | 0.0000 | 2.4112 | 0.0000 | 1.8170    | 0.0000 | 2.8224 | 0.0000 | 3.9421 | 0.0415 | 1.4492 | 0 |
| 1040 | 288.3 | 1.1922 | 0.2888 | 7.4653 | 3.6101 | 0.0154 | 2.3930 | 0.0000 | 3.5764 | 0.0000 | 2.4111 | 0.0000 | 1.8169    | 0.0000 | 2.8223 | 0.0000 | 3.9416 | 0.0415 | 1.4492 | 0 |
| 1041 | 288   | 1.1910 | 0.2889 | 7.4731 | 3.6099 | 0.0154 | 2.3928 | 0.0000 | 3.5763 | 0.0000 | 2.4110 | 0.0000 | 1.8168    | 0.0000 | 2.8221 | 0.0000 | 3.9412 | 0.0415 | 1.4492 | 0 |
| 1042 | 287.7 | 1.1899 | 0.2891 | 7.4809 | 3.6096 | 0.0153 | 2.3926 | 0.0000 | 3.5761 | 0.0000 | 2.4109 | 0.0000 | 1.8167    | 0.0000 | 2.8220 | 0.0000 | 3.9407 | 0.0415 | 1.4492 | 0 |
| 1043 | 287.4 | 1.1887 | 0.2893 | 7.4887 | 3.6093 | 0.0153 | 2.3924 | 0.0000 | 3.5759 | 0.0000 | 2.4109 | 0.0000 | 1.8165    | 0.0000 | 2.8219 | 0.0000 | 3.9402 | 0.0415 | 1.4492 | 0 |
| 1044 | 287.2 | 1.1876 | 0.2894 | 7.4966 | 3.6090 | 0.0153 | 2.3923 | 0.0000 | 3.5757 | 0.0000 | 2.4108 | 0.0000 | 1.8164    | 0.0000 | 2.8218 | 0.0000 | 3.9397 | 0.0415 | 1.4492 | 0 |
| 1045 | 286.9 | 1.1865 | 0.2896 | 7.5044 | 3.6088 | 0.0153 | 2.3921 | 0.0000 | 3.5756 | 0.0000 | 2.4107 | 0.0000 | 1.8163    | 0.0000 | 2.8216 | 0.0000 | 3.9393 | 0.0415 | 1.4492 | 0 |
| 1046 | 286.6 | 1.1853 | 0.2898 | 7.5122 | 3.6085 | 0.0153 | 2.3919 | 0.0000 | 3.5754 | 0.0000 | 2.4106 | 0.0000 | 1.8162    | 0.0000 | 2.8215 | 0.0000 | 3.9388 | 0.0415 | 1.4492 | 0 |
| 1047 | 286.3 | 1.1842 | 0.2899 | 7.5200 | 3.6082 | 0.0153 | 2.3918 | 0.0000 | 3.5752 | 0.0000 | 2.4105 | 0.0000 | 1.8161    | 0.0000 | 2.8214 | 0.0000 | 3.9384 | 0.0414 | 1.4492 | 0 |
| 1048 | 286.1 | 1.1831 | 0.2901 | 7.5278 | 3.6079 | 0.0152 | 2.3916 | 0.0000 | 3.5750 | 0.0000 | 2.4105 | 0.0000 | 1.8159    | 0.0000 | 2.8212 | 0.0000 | 3.9379 | 0.0414 | 1.4492 | 0 |
| 1049 | 285.8 | 1.1819 | 0.2902 | 7.5356 | 3.6077 | 0.0152 | 2.3914 | 0.0000 | 3.5749 | 0.0000 | 2.4104 | 0.0000 | 1.8158    | 0.0000 | 2.8211 | 0.0000 | 3.9374 | 0.0414 | 1.4492 | 0 |
| 1050 | 285.5 | 1.1808 | 0.2904 | 7.5434 | 3.6074 | 0.0152 | 2.3912 | 0.0000 | 3.5747 | 0.0000 | 2.4103 | 0.0000 | 1.8157    | 0.0000 | 2.8210 | 0.0000 | 3.9370 | 0.0414 | 1.4492 | 0 |
| 1051 | 285.2 | 1.1797 | 0.2906 | 7.5512 | 3.6071 | 0.0152 | 2.3911 | 0.0000 | 3.5745 | 0.0000 | 2.4102 | 0.0000 | 1.8156    | 0.0000 | 2.8209 | 0.0000 | 3.9365 | 0.0414 | 1.4492 | 0 |
| 1052 | 285   | 1.1786 | 0.2907 | 7.5590 | 3.6068 | 0.0152 | 2.3909 | 0.0000 | 3.5744 | 0.0000 | 2.4101 | 0.0000 | 1.8154    | 0.0000 | 2.8208 | 0.0000 | 3.9361 | 0.0414 | 1.4492 | 0 |
| 1053 | 284.7 | 1.1774 | 0.2909 | 7.5668 | 3.6066 | 0.0152 | 2.3907 | 0.0000 | 3.5742 | 0.0000 | 2.4101 | 0.0000 | 1.8153    | 0.0000 | 2.8206 | 0.0000 | 3.9356 | 0.0414 | 1.4492 | 0 |
| 1054 | 284.4 | 1.1763 | 0.2910 | 7.5746 | 3.6063 | 0.0151 | 2.3906 | 0.0000 | 3.5740 | 0.0000 | 2.4100 | 0.0000 | 1.8152    | 0.0000 | 2.8205 | 0.0000 | 3.9352 | 0.0414 | 1.4492 | 0 |
| 1055 | 284.2 | 1.1752 | 0.2912 | 7.5824 | 3.6060 | 0.0151 | 2.3904 | 0.0000 | 3.5739 | 0.0000 | 2.4099 | 0.0000 | 1.8151    | 0.0000 | 2.8204 | 0.0000 | 3.9347 | 0.0414 | 1.4492 | 0 |
| 1056 | 283.9 | 1.1741 | 0.2914 | 7.5902 | 3.6058 | 0.0151 | 2.3903 | 0.0000 | 3.5737 | 0.0000 | 2.4098 | 0.0000 | 1.8150    | 0.0000 | 2.8203 | 0.0000 | 3.9343 | 0.0414 | 1.4492 | 0 |
| 1057 | 283.6 | 1.1730 | 0.2915 | 7.5980 | 3.6055 | 0.0151 | 2.3901 | 0.0000 | 3.5735 | 0.0000 | 2.4097 | 0.0000 | 1.8149    | 0.0000 | 2.8201 | 0.0000 | 3.9338 | 0.0414 | 1.4491 | 0 |
| 1058 | 283.4 | 1.1719 | 0.2917 | 7.6058 | 3.6052 | 0.0151 | 2.3899 | 0.0000 | 3.5734 | 0.0000 | 2.4097 | 0.0000 | 1.8147    | 0.0000 | 2.8200 | 0.0000 | 3.9334 | 0.0413 | 1.4491 | 0 |
| 1059 | 283.1 | 1.1708 | 0.2919 | 7.6136 | 3.6050 | 0.0151 | 2.3898 | 0.0000 | 3.5732 | 0.0000 | 2.4096 | 0.0000 | 1.8146    | 0.0000 | 2.8199 | 0.0000 | 3.9329 | 0.0413 | 1.4491 | 0 |
| 1060 | 282.8 | 1.1697 | 0.2920 | 7.6215 | 3.6047 | 0.0150 | 2.3896 | 0.0000 | 3.5731 | 0.0000 | 2.4095 | 0.0000 | 1.8145    | 0.0000 | 2.8198 | 0.0000 | 3.9325 | 0.0413 | 1.4491 | 0 |
| 1061 | 282.6 | 1.1686 | 0.2922 | 7.6293 | 3.6045 | 0.0150 | 2.3894 | 0.0000 | 3.5729 | 0.0000 | 2.4094 | 0.0000 | 1.8144    | 0.0000 | 2.8197 | 0.0000 | 3.9321 | 0.0413 | 1.4491 | 0 |
| 1062 | 282.3 | 1.1675 | 0.2924 | 7.6371 | 3.6042 | 0.0150 | 2.3893 | 0.0000 | 3.5727 | 0.0000 | 2.4094 | 0.0000 | 1.8143    | 0.0000 | 2.8196 | 0.0000 | 3.9316 | 0.0413 | 1.4491 | 0 |
| 1063 | 282   | 1.1664 | 0.2925 | 7.6449 | 3.6039 | 0.0150 | 2.3891 | 0.0000 | 3.5726 | 0.0000 | 2.4093 | 0.0000 | 1.8142    | 0.0000 | 2.8194 | 0.0000 | 3.9312 | 0.0413 | 1.4491 | 0 |

| nm   | THz   | eV     | Ag     |        | cSi    |        | Fe2O3  |        | GaAs   |        | TiO2   |        | P3HT:PCBM |        | CdTe   |        | aSi    |        | SiO2   |   |
|------|-------|--------|--------|--------|--------|--------|--------|--------|--------|--------|--------|--------|-----------|--------|--------|--------|--------|--------|--------|---|
|      |       |        | n      | k      | n      | k      | n      | k      | n      | k      | n      | k      | n         | k      | n      | k      | n      | k      | n      | k |
| 1064 | 281.8 | 1.1653 | 0.2927 | 7.6527 | 3.6037 | 0.0150 | 2.3890 | 0.0000 | 3.5724 | 0.0000 | 2.4092 | 0.0000 | 1.8140    | 0.0000 | 2.8193 | 0.0000 | 3.9308 | 0.0413 | 1.4491 | 0 |
| 1065 | 281.5 | 1.1642 | 0.2928 | 7.6605 | 3.6034 | 0.0150 | 2.3888 | 0.0000 | 3.5723 | 0.0000 | 2.4091 | 0.0000 | 1.8139    | 0.0000 | 2.8192 | 0.0000 | 3.9303 | 0.0413 | 1.4491 | 0 |
| 1066 | 281.2 | 1.1631 | 0.2930 | 7.6683 | 3.6032 | 0.0149 | 2.3886 | 0.0000 | 3.5721 | 0.0000 | 2.4091 | 0.0000 | 1.8138    | 0.0000 | 2.8191 | 0.0000 | 3.9299 | 0.0413 | 1.4491 | 0 |
| 1067 | 281   | 1.1620 | 0.2932 | 7.6761 | 3.6029 | 0.0149 | 2.3885 | 0.0000 | 3.5719 | 0.0000 | 2.4090 | 0.0000 | 1.8137    | 0.0000 | 2.8190 | 0.0000 | 3.9295 | 0.0413 | 1.4491 | 0 |
| 1068 | 280.7 | 1.1609 | 0.2933 | 7.6839 | 3.6026 | 0.0149 | 2.3883 | 0.0000 | 3.5718 | 0.0000 | 2.4089 | 0.0000 | 1.8136    | 0.0000 | 2.8189 | 0.0000 | 3.9290 | 0.0413 | 1.4491 | 0 |
| 1069 | 280.4 | 1.1598 | 0.2935 | 7.6917 | 3.6024 | 0.0149 | 2.3882 | 0.0000 | 3.5716 | 0.0000 | 2.4088 | 0.0000 | 1.8135    | 0.0000 | 2.8188 | 0.0000 | 3.9286 | 0.0413 | 1.4491 | 0 |
| 1070 | 280.2 | 1.1587 | 0.2937 | 7.6995 | 3.6021 | 0.0149 | 2.3880 | 0.0000 | 3.5715 | 0.0000 | 2.4088 | 0.0000 | 1.8134    | 0.0000 | 2.8186 | 0.0000 | 3.9282 | 0.0412 | 1.4491 | 0 |
| 1071 | 279.9 | 1.1576 | 0.2938 | 7.7073 | 3.6019 | 0.0149 | 2.3879 | 0.0000 | 3.5713 | 0.0000 | 2.4087 | 0.0000 | 1.8133    | 0.0000 | 2.8185 | 0.0000 | 3.9278 | 0.0412 | 1.4491 | 0 |
| 1072 | 279.7 | 1.1566 | 0.2940 | 7.7151 | 3.6016 | 0.0148 | 2.3877 | 0.0000 | 3.5712 | 0.0000 | 2.4086 | 0.0000 | 1.8131    | 0.0000 | 2.8184 | 0.0000 | 3.9274 | 0.0412 | 1.4491 | 0 |
| 1073 | 279.4 | 1.1555 | 0.2942 | 7.7229 | 3.6014 | 0.0148 | 2.3876 | 0.0000 | 3.5710 | 0.0000 | 2.4085 | 0.0000 | 1.8130    | 0.0000 | 2.8183 | 0.0000 | 3.9269 | 0.0412 | 1.4491 | 0 |
| 1074 | 279.1 | 1.1544 | 0.2943 | 7.7308 | 3.6011 | 0.0148 | 2.3874 | 0.0000 | 3.5709 | 0.0000 | 2.4085 | 0.0000 | 1.8129    | 0.0000 | 2.8182 | 0.0000 | 3.9265 | 0.0412 | 1.4491 | 0 |
| 1075 | 278.9 | 1.1533 | 0.2945 | 7.7386 | 3.6009 | 0.0148 | 2.3873 | 0.0000 | 3.5707 | 0.0000 | 2.4084 | 0.0000 | 1.8128    | 0.0000 | 2.8181 | 0.0000 | 3.9261 | 0.0412 | 1.4490 | 0 |
| 1076 | 278.6 | 1.1523 | 0.2947 | 7.7464 | 3.6006 | 0.0148 | 2.3871 | 0.0000 | 3.5705 | 0.0000 | 2.4083 | 0.0000 | 1.8127    | 0.0000 | 2.8180 | 0.0000 | 3.9257 | 0.0412 | 1.4490 | 0 |
| 1077 | 278.4 | 1.1512 | 0.2948 | 7.7542 | 3.6004 | 0.0148 | 2.3870 | 0.0000 | 3.5704 | 0.0000 | 2.4082 | 0.0000 | 1.8126    | 0.0000 | 2.8179 | 0.0000 | 3.9253 | 0.0412 | 1.4490 | 0 |
| 1078 | 278.1 | 1.1501 | 0.2950 | 7.7620 | 3.6001 | 0.0147 | 2.3868 | 0.0000 | 3.5702 | 0.0000 | 2.4082 | 0.0000 | 1.8125    | 0.0000 | 2.8178 | 0.0000 | 3.9249 | 0.0412 | 1.4490 | 0 |
| 1079 | 277.8 | 1.1491 | 0.2951 | 7.7698 | 3.5999 | 0.0147 | 2.3867 | 0.0000 | 3.5701 | 0.0000 | 2.4081 | 0.0000 | 1.8124    | 0.0000 | 2.8177 | 0.0000 | 3.9245 | 0.0412 | 1.4490 | 0 |
| 1080 | 277.6 | 1.1480 | 0.2953 | 7.7776 | 3.5996 | 0.0147 | 2.3865 | 0.0000 | 3.5699 | 0.0000 | 2.4080 | 0.0000 | 1.8123    | 0.0000 | 2.8176 | 0.0000 | 3.9241 | 0.0412 | 1.4490 | 0 |
| 1081 | 277.3 | 1.1469 | 0.2955 | 7.7854 | 3.5994 | 0.0147 | 2.3864 | 0.0000 | 3.5698 | 0.0000 | 2.4079 | 0.0000 | 1.8122    | 0.0000 | 2.8175 | 0.0000 | 3.9237 | 0.0412 | 1.4490 | 0 |
| 1082 | 277.1 | 1.1459 | 0.2956 | 7.7932 | 3.5991 | 0.0147 | 2.3862 | 0.0000 | 3.5696 | 0.0000 | 2.4079 | 0.0000 | 1.8121    | 0.0000 | 2.8173 | 0.0000 | 3.9233 | 0.0412 | 1.4490 | 0 |
| 1083 | 276.8 | 1.1448 | 0.2958 | 7.8010 | 3.5989 | 0.0147 | 2.3861 | 0.0000 | 3.5695 | 0.0000 | 2.4078 | 0.0000 | 1.8120    | 0.0000 | 2.8172 | 0.0000 | 3.9229 | 0.0412 | 1.4490 | 0 |
| 1084 | 276.6 | 1.1438 | 0.2960 | 7.8088 | 3.5986 | 0.0147 | 2.3859 | 0.0000 | 3.5694 | 0.0000 | 2.4077 | 0.0000 | 1.8119    | 0.0000 | 2.8171 | 0.0000 | 3.9225 | 0.0411 | 1.4490 | 0 |
| 1085 | 276.3 | 1.1427 | 0.2961 | 7.8167 | 3.5984 | 0.0146 | 2.3858 | 0.0000 | 3.5692 | 0.0000 | 2.4077 | 0.0000 | 1.8117    | 0.0000 | 2.8170 | 0.0000 | 3.9221 | 0.0411 | 1.4490 | 0 |
| 1086 | 276.1 | 1.1417 | 0.2963 | 7.8245 | 3.5982 | 0.0146 | 2.3856 | 0.0000 | 3.5691 | 0.0000 | 2.4076 | 0.0000 | 1.8116    | 0.0000 | 2.8169 | 0.0000 | 3.9217 | 0.0411 | 1.4490 | 0 |
| 1087 | 275.8 | 1.1406 | 0.2965 | 7.8323 | 3.5979 | 0.0146 | 2.3855 | 0.0000 | 3.5689 | 0.0000 | 2.4075 | 0.0000 | 1.8115    | 0.0000 | 2.8168 | 0.0000 | 3.9213 | 0.0411 | 1.4490 | 0 |
| 1088 | 275.5 | 1.1396 | 0.2966 | 7.8401 | 3.5977 | 0.0146 | 2.3853 | 0.0000 | 3.5688 | 0.0000 | 2.4074 | 0.0000 | 1.8114    | 0.0000 | 2.8167 | 0.0000 | 3.9209 | 0.0411 | 1.4490 | 0 |
| 1089 | 275.3 | 1.1385 | 0.2968 | 7.8479 | 3.5974 | 0.0146 | 2.3852 | 0.0000 | 3.5686 | 0.0000 | 2.4074 | 0.0000 | 1.8113    | 0.0000 | 2.8166 | 0.0000 | 3.9205 | 0.0411 | 1.4490 | 0 |
| 1090 | 275   | 1.1375 | 0.2970 | 7.8557 | 3.5972 | 0.0146 | 2.3850 | 0.0000 | 3.5685 | 0.0000 | 2.4073 | 0.0000 | 1.8112    | 0.0000 | 2.8165 | 0.0000 | 3.9201 | 0.0411 | 1.4490 | 0 |
| 1091 | 274.8 | 1.1364 | 0.2971 | 7.8635 | 3.5970 | 0.0145 | 2.3849 | 0.0000 | 3.5683 | 0.0000 | 2.4072 | 0.0000 | 1.8111    | 0.0000 | 2.8164 | 0.0000 | 3.9197 | 0.0411 | 1.4490 | 0 |
| 1092 | 274.5 | 1.1354 | 0.2973 | 7.8713 | 3.5967 | 0.0145 | 2.3848 | 0.0000 | 3.5682 | 0.0000 | 2.4072 | 0.0000 | 1.8110    | 0.0000 | 2.8163 | 0.0000 | 3.9193 | 0.0411 | 1.4490 | 0 |
| 1093 | 274.3 | 1.1343 | 0.2975 | 7.8791 | 3.5965 | 0.0145 | 2.3846 | 0.0000 | 3.5681 | 0.0000 | 2.4071 | 0.0000 | 1.8109    | 0.0000 | 2.8162 | 0.0000 | 3.9189 | 0.0411 | 1.4490 | 0 |
| 1094 | 274   | 1.1333 | 0.2976 | 7.8870 | 3.5962 | 0.0145 | 2.3845 | 0.0000 | 3.5679 | 0.0000 | 2.4070 | 0.0000 | 1.8108    | 0.0000 | 2.8161 | 0.0000 | 3.9185 | 0.0411 | 1.4489 | 0 |
| 1095 | 273.8 | 1.1323 | 0.2978 | 7.8948 | 3.5960 | 0.0145 | 2.3843 | 0.0000 | 3.5678 | 0.0000 | 2.4070 | 0.0000 | 1.8107    | 0.0000 | 2.8160 | 0.0000 | 3.9181 | 0.0411 | 1.4489 | 0 |

| nm   | THz   | eV     | Ag     |        | cSi    |        | Fe2O3  |        | GaAs   |        | TiO2   |        | P3HT:PCBM |        | CdTe   |        | aSi    |        | SiO2   |   |
|------|-------|--------|--------|--------|--------|--------|--------|--------|--------|--------|--------|--------|-----------|--------|--------|--------|--------|--------|--------|---|
|      |       |        | n      | k      | n      | k      | n      | k      | n      | k      | n      | k      | n         | k      | n      | k      | n      | k      | n      | k |
| 1096 | 273.5 | 1.1312 | 0.2980 | 7.9026 | 3.5958 | 0.0145 | 2.3842 | 0.0000 | 3.5676 | 0.0000 | 2.4069 | 0.0000 | 1.8106    | 0.0000 | 2.8159 | 0.0000 | 3.9178 | 0.0411 | 1.4489 | 0 |
| 1097 | 273.3 | 1.1302 | 0.2981 | 7.9104 | 3.5955 | 0.0145 | 2.3841 | 0.0000 | 3.5675 | 0.0000 | 2.4068 | 0.0000 | 1.8105    | 0.0000 | 2.8158 | 0.0000 | 3.9174 | 0.0411 | 1.4489 | 0 |
| 1098 | 273   | 1.1292 | 0.2983 | 7.9182 | 3.5953 | 0.0144 | 2.3839 | 0.0000 | 3.5673 | 0.0000 | 2.4067 | 0.0000 | 1.8104    | 0.0000 | 2.8157 | 0.0000 | 3.9170 | 0.0411 | 1.4489 | 0 |
| 1099 | 272.8 | 1.1282 | 0.2985 | 7.9260 | 3.5951 | 0.0144 | 2.3838 | 0.0000 | 3.5672 | 0.0000 | 2.4067 | 0.0000 | 1.8103    | 0.0000 | 2.8156 | 0.0000 | 3.9166 | 0.0411 | 1.4489 | 0 |
| 1100 | 272.5 | 1.1271 | 0.2986 | 7.9338 | 3.5948 | 0.0144 | 2.3836 | 0.0000 | 3.5671 | 0.0000 | 2.4066 | 0.0000 | 1.8102    | 0.0000 | 2.8156 | 0.0000 | 3.9162 | 0.0411 | 1.4489 | 0 |
| 1101 | 272.3 | 1.1261 | 0.2988 | 7.9416 | 3.5946 | 0.0144 | 2.3835 | 0.0000 | 3.5669 | 0.0000 | 2.4065 | 0.0000 | 1.8101    | 0.0000 | 2.8155 | 0.0000 | 3.9159 | 0.0411 | 1.4489 | 0 |
| 1102 | 272   | 1.1251 | 0.2990 | 7.9495 | 3.5944 | 0.0144 | 2.3834 | 0.0000 | 3.5668 | 0.0000 | 2.4065 | 0.0000 | 1.8100    | 0.0000 | 2.8154 | 0.0000 | 3.9155 | 0.0411 | 1.4489 | 0 |
| 1103 | 271.8 | 1.1241 | 0.2991 | 7.9573 | 3.5941 | 0.0144 | 2.3832 | 0.0000 | 3.5667 | 0.0000 | 2.4064 | 0.0000 | 1.8099    | 0.0000 | 2.8153 | 0.0000 | 3.9151 | 0.0410 | 1.4489 | 0 |
| 1104 | 271.6 | 1.1230 | 0.2993 | 7.9651 | 3.5939 | 0.0144 | 2.3831 | 0.0000 | 3.5665 | 0.0000 | 2.4063 | 0.0000 | 1.8098    | 0.0000 | 2.8152 | 0.0000 | 3.9148 | 0.0410 | 1.4489 | 0 |
| 1105 | 271.3 | 1.1220 | 0.2995 | 7.9729 | 3.5937 | 0.0143 | 2.3830 | 0.0000 | 3.5664 | 0.0000 | 2.4063 | 0.0000 | 1.8097    | 0.0000 | 2.8151 | 0.0000 | 3.9144 | 0.0410 | 1.4489 | 0 |
| 1106 | 271.1 | 1.1210 | 0.2996 | 7.9807 | 3.5935 | 0.0143 | 2.3828 | 0.0000 | 3.5663 | 0.0000 | 2.4062 | 0.0000 | 1.8096    | 0.0000 | 2.8150 | 0.0000 | 3.9140 | 0.0410 | 1.4489 | 0 |
| 1107 | 270.8 | 1.1200 | 0.2998 | 7.9885 | 3.5932 | 0.0143 | 2.3827 | 0.0000 | 3.5661 | 0.0000 | 2.4061 | 0.0000 | 1.8095    | 0.0000 | 2.8149 | 0.0000 | 3.9136 | 0.0000 | 1.4489 | 0 |
| 1108 | 270.6 | 1.1190 | 0.3000 | 7.9963 | 3.5930 | 0.0000 | 2.3825 | 0.0000 | 3.5660 | 0.0000 | 2.4061 | 0.0000 | 1.8094    | 0.0000 | 2.8148 | 0.0000 | 3.9133 | 0.0000 | 1.4489 | 0 |
| 1109 | 270.3 | 1.1180 | 0.3001 | 8.0041 | 3.5928 | 0.0000 | 2.3824 | 0.0000 | 3.5658 | 0.0000 | 2.4060 | 0.0000 | 1.8093    | 0.0000 | 2.8147 | 0.0000 | 3.9129 | 0.0000 | 1.4489 | 0 |
| 1110 | 270.1 | 1.1170 | 0.3003 | 8.0120 | 3.5926 | 0.0000 | 2.3823 | 0.0000 | 3.5657 | 0.0000 | 2.4059 | 0.0000 | 1.8092    | 0.0000 | 2.8146 | 0.0000 | 3.9126 | 0.0000 | 1.4489 | 0 |
| 1111 | 269.8 | 1.1160 | 0.3005 | 8.0198 | 3.5923 | 0.0000 | 2.3821 | 0.0000 | 3.5656 | 0.0000 | 2.4059 | 0.0000 | 1.8091    | 0.0000 | 2.8145 | 0.0000 | 3.9122 | 0.0000 | 1.4489 | 0 |
| 1112 | 269.6 | 1.1150 | 0.3006 | 8.0276 | 3.5921 | 0.0000 | 2.3820 | 0.0000 | 3.5655 | 0.0000 | 2.4058 | 0.0000 | 1.8091    | 0.0000 | 2.8145 | 0.0000 | 3.9118 | 0.0000 | 1.4489 | 0 |
| 1113 | 269.4 | 1.1140 | 0.3008 | 8.0354 | 3.5919 | 0.0000 | 2.3819 | 0.0000 | 3.5653 | 0.0000 | 2.4057 | 0.0000 | 1.8090    | 0.0000 | 2.8144 | 0.0000 | 3.9115 | 0.0000 | 1.4489 | 0 |
| 1114 | 269.1 | 1.1130 | 0.3010 | 8.0432 | 3.5917 | 0.0000 | 2.3818 | 0.0000 | 3.5652 | 0.0000 | 2.4057 | 0.0000 | 1.8089    | 0.0000 | 2.8143 | 0.0000 | 3.9111 | 0.0000 | 1.4489 | 0 |
| 1115 | 268.9 | 1.1120 | 0.3011 | 8.0510 | 3.5914 | 0.0000 | 2.3816 | 0.0000 | 3.5651 | 0.0000 | 2.4056 | 0.0000 | 1.8088    | 0.0000 | 2.8142 | 0.0000 | 3.9108 | 0.0000 | 1.4488 | 0 |
| 1116 | 268.6 | 1.1110 | 0.3013 | 8.0589 | 3.5912 | 0.0000 | 2.3815 | 0.0000 | 3.5649 | 0.0000 | 2.4055 | 0.0000 | 1.8087    | 0.0000 | 2.8141 | 0.0000 | 3.9104 | 0.0000 | 1.4488 | 0 |
| 1117 | 268.4 | 1.1100 | 0.3015 | 8.0667 | 3.5910 | 0.0000 | 2.3814 | 0.0000 | 3.5648 | 0.0000 | 2.4055 | 0.0000 | 1.8086    | 0.0000 | 2.8140 | 0.0000 | 3.9100 | 0.0000 | 1.4488 | 0 |
| 1118 | 268.2 | 1.1090 | 0.3017 | 8.0745 | 3.5908 | 0.0000 | 2.3812 | 0.0000 | 3.5647 | 0.0000 | 2.4054 | 0.0000 | 1.8085    | 0.0000 | 2.8139 | 0.0000 | 3.9097 | 0.0000 | 1.4488 | 0 |
| 1119 | 267.9 | 1.1080 | 0.3018 | 8.0823 | 3.5906 | 0.0000 | 2.3811 | 0.0000 | 3.5645 | 0.0000 | 2.4053 | 0.0000 | 1.8084    | 0.0000 | 2.8138 | 0.0000 | 3.9093 | 0.0000 | 1.4488 | 0 |
| 1120 | 267.7 | 1.1070 | 0.3020 | 8.0901 | 3.5903 | 0.0000 | 2.3810 | 0.0000 | 3.5644 | 0.0000 | 2.4053 | 0.0000 | 1.8083    | 0.0000 | 2.8138 | 0.0000 | 3.9090 | 0.0000 | 1.4488 | 0 |
| 1121 | 267.4 | 1.1060 | 0.3022 | 8.0979 | 3.5901 | 0.0000 | 2.3808 | 0.0000 | 3.5643 | 0.0000 | 2.4052 | 0.0000 | 1.8082    | 0.0000 | 2.8137 | 0.0000 | 3.9086 | 0.0000 | 1.4488 | 0 |
| 1122 | 267.2 | 1.1050 | 0.3023 | 8.1058 | 3.5899 | 0.0000 | 2.3807 | 0.0000 | 3.5642 | 0.0000 | 2.4052 | 0.0000 | 1.8081    | 0.0000 | 2.8136 | 0.0000 | 3.9083 | 0.0000 | 1.4488 | 0 |
| 1123 | 267   | 1.1040 | 0.3025 | 8.1136 | 3.5897 | 0.0000 | 2.3806 | 0.0000 | 3.5640 | 0.0000 | 2.4051 | 0.0000 | 1.8080    | 0.0000 | 2.8135 | 0.0000 | 3.9080 | 0.0000 | 1.4488 | 0 |
| 1124 | 266.7 | 1.1031 | 0.3027 | 8.1214 | 3.5895 | 0.0000 | 2.3805 | 0.0000 | 3.5639 | 0.0000 | 2.4050 | 0.0000 | 1.8079    | 0.0000 | 2.8134 | 0.0000 | 3.9076 | 0.0000 | 1.4488 | 0 |
| 1125 | 266.5 | 1.1021 | 0.3028 | 8.1292 | 3.5892 | 0.0000 | 2.3803 | 0.0000 | 3.5638 | 0.0000 | 2.4050 | 0.0000 | 1.8078    | 0.0000 | 2.8133 | 0.0000 | 3.9073 | 0.0000 | 1.4488 | 0 |
| 1126 | 266.2 | 1.1011 | 0.3030 | 8.1370 | 3.5890 | 0.0000 | 2.3802 | 0.0000 | 3.5637 | 0.0000 | 2.4049 | 0.0000 | 1.8078    | 0.0000 | 2.8133 | 0.0000 | 3.9069 | 0.0000 | 1.4488 | 0 |
| 1127 | 266   | 1.1001 | 0.3032 | 8.1448 | 3.5888 | 0.0000 | 2.3801 | 0.0000 | 3.5635 | 0.0000 | 2.4048 | 0.0000 | 1.8077    | 0.0000 | 2.8132 | 0.0000 | 3.9066 | 0.0000 | 1.4488 | 0 |

| nm   | THz   | eV     | Ag     |        | cSi    |        | Fe2O3  |        | GaAs   |        | TiO2   |        | P3HT:PCBM |        | CdTe   |        | aSi    |        | SiO2   |   |
|------|-------|--------|--------|--------|--------|--------|--------|--------|--------|--------|--------|--------|-----------|--------|--------|--------|--------|--------|--------|---|
|      |       |        | n      | k      | n      | k      | n      | k      | n      | k      | n      | k      | n         | k      | n      | k      | n      | k      | n      | k |
| 1128 | 265.8 | 1.0992 | 0.3033 | 8.1527 | 3.5886 | 0.0000 | 2.3800 | 0.0000 | 3.5634 | 0.0000 | 2.4048 | 0.0000 | 1.8076    | 0.0000 | 2.8131 | 0.0000 | 3.9062 | 0.0000 | 1.4488 | 0 |
| 1129 | 265.5 | 1.0982 | 0.3035 | 8.1605 | 3.5884 | 0.0000 | 2.3798 | 0.0000 | 3.5633 | 0.0000 | 2.4047 | 0.0000 | 1.8075    | 0.0000 | 2.8130 | 0.0000 | 3.9059 | 0.0000 | 1.4488 | 0 |
| 1130 | 265.3 | 1.0972 | 0.3037 | 8.1683 | 3.5882 | 0.0000 | 2.3797 | 0.0000 | 3.5632 | 0.0000 | 2.4046 | 0.0000 | 1.8074    | 0.0000 | 2.8129 | 0.0000 | 3.9056 | 0.0000 | 1.4488 | 0 |
| 1131 | 265.1 | 1.0962 | 0.3039 | 8.1761 | 3.5880 | 0.0000 | 2.3796 | 0.0000 | 3.5630 | 0.0000 | 2.4046 | 0.0000 | 1.8073    | 0.0000 | 2.8129 | 0.0000 | 3.9052 | 0.0000 | 1.4488 | 0 |
| 1132 | 264.8 | 1.0953 | 0.3040 | 8.1839 | 3.5878 | 0.0000 | 2.3795 | 0.0000 | 3.5629 | 0.0000 | 2.4045 | 0.0000 | 1.8072    | 0.0000 | 2.8128 | 0.0000 | 3.9049 | 0.0000 | 1.4488 | 0 |
| 1133 | 264.6 | 1.0943 | 0.3042 | 8.1918 | 3.5875 | 0.0000 | 2.3793 | 0.0000 | 3.5628 | 0.0000 | 2.4045 | 0.0000 | 1.8071    | 0.0000 | 2.8127 | 0.0000 | 3.9046 | 0.0000 | 1.4488 | 0 |
| 1134 | 264.4 | 1.0933 | 0.3044 | 8.1996 | 3.5873 | 0.0000 | 2.3792 | 0.0000 | 3.5627 | 0.0000 | 2.4044 | 0.0000 | 1.8070    | 0.0000 | 2.8126 | 0.0000 | 3.9042 | 0.0000 | 1.4488 | 0 |
| 1135 | 264.1 | 1.0924 | 0.3045 | 8.2074 | 3.5871 | 0.0000 | 2.3791 | 0.0000 | 3.5625 | 0.0000 | 2.4043 | 0.0000 | 1.8070    | 0.0000 | 2.8125 | 0.0000 | 3.9039 | 0.0000 | 1.4488 | 0 |
| 1136 | 263.9 | 1.0914 | 0.3047 | 8.2152 | 3.5869 | 0.0000 | 2.3790 | 0.0000 | 3.5624 | 0.0000 | 2.4043 | 0.0000 | 1.8069    | 0.0000 | 2.8125 | 0.0000 | 3.9036 | 0.0000 | 1.4487 | 0 |
| 1137 | 263.7 | 1.0905 | 0.3049 | 8.2230 | 3.5867 | 0.0000 | 2.3789 | 0.0000 | 3.5623 | 0.0000 | 2.4042 | 0.0000 | 1.8068    | 0.0000 | 2.8124 | 0.0000 | 3.9032 | 0.0000 | 1.4487 | 0 |
| 1138 | 263.4 | 1.0895 | 0.3051 | 8.2309 | 3.5865 | 0.0000 | 2.3787 | 0.0000 | 3.5622 | 0.0000 | 2.4042 | 0.0000 | 1.8067    | 0.0000 | 2.8123 | 0.0000 | 3.9029 | 0.0000 | 1.4487 | 0 |
| 1139 | 263.2 | 1.0885 | 0.3052 | 8.2387 | 3.5863 | 0.0000 | 2.3786 | 0.0000 | 3.5621 | 0.0000 | 2.4041 | 0.0000 | 1.8066    | 0.0000 | 2.8122 | 0.0000 | 3.9026 | 0.0000 | 1.4487 | 0 |
| 1140 | 263   | 1.0876 | 0.3054 | 8.2465 | 3.5861 | 0.0000 | 2.3785 | 0.0000 | 3.5619 | 0.0000 | 2.4040 | 0.0000 | 1.8065    | 0.0000 | 2.8122 | 0.0000 | 3.9023 | 0.0000 | 1.4487 | 0 |
| 1141 | 262.7 | 1.0866 | 0.3056 | 8.2543 | 3.5859 | 0.0000 | 2.3784 | 0.0000 | 3.5618 | 0.0000 | 2.4040 | 0.0000 | 1.8064    | 0.0000 | 2.8121 | 0.0000 | 3.9019 | 0.0000 | 1.4487 | 0 |
| 1142 | 262.5 | 1.0857 | 0.3057 | 8.2621 | 3.5857 | 0.0000 | 2.3783 | 0.0000 | 3.5617 | 0.0000 | 2.4039 | 0.0000 | 1.8064    | 0.0000 | 2.8120 | 0.0000 | 3.9016 | 0.0000 | 1.4487 | 0 |
| 1143 | 262.3 | 1.0847 | 0.3059 | 8.2700 | 3.5855 | 0.0000 | 2.3781 | 0.0000 | 3.5616 | 0.0000 | 2.4038 | 0.0000 | 1.8063    | 0.0000 | 2.8119 | 0.0000 | 3.9013 | 0.0000 | 1.4487 | 0 |
| 1144 | 262.1 | 1.0838 | 0.3061 | 8.2778 | 3.5853 | 0.0000 | 2.3780 | 0.0000 | 3.5615 | 0.0000 | 2.4038 | 0.0000 | 1.8062    | 0.0000 | 2.8119 | 0.0000 | 3.9010 | 0.0000 | 1.4487 | 0 |
| 1145 | 261.8 | 1.0828 | 0.3063 | 8.2856 | 3.5851 | 0.0000 | 2.3779 | 0.0000 | 3.5614 | 0.0000 | 2.4037 | 0.0000 | 1.8061    | 0.0000 | 2.8118 | 0.0000 | 3.9006 | 0.0000 | 1.4487 | 0 |
| 1146 | 261.6 | 1.0819 | 0.3064 | 8.2934 | 3.5849 | 0.0000 | 2.3778 | 0.0000 | 3.5612 | 0.0000 | 2.4037 | 0.0000 | 1.8060    | 0.0000 | 2.8117 | 0.0000 | 3.9003 | 0.0000 | 1.4487 | 0 |
| 1147 | 261.4 | 1.0809 | 0.3066 | 8.3013 | 3.5847 | 0.0000 | 2.3777 | 0.0000 | 3.5611 | 0.0000 | 2.4036 | 0.0000 | 1.8059    | 0.0000 | 2.8117 | 0.0000 | 3.9000 | 0.0000 | 1.4487 | 0 |
| 1148 | 261.1 | 1.0800 | 0.3068 | 8.3091 | 3.5845 | 0.0000 | 2.3776 | 0.0000 | 3.5610 | 0.0000 | 2.4035 | 0.0000 | 1.8058    | 0.0000 | 2.8116 | 0.0000 | 3.8997 | 0.0000 | 1.4487 | 0 |
| 1149 | 260.9 | 1.0791 | 0.3069 | 8.3169 | 3.5843 | 0.0000 | 2.3774 | 0.0000 | 3.5609 | 0.0000 | 2.4035 | 0.0000 | 1.8058    | 0.0000 | 2.8115 | 0.0000 | 3.8994 | 0.0000 | 1.4487 | 0 |
| 1150 | 260.7 | 1.0781 | 0.3071 | 8.3247 | 3.5841 | 0.0000 | 2.3773 | 0.0000 | 3.5608 | 0.0000 | 2.4034 | 0.0000 | 1.8057    | 0.0000 | 2.8114 | 0.0000 | 3.8991 | 0.0000 | 1.4487 | 0 |
| 1151 | 260.5 | 1.0772 | 0.3073 | 8.3326 | 3.5839 | 0.0000 | 2.3772 | 0.0000 | 3.5607 | 0.0000 | 2.4034 | 0.0000 | 1.8056    | 0.0000 | 2.8114 | 0.0000 | 3.8988 | 0.0000 | 1.4487 | 0 |
| 1152 | 260.2 | 1.0763 | 0.3075 | 8.3404 | 3.5837 | 0.0000 | 2.3771 | 0.0000 | 3.5605 | 0.0000 | 2.4033 | 0.0000 | 1.8055    | 0.0000 | 2.8113 | 0.0000 | 3.8984 | 0.0000 | 1.4487 | 0 |
| 1153 | 260   | 1.0753 | 0.3076 | 8.3482 | 3.5835 | 0.0000 | 2.3770 | 0.0000 | 3.5604 | 0.0000 | 2.4032 | 0.0000 | 1.8054    | 0.0000 | 2.8112 | 0.0000 | 3.8981 | 0.0000 | 1.4487 | 0 |
| 1154 | 259.8 | 1.0744 | 0.3078 | 8.3560 | 3.5833 | 0.0000 | 2.3769 | 0.0000 | 3.5603 | 0.0000 | 2.4032 | 0.0000 | 1.8054    | 0.0000 | 2.8112 | 0.0000 | 3.8978 | 0.0000 | 1.4487 | 0 |
| 1155 | 259.6 | 1.0735 | 0.3080 | 8.3639 | 3.5831 | 0.0000 | 2.3768 | 0.0000 | 3.5602 | 0.0000 | 2.4031 | 0.0000 | 1.8053    | 0.0000 | 2.8111 | 0.0000 | 3.8975 | 0.0000 | 1.4487 | 0 |
| 1156 | 259.3 | 1.0725 | 0.3082 | 8.3717 | 3.5829 | 0.0000 | 2.3766 | 0.0000 | 3.5601 | 0.0000 | 2.4031 | 0.0000 | 1.8052    | 0.0000 | 2.8110 | 0.0000 | 3.8972 | 0.0000 | 1.4487 | 0 |
| 1157 | 259.1 | 1.0716 | 0.3083 | 8.3795 | 3.5827 | 0.0000 | 2.3765 | 0.0000 | 3.5600 | 0.0000 | 2.4030 | 0.0000 | 1.8051    | 0.0000 | 2.8110 | 0.0000 | 3.8969 | 0.0000 | 1.4487 | 0 |
| 1158 | 258.9 | 1.0707 | 0.3085 | 8.3873 | 3.5825 | 0.0000 | 2.3764 | 0.0000 | 3.5599 | 0.0000 | 2.4030 | 0.0000 | 1.8050    | 0.0000 | 2.8109 | 0.0000 | 3.8966 | 0.0000 | 1.4487 | 0 |
| 1159 | 258.7 | 1.0698 | 0.3087 | 8.3952 | 3.5823 | 0.0000 | 2.3763 | 0.0000 | 3.5598 | 0.0000 | 2.4029 | 0.0000 | 1.8049    | 0.0000 | 2.8108 | 0.0000 | 3.8963 | 0.0000 | 1.4486 | 0 |

| nm   | THz   | eV     | Ag     |        | cSi    |        | Fe2O3  |        | GaAs   |        | TiO2   |        | P3HT:PCBM |        | CdTe   |        | aSi    |        | SiO2   |   |
|------|-------|--------|--------|--------|--------|--------|--------|--------|--------|--------|--------|--------|-----------|--------|--------|--------|--------|--------|--------|---|
|      |       |        | n      | k      | n      | k      | n      | k      | n      | k      | n      | k      | n         | k      | n      | k      | n      | k      | n      | k |
| 1160 | 258.4 | 1.0688 | 0.3088 | 8.4030 | 3.5821 | 0.0000 | 2.3762 | 0.0000 | 3.5596 | 0.0000 | 2.4028 | 0.0000 | 1.8049    | 0.0000 | 2.8108 | 0.0000 | 3.8960 | 0.0000 | 1.4486 | 0 |
| 1161 | 258.2 | 1.0679 | 0.3090 | 8.4108 | 3.5819 | 0.0000 | 2.3761 | 0.0000 | 3.5595 | 0.0000 | 2.4028 | 0.0000 | 1.8048    | 0.0000 | 2.8107 | 0.0000 | 3.8957 | 0.0000 | 1.4486 | 0 |
| 1162 | 258   | 1.0670 | 0.3092 | 8.4186 | 3.5817 | 0.0000 | 2.3760 | 0.0000 | 3.5594 | 0.0000 | 2.4027 | 0.0000 | 1.8047    | 0.0000 | 2.8106 | 0.0000 | 3.8954 | 0.0000 | 1.4486 | 0 |
| 1163 | 257.8 | 1.0661 | 0.3094 | 8.4265 | 3.5815 | 0.0000 | 2.3759 | 0.0000 | 3.5593 | 0.0000 | 2.4027 | 0.0000 | 1.8046    | 0.0000 | 2.8106 | 0.0000 | 3.8951 | 0.0000 | 1.4486 | 0 |
| 1164 | 257.6 | 1.0652 | 0.3095 | 8.4343 | 3.5813 | 0.0000 | 2.3758 | 0.0000 | 3.5592 | 0.0000 | 2.4026 | 0.0000 | 1.8045    | 0.0000 | 2.8105 | 0.0000 | 3.8948 | 0.0000 | 1.4486 | 0 |
| 1165 | 257.3 | 1.0642 | 0.3097 | 8.4421 | 3.5811 | 0.0000 | 2.3757 | 0.0000 | 3.5591 | 0.0000 | 2.4026 | 0.0000 | 1.8045    | 0.0000 | 2.8104 | 0.0000 | 3.8945 | 0.0000 | 1.4486 | 0 |
| 1166 | 257.1 | 1.0633 | 0.3099 | 8.4500 | 3.5809 | 0.0000 | 2.3755 | 0.0000 | 3.5590 | 0.0000 | 2.4025 | 0.0000 | 1.8044    | 0.0000 | 2.8104 | 0.0000 | 3.8942 | 0.0000 | 1.4486 | 0 |
| 1167 | 256.9 | 1.0624 | 0.3101 | 8.4578 | 3.5807 | 0.0000 | 2.3754 | 0.0000 | 3.5589 | 0.0000 | 2.4024 | 0.0000 | 1.8043    | 0.0000 | 2.8103 | 0.0000 | 3.8939 | 0.0000 | 1.4486 | 0 |
| 1168 | 256.7 | 1.0615 | 0.3102 | 8.4656 | 3.5805 | 0.0000 | 2.3753 | 0.0000 | 3.5588 | 0.0000 | 2.4024 | 0.0000 | 1.8042    | 0.0000 | 2.8102 | 0.0000 | 3.8936 | 0.0000 | 1.4486 | 0 |
| 1169 | 256.5 | 1.0606 | 0.3104 | 8.4734 | 3.5803 | 0.0000 | 2.3752 | 0.0000 | 3.5587 | 0.0000 | 2.4023 | 0.0000 | 1.8042    | 0.0000 | 2.8102 | 0.0000 | 3.8933 | 0.0000 | 1.4486 | 0 |
| 1170 | 256.2 | 1.0597 | 0.3106 | 8.4813 | 3.5802 | 0.0000 | 2.3751 | 0.0000 | 3.5586 | 0.0000 | 2.4023 | 0.0000 | 1.8041    | 0.0000 | 2.8101 | 0.0000 | 3.8930 | 0.0000 | 1.4486 | 0 |
| 1171 | 256   | 1.0588 | 0.3108 | 8.4891 | 3.5800 | 0.0000 | 2.3750 | 0.0000 | 3.5585 | 0.0000 | 2.4022 | 0.0000 | 1.8040    | 0.0000 | 2.8101 | 0.0000 | 3.8927 | 0.0000 | 1.4486 | 0 |
| 1172 | 255.8 | 1.0579 | 0.3109 | 8.4969 | 3.5798 | 0.0000 | 2.3749 | 0.0000 | 3.5583 | 0.0000 | 2.4022 | 0.0000 | 1.8039    | 0.0000 | 2.8100 | 0.0000 | 3.8924 | 0.0000 | 1.4486 | 0 |
| 1173 | 255.6 | 1.0570 | 0.3111 | 8.5048 | 3.5796 | 0.0000 | 2.3748 | 0.0000 | 3.5582 | 0.0000 | 2.4021 | 0.0000 | 1.8038    | 0.0000 | 2.8099 | 0.0000 | 3.8921 | 0.0000 | 1.4486 | 0 |
| 1174 | 255.4 | 1.0561 | 0.3113 | 8.5126 | 3.5794 | 0.0000 | 2.3747 | 0.0000 | 3.5581 | 0.0000 | 2.4020 | 0.0000 | 1.8038    | 0.0000 | 2.8099 | 0.0000 | 3.8918 | 0.0000 | 1.4486 | 0 |
| 1175 | 255.1 | 1.0552 | 0.3115 | 8.5204 | 3.5792 | 0.0000 | 2.3746 | 0.0000 | 3.5580 | 0.0000 | 2.4020 | 0.0000 | 1.8037    | 0.0000 | 2.8098 | 0.0000 | 3.8916 | 0.0000 | 1.4486 | 0 |
| 1176 | 254.9 | 1.0543 | 0.3116 | 8.5283 | 3.5790 | 0.0000 | 2.3745 | 0.0000 | 3.5579 | 0.0000 | 2.4019 | 0.0000 | 1.8036    | 0.0000 | 2.8097 | 0.0000 | 3.8913 | 0.0000 | 1.4486 | 0 |
| 1177 | 254.7 | 1.0534 | 0.3118 | 8.5361 | 3.5788 | 0.0000 | 2.3744 | 0.0000 | 3.5578 | 0.0000 | 2.4019 | 0.0000 | 1.8035    | 0.0000 | 2.8097 | 0.0000 | 3.8910 | 0.0000 | 1.4486 | 0 |
| 1178 | 254.5 | 1.0525 | 0.3120 | 8.5439 | 3.5787 | 0.0000 | 2.3743 | 0.0000 | 3.5577 | 0.0000 | 2.4018 | 0.0000 | 1.8035    | 0.0000 | 2.8096 | 0.0000 | 3.8907 | 0.0000 | 1.4486 | 0 |
| 1179 | 254.3 | 1.0516 | 0.3122 | 8.5518 | 3.5785 | 0.0000 | 2.3742 | 0.0000 | 3.5576 | 0.0000 | 2.4018 | 0.0000 | 1.8034    | 0.0000 | 2.8096 | 0.0000 | 3.8904 | 0.0000 | 1.4486 | 0 |
| 1180 | 254.1 | 1.0507 | 0.3123 | 8.5596 | 3.5783 | 0.0000 | 2.3741 | 0.0000 | 3.5575 | 0.0000 | 2.4017 | 0.0000 | 1.8033    | 0.0000 | 2.8095 | 0.0000 | 3.8901 | 0.0000 | 1.4486 | 0 |
| 1181 | 253.8 | 1.0498 | 0.3125 | 8.5674 | 3.5781 | 0.0000 | 2.3740 | 0.0000 | 3.5574 | 0.0000 | 2.4017 | 0.0000 | 1.8032    | 0.0000 | 2.8095 | 0.0000 | 3.8899 | 0.0000 | 1.4486 | 0 |
| 1182 | 253.6 | 1.0489 | 0.3127 | 8.5753 | 3.5779 | 0.0000 | 2.3739 | 0.0000 | 3.5573 | 0.0000 | 2.4016 | 0.0000 | 1.8032    | 0.0000 | 2.8094 | 0.0000 | 3.8896 | 0.0000 | 1.4486 | 0 |
| 1183 | 253.4 | 1.0480 | 0.3129 | 8.5831 | 3.5777 | 0.0000 | 2.3737 | 0.0000 | 3.5572 | 0.0000 | 2.4016 | 0.0000 | 1.8031    | 0.0000 | 2.8093 | 0.0000 | 3.8893 | 0.0000 | 1.4485 | 0 |
| 1184 | 253.2 | 1.0472 | 0.3130 | 8.5909 | 3.5776 | 0.0000 | 2.3736 | 0.0000 | 3.5571 | 0.0000 | 2.4015 | 0.0000 | 1.8030    | 0.0000 | 2.8093 | 0.0000 | 3.8890 | 0.0000 | 1.4485 | 0 |
| 1185 | 253   | 1.0463 | 0.3132 | 8.5988 | 3.5774 | 0.0000 | 2.3735 | 0.0000 | 3.5570 | 0.0000 | 2.4014 | 0.0000 | 1.8029    | 0.0000 | 2.8092 | 0.0000 | 3.8887 | 0.0000 | 1.4485 | 0 |
| 1186 | 252.8 | 1.0454 | 0.3134 | 8.6066 | 3.5772 | 0.0000 | 2.3734 | 0.0000 | 3.5569 | 0.0000 | 2.4014 | 0.0000 | 1.8029    | 0.0000 | 2.8092 | 0.0000 | 3.8885 | 0.0000 | 1.4485 | 0 |
| 1187 | 252.6 | 1.0445 | 0.3136 | 8.6144 | 3.5770 | 0.0000 | 2.3733 | 0.0000 | 3.5568 | 0.0000 | 2.4013 | 0.0000 | 1.8028    | 0.0000 | 2.8091 | 0.0000 | 3.8882 | 0.0000 | 1.4485 | 0 |
| 1188 | 252.4 | 1.0436 | 0.3138 | 8.6223 | 3.5768 | 0.0000 | 2.3732 | 0.0000 | 3.5567 | 0.0000 | 2.4013 | 0.0000 | 1.8027    | 0.0000 | 2.8091 | 0.0000 | 3.8879 | 0.0000 | 1.4485 | 0 |
| 1189 | 252.1 | 1.0428 | 0.3139 | 8.6301 | 3.5767 | 0.0000 | 2.3731 | 0.0000 | 3.5566 | 0.0000 | 2.4012 | 0.0000 | 1.8027    | 0.0000 | 2.8090 | 0.0000 | 3.8876 | 0.0000 | 1.4485 | 0 |
| 1190 | 251.9 | 1.0419 | 0.3141 | 8.6379 | 3.5765 | 0.0000 | 2.3730 | 0.0000 | 3.5565 | 0.0000 | 2.4012 | 0.0000 | 1.8026    | 0.0000 | 2.8090 | 0.0000 | 3.8874 | 0.0000 | 1.4485 | 0 |
| 1191 | 251.7 | 1.0410 | 0.3143 | 8.6458 | 3.5763 | 0.0000 | 2.3729 | 0.0000 | 3.5564 | 0.0000 | 2.4011 | 0.0000 | 1.8025    | 0.0000 | 2.8089 | 0.0000 | 3.8871 | 0.0000 | 1.4485 | 0 |

| nm   | THz   | eV     | Ag     |        | cSi    |        | Fe2O3  |        | GaAs   |        | TiO2   |        | P3HT:PCBM |        | CdTe   |        | aSi    |        | SiO2   |   |
|------|-------|--------|--------|--------|--------|--------|--------|--------|--------|--------|--------|--------|-----------|--------|--------|--------|--------|--------|--------|---|
|      |       |        | n      | k      | n      | k      | n      | k      | n      | k      | n      | k      | n         | k      | n      | k      | n      | k      | n      | k |
| 1192 | 251.5 | 1.0401 | 0.3145 | 8.6536 | 3.5761 | 0.0000 | 2.3728 | 0.0000 | 3.5563 | 0.0000 | 2.4011 | 0.0000 | 1.8024    | 0.0000 | 2.8088 | 0.0000 | 3.8868 | 0.0000 | 1.4485 | 0 |
| 1193 | 251.3 | 1.0393 | 0.3146 | 8.6615 | 3.5759 | 0.0000 | 2.3727 | 0.0000 | 3.5562 | 0.0000 | 2.4010 | 0.0000 | 1.8024    | 0.0000 | 2.8088 | 0.0000 | 3.8865 | 0.0000 | 1.4485 | 0 |
| 1194 | 251.1 | 1.0384 | 0.3148 | 8.6693 | 3.5758 | 0.0000 | 2.3726 | 0.0000 | 3.5561 | 0.0000 | 2.4010 | 0.0000 | 1.8023    | 0.0000 | 2.8087 | 0.0000 | 3.8863 | 0.0000 | 1.4485 | 0 |
| 1195 | 250.9 | 1.0375 | 0.3150 | 8.6771 | 3.5756 | 0.0000 | 2.3725 | 0.0000 | 3.5560 | 0.0000 | 2.4009 | 0.0000 | 1.8022    | 0.0000 | 2.8087 | 0.0000 | 3.8860 | 0.0000 | 1.4485 | 0 |
| 1196 | 250.7 | 1.0367 | 0.3152 | 8.6850 | 3.5754 | 0.0000 | 2.3724 | 0.0000 | 3.5559 | 0.0000 | 2.4009 | 0.0000 | 1.8022    | 0.0000 | 2.8086 | 0.0000 | 3.8857 | 0.0000 | 1.4485 | 0 |
| 1197 | 250.5 | 1.0358 | 0.3153 | 8.6928 | 3.5752 | 0.0000 | 2.3723 | 0.0000 | 3.5558 | 0.0000 | 2.4008 | 0.0000 | 1.8021    | 0.0000 | 2.8086 | 0.0000 | 3.8855 | 0.0000 | 1.4485 | 0 |
| 1198 | 250.2 | 1.0349 | 0.3155 | 8.7006 | 3.5751 | 0.0000 | 2.3723 | 0.0000 | 3.5557 | 0.0000 | 2.4008 | 0.0000 | 1.8020    | 0.0000 | 2.8085 | 0.0000 | 3.8852 | 0.0000 | 1.4485 | 0 |
| 1199 | 250   | 1.0341 | 0.3157 | 8.7085 | 3.5749 | 0.0000 | 2.3722 | 0.0000 | 3.5556 | 0.0000 | 2.4007 | 0.0000 | 1.8019    | 0.0000 | 2.8085 | 0.0000 | 3.8849 | 0.0000 | 1.4485 | 0 |
| 1200 | 249.8 | 1.0332 | 0.3159 | 8.7163 | 3.5747 | 0.0000 | 2.3721 | 0.0000 | 3.5555 | 0.0000 | 2.4007 | 0.0000 | 1.8019    | 0.0000 | 2.8084 | 0.0000 | 3.8847 | 0.0000 | 1.4485 | 0 |
| 1201 | 249.6 | 1.0323 | 0.3161 | 8.7242 | 3.5745 | 0.0000 | 2.3720 | 0.0000 | 3.5554 | 0.0000 | 2.4006 | 0.0000 | 1.8018    | 0.0000 | 2.8084 | 0.0000 | 3.8844 | 0.0000 | 1.4485 | 0 |
| 1202 | 249.4 | 1.0315 | 0.3162 | 8.7320 | 3.5744 | 0.0000 | 2.3719 | 0.0000 | 3.5553 | 0.0000 | 2.4005 | 0.0000 | 1.8017    | 0.0000 | 2.8083 | 0.0000 | 3.8841 | 0.0000 | 1.4485 | 0 |
| 1203 | 249.2 | 1.0306 | 0.3164 | 8.7398 | 3.5742 | 0.0000 | 2.3718 | 0.0000 | 3.5552 | 0.0000 | 2.4005 | 0.0000 | 1.8017    | 0.0000 | 2.8083 | 0.0000 | 3.8839 | 0.0000 | 1.4485 | 0 |
| 1204 | 249   | 1.0298 | 0.3166 | 8.7477 | 3.5740 | 0.0000 | 2.3717 | 0.0000 | 3.5551 | 0.0000 | 2.4004 | 0.0000 | 1.8016    | 0.0000 | 2.8082 | 0.0000 | 3.8836 | 0.0000 | 1.4485 | 0 |
| 1205 | 248.8 | 1.0289 | 0.3168 | 8.7555 | 3.5738 | 0.0000 | 2.3716 | 0.0000 | 3.5550 | 0.0000 | 2.4004 | 0.0000 | 1.8015    | 0.0000 | 2.8082 | 0.0000 | 3.8834 | 0.0000 | 1.4485 | 0 |
| 1206 | 248.6 | 1.0281 | 0.3170 | 8.7634 | 3.5737 | 0.0000 | 2.3715 | 0.0000 | 3.5550 | 0.0000 | 2.4003 | 0.0000 | 1.8015    | 0.0000 | 2.8081 | 0.0000 | 3.8831 | 0.0000 | 1.4485 | 0 |
| 1207 | 248.4 | 1.0272 | 0.3171 | 8.7712 | 3.5735 | 0.0000 | 2.3714 | 0.0000 | 3.5549 | 0.0000 | 2.4003 | 0.0000 | 1.8014    | 0.0000 | 2.8081 | 0.0000 | 3.8828 | 0.0000 | 1.4485 | 0 |
| 1208 | 248.2 | 1.0264 | 0.3173 | 8.7791 | 3.5733 | 0.0000 | 2.3713 | 0.0000 | 3.5548 | 0.0000 | 2.4002 | 0.0000 | 1.8013    | 0.0000 | 2.8080 | 0.0000 | 3.8826 | 0.0000 | 1.4485 | 0 |
| 1209 | 248   | 1.0255 | 0.3175 | 8.7869 | 3.5732 | 0.0000 | 2.3712 | 0.0000 | 3.5547 | 0.0000 | 2.4002 | 0.0000 | 1.8013    | 0.0000 | 2.8080 | 0.0000 | 3.8823 | 0.0000 | 1.4484 | 0 |
| 1210 | 247.8 | 1.0247 | 0.3177 | 8.7947 | 3.5730 | 0.0000 | 2.3711 | 0.0000 | 3.5546 | 0.0000 | 2.4001 | 0.0000 | 1.8012    | 0.0000 | 2.8079 | 0.0000 | 3.8821 | 0.0000 | 1.4484 | 0 |
| 1211 | 247.6 | 1.0238 | 0.3179 | 8.8026 | 3.5728 | 0.0000 | 2.3710 | 0.0000 | 3.5545 | 0.0000 | 2.4001 | 0.0000 | 1.8011    | 0.0000 | 2.8079 | 0.0000 | 3.8818 | 0.0000 | 1.4484 | 0 |
| 1212 | 247.4 | 1.0230 | 0.3180 | 8.8104 | 3.5726 | 0.0000 | 2.3709 | 0.0000 | 3.5544 | 0.0000 | 2.4000 | 0.0000 | 1.8011    | 0.0000 | 2.8079 | 0.0000 | 3.8816 | 0.0000 | 1.4484 | 0 |
| 1213 | 247.2 | 1.0221 | 0.3182 | 8.8183 | 3.5725 | 0.0000 | 2.3708 | 0.0000 | 3.5543 | 0.0000 | 2.4000 | 0.0000 | 1.8010    | 0.0000 | 2.8078 | 0.0000 | 3.8813 | 0.0000 | 1.4484 | 0 |
| 1214 | 246.9 | 1.0213 | 0.3184 | 8.8261 | 3.5723 | 0.0000 | 2.3707 | 0.0000 | 3.5542 | 0.0000 | 2.3999 | 0.0000 | 1.8009    | 0.0000 | 2.8078 | 0.0000 | 3.8811 | 0.0000 | 1.4484 | 0 |
| 1215 | 246.7 | 1.0204 | 0.3186 | 8.8340 | 3.5721 | 0.0000 | 2.3706 | 0.0000 | 3.5541 | 0.0000 | 2.3999 | 0.0000 | 1.8009    | 0.0000 | 2.8077 | 0.0000 | 3.8808 | 0.0000 | 1.4484 | 0 |
| 1216 | 246.5 | 1.0196 | 0.3188 | 8.8418 | 3.5720 | 0.0000 | 2.3706 | 0.0000 | 3.5540 | 0.0000 | 2.3998 | 0.0000 | 1.8008    | 0.0000 | 2.8077 | 0.0000 | 3.8806 | 0.0000 | 1.4484 | 0 |
| 1217 | 246.3 | 1.0188 | 0.3189 | 8.8497 | 3.5718 | 0.0000 | 2.3705 | 0.0000 | 3.5539 | 0.0000 | 2.3998 | 0.0000 | 1.8007    | 0.0000 | 2.8076 | 0.0000 | 3.8803 | 0.0000 | 1.4484 | 0 |
| 1218 | 246.1 | 1.0179 | 0.3191 | 8.8575 | 3.5716 | 0.0000 | 2.3704 | 0.0000 | 3.5538 | 0.0000 | 2.3997 | 0.0000 | 1.8007    | 0.0000 | 2.8076 | 0.0000 | 3.8801 | 0.0000 | 1.4484 | 0 |
| 1219 | 245.9 | 1.0171 | 0.3193 | 8.8654 | 3.5715 | 0.0000 | 2.3703 | 0.0000 | 3.5538 | 0.0000 | 2.3997 | 0.0000 | 1.8006    | 0.0000 | 2.8075 | 0.0000 | 3.8798 | 0.0000 | 1.4484 | 0 |
| 1220 | 245.7 | 1.0163 | 0.3195 | 8.8732 | 3.5713 | 0.0000 | 2.3702 | 0.0000 | 3.5537 | 0.0000 | 2.3996 | 0.0000 | 1.8005    | 0.0000 | 2.8075 | 0.0000 | 3.8796 | 0.0000 | 1.4484 | 0 |
| 1221 | 245.5 | 1.0154 | 0.3197 | 8.8810 | 3.5711 | 0.0000 | 2.3701 | 0.0000 | 3.5536 | 0.0000 | 2.3996 | 0.0000 | 1.8005    | 0.0000 | 2.8075 | 0.0000 | 3.8793 | 0.0000 | 1.4484 | 0 |
| 1222 | 245.3 | 1.0146 | 0.3198 | 8.8889 | 3.5710 | 0.0000 | 2.3700 | 0.0000 | 3.5535 | 0.0000 | 2.3995 | 0.0000 | 1.8004    | 0.0000 | 2.8074 | 0.0000 | 3.8791 | 0.0000 | 1.4484 | 0 |
| 1223 | 245.1 | 1.0138 | 0.3200 | 8.8967 | 3.5708 | 0.0000 | 2.3699 | 0.0000 | 3.5534 | 0.0000 | 2.3995 | 0.0000 | 1.8003    | 0.0000 | 2.8074 | 0.0000 | 3.8788 | 0.0000 | 1.4484 | 0 |



| nm   | THz   | eV     | Ag     |        | cSi    |        | Fe2O3  |        | GaAs   |        | TiO2   |        | P3HT:PCBM |        | CdTe   |        | aSi    |        | SiO2   |   |
|------|-------|--------|--------|--------|--------|--------|--------|--------|--------|--------|--------|--------|-----------|--------|--------|--------|--------|--------|--------|---|
|      |       |        | n      | k      | n      | k      | n      | k      | n      | k      | n      | k      | n         | k      | n      | k      | n      | k      | n      | k |
| 1224 | 244.9 | 1.0129 | 0.3202 | 8.9046 | 3.5707 | 0.0000 | 2.3698 | 0.0000 | 3.5533 | 0.0000 | 2.3994 | 0.0000 | 1.8003    | 0.0000 | 2.8073 | 0.0000 | 3.8786 | 0.0000 | 1.4484 | 0 |
| 1225 | 244.7 | 1.0121 | 0.3204 | 8.9124 | 3.5705 | 0.0000 | 2.3697 | 0.0000 | 3.5532 | 0.0000 | 2.3994 | 0.0000 | 1.8002    | 0.0000 | 2.8073 | 0.0000 | 3.8783 | 0.0000 | 1.4484 | 0 |
| 1226 | 244.5 | 1.0113 | 0.3206 | 8.9203 | 3.5703 | 0.0000 | 2.3697 | 0.0000 | 3.5531 | 0.0000 | 2.3993 | 0.0000 | 1.8001    | 0.0000 | 2.8072 | 0.0000 | 3.8781 | 0.0000 | 1.4484 | 0 |
| 1227 | 244.3 | 1.0105 | 0.3207 | 8.9281 | 3.5702 | 0.0000 | 2.3696 | 0.0000 | 3.5530 | 0.0000 | 2.3993 | 0.0000 | 1.8001    | 0.0000 | 2.8072 | 0.0000 | 3.8779 | 0.0000 | 1.4484 | 0 |
| 1228 | 244.1 | 1.0096 | 0.3209 | 8.9360 | 3.5700 | 0.0000 | 2.3695 | 0.0000 | 3.5530 | 0.0000 | 2.3993 | 0.0000 | 1.8000    | 0.0000 | 2.8072 | 0.0000 | 3.8776 | 0.0000 | 1.4484 | 0 |
| 1229 | 243.9 | 1.0088 | 0.3211 | 8.9438 | 3.5698 | 0.0000 | 2.3694 | 0.0000 | 3.5529 | 0.0000 | 2.3992 | 0.0000 | 1.7999    | 0.0000 | 2.8071 | 0.0000 | 3.8774 | 0.0000 | 1.4484 | 0 |
| 1230 | 243.7 | 1.0080 | 0.3213 | 8.9517 | 3.5697 | 0.0000 | 2.3693 | 0.0000 | 3.5528 | 0.0000 | 2.3992 | 0.0000 | 1.7999    | 0.0000 | 2.8071 | 0.0000 | 3.8771 | 0.0000 | 1.4484 | 0 |
| 1231 | 243.5 | 1.0072 | 0.3215 | 8.9596 | 3.5695 | 0.0000 | 2.3692 | 0.0000 | 3.5527 | 0.0000 | 2.3991 | 0.0000 | 1.7998    | 0.0000 | 2.8070 | 0.0000 | 3.8769 | 0.0000 | 1.4484 | 0 |
| 1232 | 243.3 | 1.0064 | 0.3217 | 8.9674 | 3.5694 | 0.0000 | 2.3691 | 0.0000 | 3.5526 | 0.0000 | 2.3991 | 0.0000 | 1.7998    | 0.0000 | 2.8070 | 0.0000 | 3.8767 | 0.0000 | 1.4484 | 0 |
| 1233 | 243.1 | 1.0055 | 0.3218 | 8.9753 | 3.5692 | 0.0000 | 2.3690 | 0.0000 | 3.5525 | 0.0000 | 2.3990 | 0.0000 | 1.7997    | 0.0000 | 2.8070 | 0.0000 | 3.8764 | 0.0000 | 1.4484 | 0 |
| 1234 | 242.9 | 1.0047 | 0.3220 | 8.9831 | 3.5690 | 0.0000 | 2.3690 | 0.0000 | 3.5524 | 0.0000 | 2.3990 | 0.0000 | 1.7996    | 0.0000 | 2.8069 | 0.0000 | 3.8762 | 0.0000 | 1.4484 | 0 |
| 1235 | 242.7 | 1.0039 | 0.3222 | 8.9910 | 3.5689 | 0.0000 | 2.3689 | 0.0000 | 3.5524 | 0.0000 | 2.3989 | 0.0000 | 1.7996    | 0.0000 | 2.8069 | 0.0000 | 3.8760 | 0.0000 | 1.4484 | 0 |
| 1236 | 242.6 | 1.0031 | 0.3224 | 8.9988 | 3.5687 | 0.0000 | 2.3688 | 0.0000 | 3.5523 | 0.0000 | 2.3989 | 0.0000 | 1.7995    | 0.0000 | 2.8069 | 0.0000 | 3.8757 | 0.0000 | 1.4484 | 0 |
| 1237 | 242.4 | 1.0023 | 0.3226 | 9.0067 | 3.5686 | 0.0000 | 2.3687 | 0.0000 | 3.5522 | 0.0000 | 2.3988 | 0.0000 | 1.7994    | 0.0000 | 2.8068 | 0.0000 | 3.8755 | 0.0000 | 1.4483 | 0 |
| 1238 | 242.2 | 1.0015 | 0.3228 | 9.0145 | 3.5684 | 0.0000 | 2.3686 | 0.0000 | 3.5521 | 0.0000 | 2.3988 | 0.0000 | 1.7994    | 0.0000 | 2.8068 | 0.0000 | 3.8753 | 0.0000 | 1.4483 | 0 |
| 1239 | 242   | 1.0007 | 0.3229 | 9.0224 | 3.5683 | 0.0000 | 2.3685 | 0.0000 | 3.5520 | 0.0000 | 2.3987 | 0.0000 | 1.7993    | 0.0000 | 2.8067 | 0.0000 | 3.8750 | 0.0000 | 1.4483 | 0 |
| 1240 | 241.8 | 0.9999 | 0.3231 | 9.0302 | 3.5681 | 0.0000 | 2.3684 | 0.0000 | 3.5519 | 0.0000 | 2.3987 | 0.0000 | 1.7993    | 0.0000 | 2.8067 | 0.0000 | 3.8748 | 0.0000 | 1.4483 | 0 |
| 1241 | 241.6 | 0.9991 | 0.3233 | 9.0381 | 3.5679 | 0.0000 | 2.3684 | 0.0000 | 3.5518 | 0.0000 | 2.3986 | 0.0000 | 1.7992    | 0.0000 | 2.8067 | 0.0000 | 3.8746 | 0.0000 | 1.4483 | 0 |
| 1242 | 241.4 | 0.9983 | 0.3235 | 9.0459 | 3.5678 | 0.0000 | 2.3683 | 0.0000 | 3.5518 | 0.0000 | 2.3986 | 0.0000 | 1.7991    | 0.0000 | 2.8066 | 0.0000 | 3.8743 | 0.0000 | 1.4483 | 0 |
| 1243 | 241.2 | 0.9975 | 0.3237 | 9.0538 | 3.5676 | 0.0000 | 2.3682 | 0.0000 | 3.5517 | 0.0000 | 2.3985 | 0.0000 | 1.7991    | 0.0000 | 2.8066 | 0.0000 | 3.8741 | 0.0000 | 1.4483 | 0 |
| 1244 | 241   | 0.9967 | 0.3239 | 9.0617 | 3.5675 | 0.0000 | 2.3681 | 0.0000 | 3.5516 | 0.0000 | 2.3985 | 0.0000 | 1.7990    | 0.0000 | 2.8066 | 0.0000 | 3.8739 | 0.0000 | 1.4483 | 0 |
| 1245 | 240.8 | 0.9959 | 0.3240 | 9.0695 | 3.5673 | 0.0000 | 2.3680 | 0.0000 | 3.5515 | 0.0000 | 2.3984 | 0.0000 | 1.7990    | 0.0000 | 2.8065 | 0.0000 | 3.8736 | 0.0000 | 1.4483 | 0 |
| 1246 | 240.6 | 0.9951 | 0.3242 | 9.0774 | 3.5672 | 0.0000 | 2.3679 | 0.0000 | 3.5514 | 0.0000 | 2.3984 | 0.0000 | 1.7989    | 0.0000 | 2.8065 | 0.0000 | 3.8734 | 0.0000 | 1.4483 | 0 |
| 1247 | 240.4 | 0.9943 | 0.3244 | 9.0852 | 3.5670 | 0.0000 | 2.3679 | 0.0000 | 3.5513 | 0.0000 | 2.3984 | 0.0000 | 1.7988    | 0.0000 | 2.8065 | 0.0000 | 3.8732 | 0.0000 | 1.4483 | 0 |
| 1248 | 240.2 | 0.9935 | 0.3246 | 9.0931 | 3.5669 | 0.0000 | 2.3678 | 0.0000 | 3.5513 | 0.0000 | 2.3983 | 0.0000 | 1.7988    | 0.0000 | 2.8064 | 0.0000 | 3.8730 | 0.0000 | 1.4483 | 0 |
| 1249 | 240   | 0.9927 | 0.3248 | 9.1010 | 3.5667 | 0.0000 | 2.3677 | 0.0000 | 3.5512 | 0.0000 | 2.3983 | 0.0000 | 1.7987    | 0.0000 | 2.8064 | 0.0000 | 3.8727 | 0.0000 | 1.4483 | 0 |
| 1250 | 239.8 | 0.9919 | 0.3250 | 9.1088 | 3.5665 | 0.0000 | 2.3676 | 0.0000 | 3.5511 | 0.0000 | 2.3982 | 0.0000 | 1.7987    | 0.0000 | 2.8064 | 0.0000 | 3.8725 | 0.0000 | 1.4483 | 0 |
| 1251 | 239.6 | 0.9911 | 0.3251 | 9.1167 | 3.5664 | 0.0000 | 2.3675 | 0.0000 | 3.5510 | 0.0000 | 2.3982 | 0.0000 | 1.7986    | 0.0000 | 2.8063 | 0.0000 | 3.8723 | 0.0000 | 1.4483 | 0 |
| 1252 | 239.5 | 0.9903 | 0.3253 | 9.1245 | 3.5662 | 0.0000 | 2.3674 | 0.0000 | 3.5509 | 0.0000 | 2.3981 | 0.0000 | 1.7985    | 0.0000 | 2.8063 | 0.0000 | 3.8721 | 0.0000 | 1.4483 | 0 |
| 1253 | 239.3 | 0.9895 | 0.3255 | 9.1324 | 3.5661 | 0.0000 | 2.3674 | 0.0000 | 3.5509 | 0.0000 | 2.3981 | 0.0000 | 1.7985    | 0.0000 | 2.8063 | 0.0000 | 3.8718 | 0.0000 | 1.4483 | 0 |
| 1254 | 239.1 | 0.9887 | 0.3257 | 9.1403 | 3.5659 | 0.0000 | 2.3673 | 0.0000 | 3.5508 | 0.0000 | 2.3980 | 0.0000 | 1.7984    | 0.0000 | 2.8062 | 0.0000 | 3.8716 | 0.0000 | 1.4483 | 0 |
| 1255 | 238.9 | 0.9879 | 0.3259 | 9.1481 | 3.5658 | 0.0000 | 2.3672 | 0.0000 | 3.5507 | 0.0000 | 2.3980 | 0.0000 | 1.7984    | 0.0000 | 2.8062 | 0.0000 | 3.8714 | 0.0000 | 1.4483 | 0 |

| nm   | THz   | eV     | Ag     |        | cSi    |        | Fe2O3  |        | GaAs   |        | TiO2   |        | P3HT:PCBM |        | CdTe   |        | aSi    |        | SiO2   |   |
|------|-------|--------|--------|--------|--------|--------|--------|--------|--------|--------|--------|--------|-----------|--------|--------|--------|--------|--------|--------|---|
|      |       |        | n      | k      | n      | k      | n      | k      | n      | k      | n      | k      | n         | k      | n      | k      | n      | k      | n      | k |
| 1256 | 238.7 | 0.9871 | 0.3261 | 9.1560 | 3.5656 | 0.0000 | 2.3671 | 0.0000 | 3.5506 | 0.0000 | 2.3979 | 0.0000 | 1.7983    | 0.0000 | 2.8062 | 0.0000 | 3.8712 | 0.0000 | 1.4483 | 0 |
| 1257 | 238.5 | 0.9863 | 0.3263 | 9.1638 | 3.5655 | 0.0000 | 2.3670 | 0.0000 | 3.5505 | 0.0000 | 2.3979 | 0.0000 | 1.7982    | 0.0000 | 2.8061 | 0.0000 | 3.8710 | 0.0000 | 1.4483 | 0 |
| 1258 | 238.3 | 0.9856 | 0.3264 | 9.1717 | 3.5653 | 0.0000 | 2.3670 | 0.0000 | 3.5505 | 0.0000 | 2.3979 | 0.0000 | 1.7982    | 0.0000 | 2.8061 | 0.0000 | 3.8707 | 0.0000 | 1.4483 | 0 |
| 1259 | 238.1 | 0.9848 | 0.3266 | 9.1796 | 3.5652 | 0.0000 | 2.3669 | 0.0000 | 3.5504 | 0.0000 | 2.3978 | 0.0000 | 1.7981    | 0.0000 | 2.8061 | 0.0000 | 3.8705 | 0.0000 | 1.4483 | 0 |
| 1260 | 237.9 | 0.9840 | 0.3268 | 9.1874 | 3.5650 | 0.0000 | 2.3668 | 0.0000 | 3.5503 | 0.0000 | 2.3978 | 0.0000 | 1.7981    | 0.0000 | 2.8060 | 0.0000 | 3.8703 | 0.0000 | 1.4483 | 0 |
| 1261 | 237.7 | 0.9832 | 0.3270 | 9.1953 | 3.5649 | 0.0000 | 2.3667 | 0.0000 | 3.5502 | 0.0000 | 2.3977 | 0.0000 | 1.7980    | 0.0000 | 2.8060 | 0.0000 | 3.8701 | 0.0000 | 1.4483 | 0 |
| 1262 | 237.6 | 0.9824 | 0.3272 | 9.2032 | 3.5647 | 0.0000 | 2.3666 | 0.0000 | 3.5501 | 0.0000 | 2.3977 | 0.0000 | 1.7980    | 0.0000 | 2.8060 | 0.0000 | 3.8699 | 0.0000 | 1.4483 | 0 |
| 1263 | 237.4 | 0.9817 | 0.3274 | 9.2110 | 3.5646 | 0.0000 | 2.3666 | 0.0000 | 3.5501 | 0.0000 | 2.3976 | 0.0000 | 1.7979    | 0.0000 | 2.8060 | 0.0000 | 3.8697 | 0.0000 | 1.4483 | 0 |
| 1264 | 237.2 | 0.9809 | 0.3276 | 9.2189 | 3.5644 | 0.0000 | 2.3665 | 0.0000 | 3.5500 | 0.0000 | 2.3976 | 0.0000 | 1.7978    | 0.0000 | 2.8059 | 0.0000 | 3.8694 | 0.0000 | 1.4483 | 0 |
| 1265 | 237   | 0.9801 | 0.3278 | 9.2268 | 3.5643 | 0.0000 | 2.3664 | 0.0000 | 3.5499 | 0.0000 | 2.3975 | 0.0000 | 1.7978    | 0.0000 | 2.8059 | 0.0000 | 3.8692 | 0.0000 | 1.4483 | 0 |
| 1266 | 236.8 | 0.9793 | 0.3279 | 9.2346 | 3.5642 | 0.0000 | 2.3663 | 0.0000 | 3.5498 | 0.0000 | 2.3975 | 0.0000 | 1.7977    | 0.0000 | 2.8059 | 0.0000 | 3.8690 | 0.0000 | 1.4482 | 0 |
| 1267 | 236.6 | 0.9786 | 0.3281 | 9.2425 | 3.5640 | 0.0000 | 2.3663 | 0.0000 | 3.5498 | 0.0000 | 2.3975 | 0.0000 | 1.7977    | 0.0000 | 2.8058 | 0.0000 | 3.8688 | 0.0000 | 1.4482 | 0 |
| 1268 | 236.4 | 0.9778 | 0.3283 | 9.2504 | 3.5639 | 0.0000 | 2.3662 | 0.0000 | 3.5497 | 0.0000 | 2.3974 | 0.0000 | 1.7976    | 0.0000 | 2.8058 | 0.0000 | 3.8686 | 0.0000 | 1.4482 | 0 |
| 1269 | 236.2 | 0.9770 | 0.3285 | 9.2582 | 3.5637 | 0.0000 | 2.3661 | 0.0000 | 3.5496 | 0.0000 | 2.3974 | 0.0000 | 1.7976    | 0.0000 | 2.8058 | 0.0000 | 3.8684 | 0.0000 | 1.4482 | 0 |
| 1270 | 236.1 | 0.9763 | 0.3287 | 9.2661 | 3.5636 | 0.0000 | 2.3660 | 0.0000 | 3.5495 | 0.0000 | 2.3973 | 0.0000 | 1.7975    | 0.0000 | 2.8058 | 0.0000 | 3.8682 | 0.0000 | 1.4482 | 0 |
| 1271 | 235.9 | 0.9755 | 0.3289 | 9.2740 | 3.5634 | 0.0000 | 2.3659 | 0.0000 | 3.5495 | 0.0000 | 2.3973 | 0.0000 | 1.7975    | 0.0000 | 2.8057 | 0.0000 | 3.8680 | 0.0000 | 1.4482 | 0 |
| 1272 | 235.7 | 0.9747 | 0.3291 | 9.2818 | 3.5633 | 0.0000 | 2.3659 | 0.0000 | 3.5494 | 0.0000 | 2.3972 | 0.0000 | 1.7974    | 0.0000 | 2.8057 | 0.0000 | 3.8677 | 0.0000 | 1.4482 | 0 |
| 1273 | 235.5 | 0.9740 | 0.3293 | 9.2897 | 3.5631 | 0.0000 | 2.3658 | 0.0000 | 3.5493 | 0.0000 | 2.3972 | 0.0000 | 1.7973    | 0.0000 | 2.8057 | 0.0000 | 3.8675 | 0.0000 | 1.4482 | 0 |
| 1274 | 235.3 | 0.9732 | 0.3294 | 9.2976 | 3.5630 | 0.0000 | 2.3657 | 0.0000 | 3.5492 | 0.0000 | 2.3972 | 0.0000 | 1.7973    | 0.0000 | 2.8056 | 0.0000 | 3.8673 | 0.0000 | 1.4482 | 0 |
| 1275 | 235.1 | 0.9724 | 0.3296 | 9.3055 | 3.5629 | 0.0000 | 2.3656 | 0.0000 | 3.5491 | 0.0000 | 2.3971 | 0.0000 | 1.7972    | 0.0000 | 2.8056 | 0.0000 | 3.8671 | 0.0000 | 1.4482 | 0 |
| 1276 | 234.9 | 0.9717 | 0.3298 | 9.3133 | 3.5627 | 0.0000 | 2.3656 | 0.0000 | 3.5491 | 0.0000 | 2.3971 | 0.0000 | 1.7972    | 0.0000 | 2.8056 | 0.0000 | 3.8669 | 0.0000 | 1.4482 | 0 |
| 1277 | 234.8 | 0.9709 | 0.3300 | 9.3212 | 3.5626 | 0.0000 | 2.3655 | 0.0000 | 3.5490 | 0.0000 | 2.3970 | 0.0000 | 1.7971    | 0.0000 | 2.8056 | 0.0000 | 3.8667 | 0.0000 | 1.4482 | 0 |
| 1278 | 234.6 | 0.9701 | 0.3302 | 9.3291 | 3.5624 | 0.0000 | 2.3654 | 0.0000 | 3.5489 | 0.0000 | 2.3970 | 0.0000 | 1.7971    | 0.0000 | 2.8055 | 0.0000 | 3.8665 | 0.0000 | 1.4482 | 0 |
| 1279 | 234.4 | 0.9694 | 0.3304 | 9.3369 | 3.5623 | 0.0000 | 2.3653 | 0.0000 | 3.5489 | 0.0000 | 2.3969 | 0.0000 | 1.7970    | 0.0000 | 2.8055 | 0.0000 | 3.8663 | 0.0000 | 1.4482 | 0 |
| 1280 | 234.2 | 0.9686 | 0.3306 | 9.3448 | 3.5621 | 0.0000 | 2.3653 | 0.0000 | 3.5488 | 0.0000 | 2.3969 | 0.0000 | 1.7970    | 0.0000 | 2.8055 | 0.0000 | 3.8661 | 0.0000 | 1.4482 | 0 |
| 1281 | 234   | 0.9679 | 0.3308 | 9.3527 | 3.5620 | 0.0000 | 2.3652 | 0.0000 | 3.5487 | 0.0000 | 2.3969 | 0.0000 | 1.7969    | 0.0000 | 2.8055 | 0.0000 | 3.8659 | 0.0000 | 1.4482 | 0 |
| 1282 | 233.8 | 0.9671 | 0.3309 | 9.3606 | 3.5619 | 0.0000 | 2.3651 | 0.0000 | 3.5486 | 0.0000 | 2.3968 | 0.0000 | 1.7968    | 0.0000 | 2.8055 | 0.0000 | 3.8657 | 0.0000 | 1.4482 | 0 |
| 1283 | 233.7 | 0.9664 | 0.3311 | 9.3684 | 3.5617 | 0.0000 | 2.3650 | 0.0000 | 3.5486 | 0.0000 | 2.3968 | 0.0000 | 1.7968    | 0.0000 | 2.8054 | 0.0000 | 3.8655 | 0.0000 | 1.4482 | 0 |
| 1284 | 233.5 | 0.9656 | 0.3313 | 9.3763 | 3.5616 | 0.0000 | 2.3650 | 0.0000 | 3.5485 | 0.0000 | 2.3967 | 0.0000 | 1.7967    | 0.0000 | 2.8054 | 0.0000 | 3.8653 | 0.0000 | 1.4482 | 0 |
| 1285 | 233.3 | 0.9649 | 0.3315 | 9.3842 | 3.5614 | 0.0000 | 2.3649 | 0.0000 | 3.5484 | 0.0000 | 2.3967 | 0.0000 | 1.7967    | 0.0000 | 2.8054 | 0.0000 | 3.8651 | 0.0000 | 1.4482 | 0 |
| 1286 | 233.1 | 0.9641 | 0.3317 | 9.3921 | 3.5613 | 0.0000 | 2.3648 | 0.0000 | 3.5483 | 0.0000 | 2.3967 | 0.0000 | 1.7966    | 0.0000 | 2.8054 | 0.0000 | 3.8649 | 0.0000 | 1.4482 | 0 |
| 1287 | 232.9 | 0.9634 | 0.3319 | 9.3999 | 3.5612 | 0.0000 | 2.3647 | 0.0000 | 3.5483 | 0.0000 | 2.3966 | 0.0000 | 1.7966    | 0.0000 | 2.8053 | 0.0000 | 3.8647 | 0.0000 | 1.4482 | 0 |

| nm   | THz   | eV     | Ag     |        | cSi    |        | Fe2O3  |        | GaAs   |        | TiO2   |        | P3HT:PCBM |        | CdTe   |        | aSi    |        | SiO2   |   |
|------|-------|--------|--------|--------|--------|--------|--------|--------|--------|--------|--------|--------|-----------|--------|--------|--------|--------|--------|--------|---|
|      |       |        | n      | k      | n      | k      | n      | k      | n      | k      | n      | k      | n         | k      | n      | k      | n      | k      | n      | k |
| 1288 | 232.8 | 0.9626 | 0.3321 | 9.4078 | 3.5610 | 0.0000 | 2.3647 | 0.0000 | 3.5482 | 0.0000 | 2.3966 | 0.0000 | 1.7965    | 0.0000 | 2.8053 | 0.0000 | 3.8645 | 0.0000 | 1.4482 | 0 |
| 1289 | 232.6 | 0.9619 | 0.3323 | 9.4157 | 3.5609 | 0.0000 | 2.3646 | 0.0000 | 3.5481 | 0.0000 | 2.3965 | 0.0000 | 1.7965    | 0.0000 | 2.8053 | 0.0000 | 3.8643 | 0.0000 | 1.4482 | 0 |
| 1290 | 232.4 | 0.9611 | 0.3325 | 9.4236 | 3.5607 | 0.0000 | 2.3645 | 0.0000 | 3.5481 | 0.0000 | 2.3965 | 0.0000 | 1.7964    | 0.0000 | 2.8053 | 0.0000 | 3.8641 | 0.0000 | 1.4482 | 0 |
| 1291 | 232.2 | 0.9604 | 0.3327 | 9.4315 | 3.5606 | 0.0000 | 2.3645 | 0.0000 | 3.5480 | 0.0000 | 2.3964 | 0.0000 | 1.7964    | 0.0000 | 2.8053 | 0.0000 | 3.8639 | 0.0000 | 1.4482 | 0 |
| 1292 | 232   | 0.9596 | 0.3328 | 9.4393 | 3.5605 | 0.0000 | 2.3644 | 0.0000 | 3.5479 | 0.0000 | 2.3964 | 0.0000 | 1.7963    | 0.0000 | 2.8052 | 0.0000 | 3.8637 | 0.0000 | 1.4482 | 0 |
| 1293 | 231.9 | 0.9589 | 0.3330 | 9.4472 | 3.5603 | 0.0000 | 2.3643 | 0.0000 | 3.5478 | 0.0000 | 2.3964 | 0.0000 | 1.7963    | 0.0000 | 2.8052 | 0.0000 | 3.8635 | 0.0000 | 1.4482 | 0 |
| 1294 | 231.7 | 0.9581 | 0.3332 | 9.4551 | 3.5602 | 0.0000 | 2.3642 | 0.0000 | 3.5478 | 0.0000 | 2.3963 | 0.0000 | 1.7962    | 0.0000 | 2.8052 | 0.0000 | 3.8633 | 0.0000 | 1.4482 | 0 |
| 1295 | 231.5 | 0.9574 | 0.3334 | 9.4630 | 3.5601 | 0.0000 | 2.3642 | 0.0000 | 3.5477 | 0.0000 | 2.3963 | 0.0000 | 1.7962    | 0.0000 | 2.8052 | 0.0000 | 3.8631 | 0.0000 | 1.4482 | 0 |
| 1296 | 231.3 | 0.9567 | 0.3336 | 9.4709 | 3.5599 | 0.0000 | 2.3641 | 0.0000 | 3.5476 | 0.0000 | 2.3962 | 0.0000 | 1.7961    | 0.0000 | 2.8051 | 0.0000 | 3.8629 | 0.0000 | 1.4482 | 0 |
| 1297 | 231.1 | 0.9559 | 0.3338 | 9.4787 | 3.5598 | 0.0000 | 2.3640 | 0.0000 | 3.5476 | 0.0000 | 2.3962 | 0.0000 | 1.7961    | 0.0000 | 2.8051 | 0.0000 | 3.8627 | 0.0000 | 1.4482 | 0 |
| 1298 | 231   | 0.9552 | 0.3340 | 9.4866 | 3.5597 | 0.0000 | 2.3640 | 0.0000 | 3.5475 | 0.0000 | 2.3962 | 0.0000 | 1.7960    | 0.0000 | 2.8051 | 0.0000 | 3.8625 | 0.0000 | 1.4481 | 0 |
| 1299 | 230.8 | 0.9545 | 0.3342 | 9.4945 | 3.5595 | 0.0000 | 2.3639 | 0.0000 | 3.5474 | 0.0000 | 2.3961 | 0.0000 | 1.7960    | 0.0000 | 2.8051 | 0.0000 | 3.8623 | 0.0000 | 1.4481 | 0 |
| 1300 | 230.6 | 0.9537 | 0.3344 | 9.5024 | 3.5594 | 0.0000 | 2.3638 | 0.0000 | 3.5473 | 0.0000 | 2.3961 | 0.0000 | 1.7959    | 0.0000 | 2.8051 | 0.0000 | 3.8621 | 0.0000 | 1.4481 | 0 |
| 1301 | 230.4 | 0.9530 | 0.3346 | 9.5103 | 3.5592 | 0.0000 | 2.3637 | 0.0000 | 3.5473 | 0.0000 | 2.3960 | 0.0000 | 1.7959    | 0.0000 | 2.8051 | 0.0000 | 3.8619 | 0.0000 | 1.4481 | 0 |
| 1302 | 230.3 | 0.9523 | 0.3348 | 9.5182 | 3.5591 | 0.0000 | 2.3637 | 0.0000 | 3.5472 | 0.0000 | 2.3960 | 0.0000 | 1.7958    | 0.0000 | 2.8050 | 0.0000 | 3.8617 | 0.0000 | 1.4481 | 0 |
| 1303 | 230.1 | 0.9515 | 0.3350 | 9.5260 | 3.5590 | 0.0000 | 2.3636 | 0.0000 | 3.5471 | 0.0000 | 2.3960 | 0.0000 | 1.7958    | 0.0000 | 2.8050 | 0.0000 | 3.8616 | 0.0000 | 1.4481 | 0 |
| 1304 | 229.9 | 0.9508 | 0.3351 | 9.5339 | 3.5588 | 0.0000 | 2.3635 | 0.0000 | 3.5471 | 0.0000 | 2.3959 | 0.0000 | 1.7957    | 0.0000 | 2.8050 | 0.0000 | 3.8614 | 0.0000 | 1.4481 | 0 |
| 1305 | 229.7 | 0.9501 | 0.3353 | 9.5418 | 3.5587 | 0.0000 | 2.3635 | 0.0000 | 3.5470 | 0.0000 | 2.3959 | 0.0000 | 1.7957    | 0.0000 | 2.8050 | 0.0000 | 3.8612 | 0.0000 | 1.4481 | 0 |
| 1306 | 229.6 | 0.9493 | 0.3355 | 9.5497 | 3.5586 | 0.0000 | 2.3634 | 0.0000 | 3.5469 | 0.0000 | 2.3958 | 0.0000 | 1.7956    | 0.0000 | 2.8050 | 0.0000 | 3.8610 | 0.0000 | 1.4481 | 0 |
| 1307 | 229.4 | 0.9486 | 0.3357 | 9.5576 | 3.5584 | 0.0000 | 2.3633 | 0.0000 | 3.5469 | 0.0000 | 2.3958 | 0.0000 | 1.7956    | 0.0000 | 2.8050 | 0.0000 | 3.8608 | 0.0000 | 1.4481 | 0 |
| 1308 | 229.2 | 0.9479 | 0.3359 | 9.5655 | 3.5583 | 0.0000 | 2.3633 | 0.0000 | 3.5468 | 0.0000 | 2.3958 | 0.0000 | 1.7955    | 0.0000 | 2.8049 | 0.0000 | 3.8606 | 0.0000 | 1.4481 | 0 |
| 1309 | 229   | 0.9472 | 0.3361 | 9.5734 | 3.5582 | 0.0000 | 2.3632 | 0.0000 | 3.5467 | 0.0000 | 2.3957 | 0.0000 | 1.7955    | 0.0000 | 2.8049 | 0.0000 | 3.8604 | 0.0000 | 1.4481 | 0 |
| 1310 | 228.8 | 0.9464 | 0.3363 | 9.5813 | 3.5581 | 0.0000 | 2.3631 | 0.0000 | 3.5467 | 0.0000 | 2.3957 | 0.0000 | 1.7954    | 0.0000 | 2.8049 | 0.0000 | 3.8602 | 0.0000 | 1.4481 | 0 |
| 1311 | 228.7 | 0.9457 | 0.3365 | 9.5891 | 3.5579 | 0.0000 | 2.3631 | 0.0000 | 3.5466 | 0.0000 | 2.3956 | 0.0000 | 1.7954    | 0.0000 | 2.8049 | 0.0000 | 3.8601 | 0.0000 | 1.4481 | 0 |
| 1312 | 228.5 | 0.9450 | 0.3367 | 9.5970 | 3.5578 | 0.0000 | 2.3630 | 0.0000 | 3.5465 | 0.0000 | 2.3956 | 0.0000 | 1.7953    | 0.0000 | 2.8049 | 0.0000 | 3.8599 | 0.0000 | 1.4481 | 0 |
| 1313 | 228.3 | 0.9443 | 0.3369 | 9.6049 | 3.5577 | 0.0000 | 2.3629 | 0.0000 | 3.5465 | 0.0000 | 2.3956 | 0.0000 | 1.7953    | 0.0000 | 2.8049 | 0.0000 | 3.8597 | 0.0000 | 1.4481 | 0 |
| 1314 | 228.2 | 0.9436 | 0.3371 | 9.6128 | 3.5575 | 0.0000 | 2.3629 | 0.0000 | 3.5464 | 0.0000 | 2.3955 | 0.0000 | 1.7952    | 0.0000 | 2.8048 | 0.0000 | 3.8595 | 0.0000 | 1.4481 | 0 |
| 1315 | 228   | 0.9428 | 0.3373 | 9.6207 | 3.5574 | 0.0000 | 2.3628 | 0.0000 | 3.5463 | 0.0000 | 2.3955 | 0.0000 | 1.7952    | 0.0000 | 2.8048 | 0.0000 | 3.8593 | 0.0000 | 1.4481 | 0 |
| 1316 | 227.8 | 0.9421 | 0.3375 | 9.6286 | 3.5573 | 0.0000 | 2.3627 | 0.0000 | 3.5463 | 0.0000 | 2.3954 | 0.0000 | 1.7951    | 0.0000 | 2.8048 | 0.0000 | 3.8591 | 0.0000 | 1.4481 | 0 |
| 1317 | 227.6 | 0.9414 | 0.3377 | 9.6365 | 3.5571 | 0.0000 | 2.3627 | 0.0000 | 3.5462 | 0.0000 | 2.3954 | 0.0000 | 1.7951    | 0.0000 | 2.8048 | 0.0000 | 3.8589 | 0.0000 | 1.4481 | 0 |
| 1318 | 227.5 | 0.9407 | 0.3379 | 9.6444 | 3.5570 | 0.0000 | 2.3626 | 0.0000 | 3.5461 | 0.0000 | 2.3954 | 0.0000 | 1.7950    | 0.0000 | 2.8048 | 0.0000 | 3.8588 | 0.0000 | 1.4481 | 0 |
| 1319 | 227.3 | 0.9400 | 0.3381 | 9.6523 | 3.5569 | 0.0000 | 2.3625 | 0.0000 | 3.5461 | 0.0000 | 2.3953 | 0.0000 | 1.7950    | 0.0000 | 2.8048 | 0.0000 | 3.8586 | 0.0000 | 1.4481 | 0 |

| nm   | THz   | eV     | Ag     |        | cSi    |        | Fe2O3  |        | GaAs   |        | TiO2   |        | P3HT:PCBM |        | CdTe   |        | aSi    |        | SiO2   |   |
|------|-------|--------|--------|--------|--------|--------|--------|--------|--------|--------|--------|--------|-----------|--------|--------|--------|--------|--------|--------|---|
|      |       |        | n      | k      | n      | k      | n      | k      | n      | k      | n      | k      | n         | k      | n      | k      | n      | k      | n      | k |
| 1320 | 227.1 | 0.9393 | 0.3382 | 9.6602 | 3.5568 | 0.0000 | 2.3625 | 0.0000 | 3.5460 | 0.0000 | 2.3953 | 0.0000 | 1.7949    | 0.0000 | 2.8048 | 0.0000 | 3.8584 | 0.0000 | 1.4481 | 0 |
| 1321 | 226.9 | 0.9386 | 0.3384 | 9.6681 | 3.5566 | 0.0000 | 2.3624 | 0.0000 | 3.5459 | 0.0000 | 2.3953 | 0.0000 | 1.7949    | 0.0000 | 2.8047 | 0.0000 | 3.8582 | 0.0000 | 1.4481 | 0 |
| 1322 | 226.8 | 0.9379 | 0.3386 | 9.6760 | 3.5565 | 0.0000 | 2.3623 | 0.0000 | 3.5459 | 0.0000 | 2.3952 | 0.0000 | 1.7948    | 0.0000 | 2.8047 | 0.0000 | 3.8580 | 0.0000 | 1.4481 | 0 |
| 1323 | 226.6 | 0.9371 | 0.3388 | 9.6838 | 3.5564 | 0.0000 | 2.3623 | 0.0000 | 3.5458 | 0.0000 | 2.3952 | 0.0000 | 1.7948    | 0.0000 | 2.8047 | 0.0000 | 3.8579 | 0.0000 | 1.4481 | 0 |
| 1324 | 226.4 | 0.9364 | 0.3390 | 9.6917 | 3.5562 | 0.0000 | 2.3622 | 0.0000 | 3.5457 | 0.0000 | 2.3951 | 0.0000 | 1.7947    | 0.0000 | 2.8047 | 0.0000 | 3.8577 | 0.0000 | 1.4481 | 0 |
| 1325 | 226.3 | 0.9357 | 0.3392 | 9.6996 | 3.5561 | 0.0000 | 2.3621 | 0.0000 | 3.5457 | 0.0000 | 2.3951 | 0.0000 | 1.7947    | 0.0000 | 2.8047 | 0.0000 | 3.8575 | 0.0000 | 1.4481 | 0 |
| 1326 | 226.1 | 0.9350 | 0.3394 | 9.7075 | 3.5560 | 0.0000 | 2.3621 | 0.0000 | 3.5456 | 0.0000 | 2.3951 | 0.0000 | 1.7946    | 0.0000 | 2.8047 | 0.0000 | 3.8573 | 0.0000 | 1.4481 | 0 |
| 1327 | 225.9 | 0.9343 | 0.3396 | 9.7154 | 3.5559 | 0.0000 | 2.3620 | 0.0000 | 3.5455 | 0.0000 | 2.3950 | 0.0000 | 1.7946    | 0.0000 | 2.8047 | 0.0000 | 3.8572 | 0.0000 | 1.4481 | 0 |
| 1328 | 225.7 | 0.9336 | 0.3398 | 9.7233 | 3.5557 | 0.0000 | 2.3619 | 0.0000 | 3.5455 | 0.0000 | 2.3950 | 0.0000 | 1.7945    | 0.0000 | 2.8047 | 0.0000 | 3.8570 | 0.0000 | 1.4481 | 0 |
| 1329 | 225.6 | 0.9329 | 0.3400 | 9.7312 | 3.5556 | 0.0000 | 2.3619 | 0.0000 | 3.5454 | 0.0000 | 2.3949 | 0.0000 | 1.7945    | 0.0000 | 2.8046 | 0.0000 | 3.8568 | 0.0000 | 1.4481 | 0 |
| 1330 | 225.4 | 0.9322 | 0.3402 | 9.7391 | 3.5555 | 0.0000 | 2.3618 | 0.0000 | 3.5454 | 0.0000 | 2.3949 | 0.0000 | 1.7944    | 0.0000 | 2.8046 | 0.0000 | 3.8566 | 0.0000 | 1.4481 | 0 |
| 1331 | 225.2 | 0.9315 | 0.3404 | 9.7470 | 3.5554 | 0.0000 | 2.3617 | 0.0000 | 3.5453 | 0.0000 | 2.3949 | 0.0000 | 1.7944    | 0.0000 | 2.8046 | 0.0000 | 3.8564 | 0.0000 | 1.4481 | 0 |
| 1332 | 225.1 | 0.9308 | 0.3406 | 9.7549 | 3.5552 | 0.0000 | 2.3617 | 0.0000 | 3.5452 | 0.0000 | 2.3948 | 0.0000 | 1.7944    | 0.0000 | 2.8046 | 0.0000 | 3.8563 | 0.0000 | 1.4481 | 0 |
| 1333 | 224.9 | 0.9301 | 0.3408 | 9.7628 | 3.5551 | 0.0000 | 2.3616 | 0.0000 | 3.5452 | 0.0000 | 2.3948 | 0.0000 | 1.7943    | 0.0000 | 2.8046 | 0.0000 | 3.8561 | 0.0000 | 1.4480 | 0 |
| 1334 | 224.7 | 0.9294 | 0.3410 | 9.7707 | 3.5550 | 0.0000 | 2.3616 | 0.0000 | 3.5451 | 0.0000 | 2.3948 | 0.0000 | 1.7943    | 0.0000 | 2.8046 | 0.0000 | 3.8559 | 0.0000 | 1.4480 | 0 |
| 1335 | 224.6 | 0.9287 | 0.3412 | 9.7786 | 3.5549 | 0.0000 | 2.3615 | 0.0000 | 3.5450 | 0.0000 | 2.3947 | 0.0000 | 1.7942    | 0.0000 | 2.8046 | 0.0000 | 3.8558 | 0.0000 | 1.4480 | 0 |
| 1336 | 224.4 | 0.9280 | 0.3414 | 9.7865 | 3.5547 | 0.0000 | 2.3614 | 0.0000 | 3.5450 | 0.0000 | 2.3947 | 0.0000 | 1.7942    | 0.0000 | 2.8046 | 0.0000 | 3.8556 | 0.0000 | 1.4480 | 0 |
| 1337 | 224.2 | 0.9273 | 0.3416 | 9.7944 | 3.5546 | 0.0000 | 2.3614 | 0.0000 | 3.5449 | 0.0000 | 2.3946 | 0.0000 | 1.7941    | 0.0000 | 2.8046 | 0.0000 | 3.8554 | 0.0000 | 1.4480 | 0 |
| 1338 | 224.1 | 0.9266 | 0.3418 | 9.8023 | 3.5545 | 0.0000 | 2.3613 | 0.0000 | 3.5449 | 0.0000 | 2.3946 | 0.0000 | 1.7941    | 0.0000 | 2.8046 | 0.0000 | 3.8552 | 0.0000 | 1.4480 | 0 |
| 1339 | 223.9 | 0.9259 | 0.3420 | 9.8102 | 3.5544 | 0.0000 | 2.3612 | 0.0000 | 3.5448 | 0.0000 | 2.3946 | 0.0000 | 1.7940    | 0.0000 | 2.8045 | 0.0000 | 3.8551 | 0.0000 | 1.4480 | 0 |
| 1340 | 223.7 | 0.9253 | 0.3422 | 9.8181 | 3.5543 | 0.0000 | 2.3612 | 0.0000 | 3.5447 | 0.0000 | 2.3945 | 0.0000 | 1.7940    | 0.0000 | 2.8045 | 0.0000 | 3.8549 | 0.0000 | 1.4480 | 0 |
| 1341 | 223.6 | 0.9246 | 0.3424 | 9.8261 | 3.5541 | 0.0000 | 2.3611 | 0.0000 | 3.5447 | 0.0000 | 2.3945 | 0.0000 | 1.7939    | 0.0000 | 2.8045 | 0.0000 | 3.8547 | 0.0000 | 1.4480 | 0 |
| 1342 | 223.4 | 0.9239 | 0.3426 | 9.8340 | 3.5540 | 0.0000 | 2.3611 | 0.0000 | 3.5446 | 0.0000 | 2.3945 | 0.0000 | 1.7939    | 0.0000 | 2.8045 | 0.0000 | 3.8546 | 0.0000 | 1.4480 | 0 |
| 1343 | 223.2 | 0.9232 | 0.3428 | 9.8419 | 3.5539 | 0.0000 | 2.3610 | 0.0000 | 3.5446 | 0.0000 | 2.3944 | 0.0000 | 1.7939    | 0.0000 | 2.8045 | 0.0000 | 3.8544 | 0.0000 | 1.4480 | 0 |
| 1344 | 223.1 | 0.9225 | 0.3430 | 9.8498 | 3.5538 | 0.0000 | 2.3609 | 0.0000 | 3.5445 | 0.0000 | 2.3944 | 0.0000 | 1.7938    | 0.0000 | 2.8045 | 0.0000 | 3.8542 | 0.0000 | 1.4480 | 0 |
| 1345 | 222.9 | 0.9218 | 0.3432 | 9.8577 | 3.5536 | 0.0000 | 2.3609 | 0.0000 | 3.5444 | 0.0000 | 2.3944 | 0.0000 | 1.7938    | 0.0000 | 2.8045 | 0.0000 | 3.8540 | 0.0000 | 1.4480 | 0 |
| 1346 | 222.7 | 0.9211 | 0.3434 | 9.8656 | 3.5535 | 0.0000 | 2.3608 | 0.0000 | 3.5444 | 0.0000 | 2.3943 | 0.0000 | 1.7937    | 0.0000 | 2.8045 | 0.0000 | 3.8539 | 0.0000 | 1.4480 | 0 |
| 1347 | 222.6 | 0.9204 | 0.3436 | 9.8735 | 3.5534 | 0.0000 | 2.3608 | 0.0000 | 3.5443 | 0.0000 | 2.3943 | 0.0000 | 1.7937    | 0.0000 | 2.8045 | 0.0000 | 3.8537 | 0.0000 | 1.4480 | 0 |
| 1348 | 222.4 | 0.9198 | 0.3438 | 9.8814 | 3.5533 | 0.0000 | 2.3607 | 0.0000 | 3.5442 | 0.0000 | 2.3942 | 0.0000 | 1.7936    | 0.0000 | 2.8045 | 0.0000 | 3.8535 | 0.0000 | 1.4480 | 0 |
| 1349 | 222.2 | 0.9191 | 0.3440 | 9.8893 | 3.5532 | 0.0000 | 2.3606 | 0.0000 | 3.5442 | 0.0000 | 2.3942 | 0.0000 | 1.7936    | 0.0000 | 2.8045 | 0.0000 | 3.8534 | 0.0000 | 1.4480 | 0 |
| 1350 | 222.1 | 0.9184 | 0.3442 | 9.8972 | 3.5530 | 0.0000 | 2.3606 | 0.0000 | 3.5441 | 0.0000 | 2.3942 | 0.0000 | 1.7935    | 0.0000 | 2.8045 | 0.0000 | 3.8532 | 0.0000 | 1.4480 | 0 |
| 1351 | 221.9 | 0.9177 | 0.3444 | 9.9051 | 3.5529 | 0.0000 | 2.3605 | 0.0000 | 3.5441 | 0.0000 | 2.3941 | 0.0000 | 1.7935    | 0.0000 | 2.8045 | 0.0000 | 3.8530 | 0.0000 | 1.4480 | 0 |

| nm   | THz   | eV     | Ag     |         | cSi    |        | Fe2O3  |        | GaAs   |        | TiO2   |        | P3HT:PCBM |        | CdTe   |        | aSi    |        | SiO2   |   |
|------|-------|--------|--------|---------|--------|--------|--------|--------|--------|--------|--------|--------|-----------|--------|--------|--------|--------|--------|--------|---|
|      |       |        | n      | k       | n      | k      | n      | k      | n      | k      | n      | k      | n         | k      | n      | k      | n      | k      | n      | k |
| 1352 | 221.7 | 0.9170 | 0.3446 | 9.9130  | 3.5528 | 0.0000 | 2.3605 | 0.0000 | 3.5440 | 0.0000 | 2.3941 | 0.0000 | 1.7935    | 0.0000 | 2.8045 | 0.0000 | 3.8529 | 0.0000 | 1.4480 | 0 |
| 1353 | 221.6 | 0.9164 | 0.3448 | 9.9210  | 3.5527 | 0.0000 | 2.3604 | 0.0000 | 3.5440 | 0.0000 | 2.3941 | 0.0000 | 1.7934    | 0.0000 | 2.8045 | 0.0000 | 3.8527 | 0.0000 | 1.4480 | 0 |
| 1354 | 221.4 | 0.9157 | 0.3450 | 9.9289  | 3.5526 | 0.0000 | 2.3603 | 0.0000 | 3.5439 | 0.0000 | 2.3940 | 0.0000 | 1.7934    | 0.0000 | 2.8044 | 0.0000 | 3.8526 | 0.0000 | 1.4480 | 0 |
| 1355 | 221.2 | 0.9150 | 0.3452 | 9.9368  | 3.5525 | 0.0000 | 2.3603 | 0.0000 | 3.5438 | 0.0000 | 2.3940 | 0.0000 | 1.7933    | 0.0000 | 2.8044 | 0.0000 | 3.8524 | 0.0000 | 1.4480 | 0 |
| 1356 | 221.1 | 0.9143 | 0.3454 | 9.9447  | 3.5523 | 0.0000 | 2.3602 | 0.0000 | 3.5438 | 0.0000 | 2.3940 | 0.0000 | 1.7933    | 0.0000 | 2.8044 | 0.0000 | 3.8522 | 0.0000 | 1.4480 | 0 |
| 1357 | 220.9 | 0.9137 | 0.3456 | 9.9526  | 3.5522 | 0.0000 | 2.3602 | 0.0000 | 3.5437 | 0.0000 | 2.3939 | 0.0000 | 1.7932    | 0.0000 | 2.8044 | 0.0000 | 3.8521 | 0.0000 | 1.4480 | 0 |
| 1358 | 220.8 | 0.9130 | 0.3458 | 9.9605  | 3.5521 | 0.0000 | 2.3601 | 0.0000 | 3.5437 | 0.0000 | 2.3939 | 0.0000 | 1.7932    | 0.0000 | 2.8044 | 0.0000 | 3.8519 | 0.0000 | 1.4480 | 0 |
| 1359 | 220.6 | 0.9123 | 0.3460 | 9.9684  | 3.5520 | 0.0000 | 2.3600 | 0.0000 | 3.5436 | 0.0000 | 2.3939 | 0.0000 | 1.7932    | 0.0000 | 2.8044 | 0.0000 | 3.8517 | 0.0000 | 1.4480 | 0 |
| 1360 | 220.4 | 0.9116 | 0.3462 | 9.9764  | 3.5519 | 0.0000 | 2.3600 | 0.0000 | 3.5435 | 0.0000 | 2.3938 | 0.0000 | 1.7931    | 0.0000 | 2.8044 | 0.0000 | 3.8516 | 0.0000 | 1.4480 | 0 |
| 1361 | 220.3 | 0.9110 | 0.3464 | 9.9843  | 3.5518 | 0.0000 | 2.3599 | 0.0000 | 3.5435 | 0.0000 | 2.3938 | 0.0000 | 1.7931    | 0.0000 | 2.8044 | 0.0000 | 3.8514 | 0.0000 | 1.4480 | 0 |
| 1362 | 220.1 | 0.9103 | 0.3466 | 9.9922  | 3.5516 | 0.0000 | 2.3599 | 0.0000 | 3.5434 | 0.0000 | 2.3938 | 0.0000 | 1.7930    | 0.0000 | 2.8044 | 0.0000 | 3.8513 | 0.0000 | 1.4480 | 0 |
| 1363 | 220   | 0.9096 | 0.3468 | 10.0001 | 3.5515 | 0.0000 | 2.3598 | 0.0000 | 3.5434 | 0.0000 | 2.3937 | 0.0000 | 1.7930    | 0.0000 | 2.8044 | 0.0000 | 3.8511 | 0.0000 | 1.4480 | 0 |
| 1364 | 219.8 | 0.9090 | 0.3470 | 10.0080 | 3.5514 | 0.0000 | 2.3597 | 0.0000 | 3.5433 | 0.0000 | 2.3937 | 0.0000 | 1.7929    | 0.0000 | 2.8044 | 0.0000 | 3.8509 | 0.0000 | 1.4480 | 0 |
| 1365 | 219.6 | 0.9083 | 0.3472 | 10.0159 | 3.5513 | 0.0000 | 2.3597 | 0.0000 | 3.5433 | 0.0000 | 2.3936 | 0.0000 | 1.7929    | 0.0000 | 2.8044 | 0.0000 | 3.8508 | 0.0000 | 1.4480 | 0 |
| 1366 | 219.5 | 0.9076 | 0.3474 | 10.0239 | 3.5512 | 0.0000 | 2.3596 | 0.0000 | 3.5432 | 0.0000 | 2.3936 | 0.0000 | 1.7929    | 0.0000 | 2.8044 | 0.0000 | 3.8506 | 0.0000 | 1.4480 | 0 |
| 1367 | 219.3 | 0.9070 | 0.3476 | 10.0318 | 3.5511 | 0.0000 | 2.3596 | 0.0000 | 3.5431 | 0.0000 | 2.3936 | 0.0000 | 1.7928    | 0.0000 | 2.8044 | 0.0000 | 3.8505 | 0.0000 | 1.4480 | 0 |
| 1368 | 219.1 | 0.9063 | 0.3478 | 10.0397 | 3.5509 | 0.0000 | 2.3595 | 0.0000 | 3.5431 | 0.0000 | 2.3935 | 0.0000 | 1.7928    | 0.0000 | 2.8044 | 0.0000 | 3.8503 | 0.0000 | 1.4480 | 0 |
| 1369 | 219   | 0.9057 | 0.3480 | 10.0476 | 3.5508 | 0.0000 | 2.3595 | 0.0000 | 3.5430 | 0.0000 | 2.3935 | 0.0000 | 1.7927    | 0.0000 | 2.8044 | 0.0000 | 3.8501 | 0.0000 | 1.4480 | 0 |
| 1370 | 218.8 | 0.9050 | 0.3482 | 10.0555 | 3.5507 | 0.0000 | 2.3594 | 0.0000 | 3.5430 | 0.0000 | 2.3935 | 0.0000 | 1.7927    | 0.0000 | 2.8044 | 0.0000 | 3.8500 | 0.0000 | 1.4479 | 0 |
| 1371 | 218.7 | 0.9043 | 0.3484 | 10.0635 | 3.5506 | 0.0000 | 2.3593 | 0.0000 | 3.5429 | 0.0000 | 2.3934 | 0.0000 | 1.7926    | 0.0000 | 2.8044 | 0.0000 | 3.8498 | 0.0000 | 1.4479 | 0 |
| 1372 | 218.5 | 0.9037 | 0.3486 | 10.0714 | 3.5505 | 0.0000 | 2.3593 | 0.0000 | 3.5429 | 0.0000 | 2.3934 | 0.0000 | 1.7926    | 0.0000 | 2.8044 | 0.0000 | 3.8497 | 0.0000 | 1.4479 | 0 |
| 1373 | 218.3 | 0.9030 | 0.3488 | 10.0793 | 3.5504 | 0.0000 | 2.3592 | 0.0000 | 3.5428 | 0.0000 | 2.3934 | 0.0000 | 1.7926    | 0.0000 | 2.8044 | 0.0000 | 3.8495 | 0.0000 | 1.4479 | 0 |
| 1374 | 218.2 | 0.9024 | 0.3490 | 10.0872 | 3.5503 | 0.0000 | 2.3592 | 0.0000 | 3.5427 | 0.0000 | 2.3933 | 0.0000 | 1.7925    | 0.0000 | 2.8044 | 0.0000 | 3.8494 | 0.0000 | 1.4479 | 0 |
| 1375 | 218   | 0.9017 | 0.3492 | 10.0952 | 3.5502 | 0.0000 | 2.3591 | 0.0000 | 3.5427 | 0.0000 | 2.3933 | 0.0000 | 1.7925    | 0.0000 | 2.8044 | 0.0000 | 3.8492 | 0.0000 | 1.4479 | 0 |
| 1376 | 217.9 | 0.9010 | 0.3494 | 10.1031 | 3.5500 | 0.0000 | 2.3591 | 0.0000 | 3.5426 | 0.0000 | 2.3933 | 0.0000 | 1.7924    | 0.0000 | 2.8044 | 0.0000 | 3.8491 | 0.0000 | 1.4479 | 0 |
| 1377 | 217.7 | 0.9004 | 0.3496 | 10.1110 | 3.5499 | 0.0000 | 2.3590 | 0.0000 | 3.5426 | 0.0000 | 2.3932 | 0.0000 | 1.7924    | 0.0000 | 2.8044 | 0.0000 | 3.8489 | 0.0000 | 1.4479 | 0 |
| 1378 | 217.6 | 0.8997 | 0.3498 | 10.1189 | 3.5498 | 0.0000 | 2.3590 | 0.0000 | 3.5425 | 0.0000 | 2.3932 | 0.0000 | 1.7924    | 0.0000 | 2.8044 | 0.0000 | 3.8488 | 0.0000 | 1.4479 | 0 |
| 1379 | 217.4 | 0.8991 | 0.3500 | 10.1269 | 3.5497 | 0.0000 | 2.3589 | 0.0000 | 3.5425 | 0.0000 | 2.3932 | 0.0000 | 1.7923    | 0.0000 | 2.8044 | 0.0000 | 3.8486 | 0.0000 | 1.4479 | 0 |
| 1380 | 217.2 | 0.8984 | 0.3502 | 10.1348 | 3.5496 | 0.0000 | 2.3588 | 0.0000 | 3.5424 | 0.0000 | 2.3931 | 0.0000 | 1.7923    | 0.0000 | 2.8044 | 0.0000 | 3.8484 | 0.0000 | 1.4479 | 0 |
| 1381 | 217.1 | 0.8978 | 0.3504 | 10.1427 | 3.5495 | 0.0000 | 2.3588 | 0.0000 | 3.5424 | 0.0000 | 2.3931 | 0.0000 | 1.7922    | 0.0000 | 2.8044 | 0.0000 | 3.8483 | 0.0000 | 1.4479 | 0 |
| 1382 | 216.9 | 0.8971 | 0.3506 | 10.1506 | 3.5494 | 0.0000 | 2.3587 | 0.0000 | 3.5423 | 0.0000 | 2.3931 | 0.0000 | 1.7922    | 0.0000 | 2.8044 | 0.0000 | 3.8481 | 0.0000 | 1.4479 | 0 |
| 1383 | 216.8 | 0.8965 | 0.3508 | 10.1586 | 3.5493 | 0.0000 | 2.3587 | 0.0000 | 3.5423 | 0.0000 | 2.3930 | 0.0000 | 1.7922    | 0.0000 | 2.8044 | 0.0000 | 3.8480 | 0.0000 | 1.4479 | 0 |

| nm   | THz   | eV     | Ag     |         | cSi    |        | Fe2O3  |        | GaAs   |        | TiO2   |        | P3HT:PCBM |        | CdTe   |        | aSi    |        | SiO2   |   |
|------|-------|--------|--------|---------|--------|--------|--------|--------|--------|--------|--------|--------|-----------|--------|--------|--------|--------|--------|--------|---|
|      |       |        | n      | k       | n      | k      | n      | k      | n      | k      | n      | k      | n         | k      | n      | k      | n      | k      | n      | k |
| 1384 | 216.6 | 0.8958 | 0.3510 | 10.1665 | 3.5492 | 0.0000 | 2.3586 | 0.0000 | 3.5422 | 0.0000 | 2.3930 | 0.0000 | 1.7921    | 0.0000 | 2.8044 | 0.0000 | 3.8478 | 0.0000 | 1.4479 | 0 |
| 1385 | 216.5 | 0.8952 | 0.3512 | 10.1744 | 3.5490 | 0.0000 | 2.3586 | 0.0000 | 3.5421 | 0.0000 | 2.3930 | 0.0000 | 1.7921    | 0.0000 | 2.8044 | 0.0000 | 3.8477 | 0.0000 | 1.4479 | 0 |
| 1386 | 216.3 | 0.8945 | 0.3514 | 10.1824 | 3.5489 | 0.0000 | 2.3585 | 0.0000 | 3.5421 | 0.0000 | 2.3929 | 0.0000 | 1.7920    | 0.0000 | 2.8044 | 0.0000 | 3.8475 | 0.0000 | 1.4479 | 0 |
| 1387 | 216.1 | 0.8939 | 0.3516 | 10.1903 | 3.5488 | 0.0000 | 2.3585 | 0.0000 | 3.5420 | 0.0000 | 2.3929 | 0.0000 | 1.7920    | 0.0000 | 2.8044 | 0.0000 | 3.8474 | 0.0000 | 1.4479 | 0 |
| 1388 | 216   | 0.8933 | 0.3518 | 10.1982 | 3.5487 | 0.0000 | 2.3584 | 0.0000 | 3.5420 | 0.0000 | 2.3929 | 0.0000 | 1.7920    | 0.0000 | 2.8044 | 0.0000 | 3.8472 | 0.0000 | 1.4479 | 0 |
| 1389 | 215.8 | 0.8926 | 0.3520 | 10.2062 | 3.5486 | 0.0000 | 2.3584 | 0.0000 | 3.5419 | 0.0000 | 2.3928 | 0.0000 | 1.7919    | 0.0000 | 2.8044 | 0.0000 | 3.8471 | 0.0000 | 1.4479 | 0 |
| 1390 | 215.7 | 0.8920 | 0.3522 | 10.2141 | 3.5485 | 0.0000 | 2.3583 | 0.0000 | 3.5419 | 0.0000 | 2.3928 | 0.0000 | 1.7919    | 0.0000 | 2.8044 | 0.0000 | 3.8469 | 0.0000 | 1.4479 | 0 |
| 1391 | 215.5 | 0.8913 | 0.3525 | 10.2220 | 3.5484 | 0.0000 | 2.3582 | 0.0000 | 3.5418 | 0.0000 | 2.3928 | 0.0000 | 1.7918    | 0.0000 | 2.8044 | 0.0000 | 3.8468 | 0.0000 | 1.4479 | 0 |
| 1392 | 215.4 | 0.8907 | 0.3527 | 10.2300 | 3.5483 | 0.0000 | 2.3582 | 0.0000 | 3.5418 | 0.0000 | 2.3927 | 0.0000 | 1.7918    | 0.0000 | 2.8044 | 0.0000 | 3.8466 | 0.0000 | 1.4479 | 0 |
| 1393 | 215.2 | 0.8901 | 0.3529 | 10.2379 | 3.5482 | 0.0000 | 2.3581 | 0.0000 | 3.5417 | 0.0000 | 2.3927 | 0.0000 | 1.7918    | 0.0000 | 2.8044 | 0.0000 | 3.8465 | 0.0000 | 1.4479 | 0 |
| 1394 | 215.1 | 0.8894 | 0.3531 | 10.2458 | 3.5481 | 0.0000 | 2.3581 | 0.0000 | 3.5417 | 0.0000 | 2.3927 | 0.0000 | 1.7917    | 0.0000 | 2.8044 | 0.0000 | 3.8464 | 0.0000 | 1.4479 | 0 |
| 1395 | 214.9 | 0.8888 | 0.3533 | 10.2538 | 3.5480 | 0.0000 | 2.3580 | 0.0000 | 3.5416 | 0.0000 | 2.3926 | 0.0000 | 1.7917    | 0.0000 | 2.8044 | 0.0000 | 3.8462 | 0.0000 | 1.4479 | 0 |
| 1396 | 214.8 | 0.8881 | 0.3535 | 10.2617 | 3.5479 | 0.0000 | 2.3580 | 0.0000 | 3.5416 | 0.0000 | 2.3926 | 0.0000 | 1.7917    | 0.0000 | 2.8044 | 0.0000 | 3.8461 | 0.0000 | 1.4479 | 0 |
| 1397 | 214.6 | 0.8875 | 0.3537 | 10.2696 | 3.5477 | 0.0000 | 2.3579 | 0.0000 | 3.5415 | 0.0000 | 2.3926 | 0.0000 | 1.7916    | 0.0000 | 2.8044 | 0.0000 | 3.8459 | 0.0000 | 1.4479 | 0 |
| 1398 | 214.4 | 0.8869 | 0.3539 | 10.2776 | 3.5476 | 0.0000 | 2.3579 | 0.0000 | 3.5415 | 0.0000 | 2.3925 | 0.0000 | 1.7916    | 0.0000 | 2.8044 | 0.0000 | 3.8458 | 0.0000 | 1.4479 | 0 |
| 1399 | 214.3 | 0.8862 | 0.3541 | 10.2855 | 3.5475 | 0.0000 | 2.3578 | 0.0000 | 3.5414 | 0.0000 | 2.3925 | 0.0000 | 1.7915    | 0.0000 | 2.8044 | 0.0000 | 3.8456 | 0.0000 | 1.4479 | 0 |
| 1400 | 214.1 | 0.8856 | 0.3543 | 10.2935 | 3.5474 | 0.0000 | 2.3578 | 0.0000 | 3.5414 | 0.0000 | 2.3925 | 0.0000 | 1.7915    | 0.0000 | 2.8045 | 0.0000 | 3.8455 | 0.0000 | 1.4479 | 0 |
| 1401 | 214   | 0.8850 | 0.3545 | 10.3014 | 3.5473 | 0.0000 | 2.3577 | 0.0000 | 3.5413 | 0.0000 | 2.3925 | 0.0000 | 1.7915    | 0.0000 | 2.8045 | 0.0000 | 3.8453 | 0.0000 | 1.4479 | 0 |
| 1402 | 213.8 | 0.8843 | 0.3547 | 10.3093 | 3.5472 | 0.0000 | 2.3577 | 0.0000 | 3.5413 | 0.0000 | 2.3924 | 0.0000 | 1.7914    | 0.0000 | 2.8045 | 0.0000 | 3.8452 | 0.0000 | 1.4479 | 0 |
| 1403 | 213.7 | 0.8837 | 0.3549 | 10.3173 | 3.5471 | 0.0000 | 2.3576 | 0.0000 | 3.5412 | 0.0000 | 2.3924 | 0.0000 | 1.7914    | 0.0000 | 2.8045 | 0.0000 | 3.8451 | 0.0000 | 1.4479 | 0 |
| 1404 | 213.5 | 0.8831 | 0.3551 | 10.3252 | 3.5470 | 0.0000 | 2.3576 | 0.0000 | 3.5411 | 0.0000 | 2.3924 | 0.0000 | 1.7913    | 0.0000 | 2.8045 | 0.0000 | 3.8449 | 0.0000 | 1.4479 | 0 |
| 1405 | 213.4 | 0.8824 | 0.3553 | 10.3332 | 3.5469 | 0.0000 | 2.3575 | 0.0000 | 3.5411 | 0.0000 | 2.3923 | 0.0000 | 1.7913    | 0.0000 | 2.8045 | 0.0000 | 3.8448 | 0.0000 | 1.4479 | 0 |
| 1406 | 213.2 | 0.8818 | 0.3556 | 10.3411 | 3.5468 | 0.0000 | 2.3575 | 0.0000 | 3.5410 | 0.0000 | 2.3923 | 0.0000 | 1.7913    | 0.0000 | 2.8045 | 0.0000 | 3.8446 | 0.0000 | 1.4479 | 0 |
| 1407 | 213.1 | 0.8812 | 0.3558 | 10.3491 | 3.5467 | 0.0000 | 2.3574 | 0.0000 | 3.5410 | 0.0000 | 2.3923 | 0.0000 | 1.7912    | 0.0000 | 2.8045 | 0.0000 | 3.8445 | 0.0000 | 1.4479 | 0 |
| 1408 | 212.9 | 0.8806 | 0.3560 | 10.3570 | 3.5466 | 0.0000 | 2.3574 | 0.0000 | 3.5409 | 0.0000 | 2.3922 | 0.0000 | 1.7912    | 0.0000 | 2.8045 | 0.0000 | 3.8443 | 0.0000 | 1.4479 | 0 |
| 1409 | 212.8 | 0.8799 | 0.3562 | 10.3649 | 3.5465 | 0.0000 | 2.3573 | 0.0000 | 3.5409 | 0.0000 | 2.3922 | 0.0000 | 1.7912    | 0.0000 | 2.8045 | 0.0000 | 3.8442 | 0.0000 | 1.4479 | 0 |
| 1410 | 212.6 | 0.8793 | 0.3564 | 10.3729 | 3.5464 | 0.0000 | 2.3573 | 0.0000 | 3.5408 | 0.0000 | 2.3922 | 0.0000 | 1.7911    | 0.0000 | 2.8045 | 0.0000 | 3.8441 | 0.0000 | 1.4479 | 0 |
| 1411 | 212.5 | 0.8787 | 0.3566 | 10.3808 | 3.5463 | 0.0000 | 2.3572 | 0.0000 | 3.5408 | 0.0000 | 2.3921 | 0.0000 | 1.7911    | 0.0000 | 2.8045 | 0.0000 | 3.8439 | 0.0000 | 1.4478 | 0 |
| 1412 | 212.3 | 0.8781 | 0.3568 | 10.3888 | 3.5462 | 0.0000 | 2.3572 | 0.0000 | 3.5407 | 0.0000 | 2.3921 | 0.0000 | 1.7910    | 0.0000 | 2.8045 | 0.0000 | 3.8438 | 0.0000 | 1.4478 | 0 |
| 1413 | 212.2 | 0.8775 | 0.3570 | 10.3967 | 3.5461 | 0.0000 | 2.3571 | 0.0000 | 3.5407 | 0.0000 | 2.3921 | 0.0000 | 1.7910    | 0.0000 | 2.8045 | 0.0000 | 3.8436 | 0.0000 | 1.4478 | 0 |
| 1414 | 212   | 0.8768 | 0.3572 | 10.4047 | 3.5460 | 0.0000 | 2.3571 | 0.0000 | 3.5406 | 0.0000 | 2.3920 | 0.0000 | 1.7910    | 0.0000 | 2.8045 | 0.0000 | 3.8435 | 0.0000 | 1.4478 | 0 |
| 1415 | 211.9 | 0.8762 | 0.3574 | 10.4126 | 3.5459 | 0.0000 | 2.3570 | 0.0000 | 3.5406 | 0.0000 | 2.3920 | 0.0000 | 1.7909    | 0.0000 | 2.8046 | 0.0000 | 3.8434 | 0.0000 | 1.4478 | 0 |

| nm   | THz   | eV     | Ag     |         | cSi    |        | Fe2O3  |        | GaAs   |        | TiO2   |        | P3HT:PCBM |        | CdTe   |        | aSi    |        | SiO2   |   |
|------|-------|--------|--------|---------|--------|--------|--------|--------|--------|--------|--------|--------|-----------|--------|--------|--------|--------|--------|--------|---|
|      |       |        | n      | k       | n      | k      | n      | k      | n      | k      | n      | k      | n         | k      | n      | k      | n      | k      | n      | k |
| 1416 | 211.7 | 0.8756 | 0.3576 | 10.4206 | 3.5458 | 0.0000 | 2.3570 | 0.0000 | 3.5405 | 0.0000 | 2.3920 | 0.0000 | 1.7909    | 0.0000 | 2.8046 | 0.0000 | 3.8432 | 0.0000 | 1.4478 | 0 |
| 1417 | 211.6 | 0.8750 | 0.3579 | 10.4285 | 3.5457 | 0.0000 | 2.3569 | 0.0000 | 3.5405 | 0.0000 | 2.3919 | 0.0000 | 1.7909    | 0.0000 | 2.8046 | 0.0000 | 3.8431 | 0.0000 | 1.4478 | 0 |
| 1418 | 211.4 | 0.8744 | 0.3581 | 10.4365 | 3.5456 | 0.0000 | 2.3569 | 0.0000 | 3.5404 | 0.0000 | 2.3919 | 0.0000 | 1.7908    | 0.0000 | 2.8046 | 0.0000 | 3.8430 | 0.0000 | 1.4478 | 0 |
| 1419 | 211.3 | 0.8737 | 0.3583 | 10.4444 | 3.5455 | 0.0000 | 2.3568 | 0.0000 | 3.5404 | 0.0000 | 2.3919 | 0.0000 | 1.7908    | 0.0000 | 2.8046 | 0.0000 | 3.8428 | 0.0000 | 1.4478 | 0 |
| 1420 | 211.1 | 0.8731 | 0.3585 | 10.4524 | 3.5454 | 0.0000 | 2.3568 | 0.0000 | 3.5404 | 0.0000 | 2.3919 | 0.0000 | 1.7908    | 0.0000 | 2.8046 | 0.0000 | 3.8427 | 0.0000 | 1.4478 | 0 |
| 1421 | 211   | 0.8725 | 0.3587 | 10.4603 | 3.5453 | 0.0000 | 2.3567 | 0.0000 | 3.5403 | 0.0000 | 2.3918 | 0.0000 | 1.7907    | 0.0000 | 2.8046 | 0.0000 | 3.8425 | 0.0000 | 1.4478 | 0 |
| 1422 | 210.8 | 0.8719 | 0.3589 | 10.4683 | 3.5452 | 0.0000 | 2.3567 | 0.0000 | 3.5403 | 0.0000 | 2.3918 | 0.0000 | 1.7907    | 0.0000 | 2.8046 | 0.0000 | 3.8424 | 0.0000 | 1.4478 | 0 |
| 1423 | 210.7 | 0.8713 | 0.3591 | 10.4762 | 3.5450 | 0.0000 | 2.3566 | 0.0000 | 3.5402 | 0.0000 | 2.3918 | 0.0000 | 1.7906    | 0.0000 | 2.8046 | 0.0000 | 3.8423 | 0.0000 | 1.4478 | 0 |
| 1424 | 210.5 | 0.8707 | 0.3593 | 10.4842 | 3.5449 | 0.0000 | 2.3566 | 0.0000 | 3.5402 | 0.0000 | 2.3917 | 0.0000 | 1.7906    | 0.0000 | 2.8046 | 0.0000 | 3.8421 | 0.0000 | 1.4478 | 0 |
| 1425 | 210.4 | 0.8701 | 0.3595 | 10.4922 | 3.5448 | 0.0000 | 2.3565 | 0.0000 | 3.5401 | 0.0000 | 2.3917 | 0.0000 | 1.7906    | 0.0000 | 2.8046 | 0.0000 | 3.8420 | 0.0000 | 1.4478 | 0 |
| 1426 | 210.2 | 0.8695 | 0.3597 | 10.5001 | 3.5447 | 0.0000 | 2.3565 | 0.0000 | 3.5401 | 0.0000 | 2.3917 | 0.0000 | 1.7905    | 0.0000 | 2.8047 | 0.0000 | 3.8419 | 0.0000 | 1.4478 | 0 |
| 1427 | 210.1 | 0.8688 | 0.3600 | 10.5081 | 3.5446 | 0.0000 | 2.3564 | 0.0000 | 3.5400 | 0.0000 | 2.3916 | 0.0000 | 1.7905    | 0.0000 | 2.8047 | 0.0000 | 3.8417 | 0.0000 | 1.4478 | 0 |
| 1428 | 209.9 | 0.8682 | 0.3602 | 10.5160 | 3.5445 | 0.0000 | 2.3564 | 0.0000 | 3.5400 | 0.0000 | 2.3916 | 0.0000 | 1.7905    | 0.0000 | 2.8047 | 0.0000 | 3.8416 | 0.0000 | 1.4478 | 0 |
| 1429 | 209.8 | 0.8676 | 0.3604 | 10.5240 | 3.5444 | 0.0000 | 2.3563 | 0.0000 | 3.5399 | 0.0000 | 2.3916 | 0.0000 | 1.7904    | 0.0000 | 2.8047 | 0.0000 | 3.8415 | 0.0000 | 1.4478 | 0 |
| 1430 | 209.6 | 0.8670 | 0.3606 | 10.5319 | 3.5444 | 0.0000 | 2.3563 | 0.0000 | 3.5399 | 0.0000 | 2.3916 | 0.0000 | 1.7904    | 0.0000 | 2.8047 | 0.0000 | 3.8413 | 0.0000 | 1.4478 | 0 |
| 1431 | 209.5 | 0.8664 | 0.3608 | 10.5399 | 3.5443 | 0.0000 | 2.3562 | 0.0000 | 3.5398 | 0.0000 | 2.3915 | 0.0000 | 1.7904    | 0.0000 | 2.8047 | 0.0000 | 3.8412 | 0.0000 | 1.4478 | 0 |
| 1432 | 209.4 | 0.8658 | 0.3610 | 10.5479 | 3.5442 | 0.0000 | 2.3562 | 0.0000 | 3.5398 | 0.0000 | 2.3915 | 0.0000 | 1.7903    | 0.0000 | 2.8047 | 0.0000 | 3.8411 | 0.0000 | 1.4478 | 0 |
| 1433 | 209.2 | 0.8652 | 0.3612 | 10.5558 | 3.5441 | 0.0000 | 2.3561 | 0.0000 | 3.5397 | 0.0000 | 2.3915 | 0.0000 | 1.7903    | 0.0000 | 2.8047 | 0.0000 | 3.8409 | 0.0000 | 1.4478 | 0 |
| 1434 | 209.1 | 0.8646 | 0.3614 | 10.5638 | 3.5440 | 0.0000 | 2.3561 | 0.0000 | 3.5397 | 0.0000 | 2.3914 | 0.0000 | 1.7903    | 0.0000 | 2.8047 | 0.0000 | 3.8408 | 0.0000 | 1.4478 | 0 |
| 1435 | 208.9 | 0.8640 | 0.3617 | 10.5717 | 3.5439 | 0.0000 | 2.3560 | 0.0000 | 3.5396 | 0.0000 | 2.3914 | 0.0000 | 1.7902    | 0.0000 | 2.8048 | 0.0000 | 3.8407 | 0.0000 | 1.4478 | 0 |
| 1436 | 208.8 | 0.8634 | 0.3619 | 10.5797 | 3.5438 | 0.0000 | 2.3560 | 0.0000 | 3.5396 | 0.0000 | 2.3914 | 0.0000 | 1.7902    | 0.0000 | 2.8048 | 0.0000 | 3.8405 | 0.0000 | 1.4478 | 0 |
| 1437 | 208.6 | 0.8628 | 0.3621 | 10.5877 | 3.5437 | 0.0000 | 2.3559 | 0.0000 | 3.5395 | 0.0000 | 2.3913 | 0.0000 | 1.7902    | 0.0000 | 2.8048 | 0.0000 | 3.8404 | 0.0000 | 1.4478 | 0 |
| 1438 | 208.5 | 0.8622 | 0.3623 | 10.5956 | 3.5436 | 0.0000 | 2.3559 | 0.0000 | 3.5395 | 0.0000 | 2.3913 | 0.0000 | 1.7901    | 0.0000 | 2.8048 | 0.0000 | 3.8403 | 0.0000 | 1.4478 | 0 |
| 1439 | 208.3 | 0.8616 | 0.3625 | 10.6036 | 3.5435 | 0.0000 | 2.3558 | 0.0000 | 3.5394 | 0.0000 | 2.3913 | 0.0000 | 1.7901    | 0.0000 | 2.8048 | 0.0000 | 3.8402 | 0.0000 | 1.4478 | 0 |
| 1440 | 208.2 | 0.8610 | 0.3627 | 10.6116 | 3.5434 | 0.0000 | 2.3558 | 0.0000 | 3.5394 | 0.0000 | 2.3913 | 0.0000 | 1.7901    | 0.0000 | 2.8048 | 0.0000 | 3.8400 | 0.0000 | 1.4478 | 0 |
| 1441 | 208   | 0.8604 | 0.3629 | 10.6195 | 3.5433 | 0.0000 | 2.3557 | 0.0000 | 3.5394 | 0.0000 | 2.3912 | 0.0000 | 1.7900    | 0.0000 | 2.8048 | 0.0000 | 3.8399 | 0.0000 | 1.4478 | 0 |
| 1442 | 207.9 | 0.8598 | 0.3631 | 10.6275 | 3.5432 | 0.0000 | 2.3557 | 0.0000 | 3.5393 | 0.0000 | 2.3912 | 0.0000 | 1.7900    | 0.0000 | 2.8048 | 0.0000 | 3.8398 | 0.0000 | 1.4478 | 0 |
| 1443 | 207.8 | 0.8592 | 0.3634 | 10.6355 | 3.5431 | 0.0000 | 2.3557 | 0.0000 | 3.5393 | 0.0000 | 2.3912 | 0.0000 | 1.7900    | 0.0000 | 2.8049 | 0.0000 | 3.8396 | 0.0000 | 1.4478 | 0 |
| 1444 | 207.6 | 0.8586 | 0.3636 | 10.6434 | 3.5430 | 0.0000 | 2.3556 | 0.0000 | 3.5392 | 0.0000 | 2.3911 | 0.0000 | 1.7899    | 0.0000 | 2.8049 | 0.0000 | 3.8395 | 0.0000 | 1.4478 | 0 |
| 1445 | 207.5 | 0.8580 | 0.3638 | 10.6514 | 3.5429 | 0.0000 | 2.3556 | 0.0000 | 3.5392 | 0.0000 | 2.3911 | 0.0000 | 1.7899    | 0.0000 | 2.8049 | 0.0000 | 3.8394 | 0.0000 | 1.4478 | 0 |
| 1446 | 207.3 | 0.8574 | 0.3640 | 10.6594 | 3.5428 | 0.0000 | 2.3555 | 0.0000 | 3.5391 | 0.0000 | 2.3911 | 0.0000 | 1.7898    | 0.0000 | 2.8049 | 0.0000 | 3.8393 | 0.0000 | 1.4478 | 0 |
| 1447 | 207.2 | 0.8568 | 0.3642 | 10.6673 | 3.5427 | 0.0000 | 2.3555 | 0.0000 | 3.5391 | 0.0000 | 2.3911 | 0.0000 | 1.7898    | 0.0000 | 2.8049 | 0.0000 | 3.8391 | 0.0000 | 1.4478 | 0 |

| nm   | THz   | eV     | Ag     |         | cSi    |        | Fe2O3  |        | GaAs   |        | TiO2   |        | P3HT:PCBM |        | CdTe   |        | aSi    |        | SiO2   |   |
|------|-------|--------|--------|---------|--------|--------|--------|--------|--------|--------|--------|--------|-----------|--------|--------|--------|--------|--------|--------|---|
|      |       |        | n      | k       | n      | k      | n      | k      | n      | k      | n      | k      | n         | k      | n      | k      | n      | k      | n      | k |
| 1448 | 207   | 0.8562 | 0.3644 | 10.6753 | 3.5426 | 0.0000 | 2.3554 | 0.0000 | 3.5390 | 0.0000 | 2.3910 | 0.0000 | 1.7898    | 0.0000 | 2.8049 | 0.0000 | 3.8390 | 0.0000 | 1.4478 | 0 |
| 1449 | 206.9 | 0.8557 | 0.3647 | 10.6833 | 3.5425 | 0.0000 | 2.3554 | 0.0000 | 3.5390 | 0.0000 | 2.3910 | 0.0000 | 1.7897    | 0.0000 | 2.8049 | 0.0000 | 3.8389 | 0.0000 | 1.4478 | 0 |
| 1450 | 206.8 | 0.8551 | 0.3649 | 10.6913 | 3.5424 | 0.0000 | 2.3553 | 0.0000 | 3.5389 | 0.0000 | 2.3910 | 0.0000 | 1.7897    | 0.0000 | 2.8050 | 0.0000 | 3.8387 | 0.0000 | 1.4478 | 0 |
| 1451 | 206.6 | 0.8545 | 0.3651 | 10.6992 | 3.5423 | 0.0000 | 2.3553 | 0.0000 | 3.5389 | 0.0000 | 2.3909 | 0.0000 | 1.7897    | 0.0000 | 2.8050 | 0.0000 | 3.8386 | 0.0000 | 1.4478 | 0 |
| 1452 | 206.5 | 0.8539 | 0.3653 | 10.7072 | 3.5422 | 0.0000 | 2.3552 | 0.0000 | 3.5389 | 0.0000 | 2.3909 | 0.0000 | 1.7896    | 0.0000 | 2.8050 | 0.0000 | 3.8385 | 0.0000 | 1.4478 | 0 |
| 1453 | 206.3 | 0.8533 | 0.3655 | 10.7152 | 3.5421 | 0.0000 | 2.3552 | 0.0000 | 3.5388 | 0.0000 | 2.3909 | 0.0000 | 1.7896    | 0.0000 | 2.8050 | 0.0000 | 3.8384 | 0.0000 | 1.4478 | 0 |
| 1454 | 206.2 | 0.8527 | 0.3657 | 10.7231 | 3.5420 | 0.0000 | 2.3552 | 0.0000 | 3.5388 | 0.0000 | 2.3909 | 0.0000 | 1.7896    | 0.0000 | 2.8050 | 0.0000 | 3.8382 | 0.0000 | 1.4478 | 0 |
| 1455 | 206   | 0.8521 | 0.3659 | 10.7311 | 3.5419 | 0.0000 | 2.3551 | 0.0000 | 3.5387 | 0.0000 | 2.3908 | 0.0000 | 1.7895    | 0.0000 | 2.8050 | 0.0000 | 3.8381 | 0.0000 | 1.4478 | 0 |
| 1456 | 205.9 | 0.8515 | 0.3662 | 10.7391 | 3.5418 | 0.0000 | 2.3551 | 0.0000 | 3.5387 | 0.0000 | 2.3908 | 0.0000 | 1.7895    | 0.0000 | 2.8050 | 0.0000 | 3.8380 | 0.0000 | 1.4477 | 0 |
| 1457 | 205.8 | 0.8510 | 0.3664 | 10.7471 | 3.5418 | 0.0000 | 2.3550 | 0.0000 | 3.5386 | 0.0000 | 2.3908 | 0.0000 | 1.7895    | 0.0000 | 2.8051 | 0.0000 | 3.8379 | 0.0000 | 1.4477 | 0 |
| 1458 | 205.6 | 0.8504 | 0.3666 | 10.7551 | 3.5417 | 0.0000 | 2.3550 | 0.0000 | 3.5386 | 0.0000 | 2.3907 | 0.0000 | 1.7895    | 0.0000 | 2.8051 | 0.0000 | 3.8377 | 0.0000 | 1.4477 | 0 |
| 1459 | 205.5 | 0.8498 | 0.3668 | 10.7630 | 3.5416 | 0.0000 | 2.3549 | 0.0000 | 3.5385 | 0.0000 | 2.3907 | 0.0000 | 1.7894    | 0.0000 | 2.8051 | 0.0000 | 3.8376 | 0.0000 | 1.4477 | 0 |
| 1460 | 205.3 | 0.8492 | 0.3670 | 10.7710 | 3.5415 | 0.0000 | 2.3549 | 0.0000 | 3.5385 | 0.0000 | 2.3907 | 0.0000 | 1.7894    | 0.0000 | 2.8051 | 0.0000 | 3.8375 | 0.0000 | 1.4477 | 0 |
| 1461 | 205.2 | 0.8486 | 0.3672 | 10.7790 | 3.5414 | 0.0000 | 2.3548 | 0.0000 | 3.5385 | 0.0000 | 2.3907 | 0.0000 | 1.7894    | 0.0000 | 2.8051 | 0.0000 | 3.8374 | 0.0000 | 1.4477 | 0 |
| 1462 | 205.1 | 0.8480 | 0.3675 | 10.7870 | 3.5413 | 0.0000 | 2.3548 | 0.0000 | 3.5384 | 0.0000 | 2.3906 | 0.0000 | 1.7893    | 0.0000 | 2.8051 | 0.0000 | 3.8373 | 0.0000 | 1.4477 | 0 |
| 1463 | 204.9 | 0.8475 | 0.3677 | 10.7950 | 3.5412 | 0.0000 | 2.3548 | 0.0000 | 3.5384 | 0.0000 | 2.3906 | 0.0000 | 1.7893    | 0.0000 | 2.8052 | 0.0000 | 3.8371 | 0.0000 | 1.4477 | 0 |
| 1464 | 204.8 | 0.8469 | 0.3679 | 10.8029 | 3.5411 | 0.0000 | 2.3547 | 0.0000 | 3.5383 | 0.0000 | 2.3906 | 0.0000 | 1.7893    | 0.0000 | 2.8052 | 0.0000 | 3.8370 | 0.0000 | 1.4477 | 0 |
| 1465 | 204.6 | 0.8463 | 0.3681 | 10.8109 | 3.5410 | 0.0000 | 2.3547 | 0.0000 | 3.5383 | 0.0000 | 2.3905 | 0.0000 | 1.7892    | 0.0000 | 2.8052 | 0.0000 | 3.8369 | 0.0000 | 1.4477 | 0 |
| 1466 | 204.5 | 0.8457 | 0.3683 | 10.8189 | 3.5409 | 0.0000 | 2.3546 | 0.0000 | 3.5382 | 0.0000 | 2.3905 | 0.0000 | 1.7892    | 0.0000 | 2.8052 | 0.0000 | 3.8368 | 0.0000 | 1.4477 | 0 |
| 1467 | 204.4 | 0.8452 | 0.3685 | 10.8269 | 3.5408 | 0.0000 | 2.3546 | 0.0000 | 3.5382 | 0.0000 | 2.3905 | 0.0000 | 1.7892    | 0.0000 | 2.8052 | 0.0000 | 3.8366 | 0.0000 | 1.4477 | 0 |
| 1468 | 204.2 | 0.8446 | 0.3688 | 10.8349 | 3.5407 | 0.0000 | 2.3545 | 0.0000 | 3.5382 | 0.0000 | 2.3905 | 0.0000 | 1.7891    | 0.0000 | 2.8052 | 0.0000 | 3.8365 | 0.0000 | 1.4477 | 0 |
| 1469 | 204.1 | 0.8440 | 0.3690 | 10.8429 | 3.5406 | 0.0000 | 2.3545 | 0.0000 | 3.5381 | 0.0000 | 2.3904 | 0.0000 | 1.7891    | 0.0000 | 2.8053 | 0.0000 | 3.8364 | 0.0000 | 1.4477 | 0 |
| 1470 | 203.9 | 0.8434 | 0.3692 | 10.8508 | 3.5406 | 0.0000 | 2.3544 | 0.0000 | 3.5381 | 0.0000 | 2.3904 | 0.0000 | 1.7891    | 0.0000 | 2.8053 | 0.0000 | 3.8363 | 0.0000 | 1.4477 | 0 |
| 1471 | 203.8 | 0.8429 | 0.3694 | 10.8588 | 3.5405 | 0.0000 | 2.3544 | 0.0000 | 3.5380 | 0.0000 | 2.3904 | 0.0000 | 1.7890    | 0.0000 | 2.8053 | 0.0000 | 3.8362 | 0.0000 | 1.4477 | 0 |
| 1472 | 203.7 | 0.8423 | 0.3696 | 10.8668 | 3.5404 | 0.0000 | 2.3544 | 0.0000 | 3.5380 | 0.0000 | 2.3904 | 0.0000 | 1.7890    | 0.0000 | 2.8053 | 0.0000 | 3.8360 | 0.0000 | 1.4477 | 0 |
| 1473 | 203.5 | 0.8417 | 0.3699 | 10.8748 | 3.5403 | 0.0000 | 2.3543 | 0.0000 | 3.5379 | 0.0000 | 2.3903 | 0.0000 | 1.7890    | 0.0000 | 2.8053 | 0.0000 | 3.8359 | 0.0000 | 1.4477 | 0 |
| 1474 | 203.4 | 0.8411 | 0.3701 | 10.8828 | 3.5402 | 0.0000 | 2.3543 | 0.0000 | 3.5379 | 0.0000 | 2.3903 | 0.0000 | 1.7889    | 0.0000 | 2.8054 | 0.0000 | 3.8358 | 0.0000 | 1.4477 | 0 |
| 1475 | 203.2 | 0.8406 | 0.3703 | 10.8908 | 3.5401 | 0.0000 | 2.3542 | 0.0000 | 3.5379 | 0.0000 | 2.3903 | 0.0000 | 1.7889    | 0.0000 | 2.8054 | 0.0000 | 3.8357 | 0.0000 | 1.4477 | 0 |
| 1476 | 203.1 | 0.8400 | 0.3705 | 10.8988 | 3.5400 | 0.0000 | 2.3542 | 0.0000 | 3.5378 | 0.0000 | 2.3902 | 0.0000 | 1.7889    | 0.0000 | 2.8054 | 0.0000 | 3.8356 | 0.0000 | 1.4477 | 0 |
| 1477 | 203   | 0.8394 | 0.3707 | 10.9068 | 3.5399 | 0.0000 | 2.3542 | 0.0000 | 3.5378 | 0.0000 | 2.3902 | 0.0000 | 1.7888    | 0.0000 | 2.8054 | 0.0000 | 3.8355 | 0.0000 | 1.4477 | 0 |
| 1478 | 202.8 | 0.8389 | 0.3710 | 10.9148 | 3.5398 | 0.0000 | 2.3541 | 0.0000 | 3.5377 | 0.0000 | 2.3902 | 0.0000 | 1.7888    | 0.0000 | 2.8054 | 0.0000 | 3.8353 | 0.0000 | 1.4477 | 0 |
| 1479 | 202.7 | 0.8383 | 0.3712 | 10.9227 | 3.5397 | 0.0000 | 2.3541 | 0.0000 | 3.5377 | 0.0000 | 2.3902 | 0.0000 | 1.7888    | 0.0000 | 2.8054 | 0.0000 | 3.8352 | 0.0000 | 1.4477 | 0 |



| nm   | THz   | eV     | Ag     |         | cSi    |        | Fe2O3  |        | GaAs   |        | TiO2   |        | P3HT:PCBM |        | CdTe   |        | aSi    |        | SiO2   |   |
|------|-------|--------|--------|---------|--------|--------|--------|--------|--------|--------|--------|--------|-----------|--------|--------|--------|--------|--------|--------|---|
|      |       |        | n      | k       | n      | k      | n      | k      | n      | k      | n      | k      | n         | k      | n      | k      | n      | k      | n      | k |
| 1480 | 202.6 | 0.8377 | 0.3714 | 10.9307 | 3.5397 | 0.0000 | 2.3540 | 0.0000 | 3.5376 | 0.0000 | 2.3901 | 0.0000 | 1.7888    | 0.0000 | 2.8055 | 0.0000 | 3.8351 | 0.0000 | 1.4477 | 0 |
| 1481 | 202.4 | 0.8372 | 0.3716 | 10.9387 | 3.5396 | 0.0000 | 2.3540 | 0.0000 | 3.5376 | 0.0000 | 2.3901 | 0.0000 | 1.7887    | 0.0000 | 2.8055 | 0.0000 | 3.8350 | 0.0000 | 1.4477 | 0 |
| 1482 | 202.3 | 0.8366 | 0.3718 | 10.9467 | 3.5395 | 0.0000 | 2.3539 | 0.0000 | 3.5376 | 0.0000 | 2.3901 | 0.0000 | 1.7887    | 0.0000 | 2.8055 | 0.0000 | 3.8349 | 0.0000 | 1.4477 | 0 |
| 1483 | 202.2 | 0.8360 | 0.3721 | 10.9547 | 3.5394 | 0.0000 | 2.3539 | 0.0000 | 3.5375 | 0.0000 | 2.3901 | 0.0000 | 1.7887    | 0.0000 | 2.8055 | 0.0000 | 3.8348 | 0.0000 | 1.4477 | 0 |
| 1484 | 202   | 0.8355 | 0.3723 | 10.9627 | 3.5393 | 0.0000 | 2.3539 | 0.0000 | 3.5375 | 0.0000 | 2.3900 | 0.0000 | 1.7886    | 0.0000 | 2.8055 | 0.0000 | 3.8346 | 0.0000 | 1.4477 | 0 |
| 1485 | 201.9 | 0.8349 | 0.3725 | 10.9707 | 3.5392 | 0.0000 | 2.3538 | 0.0000 | 3.5374 | 0.0000 | 2.3900 | 0.0000 | 1.7886    | 0.0000 | 2.8056 | 0.0000 | 3.8345 | 0.0000 | 1.4477 | 0 |
| 1486 | 201.7 | 0.8343 | 0.3727 | 10.9787 | 3.5391 | 0.0000 | 2.3538 | 0.0000 | 3.5374 | 0.0000 | 2.3900 | 0.0000 | 1.7886    | 0.0000 | 2.8056 | 0.0000 | 3.8344 | 0.0000 | 1.4477 | 0 |
| 1487 | 201.6 | 0.8338 | 0.3729 | 10.9867 | 3.5390 | 0.0000 | 2.3537 | 0.0000 | 3.5374 | 0.0000 | 2.3899 | 0.0000 | 1.7885    | 0.0000 | 2.8056 | 0.0000 | 3.8343 | 0.0000 | 1.4477 | 0 |
| 1488 | 201.5 | 0.8332 | 0.3732 | 10.9947 | 3.5389 | 0.0000 | 2.3537 | 0.0000 | 3.5373 | 0.0000 | 2.3899 | 0.0000 | 1.7885    | 0.0000 | 2.8056 | 0.0000 | 3.8342 | 0.0000 | 1.4477 | 0 |
| 1489 | 201.3 | 0.8327 | 0.3734 | 11.0027 | 3.5389 | 0.0000 | 2.3537 | 0.0000 | 3.5373 | 0.0000 | 2.3899 | 0.0000 | 1.7885    | 0.0000 | 2.8057 | 0.0000 | 3.8341 | 0.0000 | 1.4477 | 0 |
| 1490 | 201.2 | 0.8321 | 0.3736 | 11.0107 | 3.5388 | 0.0000 | 2.3536 | 0.0000 | 3.5372 | 0.0000 | 2.3899 | 0.0000 | 1.7884    | 0.0000 | 2.8057 | 0.0000 | 3.8340 | 0.0000 | 1.4477 | 0 |
| 1491 | 201.1 | 0.8316 | 0.3738 | 11.0187 | 3.5387 | 0.0000 | 2.3536 | 0.0000 | 3.5372 | 0.0000 | 2.3898 | 0.0000 | 1.7884    | 0.0000 | 2.8057 | 0.0000 | 3.8338 | 0.0000 | 1.4477 | 0 |
| 1492 | 200.9 | 0.8310 | 0.3741 | 11.0267 | 3.5386 | 0.0000 | 2.3535 | 0.0000 | 3.5372 | 0.0000 | 2.3898 | 0.0000 | 1.7884    | 0.0000 | 2.8057 | 0.0000 | 3.8337 | 0.0000 | 1.4477 | 0 |
| 1493 | 200.8 | 0.8304 | 0.3743 | 11.0347 | 3.5385 | 0.0000 | 2.3535 | 0.0000 | 3.5371 | 0.0000 | 2.3898 | 0.0000 | 1.7884    | 0.0000 | 2.8057 | 0.0000 | 3.8336 | 0.0000 | 1.4477 | 0 |
| 1494 | 200.7 | 0.8299 | 0.3745 | 11.0427 | 3.5384 | 0.0000 | 2.3534 | 0.0000 | 3.5371 | 0.0000 | 2.3898 | 0.0000 | 1.7883    | 0.0000 | 2.8058 | 0.0000 | 3.8335 | 0.0000 | 1.4477 | 0 |
| 1495 | 200.5 | 0.8293 | 0.3747 | 11.0507 | 3.5383 | 0.0000 | 2.3534 | 0.0000 | 3.5370 | 0.0000 | 2.3897 | 0.0000 | 1.7883    | 0.0000 | 2.8058 | 0.0000 | 3.8334 | 0.0000 | 1.4477 | 0 |
| 1496 | 200.4 | 0.8288 | 0.3749 | 11.0587 | 3.5383 | 0.0000 | 2.3534 | 0.0000 | 3.5370 | 0.0000 | 2.3897 | 0.0000 | 1.7883    | 0.0000 | 2.8058 | 0.0000 | 3.8333 | 0.0000 | 1.4477 | 0 |
| 1497 | 200.3 | 0.8282 | 0.3752 | 11.0667 | 3.5382 | 0.0000 | 2.3533 | 0.0000 | 3.5370 | 0.0000 | 2.3897 | 0.0000 | 1.7882    | 0.0000 | 2.8058 | 0.0000 | 3.8332 | 0.0000 | 1.4477 | 0 |
| 1498 | 200.1 | 0.8277 | 0.3754 | 11.0747 | 3.5381 | 0.0000 | 2.3533 | 0.0000 | 3.5369 | 0.0000 | 2.3897 | 0.0000 | 1.7882    | 0.0000 | 2.8059 | 0.0000 | 3.8331 | 0.0000 | 1.4477 | 0 |
| 1499 | 200   | 0.8271 | 0.3756 | 11.0827 | 3.5380 | 0.0000 | 2.3532 | 0.0000 | 3.5369 | 0.0000 | 2.3896 | 0.0000 | 1.7882    | 0.0000 | 2.8059 | 0.0000 | 3.8329 | 0.0000 | 1.4477 | 0 |
| 1500 | 199.9 | 0.8266 | 0.3758 | 11.0907 | 3.5379 | 0.0000 | 2.3532 | 0.0000 | 3.5368 | 0.0000 | 2.3896 | 0.0000 | 1.7882    | 0.0000 | 2.8059 | 0.0000 | 3.8328 | 0.0000 | 1.4477 | 0 |
| 1501 | 199.7 | 0.8260 | 0.3761 | 11.0988 | 3.5378 | 0.0000 | 2.3532 | 0.0000 | 3.5368 | 0.0000 | 2.3896 | 0.0000 | 1.7881    | 0.0000 | 2.8059 | 0.0000 | 3.8327 | 0.0000 | 1.4477 | 0 |
| 1502 | 199.6 | 0.8255 | 0.3763 | 11.1068 | 3.5377 | 0.0000 | 2.3531 | 0.0000 | 3.5368 | 0.0000 | 2.3896 | 0.0000 | 1.7881    | 0.0000 | 2.8059 | 0.0000 | 3.8326 | 0.0000 | 1.4477 | 0 |
| 1503 | 199.5 | 0.8249 | 0.3765 | 11.1148 | 3.5377 | 0.0000 | 2.3531 | 0.0000 | 3.5367 | 0.0000 | 2.3895 | 0.0000 | 1.7881    | 0.0000 | 2.8060 | 0.0000 | 3.8325 | 0.0000 | 1.4477 | 0 |
| 1504 | 199.3 | 0.8244 | 0.3767 | 11.1228 | 3.5376 | 0.0000 | 2.3530 | 0.0000 | 3.5367 | 0.0000 | 2.3895 | 0.0000 | 1.7880    | 0.0000 | 2.8060 | 0.0000 | 3.8324 | 0.0000 | 1.4477 | 0 |
| 1505 | 199.2 | 0.8238 | 0.3770 | 11.1308 | 3.5375 | 0.0000 | 2.3530 | 0.0000 | 3.5366 | 0.0000 | 2.3895 | 0.0000 | 1.7880    | 0.0000 | 2.8060 | 0.0000 | 3.8323 | 0.0000 | 1.4476 | 0 |
| 1506 | 199.1 | 0.8233 | 0.3772 | 11.1388 | 3.5374 | 0.0000 | 2.3530 | 0.0000 | 3.5366 | 0.0000 | 2.3895 | 0.0000 | 1.7880    | 0.0000 | 2.8060 | 0.0000 | 3.8322 | 0.0000 | 1.4476 | 0 |
| 1507 | 198.9 | 0.8227 | 0.3774 | 11.1468 | 3.5373 | 0.0000 | 2.3529 | 0.0000 | 3.5366 | 0.0000 | 2.3894 | 0.0000 | 1.7880    | 0.0000 | 2.8061 | 0.0000 | 3.8321 | 0.0000 | 1.4476 | 0 |
| 1508 | 198.8 | 0.8222 | 0.3776 | 11.1548 | 3.5372 | 0.0000 | 2.3529 | 0.0000 | 3.5365 | 0.0000 | 2.3894 | 0.0000 | 1.7879    | 0.0000 | 2.8061 | 0.0000 | 3.8320 | 0.0000 | 1.4476 | 0 |
| 1509 | 198.7 | 0.8216 | 0.3779 | 11.1628 | 3.5372 | 0.0000 | 2.3529 | 0.0000 | 3.5365 | 0.0000 | 2.3894 | 0.0000 | 1.7879    | 0.0000 | 2.8061 | 0.0000 | 3.8318 | 0.0000 | 1.4476 | 0 |
| 1510 | 198.5 | 0.8211 | 0.3781 | 11.1709 | 3.5371 | 0.0000 | 2.3528 | 0.0000 | 3.5364 | 0.0000 | 2.3894 | 0.0000 | 1.7879    | 0.0000 | 2.8061 | 0.0000 | 3.8317 | 0.0000 | 1.4476 | 0 |
| 1511 | 198.4 | 0.8205 | 0.3783 | 11.1789 | 3.5370 | 0.0000 | 2.3528 | 0.0000 | 3.5364 | 0.0000 | 2.3893 | 0.0000 | 1.7878    | 0.0000 | 2.8062 | 0.0000 | 3.8316 | 0.0000 | 1.4476 | 0 |

| nm   | THz   | eV     | Ag     |         | cSi    |        | Fe2O3  |        | GaAs   |        | TiO2   |        | P3HT:PCBM |        | CdTe   |        | aSi    |        | SiO2   |   |
|------|-------|--------|--------|---------|--------|--------|--------|--------|--------|--------|--------|--------|-----------|--------|--------|--------|--------|--------|--------|---|
|      |       |        | n      | k       | n      | k      | n      | k      | n      | k      | n      | k      | n         | k      | n      | k      | n      | k      | n      | k |
| 1512 | 198.3 | 0.8200 | 0.3785 | 11.1869 | 3.5369 | 0.0000 | 2.3527 | 0.0000 | 3.5364 | 0.0000 | 2.3893 | 0.0000 | 1.7878    | 0.0000 | 2.8062 | 0.0000 | 3.8315 | 0.0000 | 1.4476 | 0 |
| 1513 | 198.1 | 0.8195 | 0.3788 | 11.1949 | 3.5368 | 0.0000 | 2.3527 | 0.0000 | 3.5363 | 0.0000 | 2.3893 | 0.0000 | 1.7878    | 0.0000 | 2.8062 | 0.0000 | 3.8314 | 0.0000 | 1.4476 | 0 |
| 1514 | 198   | 0.8189 | 0.3790 | 11.2029 | 3.5367 | 0.0000 | 2.3527 | 0.0000 | 3.5363 | 0.0000 | 2.3893 | 0.0000 | 1.7878    | 0.0000 | 2.8062 | 0.0000 | 3.8313 | 0.0000 | 1.4476 | 0 |
| 1515 | 197.9 | 0.8184 | 0.3792 | 11.2109 | 3.5367 | 0.0000 | 2.3526 | 0.0000 | 3.5363 | 0.0000 | 2.3892 | 0.0000 | 1.7877    | 0.0000 | 2.8063 | 0.0000 | 3.8312 | 0.0000 | 1.4476 | 0 |
| 1516 | 197.8 | 0.8178 | 0.3794 | 11.2190 | 3.5366 | 0.0000 | 2.3526 | 0.0000 | 3.5362 | 0.0000 | 2.3892 | 0.0000 | 1.7877    | 0.0000 | 2.8063 | 0.0000 | 3.8311 | 0.0000 | 1.4476 | 0 |
| 1517 | 197.6 | 0.8173 | 0.3797 | 11.2270 | 3.5365 | 0.0000 | 2.3525 | 0.0000 | 3.5362 | 0.0000 | 2.3892 | 0.0000 | 1.7877    | 0.0000 | 2.8063 | 0.0000 | 3.8310 | 0.0000 | 1.4476 | 0 |
| 1518 | 197.5 | 0.8168 | 0.3799 | 11.2350 | 3.5364 | 0.0000 | 2.3525 | 0.0000 | 3.5361 | 0.0000 | 2.3892 | 0.0000 | 1.7876    | 0.0000 | 2.8063 | 0.0000 | 3.8309 | 0.0000 | 1.4476 | 0 |
| 1519 | 197.4 | 0.8162 | 0.3801 | 11.2430 | 3.5363 | 0.0000 | 2.3525 | 0.0000 | 3.5361 | 0.0000 | 2.3891 | 0.0000 | 1.7876    | 0.0000 | 2.8064 | 0.0000 | 3.8308 | 0.0000 | 1.4476 | 0 |
| 1520 | 197.2 | 0.8157 | 0.3804 | 11.2511 | 3.5362 | 0.0000 | 2.3524 | 0.0000 | 3.5361 | 0.0000 | 2.3891 | 0.0000 | 1.7876    | 0.0000 | 2.8064 | 0.0000 | 3.8307 | 0.0000 | 1.4476 | 0 |
| 1521 | 197.1 | 0.8151 | 0.3806 | 11.2591 | 3.5362 | 0.0000 | 2.3524 | 0.0000 | 3.5360 | 0.0000 | 2.3891 | 0.0000 | 1.7876    | 0.0000 | 2.8064 | 0.0000 | 3.8306 | 0.0000 | 1.4476 | 0 |
| 1522 | 197   | 0.8146 | 0.3808 | 11.2671 | 3.5361 | 0.0000 | 2.3524 | 0.0000 | 3.5360 | 0.0000 | 2.3891 | 0.0000 | 1.7875    | 0.0000 | 2.8064 | 0.0000 | 3.8305 | 0.0000 | 1.4476 | 0 |
| 1523 | 196.8 | 0.8141 | 0.3810 | 11.2751 | 3.5360 | 0.0000 | 2.3523 | 0.0000 | 3.5360 | 0.0000 | 2.3890 | 0.0000 | 1.7875    | 0.0000 | 2.8065 | 0.0000 | 3.8304 | 0.0000 | 1.4476 | 0 |
| 1524 | 196.7 | 0.8135 | 0.3813 | 11.2832 | 3.5359 | 0.0000 | 2.3523 | 0.0000 | 3.5359 | 0.0000 | 2.3890 | 0.0000 | 1.7875    | 0.0000 | 2.8065 | 0.0000 | 3.8302 | 0.0000 | 1.4476 | 0 |
| 1525 | 196.6 | 0.8130 | 0.3815 | 11.2912 | 3.5358 | 0.0000 | 2.3522 | 0.0000 | 3.5359 | 0.0000 | 2.3890 | 0.0000 | 1.7874    | 0.0000 | 2.8065 | 0.0000 | 3.8301 | 0.0000 | 1.4476 | 0 |
| 1526 | 196.5 | 0.8125 | 0.3817 | 11.2992 | 3.5358 | 0.0000 | 2.3522 | 0.0000 | 3.5358 | 0.0000 | 2.3890 | 0.0000 | 1.7874    | 0.0000 | 2.8065 | 0.0000 | 3.8300 | 0.0000 | 1.4476 | 0 |
| 1527 | 196.3 | 0.8119 | 0.3819 | 11.3072 | 3.5357 | 0.0000 | 2.3522 | 0.0000 | 3.5358 | 0.0000 | 2.3889 | 0.0000 | 1.7874    | 0.0000 | 2.8066 | 0.0000 | 3.8299 | 0.0000 | 1.4476 | 0 |
| 1528 | 196.2 | 0.8114 | 0.3822 | 11.3153 | 3.5356 | 0.0000 | 2.3521 | 0.0000 | 3.5358 | 0.0000 | 2.3889 | 0.0000 | 1.7874    | 0.0000 | 2.8066 | 0.0000 | 3.8298 | 0.0000 | 1.4476 | 0 |
| 1529 | 196.1 | 0.8109 | 0.3824 | 11.3233 | 3.5355 | 0.0000 | 2.3521 | 0.0000 | 3.5357 | 0.0000 | 2.3889 | 0.0000 | 1.7873    | 0.0000 | 2.8066 | 0.0000 | 3.8297 | 0.0000 | 1.4476 | 0 |
| 1530 | 195.9 | 0.8104 | 0.3826 | 11.3313 | 3.5354 | 0.0000 | 2.3521 | 0.0000 | 3.5357 | 0.0000 | 2.3889 | 0.0000 | 1.7873    | 0.0000 | 2.8067 | 0.0000 | 3.8296 | 0.0000 | 1.4476 | 0 |
| 1531 | 195.8 | 0.8098 | 0.3829 | 11.3393 | 3.5354 | 0.0000 | 2.3520 | 0.0000 | 3.5357 | 0.0000 | 2.3888 | 0.0000 | 1.7873    | 0.0000 | 2.8067 | 0.0000 | 3.8295 | 0.0000 | 1.4476 | 0 |
| 1532 | 195.7 | 0.8093 | 0.3831 | 11.3474 | 3.5353 | 0.0000 | 2.3520 | 0.0000 | 3.5356 | 0.0000 | 2.3888 | 0.0000 | 1.7873    | 0.0000 | 2.8067 | 0.0000 | 3.8294 | 0.0000 | 1.4476 | 0 |
| 1533 | 195.6 | 0.8088 | 0.3833 | 11.3554 | 3.5352 | 0.0000 | 2.3519 | 0.0000 | 3.5356 | 0.0000 | 2.3888 | 0.0000 | 1.7872    | 0.0000 | 2.8067 | 0.0000 | 3.8293 | 0.0000 | 1.4476 | 0 |
| 1534 | 195.4 | 0.8082 | 0.3836 | 11.3634 | 3.5351 | 0.0000 | 2.3519 | 0.0000 | 3.5356 | 0.0000 | 2.3888 | 0.0000 | 1.7872    | 0.0000 | 2.8068 | 0.0000 | 3.8292 | 0.0000 | 1.4476 | 0 |
| 1535 | 195.3 | 0.8077 | 0.3838 | 11.3715 | 3.5350 | 0.0000 | 2.3519 | 0.0000 | 3.5355 | 0.0000 | 2.3887 | 0.0000 | 1.7872    | 0.0000 | 2.8068 | 0.0000 | 3.8291 | 0.0000 | 1.4476 | 0 |
| 1536 | 195.2 | 0.8072 | 0.3840 | 11.3795 | 3.5350 | 0.0000 | 2.3518 | 0.0000 | 3.5355 | 0.0000 | 2.3887 | 0.0000 | 1.7871    | 0.0000 | 2.8068 | 0.0000 | 3.8290 | 0.0000 | 1.4476 | 0 |
| 1537 | 195.1 | 0.8067 | 0.3842 | 11.3875 | 3.5349 | 0.0000 | 2.3518 | 0.0000 | 3.5354 | 0.0000 | 2.3887 | 0.0000 | 1.7871    | 0.0000 | 2.8069 | 0.0000 | 3.8289 | 0.0000 | 1.4476 | 0 |
| 1538 | 194.9 | 0.8061 | 0.3845 | 11.3956 | 3.5348 | 0.0000 | 2.3518 | 0.0000 | 3.5354 | 0.0000 | 2.3887 | 0.0000 | 1.7871    | 0.0000 | 2.8069 | 0.0000 | 3.8288 | 0.0000 | 1.4476 | 0 |
| 1539 | 194.8 | 0.8056 | 0.3847 | 11.4036 | 3.5347 | 0.0000 | 2.3517 | 0.0000 | 3.5354 | 0.0000 | 2.3886 | 0.0000 | 1.7871    | 0.0000 | 2.8069 | 0.0000 | 3.8287 | 0.0000 | 1.4476 | 0 |
| 1540 | 194.7 | 0.8051 | 0.3849 | 11.4117 | 3.5346 | 0.0000 | 2.3517 | 0.0000 | 3.5353 | 0.0000 | 2.3886 | 0.0000 | 1.7870    | 0.0000 | 2.8069 | 0.0000 | 3.8286 | 0.0000 | 1.4476 | 0 |
| 1541 | 194.5 | 0.8046 | 0.3852 | 11.4197 | 3.5346 | 0.0000 | 2.3517 | 0.0000 | 3.5353 | 0.0000 | 2.3886 | 0.0000 | 1.7870    | 0.0000 | 2.8070 | 0.0000 | 3.8285 | 0.0000 | 1.4476 | 0 |
| 1542 | 194.4 | 0.8040 | 0.3854 | 11.4277 | 3.5345 | 0.0000 | 2.3516 | 0.0000 | 3.5353 | 0.0000 | 2.3886 | 0.0000 | 1.7870    | 0.0000 | 2.8070 | 0.0000 | 3.8284 | 0.0000 | 1.4476 | 0 |
| 1543 | 194.3 | 0.8035 | 0.3856 | 11.4358 | 3.5344 | 0.0000 | 2.3516 | 0.0000 | 3.5352 | 0.0000 | 2.3885 | 0.0000 | 1.7870    | 0.0000 | 2.8070 | 0.0000 | 3.8283 | 0.0000 | 1.4476 | 0 |

| nm   | THz   | eV     | Ag     |         | cSi    |        | Fe2O3  |        | GaAs   |        | TiO2   |        | P3HT:PCBM |        | CdTe   |        | aSi    |        | SiO2   |   |
|------|-------|--------|--------|---------|--------|--------|--------|--------|--------|--------|--------|--------|-----------|--------|--------|--------|--------|--------|--------|---|
|      |       |        | n      | k       | n      | k      | n      | k      | n      | k      | n      | k      | n         | k      | n      | k      | n      | k      | n      | k |
| 1544 | 194.2 | 0.8030 | 0.3859 | 11.4438 | 3.5343 | 0.0000 | 2.3515 | 0.0000 | 3.5352 | 0.0000 | 2.3885 | 0.0000 | 1.7869    | 0.0000 | 2.8071 | 0.0000 | 3.8282 | 0.0000 | 1.4476 | 0 |
| 1545 | 194   | 0.8025 | 0.3861 | 11.4519 | 3.5343 | 0.0000 | 2.3515 | 0.0000 | 3.5352 | 0.0000 | 2.3885 | 0.0000 | 1.7869    | 0.0000 | 2.8071 | 0.0000 | 3.8281 | 0.0000 | 1.4476 | 0 |
| 1546 | 193.9 | 0.8020 | 0.3863 | 11.4599 | 3.5342 | 0.0000 | 2.3515 | 0.0000 | 3.5351 | 0.0000 | 2.3885 | 0.0000 | 1.7869    | 0.0000 | 2.8071 | 0.0000 | 3.8280 | 0.0000 | 1.4476 | 0 |
| 1547 | 193.8 | 0.8014 | 0.3866 | 11.4679 | 3.5341 | 0.0000 | 2.3514 | 0.0000 | 3.5351 | 0.0000 | 2.3885 | 0.0000 | 1.7869    | 0.0000 | 2.8071 | 0.0000 | 3.8279 | 0.0000 | 1.4476 | 0 |
| 1548 | 193.7 | 0.8009 | 0.3868 | 11.4760 | 3.5340 | 0.0000 | 2.3514 | 0.0000 | 3.5351 | 0.0000 | 2.3884 | 0.0000 | 1.7868    | 0.0000 | 2.8072 | 0.0000 | 3.8278 | 0.0000 | 1.4476 | 0 |
| 1549 | 193.5 | 0.8004 | 0.3870 | 11.4840 | 3.5339 | 0.0000 | 2.3514 | 0.0000 | 3.5350 | 0.0000 | 2.3884 | 0.0000 | 1.7868    | 0.0000 | 2.8072 | 0.0000 | 3.8277 | 0.0000 | 1.4476 | 0 |
| 1550 | 193.4 | 0.7999 | 0.3873 | 11.4921 | 3.5339 | 0.0000 | 2.3513 | 0.0000 | 3.5350 | 0.0000 | 2.3884 | 0.0000 | 1.7868    | 0.0000 | 2.8072 | 0.0000 | 3.8276 | 0.0000 | 1.4476 | 0 |
| 1551 | 193.3 | 0.7994 | 0.3875 | 11.5001 | 3.5338 | 0.0000 | 2.3513 | 0.0000 | 3.5350 | 0.0000 | 2.3884 | 0.0000 | 1.7868    | 0.0000 | 2.8073 | 0.0000 | 3.8275 | 0.0000 | 1.4476 | 0 |
| 1552 | 193.2 | 0.7989 | 0.3877 | 11.5082 | 3.5337 | 0.0000 | 2.3513 | 0.0000 | 3.5349 | 0.0000 | 2.3883 | 0.0000 | 1.7867    | 0.0000 | 2.8073 | 0.0000 | 3.8274 | 0.0000 | 1.4476 | 0 |
| 1553 | 193   | 0.7984 | 0.3880 | 11.5162 | 3.5336 | 0.0000 | 2.3512 | 0.0000 | 3.5349 | 0.0000 | 2.3883 | 0.0000 | 1.7867    | 0.0000 | 2.8073 | 0.0000 | 3.8273 | 0.0000 | 1.4476 | 0 |
| 1554 | 192.9 | 0.7978 | 0.3882 | 11.5243 | 3.5336 | 0.0000 | 2.3512 | 0.0000 | 3.5348 | 0.0000 | 2.3883 | 0.0000 | 1.7867    | 0.0000 | 2.8074 | 0.0000 | 3.8272 | 0.0000 | 1.4476 | 0 |
| 1555 | 192.8 | 0.7973 | 0.3884 | 11.5323 | 3.5335 | 0.0000 | 2.3512 | 0.0000 | 3.5348 | 0.0000 | 2.3883 | 0.0000 | 1.7867    | 0.0000 | 2.8074 | 0.0000 | 3.8271 | 0.0000 | 1.4476 | 0 |
| 1556 | 192.7 | 0.7968 | 0.3887 | 11.5404 | 3.5334 | 0.0000 | 2.3511 | 0.0000 | 3.5348 | 0.0000 | 2.3882 | 0.0000 | 1.7866    | 0.0000 | 2.8074 | 0.0000 | 3.8270 | 0.0000 | 1.4476 | 0 |
| 1557 | 192.5 | 0.7963 | 0.3889 | 11.5484 | 3.5333 | 0.0000 | 2.3511 | 0.0000 | 3.5347 | 0.0000 | 2.3882 | 0.0000 | 1.7866    | 0.0000 | 2.8075 | 0.0000 | 3.8269 | 0.0000 | 1.4476 | 0 |
| 1558 | 192.4 | 0.7958 | 0.3891 | 11.5565 | 3.5333 | 0.0000 | 2.3511 | 0.0000 | 3.5347 | 0.0000 | 2.3882 | 0.0000 | 1.7866    | 0.0000 | 2.8075 | 0.0000 | 3.8268 | 0.0000 | 1.4476 | 0 |
| 1559 | 192.3 | 0.7953 | 0.3894 | 11.5645 | 3.5332 | 0.0000 | 2.3510 | 0.0000 | 3.5347 | 0.0000 | 2.3882 | 0.0000 | 1.7865    | 0.0000 | 2.8075 | 0.0000 | 3.8267 | 0.0000 | 1.4476 | 0 |
| 1560 | 192.2 | 0.7948 | 0.3896 | 11.5726 | 3.5331 | 0.0000 | 2.3510 | 0.0000 | 3.5346 | 0.0000 | 2.3882 | 0.0000 | 1.7865    | 0.0000 | 2.8075 | 0.0000 | 3.8266 | 0.0000 | 1.4475 | 0 |
| 1561 | 192.1 | 0.7943 | 0.3898 | 11.5806 | 3.5330 | 0.0000 | 2.3510 | 0.0000 | 3.5346 | 0.0000 | 2.3881 | 0.0000 | 1.7865    | 0.0000 | 2.8076 | 0.0000 | 3.8265 | 0.0000 | 1.4475 | 0 |
| 1562 | 191.9 | 0.7938 | 0.3901 | 11.5887 | 3.5330 | 0.0000 | 2.3509 | 0.0000 | 3.5346 | 0.0000 | 2.3881 | 0.0000 | 1.7865    | 0.0000 | 2.8076 | 0.0000 | 3.8265 | 0.0000 | 1.4475 | 0 |
| 1563 | 191.8 | 0.7932 | 0.3903 | 11.5967 | 3.5329 | 0.0000 | 2.3509 | 0.0000 | 3.5345 | 0.0000 | 2.3881 | 0.0000 | 1.7864    | 0.0000 | 2.8076 | 0.0000 | 3.8264 | 0.0000 | 1.4475 | 0 |
| 1564 | 191.7 | 0.7927 | 0.3905 | 11.6048 | 3.5328 | 0.0000 | 2.3509 | 0.0000 | 3.5345 | 0.0000 | 2.3881 | 0.0000 | 1.7864    | 0.0000 | 2.8077 | 0.0000 | 3.8263 | 0.0000 | 1.4475 | 0 |
| 1565 | 191.6 | 0.7922 | 0.3908 | 11.6129 | 3.5327 | 0.0000 | 2.3508 | 0.0000 | 3.5345 | 0.0000 | 2.3880 | 0.0000 | 1.7864    | 0.0000 | 2.8077 | 0.0000 | 3.8262 | 0.0000 | 1.4475 | 0 |
| 1566 | 191.4 | 0.7917 | 0.3910 | 11.6209 | 3.5327 | 0.0000 | 2.3508 | 0.0000 | 3.5344 | 0.0000 | 2.3880 | 0.0000 | 1.7864    | 0.0000 | 2.8077 | 0.0000 | 3.8261 | 0.0000 | 1.4475 | 0 |
| 1567 | 191.3 | 0.7912 | 0.3912 | 11.6290 | 3.5326 | 0.0000 | 2.3508 | 0.0000 | 3.5344 | 0.0000 | 2.3880 | 0.0000 | 1.7863    | 0.0000 | 2.8078 | 0.0000 | 3.8260 | 0.0000 | 1.4475 | 0 |
| 1568 | 191.2 | 0.7907 | 0.3915 | 11.6370 | 3.5325 | 0.0000 | 2.3507 | 0.0000 | 3.5344 | 0.0000 | 2.3880 | 0.0000 | 1.7863    | 0.0000 | 2.8078 | 0.0000 | 3.8259 | 0.0000 | 1.4475 | 0 |
| 1569 | 191.1 | 0.7902 | 0.3917 | 11.6451 | 3.5324 | 0.0000 | 2.3507 | 0.0000 | 3.5343 | 0.0000 | 2.3879 | 0.0000 | 1.7863    | 0.0000 | 2.8078 | 0.0000 | 3.8258 | 0.0000 | 1.4475 | 0 |
| 1570 | 191   | 0.7897 | 0.3919 | 11.6532 | 3.5324 | 0.0000 | 2.3507 | 0.0000 | 3.5343 | 0.0000 | 2.3879 | 0.0000 | 1.7863    | 0.0000 | 2.8079 | 0.0000 | 3.8257 | 0.0000 | 1.4475 | 0 |
| 1571 | 190.8 | 0.7892 | 0.3922 | 11.6612 | 3.5323 | 0.0000 | 2.3506 | 0.0000 | 3.5343 | 0.0000 | 2.3879 | 0.0000 | 1.7862    | 0.0000 | 2.8079 | 0.0000 | 3.8256 | 0.0000 | 1.4475 | 0 |
| 1572 | 190.7 | 0.7887 | 0.3924 | 11.6693 | 3.5322 | 0.0000 | 2.3506 | 0.0000 | 3.5342 | 0.0000 | 2.3879 | 0.0000 | 1.7862    | 0.0000 | 2.8079 | 0.0000 | 3.8255 | 0.0000 | 1.4475 | 0 |
| 1573 | 190.6 | 0.7882 | 0.3927 | 11.6773 | 3.5321 | 0.0000 | 2.3506 | 0.0000 | 3.5342 | 0.0000 | 2.3879 | 0.0000 | 1.7862    | 0.0000 | 2.8080 | 0.0000 | 3.8254 | 0.0000 | 1.4475 | 0 |
| 1574 | 190.5 | 0.7877 | 0.3929 | 11.6854 | 3.5321 | 0.0000 | 2.3505 | 0.0000 | 3.5342 | 0.0000 | 2.3878 | 0.0000 | 1.7862    | 0.0000 | 2.8080 | 0.0000 | 3.8253 | 0.0000 | 1.4475 | 0 |
| 1575 | 190.3 | 0.7872 | 0.3931 | 11.6935 | 3.5320 | 0.0000 | 2.3505 | 0.0000 | 3.5341 | 0.0000 | 2.3878 | 0.0000 | 1.7862    | 0.0000 | 2.8080 | 0.0000 | 3.8252 | 0.0000 | 1.4475 | 0 |

| nm   | THz   | eV     | Ag     |         | cSi    |        | Fe2O3  |        | GaAs   |        | TiO2   |        | P3HT:PCBM |        | CdTe   |        | aSi    |        | SiO2   |   |
|------|-------|--------|--------|---------|--------|--------|--------|--------|--------|--------|--------|--------|-----------|--------|--------|--------|--------|--------|--------|---|
|      |       |        | n      | k       | n      | k      | n      | k      | n      | k      | n      | k      | n         | k      | n      | k      | n      | k      | n      | k |
| 1576 | 190.2 | 0.7867 | 0.3934 | 11.7015 | 3.5319 | 0.0000 | 2.3505 | 0.0000 | 3.5341 | 0.0000 | 2.3878 | 0.0000 | 1.7861    | 0.0000 | 2.8081 | 0.0000 | 3.8251 | 0.0000 | 1.4475 | 0 |
| 1577 | 190.1 | 0.7862 | 0.3936 | 11.7096 | 3.5318 | 0.0000 | 2.3504 | 0.0000 | 3.5341 | 0.0000 | 2.3878 | 0.0000 | 1.7861    | 0.0000 | 2.8081 | 0.0000 | 3.8250 | 0.0000 | 1.4475 | 0 |
| 1578 | 190   | 0.7857 | 0.3938 | 11.7177 | 3.5318 | 0.0000 | 2.3504 | 0.0000 | 3.5340 | 0.0000 | 2.3877 | 0.0000 | 1.7861    | 0.0000 | 2.8081 | 0.0000 | 3.8250 | 0.0000 | 1.4475 | 0 |
| 1579 | 189.9 | 0.7852 | 0.3941 | 11.7257 | 3.5317 | 0.0000 | 2.3504 | 0.0000 | 3.5340 | 0.0000 | 2.3877 | 0.0000 | 1.7861    | 0.0000 | 2.8082 | 0.0000 | 3.8249 | 0.0000 | 1.4475 | 0 |
| 1580 | 189.7 | 0.7847 | 0.3943 | 11.7338 | 3.5316 | 0.0000 | 2.3503 | 0.0000 | 3.5340 | 0.0000 | 2.3877 | 0.0000 | 1.7860    | 0.0000 | 2.8082 | 0.0000 | 3.8248 | 0.0000 | 1.4475 | 0 |
| 1581 | 189.6 | 0.7842 | 0.3946 | 11.7419 | 3.5316 | 0.0000 | 2.3503 | 0.0000 | 3.5339 | 0.0000 | 2.3877 | 0.0000 | 1.7860    | 0.0000 | 2.8082 | 0.0000 | 3.8247 | 0.0000 | 1.4475 | 0 |
| 1582 | 189.5 | 0.7837 | 0.3948 | 11.7500 | 3.5315 | 0.0000 | 2.3503 | 0.0000 | 3.5339 | 0.0000 | 2.3877 | 0.0000 | 1.7860    | 0.0000 | 2.8083 | 0.0000 | 3.8246 | 0.0000 | 1.4475 | 0 |
| 1583 | 189.4 | 0.7832 | 0.3950 | 11.7580 | 3.5314 | 0.0000 | 2.3502 | 0.0000 | 3.5339 | 0.0000 | 2.3876 | 0.0000 | 1.7860    | 0.0000 | 2.8083 | 0.0000 | 3.8245 | 0.0000 | 1.4475 | 0 |
| 1584 | 189.3 | 0.7827 | 0.3953 | 11.7661 | 3.5313 | 0.0000 | 2.3502 | 0.0000 | 3.5339 | 0.0000 | 2.3876 | 0.0000 | 1.7859    | 0.0000 | 2.8084 | 0.0000 | 3.8244 | 0.0000 | 1.4475 | 0 |
| 1585 | 189.1 | 0.7822 | 0.3955 | 11.7742 | 3.5313 | 0.0000 | 2.3502 | 0.0000 | 3.5338 | 0.0000 | 2.3876 | 0.0000 | 1.7859    | 0.0000 | 2.8084 | 0.0000 | 3.8243 | 0.0000 | 1.4475 | 0 |
| 1586 | 189   | 0.7817 | 0.3957 | 11.7822 | 3.5312 | 0.0000 | 2.3501 | 0.0000 | 3.5338 | 0.0000 | 2.3876 | 0.0000 | 1.7859    | 0.0000 | 2.8084 | 0.0000 | 3.8242 | 0.0000 | 1.4475 | 0 |
| 1587 | 188.9 | 0.7812 | 0.3960 | 11.7903 | 3.5311 | 0.0000 | 2.3501 | 0.0000 | 3.5338 | 0.0000 | 2.3875 | 0.0000 | 1.7859    | 0.0000 | 2.8085 | 0.0000 | 3.8241 | 0.0000 | 1.4475 | 0 |
| 1588 | 188.8 | 0.7808 | 0.3962 | 11.7984 | 3.5311 | 0.0000 | 2.3501 | 0.0000 | 3.5337 | 0.0000 | 2.3875 | 0.0000 | 1.7858    | 0.0000 | 2.8085 | 0.0000 | 3.8240 | 0.0000 | 1.4475 | 0 |
| 1589 | 188.7 | 0.7803 | 0.3965 | 11.8065 | 3.5310 | 0.0000 | 2.3500 | 0.0000 | 3.5337 | 0.0000 | 2.3875 | 0.0000 | 1.7858    | 0.0000 | 2.8085 | 0.0000 | 3.8240 | 0.0000 | 1.4475 | 0 |
| 1590 | 188.5 | 0.7798 | 0.3967 | 11.8146 | 3.5309 | 0.0000 | 2.3500 | 0.0000 | 3.5337 | 0.0000 | 2.3875 | 0.0000 | 1.7858    | 0.0000 | 2.8086 | 0.0000 | 3.8239 | 0.0000 | 1.4475 | 0 |
| 1591 | 188.4 | 0.7793 | 0.3969 | 11.8226 | 3.5308 | 0.0000 | 2.3500 | 0.0000 | 3.5336 | 0.0000 | 2.3875 | 0.0000 | 1.7858    | 0.0000 | 2.8086 | 0.0000 | 3.8238 | 0.0000 | 1.4475 | 0 |
| 1592 | 188.3 | 0.7788 | 0.3972 | 11.8307 | 3.5308 | 0.0000 | 2.3499 | 0.0000 | 3.5336 | 0.0000 | 2.3874 | 0.0000 | 1.7857    | 0.0000 | 2.8086 | 0.0000 | 3.8237 | 0.0000 | 1.4475 | 0 |
| 1593 | 188.2 | 0.7783 | 0.3974 | 11.8388 | 3.5307 | 0.0000 | 2.3499 | 0.0000 | 3.5336 | 0.0000 | 2.3874 | 0.0000 | 1.7857    | 0.0000 | 2.8087 | 0.0000 | 3.8236 | 0.0000 | 1.4475 | 0 |
| 1594 | 188.1 | 0.7778 | 0.3977 | 11.8469 | 3.5306 | 0.0000 | 2.3499 | 0.0000 | 3.5335 | 0.0000 | 2.3874 | 0.0000 | 1.7857    | 0.0000 | 2.8087 | 0.0000 | 3.8235 | 0.0000 | 1.4475 | 0 |
| 1595 | 188   | 0.7773 | 0.3979 | 11.8550 | 3.5306 | 0.0000 | 2.3498 | 0.0000 | 3.5335 | 0.0000 | 2.3874 | 0.0000 | 1.7857    | 0.0000 | 2.8087 | 0.0000 | 3.8234 | 0.0000 | 1.4475 | 0 |
| 1596 | 187.8 | 0.7768 | 0.3982 | 11.8630 | 3.5305 | 0.0000 | 2.3498 | 0.0000 | 3.5335 | 0.0000 | 2.3874 | 0.0000 | 1.7857    | 0.0000 | 2.8088 | 0.0000 | 3.8233 | 0.0000 | 1.4475 | 0 |
| 1597 | 187.7 | 0.7764 | 0.3984 | 11.8711 | 3.5304 | 0.0000 | 2.3498 | 0.0000 | 3.5334 | 0.0000 | 2.3873 | 0.0000 | 1.7856    | 0.0000 | 2.8088 | 0.0000 | 3.8232 | 0.0000 | 1.4475 | 0 |
| 1598 | 187.6 | 0.7759 | 0.3986 | 11.8792 | 3.5304 | 0.0000 | 2.3497 | 0.0000 | 3.5334 | 0.0000 | 2.3873 | 0.0000 | 1.7856    | 0.0000 | 2.8089 | 0.0000 | 3.8232 | 0.0000 | 1.4475 | 0 |
| 1599 | 187.5 | 0.7754 | 0.3989 | 11.8873 | 3.5303 | 0.0000 | 2.3497 | 0.0000 | 3.5334 | 0.0000 | 2.3873 | 0.0000 | 1.7856    | 0.0000 | 2.8089 | 0.0000 | 3.8231 | 0.0000 | 1.4475 | 0 |
| 1600 | 187.4 | 0.7749 | 0.3991 | 11.8954 | 3.5302 | 0.0000 | 2.3497 | 0.0000 | 3.5333 | 0.0000 | 2.3873 | 0.0000 | 1.7856    | 0.0000 | 2.8089 | 0.0000 | 3.8230 | 0.0000 | 1.4475 | 0 |
| 1601 | 187.3 | 0.7744 | 0.3994 | 11.9035 | 3.5301 | 0.0000 | 2.3497 | 0.0000 | 3.5333 | 0.0000 | 2.3873 | 0.0000 | 1.7855    | 0.0000 | 2.8090 | 0.0000 | 3.8229 | 0.0000 | 1.4475 | 0 |
| 1602 | 187.1 | 0.7739 | 0.3996 | 11.9115 | 3.5301 | 0.0000 | 2.3496 | 0.0000 | 3.5333 | 0.0000 | 2.3872 | 0.0000 | 1.7855    | 0.0000 | 2.8090 | 0.0000 | 3.8228 | 0.0000 | 1.4475 | 0 |
| 1603 | 187   | 0.7735 | 0.3998 | 11.9196 | 3.5300 | 0.0000 | 2.3496 | 0.0000 | 3.5333 | 0.0000 | 2.3872 | 0.0000 | 1.7855    | 0.0000 | 2.8090 | 0.0000 | 3.8227 | 0.0000 | 1.4475 | 0 |
| 1604 | 186.9 | 0.7730 | 0.4001 | 11.9277 | 3.5299 | 0.0000 | 2.3496 | 0.0000 | 3.5332 | 0.0000 | 2.3872 | 0.0000 | 1.7855    | 0.0000 | 2.8091 | 0.0000 | 3.8226 | 0.0000 | 1.4475 | 0 |
| 1605 | 186.8 | 0.7725 | 0.4003 | 11.9358 | 3.5299 | 0.0000 | 2.3495 | 0.0000 | 3.5332 | 0.0000 | 2.3872 | 0.0000 | 1.7854    | 0.0000 | 2.8091 | 0.0000 | 3.8225 | 0.0000 | 1.4475 | 0 |
| 1606 | 186.7 | 0.7720 | 0.4006 | 11.9439 | 3.5298 | 0.0000 | 2.3495 | 0.0000 | 3.5332 | 0.0000 | 2.3871 | 0.0000 | 1.7854    | 0.0000 | 2.8092 | 0.0000 | 3.8225 | 0.0000 | 1.4475 | 0 |
| 1607 | 186.6 | 0.7715 | 0.4008 | 11.9520 | 3.5297 | 0.0000 | 2.3495 | 0.0000 | 3.5331 | 0.0000 | 2.3871 | 0.0000 | 1.7854    | 0.0000 | 2.8092 | 0.0000 | 3.8224 | 0.0000 | 1.4475 | 0 |

| nm   | THz   | eV     | Ag     |         | cSi    |        | Fe2O3  |        | GaAs   |        | TiO2   |        | P3HT:PCBM |        | CdTe   |        | aSi    |        | SiO2   |   |
|------|-------|--------|--------|---------|--------|--------|--------|--------|--------|--------|--------|--------|-----------|--------|--------|--------|--------|--------|--------|---|
|      |       |        | n      | k       | n      | k      | n      | k      | n      | k      | n      | k      | n         | k      | n      | k      | n      | k      | n      | k |
| 1608 | 186.4 | 0.7710 | 0.4011 | 11.9601 | 3.5297 | 0.0000 | 2.3494 | 0.0000 | 3.5331 | 0.0000 | 2.3871 | 0.0000 | 1.7854    | 0.0000 | 2.8092 | 0.0000 | 3.8223 | 0.0000 | 1.4475 | 0 |
| 1609 | 186.3 | 0.7706 | 0.4013 | 11.9682 | 3.5296 | 0.0000 | 2.3494 | 0.0000 | 3.5331 | 0.0000 | 2.3871 | 0.0000 | 1.7854    | 0.0000 | 2.8093 | 0.0000 | 3.8222 | 0.0000 | 1.4475 | 0 |
| 1610 | 186.2 | 0.7701 | 0.4015 | 11.9763 | 3.5295 | 0.0000 | 2.3494 | 0.0000 | 3.5330 | 0.0000 | 2.3871 | 0.0000 | 1.7853    | 0.0000 | 2.8093 | 0.0000 | 3.8221 | 0.0000 | 1.4475 | 0 |
| 1611 | 186.1 | 0.7696 | 0.4018 | 11.9844 | 3.5295 | 0.0000 | 2.3493 | 0.0000 | 3.5330 | 0.0000 | 2.3870 | 0.0000 | 1.7853    | 0.0000 | 2.8093 | 0.0000 | 3.8220 | 0.0000 | 1.4475 | 0 |
| 1612 | 186   | 0.7691 | 0.4020 | 11.9925 | 3.5294 | 0.0000 | 2.3493 | 0.0000 | 3.5330 | 0.0000 | 2.3870 | 0.0000 | 1.7853    | 0.0000 | 2.8094 | 0.0000 | 3.8220 | 0.0000 | 1.4475 | 0 |
| 1613 | 185.9 | 0.7687 | 0.4023 | 12.0006 | 3.5293 | 0.0000 | 2.3493 | 0.0000 | 3.5330 | 0.0000 | 2.3870 | 0.0000 | 1.7853    | 0.0000 | 2.8094 | 0.0000 | 3.8219 | 0.0000 | 1.4475 | 0 |
| 1614 | 185.7 | 0.7682 | 0.4025 | 12.0087 | 3.5293 | 0.0000 | 2.3493 | 0.0000 | 3.5329 | 0.0000 | 2.3870 | 0.0000 | 1.7852    | 0.0000 | 2.8095 | 0.0000 | 3.8218 | 0.0000 | 1.4475 | 0 |
| 1615 | 185.6 | 0.7677 | 0.4028 | 12.0168 | 3.5292 | 0.0000 | 2.3492 | 0.0000 | 3.5329 | 0.0000 | 2.3870 | 0.0000 | 1.7852    | 0.0000 | 2.8095 | 0.0000 | 3.8217 | 0.0000 | 1.4475 | 0 |
| 1616 | 185.5 | 0.7672 | 0.4030 | 12.0249 | 3.5291 | 0.0000 | 2.3492 | 0.0000 | 3.5329 | 0.0000 | 2.3869 | 0.0000 | 1.7852    | 0.0000 | 2.8095 | 0.0000 | 3.8216 | 0.0000 | 1.4475 | 0 |
| 1617 | 185.4 | 0.7668 | 0.4033 | 12.0330 | 3.5290 | 0.0000 | 2.3492 | 0.0000 | 3.5328 | 0.0000 | 2.3869 | 0.0000 | 1.7852    | 0.0000 | 2.8096 | 0.0000 | 3.8215 | 0.0000 | 1.4475 | 0 |
| 1618 | 185.3 | 0.7663 | 0.4035 | 12.0411 | 3.5290 | 0.0000 | 2.3491 | 0.0000 | 3.5328 | 0.0000 | 2.3869 | 0.0000 | 1.7852    | 0.0000 | 2.8096 | 0.0000 | 3.8214 | 0.0000 | 1.4475 | 0 |
| 1619 | 185.2 | 0.7658 | 0.4038 | 12.0492 | 3.5289 | 0.0000 | 2.3491 | 0.0000 | 3.5328 | 0.0000 | 2.3869 | 0.0000 | 1.7851    | 0.0000 | 2.8097 | 0.0000 | 3.8214 | 0.0000 | 1.4475 | 0 |
| 1620 | 185.1 | 0.7653 | 0.4040 | 12.0573 | 3.5288 | 0.0000 | 2.3491 | 0.0000 | 3.5327 | 0.0000 | 2.3869 | 0.0000 | 1.7851    | 0.0000 | 2.8097 | 0.0000 | 3.8213 | 0.0000 | 1.4475 | 0 |
| 1621 | 184.9 | 0.7649 | 0.4042 | 12.0654 | 3.5288 | 0.0000 | 2.3490 | 0.0000 | 3.5327 | 0.0000 | 2.3868 | 0.0000 | 1.7851    | 0.0000 | 2.8097 | 0.0000 | 3.8212 | 0.0000 | 1.4474 | 0 |
| 1622 | 184.8 | 0.7644 | 0.4045 | 12.0735 | 3.5287 | 0.0000 | 2.3490 | 0.0000 | 3.5327 | 0.0000 | 2.3868 | 0.0000 | 1.7851    | 0.0000 | 2.8098 | 0.0000 | 3.8211 | 0.0000 | 1.4474 | 0 |
| 1623 | 184.7 | 0.7639 | 0.4047 | 12.0816 | 3.5286 | 0.0000 | 2.3490 | 0.0000 | 3.5327 | 0.0000 | 2.3868 | 0.0000 | 1.7850    | 0.0000 | 2.8098 | 0.0000 | 3.8210 | 0.0000 | 1.4474 | 0 |
| 1624 | 184.6 | 0.7634 | 0.4050 | 12.0897 | 3.5286 | 0.0000 | 2.3490 | 0.0000 | 3.5326 | 0.0000 | 2.3868 | 0.0000 | 1.7850    | 0.0000 | 2.8099 | 0.0000 | 3.8209 | 0.0000 | 1.4474 | 0 |
| 1625 | 184.5 | 0.7630 | 0.4052 | 12.0978 | 3.5285 | 0.0000 | 2.3489 | 0.0000 | 3.5326 | 0.0000 | 2.3868 | 0.0000 | 1.7850    | 0.0000 | 2.8099 | 0.0000 | 3.8209 | 0.0000 | 1.4474 | 0 |
| 1626 | 184.4 | 0.7625 | 0.4055 | 12.1059 | 3.5284 | 0.0000 | 2.3489 | 0.0000 | 3.5326 | 0.0000 | 2.3867 | 0.0000 | 1.7850    | 0.0000 | 2.8099 | 0.0000 | 3.8208 | 0.0000 | 1.4474 | 0 |
| 1627 | 184.3 | 0.7620 | 0.4057 | 12.1140 | 3.5284 | 0.0000 | 2.3489 | 0.0000 | 3.5325 | 0.0000 | 2.3867 | 0.0000 | 1.7850    | 0.0000 | 2.8100 | 0.0000 | 3.8207 | 0.0000 | 1.4474 | 0 |
| 1628 | 184.1 | 0.7616 | 0.4060 | 12.1221 | 3.5283 | 0.0000 | 2.3488 | 0.0000 | 3.5325 | 0.0000 | 2.3867 | 0.0000 | 1.7849    | 0.0000 | 2.8100 | 0.0000 | 3.8206 | 0.0000 | 1.4474 | 0 |
| 1629 | 184   | 0.7611 | 0.4062 | 12.1302 | 3.5283 | 0.0000 | 2.3488 | 0.0000 | 3.5325 | 0.0000 | 2.3867 | 0.0000 | 1.7849    | 0.0000 | 2.8101 | 0.0000 | 3.8205 | 0.0000 | 1.4474 | 0 |
| 1630 | 183.9 | 0.7606 | 0.4065 | 12.1383 | 3.5282 | 0.0000 | 2.3488 | 0.0000 | 3.5325 | 0.0000 | 2.3867 | 0.0000 | 1.7849    | 0.0000 | 2.8101 | 0.0000 | 3.8205 | 0.0000 | 1.4474 | 0 |
| 1631 | 183.8 | 0.7602 | 0.4067 | 12.1465 | 3.5281 | 0.0000 | 2.3488 | 0.0000 | 3.5324 | 0.0000 | 2.3866 | 0.0000 | 1.7849    | 0.0000 | 2.8101 | 0.0000 | 3.8204 | 0.0000 | 1.4474 | 0 |
| 1632 | 183.7 | 0.7597 | 0.4070 | 12.1546 | 3.5281 | 0.0000 | 2.3487 | 0.0000 | 3.5324 | 0.0000 | 2.3866 | 0.0000 | 1.7849    | 0.0000 | 2.8102 | 0.0000 | 3.8203 | 0.0000 | 1.4474 | 0 |
| 1633 | 183.6 | 0.7592 | 0.4072 | 12.1627 | 3.5280 | 0.0000 | 2.3487 | 0.0000 | 3.5324 | 0.0000 | 2.3866 | 0.0000 | 1.7848    | 0.0000 | 2.8102 | 0.0000 | 3.8202 | 0.0000 | 1.4474 | 0 |
| 1634 | 183.5 | 0.7588 | 0.4075 | 12.1708 | 3.5279 | 0.0000 | 2.3487 | 0.0000 | 3.5323 | 0.0000 | 2.3866 | 0.0000 | 1.7848    | 0.0000 | 2.8103 | 0.0000 | 3.8201 | 0.0000 | 1.4474 | 0 |
| 1635 | 183.4 | 0.7583 | 0.4077 | 12.1789 | 3.5279 | 0.0000 | 2.3486 | 0.0000 | 3.5323 | 0.0000 | 2.3866 | 0.0000 | 1.7848    | 0.0000 | 2.8103 | 0.0000 | 3.8200 | 0.0000 | 1.4474 | 0 |
| 1636 | 183.2 | 0.7578 | 0.4080 | 12.1870 | 3.5278 | 0.0000 | 2.3486 | 0.0000 | 3.5323 | 0.0000 | 2.3865 | 0.0000 | 1.7848    | 0.0000 | 2.8103 | 0.0000 | 3.8200 | 0.0000 | 1.4474 | 0 |
| 1637 | 183.1 | 0.7574 | 0.4082 | 12.1952 | 3.5277 | 0.0000 | 2.3486 | 0.0000 | 3.5323 | 0.0000 | 2.3865 | 0.0000 | 1.7848    | 0.0000 | 2.8104 | 0.0000 | 3.8199 | 0.0000 | 1.4474 | 0 |
| 1638 | 183   | 0.7569 | 0.4085 | 12.2033 | 3.5277 | 0.0000 | 2.3486 | 0.0000 | 3.5322 | 0.0000 | 2.3865 | 0.0000 | 1.7847    | 0.0000 | 2.8104 | 0.0000 | 3.8198 | 0.0000 | 1.4474 | 0 |
| 1639 | 182.9 | 0.7565 | 0.4087 | 12.2114 | 3.5276 | 0.0000 | 2.3485 | 0.0000 | 3.5322 | 0.0000 | 2.3865 | 0.0000 | 1.7847    | 0.0000 | 2.8105 | 0.0000 | 3.8197 | 0.0000 | 1.4474 | 0 |

| nm   | THz   | eV     | Ag     |         | cSi    |        | Fe2O3  |        | GaAs   |        | TiO2   |        | P3HT:PCBM |        | CdTe   |        | aSi    |        | SiO2   |   |
|------|-------|--------|--------|---------|--------|--------|--------|--------|--------|--------|--------|--------|-----------|--------|--------|--------|--------|--------|--------|---|
|      |       |        | n      | k       | n      | k      | n      | k      | n      | k      | n      | k      | n         | k      | n      | k      | n      | k      | n      | k |
| 1640 | 182.8 | 0.7560 | 0.4090 | 12.2195 | 3.5275 | 0.0000 | 2.3485 | 0.0000 | 3.5322 | 0.0000 | 2.3865 | 0.0000 | 1.7847    | 0.0000 | 2.8105 | 0.0000 | 3.8196 | 0.0000 | 1.4474 | 0 |
| 1641 | 182.7 | 0.7555 | 0.4092 | 12.2276 | 3.5275 | 0.0000 | 2.3485 | 0.0000 | 3.5321 | 0.0000 | 2.3864 | 0.0000 | 1.7847    | 0.0000 | 2.8106 | 0.0000 | 3.8196 | 0.0000 | 1.4474 | 0 |
| 1642 | 182.6 | 0.7551 | 0.4095 | 12.2358 | 3.5274 | 0.0000 | 2.3484 | 0.0000 | 3.5321 | 0.0000 | 2.3864 | 0.0000 | 1.7846    | 0.0000 | 2.8106 | 0.0000 | 3.8195 | 0.0000 | 1.4474 | 0 |
| 1643 | 182.5 | 0.7546 | 0.4097 | 12.2439 | 3.5273 | 0.0000 | 2.3484 | 0.0000 | 3.5321 | 0.0000 | 2.3864 | 0.0000 | 1.7846    | 0.0000 | 2.8106 | 0.0000 | 3.8194 | 0.0000 | 1.4474 | 0 |
| 1644 | 182.4 | 0.7542 | 0.4100 | 12.2520 | 3.5273 | 0.0000 | 2.3484 | 0.0000 | 3.5321 | 0.0000 | 2.3864 | 0.0000 | 1.7846    | 0.0000 | 2.8107 | 0.0000 | 3.8193 | 0.0000 | 1.4474 | 0 |
| 1645 | 182.2 | 0.7537 | 0.4102 | 12.2601 | 3.5272 | 0.0000 | 2.3484 | 0.0000 | 3.5320 | 0.0000 | 2.3864 | 0.0000 | 1.7846    | 0.0000 | 2.8107 | 0.0000 | 3.8192 | 0.0000 | 1.4474 | 0 |
| 1646 | 182.1 | 0.7532 | 0.4105 | 12.2683 | 3.5272 | 0.0000 | 2.3483 | 0.0000 | 3.5320 | 0.0000 | 2.3863 | 0.0000 | 1.7846    | 0.0000 | 2.8108 | 0.0000 | 3.8192 | 0.0000 | 1.4474 | 0 |
| 1647 | 182   | 0.7528 | 0.4107 | 12.2764 | 3.5271 | 0.0000 | 2.3483 | 0.0000 | 3.5320 | 0.0000 | 2.3863 | 0.0000 | 1.7845    | 0.0000 | 2.8108 | 0.0000 | 3.8191 | 0.0000 | 1.4474 | 0 |
| 1648 | 181.9 | 0.7523 | 0.4110 | 12.2845 | 3.5270 | 0.0000 | 2.3483 | 0.0000 | 3.5320 | 0.0000 | 2.3863 | 0.0000 | 1.7845    | 0.0000 | 2.8108 | 0.0000 | 3.8190 | 0.0000 | 1.4474 | 0 |
| 1649 | 181.8 | 0.7519 | 0.4112 | 12.2926 | 3.5270 | 0.0000 | 2.3482 | 0.0000 | 3.5319 | 0.0000 | 2.3863 | 0.0000 | 1.7845    | 0.0000 | 2.8109 | 0.0000 | 3.8189 | 0.0000 | 1.4474 | 0 |
| 1650 | 181.7 | 0.7514 | 0.4115 | 12.3008 | 3.5269 | 0.0000 | 2.3482 | 0.0000 | 3.5319 | 0.0000 | 2.3863 | 0.0000 | 1.7845    | 0.0000 | 2.8109 | 0.0000 | 3.8189 | 0.0000 | 1.4474 | 0 |
| 1651 | 181.6 | 0.7510 | 0.4117 | 12.3089 | 3.5268 | 0.0000 | 2.3482 | 0.0000 | 3.5319 | 0.0000 | 2.3862 | 0.0000 | 1.7845    | 0.0000 | 2.8110 | 0.0000 | 3.8188 | 0.0000 | 1.4474 | 0 |
| 1652 | 181.5 | 0.7505 | 0.4120 | 12.3170 | 3.5268 | 0.0000 | 2.3482 | 0.0000 | 3.5318 | 0.0000 | 2.3862 | 0.0000 | 1.7844    | 0.0000 | 2.8110 | 0.0000 | 3.8187 | 0.0000 | 1.4474 | 0 |
| 1653 | 181.4 | 0.7501 | 0.4122 | 12.3252 | 3.5267 | 0.0000 | 2.3481 | 0.0000 | 3.5318 | 0.0000 | 2.3862 | 0.0000 | 1.7844    | 0.0000 | 2.8111 | 0.0000 | 3.8186 | 0.0000 | 1.4474 | 0 |
| 1654 | 181.3 | 0.7496 | 0.4125 | 12.3333 | 3.5266 | 0.0000 | 2.3481 | 0.0000 | 3.5318 | 0.0000 | 2.3862 | 0.0000 | 1.7844    | 0.0000 | 2.8111 | 0.0000 | 3.8185 | 0.0000 | 1.4474 | 0 |
| 1655 | 181.1 | 0.7491 | 0.4127 | 12.3414 | 3.5266 | 0.0000 | 2.3481 | 0.0000 | 3.5318 | 0.0000 | 2.3862 | 0.0000 | 1.7844    | 0.0000 | 2.8111 | 0.0000 | 3.8185 | 0.0000 | 1.4474 | 0 |
| 1656 | 181   | 0.7487 | 0.4130 | 12.3496 | 3.5265 | 0.0000 | 2.3481 | 0.0000 | 3.5317 | 0.0000 | 2.3861 | 0.0000 | 1.7844    | 0.0000 | 2.8112 | 0.0000 | 3.8184 | 0.0000 | 1.4474 | 0 |
| 1657 | 180.9 | 0.7482 | 0.4132 | 12.3577 | 3.5265 | 0.0000 | 2.3480 | 0.0000 | 3.5317 | 0.0000 | 2.3861 | 0.0000 | 1.7843    | 0.0000 | 2.8112 | 0.0000 | 3.8183 | 0.0000 | 1.4474 | 0 |
| 1658 | 180.8 | 0.7478 | 0.4135 | 12.3658 | 3.5264 | 0.0000 | 2.3480 | 0.0000 | 3.5317 | 0.0000 | 2.3861 | 0.0000 | 1.7843    | 0.0000 | 2.8113 | 0.0000 | 3.8182 | 0.0000 | 1.4474 | 0 |
| 1659 | 180.7 | 0.7473 | 0.4137 | 12.3740 | 3.5263 | 0.0000 | 2.3480 | 0.0000 | 3.5317 | 0.0000 | 2.3861 | 0.0000 | 1.7843    | 0.0000 | 2.8113 | 0.0000 | 3.8182 | 0.0000 | 1.4474 | 0 |
| 1660 | 180.6 | 0.7469 | 0.4140 | 12.3821 | 3.5263 | 0.0000 | 2.3479 | 0.0000 | 3.5316 | 0.0000 | 2.3861 | 0.0000 | 1.7843    | 0.0000 | 2.8114 | 0.0000 | 3.8181 | 0.0000 | 1.4474 | 0 |
| 1661 | 180.5 | 0.7464 | 0.4142 | 12.3902 | 3.5262 | 0.0000 | 2.3479 | 0.0000 | 3.5316 | 0.0000 | 2.3861 | 0.0000 | 1.7843    | 0.0000 | 2.8114 | 0.0000 | 3.8180 | 0.0000 | 1.4474 | 0 |
| 1662 | 180.4 | 0.7460 | 0.4145 | 12.3984 | 3.5261 | 0.0000 | 2.3479 | 0.0000 | 3.5316 | 0.0000 | 2.3860 | 0.0000 | 1.7842    | 0.0000 | 2.8115 | 0.0000 | 3.8179 | 0.0000 | 1.4474 | 0 |
| 1663 | 180.3 | 0.7455 | 0.4148 | 12.4065 | 3.5261 | 0.0000 | 2.3479 | 0.0000 | 3.5315 | 0.0000 | 2.3860 | 0.0000 | 1.7842    | 0.0000 | 2.8115 | 0.0000 | 3.8179 | 0.0000 | 1.4474 | 0 |
| 1664 | 180.2 | 0.7451 | 0.4150 | 12.4147 | 3.5260 | 0.0000 | 2.3478 | 0.0000 | 3.5315 | 0.0000 | 2.3860 | 0.0000 | 1.7842    | 0.0000 | 2.8115 | 0.0000 | 3.8178 | 0.0000 | 1.4474 | 0 |
| 1665 | 180.1 | 0.7446 | 0.4153 | 12.4228 | 3.5260 | 0.0000 | 2.3478 | 0.0000 | 3.5315 | 0.0000 | 2.3860 | 0.0000 | 1.7842    | 0.0000 | 2.8116 | 0.0000 | 3.8177 | 0.0000 | 1.4474 | 0 |
| 1666 | 179.9 | 0.7442 | 0.4155 | 12.4310 | 3.5259 | 0.0000 | 2.3478 | 0.0000 | 3.5315 | 0.0000 | 2.3860 | 0.0000 | 1.7842    | 0.0000 | 2.8116 | 0.0000 | 3.8176 | 0.0000 | 1.4474 | 0 |
| 1667 | 179.8 | 0.7438 | 0.4158 | 12.4391 | 3.5258 | 0.0000 | 2.3478 | 0.0000 | 3.5314 | 0.0000 | 2.3859 | 0.0000 | 1.7841    | 0.0000 | 2.8117 | 0.0000 | 3.8176 | 0.0000 | 1.4474 | 0 |
| 1668 | 179.7 | 0.7433 | 0.4160 | 12.4472 | 3.5258 | 0.0000 | 2.3477 | 0.0000 | 3.5314 | 0.0000 | 2.3859 | 0.0000 | 1.7841    | 0.0000 | 2.8117 | 0.0000 | 3.8175 | 0.0000 | 1.4474 | 0 |
| 1669 | 179.6 | 0.7429 | 0.4163 | 12.4554 | 3.5257 | 0.0000 | 2.3477 | 0.0000 | 3.5314 | 0.0000 | 2.3859 | 0.0000 | 1.7841    | 0.0000 | 2.8118 | 0.0000 | 3.8174 | 0.0000 | 1.4474 | 0 |
| 1670 | 179.5 | 0.7424 | 0.4165 | 12.4635 | 3.5257 | 0.0000 | 2.3477 | 0.0000 | 3.5314 | 0.0000 | 2.3859 | 0.0000 | 1.7841    | 0.0000 | 2.8118 | 0.0000 | 3.8173 | 0.0000 | 1.4474 | 0 |
| 1671 | 179.4 | 0.7420 | 0.4168 | 12.4717 | 3.5256 | 0.0000 | 2.3477 | 0.0000 | 3.5313 | 0.0000 | 2.3859 | 0.0000 | 1.7841    | 0.0000 | 2.8119 | 0.0000 | 3.8173 | 0.0000 | 1.4474 | 0 |

| nm   | THz   | eV     | Ag     |         | cSi    |        | Fe2O3  |        | GaAs   |        | TiO2   |        | P3HT:PCBM |        | CdTe   |        | aSi    |        | SiO2   |   |
|------|-------|--------|--------|---------|--------|--------|--------|--------|--------|--------|--------|--------|-----------|--------|--------|--------|--------|--------|--------|---|
|      |       |        | n      | k       | n      | k      | n      | k      | n      | k      | n      | k      | n         | k      | n      | k      | n      | k      | n      | k |
| 1672 | 179.3 | 0.7415 | 0.4170 | 12.4798 | 3.5255 | 0.0000 | 2.3476 | 0.0000 | 3.5313 | 0.0000 | 2.3858 | 0.0000 | 1.7840    | 0.0000 | 2.8119 | 0.0000 | 3.8172 | 0.0000 | 1.4474 | 0 |
| 1673 | 179.2 | 0.7411 | 0.4173 | 12.4880 | 3.5255 | 0.0000 | 2.3476 | 0.0000 | 3.5313 | 0.0000 | 2.3858 | 0.0000 | 1.7840    | 0.0000 | 2.8119 | 0.0000 | 3.8171 | 0.0000 | 1.4474 | 0 |
| 1674 | 179.1 | 0.7406 | 0.4176 | 12.4961 | 3.5254 | 0.0000 | 2.3476 | 0.0000 | 3.5313 | 0.0000 | 2.3858 | 0.0000 | 1.7840    | 0.0000 | 2.8120 | 0.0000 | 3.8170 | 0.0000 | 1.4474 | 0 |
| 1675 | 179   | 0.7402 | 0.4178 | 12.5043 | 3.5254 | 0.0000 | 2.3475 | 0.0000 | 3.5312 | 0.0000 | 2.3858 | 0.0000 | 1.7840    | 0.0000 | 2.8120 | 0.0000 | 3.8170 | 0.0000 | 1.4474 | 0 |
| 1676 | 178.9 | 0.7398 | 0.4181 | 12.5124 | 3.5253 | 0.0000 | 2.3475 | 0.0000 | 3.5312 | 0.0000 | 2.3858 | 0.0000 | 1.7840    | 0.0000 | 2.8121 | 0.0000 | 3.8169 | 0.0000 | 1.4474 | 0 |
| 1677 | 178.8 | 0.7393 | 0.4183 | 12.5206 | 3.5252 | 0.0000 | 2.3475 | 0.0000 | 3.5312 | 0.0000 | 2.3858 | 0.0000 | 1.7839    | 0.0000 | 2.8121 | 0.0000 | 3.8168 | 0.0000 | 1.4474 | 0 |
| 1678 | 178.7 | 0.7389 | 0.4186 | 12.5287 | 3.5252 | 0.0000 | 2.3475 | 0.0000 | 3.5312 | 0.0000 | 2.3857 | 0.0000 | 1.7839    | 0.0000 | 2.8122 | 0.0000 | 3.8167 | 0.0000 | 1.4474 | 0 |
| 1679 | 178.6 | 0.7384 | 0.4188 | 12.5369 | 3.5251 | 0.0000 | 2.3474 | 0.0000 | 3.5311 | 0.0000 | 2.3857 | 0.0000 | 1.7839    | 0.0000 | 2.8122 | 0.0000 | 3.8167 | 0.0000 | 1.4474 | 0 |
| 1680 | 178.4 | 0.7380 | 0.4191 | 12.5451 | 3.5251 | 0.0000 | 2.3474 | 0.0000 | 3.5311 | 0.0000 | 2.3857 | 0.0000 | 1.7839    | 0.0000 | 2.8123 | 0.0000 | 3.8166 | 0.0000 | 1.4474 | 0 |
| 1681 | 178.3 | 0.7376 | 0.4194 | 12.5532 | 3.5250 | 0.0000 | 2.3474 | 0.0000 | 3.5311 | 0.0000 | 2.3857 | 0.0000 | 1.7839    | 0.0000 | 2.8123 | 0.0000 | 3.8165 | 0.0000 | 1.4474 | 0 |
| 1682 | 178.2 | 0.7371 | 0.4196 | 12.5614 | 3.5249 | 0.0000 | 2.3474 | 0.0000 | 3.5310 | 0.0000 | 2.3857 | 0.0000 | 1.7839    | 0.0000 | 2.8124 | 0.0000 | 3.8164 | 0.0000 | 1.4474 | 0 |
| 1683 | 178.1 | 0.7367 | 0.4199 | 12.5695 | 3.5249 | 0.0000 | 2.3473 | 0.0000 | 3.5310 | 0.0000 | 2.3856 | 0.0000 | 1.7838    | 0.0000 | 2.8124 | 0.0000 | 3.8164 | 0.0000 | 1.4474 | 0 |
| 1684 | 178   | 0.7362 | 0.4201 | 12.5777 | 3.5248 | 0.0000 | 2.3473 | 0.0000 | 3.5310 | 0.0000 | 2.3856 | 0.0000 | 1.7838    | 0.0000 | 2.8125 | 0.0000 | 3.8163 | 0.0000 | 1.4474 | 0 |
| 1685 | 177.9 | 0.7358 | 0.4204 | 12.5859 | 3.5248 | 0.0000 | 2.3473 | 0.0000 | 3.5310 | 0.0000 | 2.3856 | 0.0000 | 1.7838    | 0.0000 | 2.8125 | 0.0000 | 3.8162 | 0.0000 | 1.4474 | 0 |
| 1686 | 177.8 | 0.7354 | 0.4207 | 12.5940 | 3.5247 | 0.0000 | 2.3473 | 0.0000 | 3.5309 | 0.0000 | 2.3856 | 0.0000 | 1.7838    | 0.0000 | 2.8125 | 0.0000 | 3.8162 | 0.0000 | 1.4474 | 0 |
| 1687 | 177.7 | 0.7349 | 0.4209 | 12.6022 | 3.5246 | 0.0000 | 2.3472 | 0.0000 | 3.5309 | 0.0000 | 2.3856 | 0.0000 | 1.7838    | 0.0000 | 2.8126 | 0.0000 | 3.8161 | 0.0000 | 1.4474 | 0 |
| 1688 | 177.6 | 0.7345 | 0.4212 | 12.6103 | 3.5246 | 0.0000 | 2.3472 | 0.0000 | 3.5309 | 0.0000 | 2.3856 | 0.0000 | 1.7837    | 0.0000 | 2.8126 | 0.0000 | 3.8160 | 0.0000 | 1.4474 | 0 |
| 1689 | 177.5 | 0.7341 | 0.4214 | 12.6185 | 3.5245 | 0.0000 | 2.3472 | 0.0000 | 3.5309 | 0.0000 | 2.3855 | 0.0000 | 1.7837    | 0.0000 | 2.8127 | 0.0000 | 3.8159 | 0.0000 | 1.4474 | 0 |
| 1690 | 177.4 | 0.7336 | 0.4217 | 12.6267 | 3.5245 | 0.0000 | 2.3472 | 0.0000 | 3.5308 | 0.0000 | 2.3855 | 0.0000 | 1.7837    | 0.0000 | 2.8127 | 0.0000 | 3.8159 | 0.0000 | 1.4473 | 0 |
| 1691 | 177.3 | 0.7332 | 0.4220 | 12.6348 | 3.5244 | 0.0000 | 2.3471 | 0.0000 | 3.5308 | 0.0000 | 2.3855 | 0.0000 | 1.7837    | 0.0000 | 2.8128 | 0.0000 | 3.8158 | 0.0000 | 1.4473 | 0 |
| 1692 | 177.2 | 0.7328 | 0.4222 | 12.6430 | 3.5243 | 0.0000 | 2.3471 | 0.0000 | 3.5308 | 0.0000 | 2.3855 | 0.0000 | 1.7837    | 0.0000 | 2.8128 | 0.0000 | 3.8157 | 0.0000 | 1.4473 | 0 |
| 1693 | 177.1 | 0.7323 | 0.4225 | 12.6512 | 3.5243 | 0.0000 | 2.3471 | 0.0000 | 3.5308 | 0.0000 | 2.3855 | 0.0000 | 1.7836    | 0.0000 | 2.8129 | 0.0000 | 3.8157 | 0.0000 | 1.4473 | 0 |
| 1694 | 177   | 0.7319 | 0.4227 | 12.6593 | 3.5242 | 0.0000 | 2.3471 | 0.0000 | 3.5307 | 0.0000 | 2.3855 | 0.0000 | 1.7836    | 0.0000 | 2.8129 | 0.0000 | 3.8156 | 0.0000 | 1.4473 | 0 |
| 1695 | 176.9 | 0.7315 | 0.4230 | 12.6675 | 3.5242 | 0.0000 | 2.3470 | 0.0000 | 3.5307 | 0.0000 | 2.3854 | 0.0000 | 1.7836    | 0.0000 | 2.8130 | 0.0000 | 3.8155 | 0.0000 | 1.4473 | 0 |
| 1696 | 176.8 | 0.7310 | 0.4233 | 12.6757 | 3.5241 | 0.0000 | 2.3470 | 0.0000 | 3.5307 | 0.0000 | 2.3854 | 0.0000 | 1.7836    | 0.0000 | 2.8130 | 0.0000 | 3.8154 | 0.0000 | 1.4473 | 0 |
| 1697 | 176.7 | 0.7306 | 0.4235 | 12.6839 | 3.5241 | 0.0000 | 2.3470 | 0.0000 | 3.5307 | 0.0000 | 2.3854 | 0.0000 | 1.7836    | 0.0000 | 2.8131 | 0.0000 | 3.8154 | 0.0000 | 1.4473 | 0 |
| 1698 | 176.6 | 0.7302 | 0.4238 | 12.6920 | 3.5240 | 0.0000 | 2.3470 | 0.0000 | 3.5306 | 0.0000 | 2.3854 | 0.0000 | 1.7836    | 0.0000 | 2.8131 | 0.0000 | 3.8153 | 0.0000 | 1.4473 | 0 |
| 1699 | 176.5 | 0.7297 | 0.4240 | 12.7002 | 3.5239 | 0.0000 | 2.3469 | 0.0000 | 3.5306 | 0.0000 | 2.3854 | 0.0000 | 1.7835    | 0.0000 | 2.8132 | 0.0000 | 3.8152 | 0.0000 | 1.4473 | 0 |
| 1700 | 176.3 | 0.7293 | 0.4243 | 12.7084 | 3.5239 | 0.0000 | 2.3469 | 0.0000 | 3.5306 | 0.0000 | 2.3853 | 0.0000 | 1.7835    | 0.0000 | 2.8132 | 0.0000 | 3.8152 | 0.0000 | 1.4473 | 0 |
| 1701 | 176.2 | 0.7289 | 0.4246 | 12.7166 | 3.5238 | 0.0000 | 2.3469 | 0.0000 | 3.5306 | 0.0000 | 2.3853 | 0.0000 | 1.7835    | 0.0000 | 2.8133 | 0.0000 | 3.8151 | 0.0000 | 1.4473 | 0 |
| 1702 | 176.1 | 0.7285 | 0.4248 | 12.7247 | 3.5238 | 0.0000 | 2.3469 | 0.0000 | 3.5305 | 0.0000 | 2.3853 | 0.0000 | 1.7835    | 0.0000 | 2.8133 | 0.0000 | 3.8150 | 0.0000 | 1.4473 | 0 |
| 1703 | 176   | 0.7280 | 0.4251 | 12.7329 | 3.5237 | 0.0000 | 2.3468 | 0.0000 | 3.5305 | 0.0000 | 2.3853 | 0.0000 | 1.7835    | 0.0000 | 2.8134 | 0.0000 | 3.8150 | 0.0000 | 1.4473 | 0 |

| nm   | THz   | eV     | Ag     |         | cSi    |        | Fe2O3  |        | GaAs   |        | TiO2   |        | P3HT:PCBM |        | CdTe   |        | aSi    |        | SiO2   |   |
|------|-------|--------|--------|---------|--------|--------|--------|--------|--------|--------|--------|--------|-----------|--------|--------|--------|--------|--------|--------|---|
|      |       |        | n      | k       | n      | k      | n      | k      | n      | k      | n      | k      | n         | k      | n      | k      | n      | k      | n      | k |
| 1704 | 175.9 | 0.7276 | 0.4253 | 12.7411 | 3.5237 | 0.0000 | 2.3468 | 0.0000 | 3.5305 | 0.0000 | 2.3853 | 0.0000 | 1.7834    | 0.0000 | 2.8134 | 0.0000 | 3.8149 | 0.0000 | 1.4473 | 0 |
| 1705 | 175.8 | 0.7272 | 0.4256 | 12.7493 | 3.5236 | 0.0000 | 2.3468 | 0.0000 | 3.5305 | 0.0000 | 2.3853 | 0.0000 | 1.7834    | 0.0000 | 2.8135 | 0.0000 | 3.8148 | 0.0000 | 1.4473 | 0 |
| 1706 | 175.7 | 0.7268 | 0.4259 | 12.7574 | 3.5235 | 0.0000 | 2.3468 | 0.0000 | 3.5305 | 0.0000 | 2.3852 | 0.0000 | 1.7834    | 0.0000 | 2.8135 | 0.0000 | 3.8147 | 0.0000 | 1.4473 | 0 |
| 1707 | 175.6 | 0.7263 | 0.4261 | 12.7656 | 3.5235 | 0.0000 | 2.3467 | 0.0000 | 3.5304 | 0.0000 | 2.3852 | 0.0000 | 1.7834    | 0.0000 | 2.8136 | 0.0000 | 3.8147 | 0.0000 | 1.4473 | 0 |
| 1708 | 175.5 | 0.7259 | 0.4264 | 12.7738 | 3.5234 | 0.0000 | 2.3467 | 0.0000 | 3.5304 | 0.0000 | 2.3852 | 0.0000 | 1.7834    | 0.0000 | 2.8136 | 0.0000 | 3.8146 | 0.0000 | 1.4473 | 0 |
| 1709 | 175.4 | 0.7255 | 0.4267 | 12.7820 | 3.5234 | 0.0000 | 2.3467 | 0.0000 | 3.5304 | 0.0000 | 2.3852 | 0.0000 | 1.7834    | 0.0000 | 2.8137 | 0.0000 | 3.8145 | 0.0000 | 1.4473 | 0 |
| 1710 | 175.3 | 0.7251 | 0.4269 | 12.7902 | 3.5233 | 0.0000 | 2.3467 | 0.0000 | 3.5304 | 0.0000 | 2.3852 | 0.0000 | 1.7833    | 0.0000 | 2.8137 | 0.0000 | 3.8145 | 0.0000 | 1.4473 | 0 |
| 1711 | 175.2 | 0.7246 | 0.4272 | 12.7984 | 3.5233 | 0.0000 | 2.3466 | 0.0000 | 3.5303 | 0.0000 | 2.3852 | 0.0000 | 1.7833    | 0.0000 | 2.8138 | 0.0000 | 3.8144 | 0.0000 | 1.4473 | 0 |
| 1712 | 175.1 | 0.7242 | 0.4275 | 12.8065 | 3.5232 | 0.0000 | 2.3466 | 0.0000 | 3.5303 | 0.0000 | 2.3851 | 0.0000 | 1.7833    | 0.0000 | 2.8138 | 0.0000 | 3.8143 | 0.0000 | 1.4473 | 0 |
| 1713 | 175   | 0.7238 | 0.4277 | 12.8147 | 3.5231 | 0.0000 | 2.3466 | 0.0000 | 3.5303 | 0.0000 | 2.3851 | 0.0000 | 1.7833    | 0.0000 | 2.8139 | 0.0000 | 3.8143 | 0.0000 | 1.4473 | 0 |
| 1714 | 174.9 | 0.7234 | 0.4280 | 12.8229 | 3.5231 | 0.0000 | 2.3466 | 0.0000 | 3.5303 | 0.0000 | 2.3851 | 0.0000 | 1.7833    | 0.0000 | 2.8139 | 0.0000 | 3.8142 | 0.0000 | 1.4473 | 0 |
| 1715 | 174.8 | 0.7229 | 0.4283 | 12.8311 | 3.5230 | 0.0000 | 2.3466 | 0.0000 | 3.5302 | 0.0000 | 2.3851 | 0.0000 | 1.7832    | 0.0000 | 2.8139 | 0.0000 | 3.8141 | 0.0000 | 1.4473 | 0 |
| 1716 | 174.7 | 0.7225 | 0.4285 | 12.8393 | 3.5230 | 0.0000 | 2.3465 | 0.0000 | 3.5302 | 0.0000 | 2.3851 | 0.0000 | 1.7832    | 0.0000 | 2.8140 | 0.0000 | 3.8141 | 0.0000 | 1.4473 | 0 |
| 1717 | 174.6 | 0.7221 | 0.4288 | 12.8475 | 3.5229 | 0.0000 | 2.3465 | 0.0000 | 3.5302 | 0.0000 | 2.3851 | 0.0000 | 1.7832    | 0.0000 | 2.8140 | 0.0000 | 3.8140 | 0.0000 | 1.4473 | 0 |
| 1718 | 174.5 | 0.7217 | 0.4290 | 12.8557 | 3.5229 | 0.0000 | 2.3465 | 0.0000 | 3.5302 | 0.0000 | 2.3850 | 0.0000 | 1.7832    | 0.0000 | 2.8141 | 0.0000 | 3.8139 | 0.0000 | 1.4473 | 0 |
| 1719 | 174.4 | 0.7213 | 0.4293 | 12.8639 | 3.5228 | 0.0000 | 2.3465 | 0.0000 | 3.5301 | 0.0000 | 2.3850 | 0.0000 | 1.7832    | 0.0000 | 2.8141 | 0.0000 | 3.8139 | 0.0000 | 1.4473 | 0 |
| 1720 | 174.3 | 0.7208 | 0.4296 | 12.8721 | 3.5228 | 0.0000 | 2.3464 | 0.0000 | 3.5301 | 0.0000 | 2.3850 | 0.0000 | 1.7832    | 0.0000 | 2.8142 | 0.0000 | 3.8138 | 0.0000 | 1.4473 | 0 |
| 1721 | 174.2 | 0.7204 | 0.4298 | 12.8803 | 3.5227 | 0.0000 | 2.3464 | 0.0000 | 3.5301 | 0.0000 | 2.3850 | 0.0000 | 1.7831    | 0.0000 | 2.8142 | 0.0000 | 3.8137 | 0.0000 | 1.4473 | 0 |
| 1722 | 174.1 | 0.7200 | 0.4301 | 12.8885 | 3.5226 | 0.0000 | 2.3464 | 0.0000 | 3.5301 | 0.0000 | 2.3850 | 0.0000 | 1.7831    | 0.0000 | 2.8143 | 0.0000 | 3.8137 | 0.0000 | 1.4473 | 0 |
| 1723 | 174   | 0.7196 | 0.4304 | 12.8967 | 3.5226 | 0.0000 | 2.3464 | 0.0000 | 3.5300 | 0.0000 | 2.3849 | 0.0000 | 1.7831    | 0.0000 | 2.8144 | 0.0000 | 3.8136 | 0.0000 | 1.4473 | 0 |
| 1724 | 173.9 | 0.7192 | 0.4306 | 12.9049 | 3.5225 | 0.0000 | 2.3463 | 0.0000 | 3.5300 | 0.0000 | 2.3849 | 0.0000 | 1.7831    | 0.0000 | 2.8144 | 0.0000 | 3.8135 | 0.0000 | 1.4473 | 0 |
| 1725 | 173.8 | 0.7187 | 0.4309 | 12.9131 | 3.5225 | 0.0000 | 2.3463 | 0.0000 | 3.5300 | 0.0000 | 2.3849 | 0.0000 | 1.7831    | 0.0000 | 2.8145 | 0.0000 | 3.8135 | 0.0000 | 1.4473 | 0 |
| 1726 | 173.7 | 0.7183 | 0.4312 | 12.9213 | 3.5224 | 0.0000 | 2.3463 | 0.0000 | 3.5300 | 0.0000 | 2.3849 | 0.0000 | 1.7831    | 0.0000 | 2.8145 | 0.0000 | 3.8134 | 0.0000 | 1.4473 | 0 |
| 1727 | 173.6 | 0.7179 | 0.4314 | 12.9295 | 3.5224 | 0.0000 | 2.3463 | 0.0000 | 3.5300 | 0.0000 | 2.3849 | 0.0000 | 1.7830    | 0.0000 | 2.8146 | 0.0000 | 3.8133 | 0.0000 | 1.4473 | 0 |
| 1728 | 173.5 | 0.7175 | 0.4317 | 12.9377 | 3.5223 | 0.0000 | 2.3462 | 0.0000 | 3.5299 | 0.0000 | 2.3849 | 0.0000 | 1.7830    | 0.0000 | 2.8146 | 0.0000 | 3.8133 | 0.0000 | 1.4473 | 0 |
| 1729 | 173.4 | 0.7171 | 0.4320 | 12.9459 | 3.5223 | 0.0000 | 2.3462 | 0.0000 | 3.5299 | 0.0000 | 2.3848 | 0.0000 | 1.7830    | 0.0000 | 2.8147 | 0.0000 | 3.8132 | 0.0000 | 1.4473 | 0 |
| 1730 | 173.3 | 0.7167 | 0.4322 | 12.9541 | 3.5222 | 0.0000 | 2.3462 | 0.0000 | 3.5299 | 0.0000 | 2.3848 | 0.0000 | 1.7830    | 0.0000 | 2.8147 | 0.0000 | 3.8131 | 0.0000 | 1.4473 | 0 |
| 1731 | 173.2 | 0.7163 | 0.4325 | 12.9623 | 3.5222 | 0.0000 | 2.3462 | 0.0000 | 3.5299 | 0.0000 | 2.3848 | 0.0000 | 1.7830    | 0.0000 | 2.8148 | 0.0000 | 3.8131 | 0.0000 | 1.4473 | 0 |
| 1732 | 173.1 | 0.7158 | 0.4328 | 12.9705 | 3.5221 | 0.0000 | 2.3462 | 0.0000 | 3.5298 | 0.0000 | 2.3848 | 0.0000 | 1.7830    | 0.0000 | 2.8148 | 0.0000 | 3.8130 | 0.0000 | 1.4473 | 0 |
| 1733 | 173   | 0.7154 | 0.4331 | 12.9787 | 3.5220 | 0.0000 | 2.3461 | 0.0000 | 3.5298 | 0.0000 | 2.3848 | 0.0000 | 1.7829    | 0.0000 | 2.8149 | 0.0000 | 3.8129 | 0.0000 | 1.4473 | 0 |
| 1734 | 172.9 | 0.7150 | 0.4333 | 12.9869 | 3.5220 | 0.0000 | 2.3461 | 0.0000 | 3.5298 | 0.0000 | 2.3848 | 0.0000 | 1.7829    | 0.0000 | 2.8149 | 0.0000 | 3.8129 | 0.0000 | 1.4473 | 0 |
| 1735 | 172.8 | 0.7146 | 0.4336 | 12.9951 | 3.5219 | 0.0000 | 2.3461 | 0.0000 | 3.5298 | 0.0000 | 2.3847 | 0.0000 | 1.7829    | 0.0000 | 2.8150 | 0.0000 | 3.8128 | 0.0000 | 1.4473 | 0 |



| nm   | THz   | eV     | Ag     |         | cSi    |        | Fe2O3  |        | GaAs   |        | TiO2   |        | P3HT:PCBM |        | CdTe   |        | aSi    |        | SiO2   |   |
|------|-------|--------|--------|---------|--------|--------|--------|--------|--------|--------|--------|--------|-----------|--------|--------|--------|--------|--------|--------|---|
|      |       |        | n      | k       | n      | k      | n      | k      | n      | k      | n      | k      | n         | k      | n      | k      | n      | k      | n      | k |
| 1736 | 172.7 | 0.7142 | 0.4339 | 13.0033 | 3.5219 | 0.0000 | 2.3461 | 0.0000 | 3.5298 | 0.0000 | 2.3847 | 0.0000 | 1.7829    | 0.0000 | 2.8150 | 0.0000 | 3.8127 | 0.0000 | 1.4473 | 0 |
| 1737 | 172.6 | 0.7138 | 0.4341 | 13.0115 | 3.5218 | 0.0000 | 2.3460 | 0.0000 | 3.5297 | 0.0000 | 2.3847 | 0.0000 | 1.7829    | 0.0000 | 2.8151 | 0.0000 | 3.8127 | 0.0000 | 1.4473 | 0 |
| 1738 | 172.5 | 0.7134 | 0.4344 | 13.0197 | 3.5218 | 0.0000 | 2.3460 | 0.0000 | 3.5297 | 0.0000 | 2.3847 | 0.0000 | 1.7829    | 0.0000 | 2.8151 | 0.0000 | 3.8126 | 0.0000 | 1.4473 | 0 |
| 1739 | 172.4 | 0.7130 | 0.4347 | 13.0279 | 3.5217 | 0.0000 | 2.3460 | 0.0000 | 3.5297 | 0.0000 | 2.3847 | 0.0000 | 1.7828    | 0.0000 | 2.8152 | 0.0000 | 3.8125 | 0.0000 | 1.4473 | 0 |
| 1740 | 172.3 | 0.7126 | 0.4349 | 13.0362 | 3.5217 | 0.0000 | 2.3460 | 0.0000 | 3.5297 | 0.0000 | 2.3847 | 0.0000 | 1.7828    | 0.0000 | 2.8152 | 0.0000 | 3.8125 | 0.0000 | 1.4473 | 0 |
| 1741 | 172.2 | 0.7121 | 0.4352 | 13.0444 | 3.5216 | 0.0000 | 2.3459 | 0.0000 | 3.5296 | 0.0000 | 2.3847 | 0.0000 | 1.7828    | 0.0000 | 2.8153 | 0.0000 | 3.8124 | 0.0000 | 1.4473 | 0 |
| 1742 | 172.1 | 0.7117 | 0.4355 | 13.0526 | 3.5216 | 0.0000 | 2.3459 | 0.0000 | 3.5296 | 0.0000 | 2.3846 | 0.0000 | 1.7828    | 0.0000 | 2.8153 | 0.0000 | 3.8123 | 0.0000 | 1.4473 | 0 |
| 1743 | 172   | 0.7113 | 0.4357 | 13.0608 | 3.5215 | 0.0000 | 2.3459 | 0.0000 | 3.5296 | 0.0000 | 2.3846 | 0.0000 | 1.7828    | 0.0000 | 2.8154 | 0.0000 | 3.8123 | 0.0000 | 1.4473 | 0 |
| 1744 | 171.9 | 0.7109 | 0.4360 | 13.0690 | 3.5215 | 0.0000 | 2.3459 | 0.0000 | 3.5296 | 0.0000 | 2.3846 | 0.0000 | 1.7828    | 0.0000 | 2.8154 | 0.0000 | 3.8122 | 0.0000 | 1.4473 | 0 |
| 1745 | 171.8 | 0.7105 | 0.4363 | 13.0772 | 3.5214 | 0.0000 | 2.3459 | 0.0000 | 3.5295 | 0.0000 | 2.3846 | 0.0000 | 1.7827    | 0.0000 | 2.8155 | 0.0000 | 3.8122 | 0.0000 | 1.4473 | 0 |
| 1746 | 171.7 | 0.7101 | 0.4366 | 13.0855 | 3.5213 | 0.0000 | 2.3458 | 0.0000 | 3.5295 | 0.0000 | 2.3846 | 0.0000 | 1.7827    | 0.0000 | 2.8155 | 0.0000 | 3.8121 | 0.0000 | 1.4473 | 0 |
| 1747 | 171.6 | 0.7097 | 0.4368 | 13.0937 | 3.5213 | 0.0000 | 2.3458 | 0.0000 | 3.5295 | 0.0000 | 2.3846 | 0.0000 | 1.7827    | 0.0000 | 2.8156 | 0.0000 | 3.8120 | 0.0000 | 1.4473 | 0 |
| 1748 | 171.5 | 0.7093 | 0.4371 | 13.1019 | 3.5212 | 0.0000 | 2.3458 | 0.0000 | 3.5295 | 0.0000 | 2.3845 | 0.0000 | 1.7827    | 0.0000 | 2.8156 | 0.0000 | 3.8120 | 0.0000 | 1.4473 | 0 |
| 1749 | 171.4 | 0.7089 | 0.4374 | 13.1101 | 3.5212 | 0.0000 | 2.3458 | 0.0000 | 3.5295 | 0.0000 | 2.3845 | 0.0000 | 1.7827    | 0.0000 | 2.8157 | 0.0000 | 3.8119 | 0.0000 | 1.4473 | 0 |
| 1750 | 171.3 | 0.7085 | 0.4377 | 13.1183 | 3.5211 | 0.0000 | 2.3457 | 0.0000 | 3.5294 | 0.0000 | 2.3845 | 0.0000 | 1.7827    | 0.0000 | 2.8157 | 0.0000 | 3.8118 | 0.0000 | 1.4473 | 0 |
| 1751 | 171.2 | 0.7081 | 0.4379 | 13.1266 | 3.5211 | 0.0000 | 2.3457 | 0.0000 | 3.5294 | 0.0000 | 2.3845 | 0.0000 | 1.7826    | 0.0000 | 2.8158 | 0.0000 | 3.8118 | 0.0000 | 1.4473 | 0 |
| 1752 | 171.1 | 0.7077 | 0.4382 | 13.1348 | 3.5210 | 0.0000 | 2.3457 | 0.0000 | 3.5294 | 0.0000 | 2.3845 | 0.0000 | 1.7826    | 0.0000 | 2.8159 | 0.0000 | 3.8117 | 0.0000 | 1.4473 | 0 |
| 1753 | 171   | 0.7073 | 0.4385 | 13.1430 | 3.5210 | 0.0000 | 2.3457 | 0.0000 | 3.5294 | 0.0000 | 2.3845 | 0.0000 | 1.7826    | 0.0000 | 2.8159 | 0.0000 | 3.8116 | 0.0000 | 1.4473 | 0 |
| 1754 | 170.9 | 0.7069 | 0.4387 | 13.1512 | 3.5209 | 0.0000 | 2.3457 | 0.0000 | 3.5293 | 0.0000 | 2.3844 | 0.0000 | 1.7826    | 0.0000 | 2.8160 | 0.0000 | 3.8116 | 0.0000 | 1.4473 | 0 |
| 1755 | 170.8 | 0.7065 | 0.4390 | 13.1595 | 3.5209 | 0.0000 | 2.3456 | 0.0000 | 3.5293 | 0.0000 | 2.3844 | 0.0000 | 1.7826    | 0.0000 | 2.8160 | 0.0000 | 3.8115 | 0.0000 | 1.4473 | 0 |
| 1756 | 170.7 | 0.7061 | 0.4393 | 13.1677 | 3.5208 | 0.0000 | 2.3456 | 0.0000 | 3.5293 | 0.0000 | 2.3844 | 0.0000 | 1.7826    | 0.0000 | 2.8161 | 0.0000 | 3.8115 | 0.0000 | 1.4473 | 0 |
| 1757 | 170.6 | 0.7057 | 0.4396 | 13.1759 | 3.5208 | 0.0000 | 2.3456 | 0.0000 | 3.5293 | 0.0000 | 2.3844 | 0.0000 | 1.7825    | 0.0000 | 2.8161 | 0.0000 | 3.8114 | 0.0000 | 1.4473 | 0 |
| 1758 | 170.5 | 0.7053 | 0.4398 | 13.1842 | 3.5207 | 0.0000 | 2.3456 | 0.0000 | 3.5293 | 0.0000 | 2.3844 | 0.0000 | 1.7825    | 0.0000 | 2.8162 | 0.0000 | 3.8113 | 0.0000 | 1.4473 | 0 |
| 1759 | 170.4 | 0.7049 | 0.4401 | 13.1924 | 3.5207 | 0.0000 | 2.3455 | 0.0000 | 3.5292 | 0.0000 | 2.3844 | 0.0000 | 1.7825    | 0.0000 | 2.8162 | 0.0000 | 3.8113 | 0.0000 | 1.4473 | 0 |
| 1760 | 170.3 | 0.7045 | 0.4404 | 13.2006 | 3.5206 | 0.0000 | 2.3455 | 0.0000 | 3.5292 | 0.0000 | 2.3843 | 0.0000 | 1.7825    | 0.0000 | 2.8163 | 0.0000 | 3.8112 | 0.0000 | 1.4473 | 0 |
| 1761 | 170.2 | 0.7041 | 0.4407 | 13.2089 | 3.5206 | 0.0000 | 2.3455 | 0.0000 | 3.5292 | 0.0000 | 2.3843 | 0.0000 | 1.7825    | 0.0000 | 2.8163 | 0.0000 | 3.8112 | 0.0000 | 1.4473 | 0 |
| 1762 | 170.1 | 0.7037 | 0.4409 | 13.2171 | 3.5205 | 0.0000 | 2.3455 | 0.0000 | 3.5292 | 0.0000 | 2.3843 | 0.0000 | 1.7825    | 0.0000 | 2.8164 | 0.0000 | 3.8111 | 0.0000 | 1.4473 | 0 |
| 1763 | 170   | 0.7033 | 0.4412 | 13.2253 | 3.5205 | 0.0000 | 2.3455 | 0.0000 | 3.5292 | 0.0000 | 2.3843 | 0.0000 | 1.7824    | 0.0000 | 2.8164 | 0.0000 | 3.8110 | 0.0000 | 1.4473 | 0 |
| 1764 | 170   | 0.7029 | 0.4415 | 13.2336 | 3.5204 | 0.0000 | 2.3454 | 0.0000 | 3.5291 | 0.0000 | 2.3843 | 0.0000 | 1.7824    | 0.0000 | 2.8165 | 0.0000 | 3.8110 | 0.0000 | 1.4473 | 0 |
| 1765 | 169.9 | 0.7025 | 0.4418 | 13.2418 | 3.5204 | 0.0000 | 2.3454 | 0.0000 | 3.5291 | 0.0000 | 2.3843 | 0.0000 | 1.7824    | 0.0000 | 2.8166 | 0.0000 | 3.8109 | 0.0000 | 1.4473 | 0 |
| 1766 | 169.8 | 0.7021 | 0.4420 | 13.2500 | 3.5203 | 0.0000 | 2.3454 | 0.0000 | 3.5291 | 0.0000 | 2.3843 | 0.0000 | 1.7824    | 0.0000 | 2.8166 | 0.0000 | 3.8108 | 0.0000 | 1.4473 | 0 |
| 1767 | 169.7 | 0.7017 | 0.4423 | 13.2583 | 3.5203 | 0.0000 | 2.3454 | 0.0000 | 3.5291 | 0.0000 | 2.3842 | 0.0000 | 1.7824    | 0.0000 | 2.8167 | 0.0000 | 3.8108 | 0.0000 | 1.4473 | 0 |

| nm   | THz   | eV     | Ag     |         | cSi    |        | Fe2O3  |        | GaAs   |        | TiO2   |        | P3HT:PCBM |        | CdTe   |        | aSi    |        | SiO2   |   |
|------|-------|--------|--------|---------|--------|--------|--------|--------|--------|--------|--------|--------|-----------|--------|--------|--------|--------|--------|--------|---|
|      |       |        | n      | k       | n      | k      | n      | k      | n      | k      | n      | k      | n         | k      | n      | k      | n      | k      | n      | k |
| 1768 | 169.6 | 0.7013 | 0.4426 | 13.2665 | 3.5202 | 0.0000 | 2.3454 | 0.0000 | 3.5290 | 0.0000 | 2.3842 | 0.0000 | 1.7824    | 0.0000 | 2.8167 | 0.0000 | 3.8107 | 0.0000 | 1.4473 | 0 |
| 1769 | 169.5 | 0.7009 | 0.4429 | 13.2748 | 3.5202 | 0.0000 | 2.3453 | 0.0000 | 3.5290 | 0.0000 | 2.3842 | 0.0000 | 1.7824    | 0.0000 | 2.8168 | 0.0000 | 3.8107 | 0.0000 | 1.4472 | 0 |
| 1770 | 169.4 | 0.7005 | 0.4431 | 13.2830 | 3.5201 | 0.0000 | 2.3453 | 0.0000 | 3.5290 | 0.0000 | 2.3842 | 0.0000 | 1.7823    | 0.0000 | 2.8168 | 0.0000 | 3.8106 | 0.0000 | 1.4472 | 0 |
| 1771 | 169.3 | 0.7001 | 0.4434 | 13.2913 | 3.5201 | 0.0000 | 2.3453 | 0.0000 | 3.5290 | 0.0000 | 2.3842 | 0.0000 | 1.7823    | 0.0000 | 2.8169 | 0.0000 | 3.8105 | 0.0000 | 1.4472 | 0 |
| 1772 | 169.2 | 0.6997 | 0.4437 | 13.2995 | 3.5200 | 0.0000 | 2.3453 | 0.0000 | 3.5290 | 0.0000 | 2.3842 | 0.0000 | 1.7823    | 0.0000 | 2.8169 | 0.0000 | 3.8105 | 0.0000 | 1.4472 | 0 |
| 1773 | 169.1 | 0.6993 | 0.4440 | 13.3077 | 3.5200 | 0.0000 | 2.3452 | 0.0000 | 3.5289 | 0.0000 | 2.3841 | 0.0000 | 1.7823    | 0.0000 | 2.8170 | 0.0000 | 3.8104 | 0.0000 | 1.4472 | 0 |
| 1774 | 169   | 0.6989 | 0.4442 | 13.3160 | 3.5199 | 0.0000 | 2.3452 | 0.0000 | 3.5289 | 0.0000 | 2.3841 | 0.0000 | 1.7823    | 0.0000 | 2.8170 | 0.0000 | 3.8104 | 0.0000 | 1.4472 | 0 |
| 1775 | 168.9 | 0.6985 | 0.4445 | 13.3242 | 3.5199 | 0.0000 | 2.3452 | 0.0000 | 3.5289 | 0.0000 | 2.3841 | 0.0000 | 1.7823    | 0.0000 | 2.8171 | 0.0000 | 3.8103 | 0.0000 | 1.4472 | 0 |
| 1776 | 168.8 | 0.6981 | 0.4448 | 13.3325 | 3.5198 | 0.0000 | 2.3452 | 0.0000 | 3.5289 | 0.0000 | 2.3841 | 0.0000 | 1.7822    | 0.0000 | 2.8172 | 0.0000 | 3.8102 | 0.0000 | 1.4472 | 0 |
| 1777 | 168.7 | 0.6977 | 0.4451 | 13.3407 | 3.5198 | 0.0000 | 2.3452 | 0.0000 | 3.5289 | 0.0000 | 2.3841 | 0.0000 | 1.7822    | 0.0000 | 2.8172 | 0.0000 | 3.8102 | 0.0000 | 1.4472 | 0 |
| 1778 | 168.6 | 0.6973 | 0.4454 | 13.3490 | 3.5197 | 0.0000 | 2.3451 | 0.0000 | 3.5288 | 0.0000 | 2.3841 | 0.0000 | 1.7822    | 0.0000 | 2.8173 | 0.0000 | 3.8101 | 0.0000 | 1.4472 | 0 |
| 1779 | 168.5 | 0.6969 | 0.4456 | 13.3572 | 3.5197 | 0.0000 | 2.3451 | 0.0000 | 3.5288 | 0.0000 | 2.3841 | 0.0000 | 1.7822    | 0.0000 | 2.8173 | 0.0000 | 3.8101 | 0.0000 | 1.4472 | 0 |
| 1780 | 168.4 | 0.6965 | 0.4459 | 13.3655 | 3.5196 | 0.0000 | 2.3451 | 0.0000 | 3.5288 | 0.0000 | 2.3840 | 0.0000 | 1.7822    | 0.0000 | 2.8174 | 0.0000 | 3.8100 | 0.0000 | 1.4472 | 0 |
| 1781 | 168.3 | 0.6961 | 0.4462 | 13.3737 | 3.5196 | 0.0000 | 2.3451 | 0.0000 | 3.5288 | 0.0000 | 2.3840 | 0.0000 | 1.7822    | 0.0000 | 2.8174 | 0.0000 | 3.8099 | 0.0000 | 1.4472 | 0 |
| 1782 | 168.2 | 0.6958 | 0.4465 | 13.3820 | 3.5195 | 0.0000 | 2.3451 | 0.0000 | 3.5288 | 0.0000 | 2.3840 | 0.0000 | 1.7821    | 0.0000 | 2.8175 | 0.0000 | 3.8099 | 0.0000 | 1.4472 | 0 |
| 1783 | 168.1 | 0.6954 | 0.4468 | 13.3903 | 3.5195 | 0.0000 | 2.3450 | 0.0000 | 3.5287 | 0.0000 | 2.3840 | 0.0000 | 1.7821    | 0.0000 | 2.8175 | 0.0000 | 3.8098 | 0.0000 | 1.4472 | 0 |
| 1784 | 168   | 0.6950 | 0.4470 | 13.3985 | 3.5194 | 0.0000 | 2.3450 | 0.0000 | 3.5287 | 0.0000 | 2.3840 | 0.0000 | 1.7821    | 0.0000 | 2.8176 | 0.0000 | 3.8098 | 0.0000 | 1.4472 | 0 |
| 1785 | 168   | 0.6946 | 0.4473 | 13.4068 | 3.5194 | 0.0000 | 2.3450 | 0.0000 | 3.5287 | 0.0000 | 2.3840 | 0.0000 | 1.7821    | 0.0000 | 2.8177 | 0.0000 | 3.8097 | 0.0000 | 1.4472 | 0 |
| 1786 | 167.9 | 0.6942 | 0.4476 | 13.4150 | 3.5193 | 0.0000 | 2.3450 | 0.0000 | 3.5287 | 0.0000 | 2.3839 | 0.0000 | 1.7821    | 0.0000 | 2.8177 | 0.0000 | 3.8096 | 0.0000 | 1.4472 | 0 |
| 1787 | 167.8 | 0.6938 | 0.4479 | 13.4233 | 3.5193 | 0.0000 | 2.3450 | 0.0000 | 3.5287 | 0.0000 | 2.3839 | 0.0000 | 1.7821    | 0.0000 | 2.8178 | 0.0000 | 3.8096 | 0.0000 | 1.4472 | 0 |
| 1788 | 167.7 | 0.6934 | 0.4482 | 13.4316 | 3.5192 | 0.0000 | 2.3449 | 0.0000 | 3.5286 | 0.0000 | 2.3839 | 0.0000 | 1.7821    | 0.0000 | 2.8178 | 0.0000 | 3.8095 | 0.0000 | 1.4472 | 0 |
| 1789 | 167.6 | 0.6930 | 0.4484 | 13.4398 | 3.5192 | 0.0000 | 2.3449 | 0.0000 | 3.5286 | 0.0000 | 2.3839 | 0.0000 | 1.7820    | 0.0000 | 2.8179 | 0.0000 | 3.8095 | 0.0000 | 1.4472 | 0 |
| 1790 | 167.5 | 0.6926 | 0.4487 | 13.4481 | 3.5191 | 0.0000 | 2.3449 | 0.0000 | 3.5286 | 0.0000 | 2.3839 | 0.0000 | 1.7820    | 0.0000 | 2.8179 | 0.0000 | 3.8094 | 0.0000 | 1.4472 | 0 |
| 1791 | 167.4 | 0.6923 | 0.4490 | 13.4563 | 3.5191 | 0.0000 | 2.3449 | 0.0000 | 3.5286 | 0.0000 | 2.3839 | 0.0000 | 1.7820    | 0.0000 | 2.8180 | 0.0000 | 3.8094 | 0.0000 | 1.4472 | 0 |
| 1792 | 167.3 | 0.6919 | 0.4493 | 13.4646 | 3.5190 | 0.0000 | 2.3449 | 0.0000 | 3.5286 | 0.0000 | 2.3839 | 0.0000 | 1.7820    | 0.0000 | 2.8180 | 0.0000 | 3.8093 | 0.0000 | 1.4472 | 0 |
| 1793 | 167.2 | 0.6915 | 0.4496 | 13.4729 | 3.5190 | 0.0000 | 2.3448 | 0.0000 | 3.5285 | 0.0000 | 2.3838 | 0.0000 | 1.7820    | 0.0000 | 2.8181 | 0.0000 | 3.8092 | 0.0000 | 1.4472 | 0 |
| 1794 | 167.1 | 0.6911 | 0.4498 | 13.4811 | 3.5189 | 0.0000 | 2.3448 | 0.0000 | 3.5285 | 0.0000 | 2.3838 | 0.0000 | 1.7820    | 0.0000 | 2.8182 | 0.0000 | 3.8092 | 0.0000 | 1.4472 | 0 |
| 1795 | 167   | 0.6907 | 0.4501 | 13.4894 | 3.5189 | 0.0000 | 2.3448 | 0.0000 | 3.5285 | 0.0000 | 2.3838 | 0.0000 | 1.7820    | 0.0000 | 2.8182 | 0.0000 | 3.8091 | 0.0000 | 1.4472 | 0 |
| 1796 | 166.9 | 0.6903 | 0.4504 | 13.4977 | 3.5188 | 0.0000 | 2.3448 | 0.0000 | 3.5285 | 0.0000 | 2.3838 | 0.0000 | 1.7819    | 0.0000 | 2.8183 | 0.0000 | 3.8091 | 0.0000 | 1.4472 | 0 |
| 1797 | 166.8 | 0.6900 | 0.4507 | 13.5060 | 3.5188 | 0.0000 | 2.3448 | 0.0000 | 3.5285 | 0.0000 | 2.3838 | 0.0000 | 1.7819    | 0.0000 | 2.8183 | 0.0000 | 3.8090 | 0.0000 | 1.4472 | 0 |
| 1798 | 166.7 | 0.6896 | 0.4510 | 13.5142 | 3.5187 | 0.0000 | 2.3447 | 0.0000 | 3.5284 | 0.0000 | 2.3838 | 0.0000 | 1.7819    | 0.0000 | 2.8184 | 0.0000 | 3.8090 | 0.0000 | 1.4472 | 0 |
| 1799 | 166.6 | 0.6892 | 0.4512 | 13.5225 | 3.5187 | 0.0000 | 2.3447 | 0.0000 | 3.5284 | 0.0000 | 2.3838 | 0.0000 | 1.7819    | 0.0000 | 2.8184 | 0.0000 | 3.8089 | 0.0000 | 1.4472 | 0 |

| nm   | THz   | eV     | Ag     |         | cSi    |        | Fe2O3  |        | GaAs   |        | TiO2   |        | P3HT:PCBM |        | CdTe   |        | aSi    |        | SiO2   |   |
|------|-------|--------|--------|---------|--------|--------|--------|--------|--------|--------|--------|--------|-----------|--------|--------|--------|--------|--------|--------|---|
|      |       |        | n      | k       | n      | k      | n      | k      | n      | k      | n      | k      | n         | k      | n      | k      | n      | k      | n      | k |
| 1800 | 166.6 | 0.6888 | 0.4515 | 13.5308 | 3.5186 | 0.0000 | 2.3447 | 0.0000 | 3.5284 | 0.0000 | 2.3837 | 0.0000 | 1.7819    | 0.0000 | 2.8185 | 0.0000 | 3.8088 | 0.0000 | 1.4472 | 0 |
| 1801 | 166.5 | 0.6884 | 0.4518 | 13.5390 | 3.5186 | 0.0000 | 2.3447 | 0.0000 | 3.5284 | 0.0000 | 2.3837 | 0.0000 | 1.7819    | 0.0000 | 2.8186 | 0.0000 | 3.8088 | 0.0000 | 1.4472 | 0 |
| 1802 | 166.4 | 0.6880 | 0.4521 | 13.5473 | 3.5185 | 0.0000 | 2.3447 | 0.0000 | 3.5284 | 0.0000 | 2.3837 | 0.0000 | 1.7819    | 0.0000 | 2.8186 | 0.0000 | 3.8087 | 0.0000 | 1.4472 | 0 |
| 1803 | 166.3 | 0.6877 | 0.4524 | 13.5556 | 3.5185 | 0.0000 | 2.3446 | 0.0000 | 3.5283 | 0.0000 | 2.3837 | 0.0000 | 1.7818    | 0.0000 | 2.8187 | 0.0000 | 3.8087 | 0.0000 | 1.4472 | 0 |
| 1804 | 166.2 | 0.6873 | 0.4527 | 13.5639 | 3.5184 | 0.0000 | 2.3446 | 0.0000 | 3.5283 | 0.0000 | 2.3837 | 0.0000 | 1.7818    | 0.0000 | 2.8187 | 0.0000 | 3.8086 | 0.0000 | 1.4472 | 0 |
| 1805 | 166.1 | 0.6869 | 0.4530 | 13.5722 | 3.5184 | 0.0000 | 2.3446 | 0.0000 | 3.5283 | 0.0000 | 2.3837 | 0.0000 | 1.7818    | 0.0000 | 2.8188 | 0.0000 | 3.8086 | 0.0000 | 1.4472 | 0 |
| 1806 | 166   | 0.6865 | 0.4532 | 13.5804 | 3.5183 | 0.0000 | 2.3446 | 0.0000 | 3.5283 | 0.0000 | 2.3836 | 0.0000 | 1.7818    | 0.0000 | 2.8188 | 0.0000 | 3.8085 | 0.0000 | 1.4472 | 0 |
| 1807 | 165.9 | 0.6861 | 0.4535 | 13.5887 | 3.5183 | 0.0000 | 2.3446 | 0.0000 | 3.5283 | 0.0000 | 2.3836 | 0.0000 | 1.7818    | 0.0000 | 2.8189 | 0.0000 | 3.8084 | 0.0000 | 1.4472 | 0 |
| 1808 | 165.8 | 0.6858 | 0.4538 | 13.5970 | 3.5182 | 0.0000 | 2.3445 | 0.0000 | 3.5282 | 0.0000 | 2.3836 | 0.0000 | 1.7818    | 0.0000 | 2.8190 | 0.0000 | 3.8084 | 0.0000 | 1.4472 | 0 |
| 1809 | 165.7 | 0.6854 | 0.4541 | 13.6053 | 3.5182 | 0.0000 | 2.3445 | 0.0000 | 3.5282 | 0.0000 | 2.3836 | 0.0000 | 1.7817    | 0.0000 | 2.8190 | 0.0000 | 3.8083 | 0.0000 | 1.4472 | 0 |
| 1810 | 165.6 | 0.6850 | 0.4544 | 13.6136 | 3.5181 | 0.0000 | 2.3445 | 0.0000 | 3.5282 | 0.0000 | 2.3836 | 0.0000 | 1.7817    | 0.0000 | 2.8191 | 0.0000 | 3.8083 | 0.0000 | 1.4472 | 0 |
| 1811 | 165.5 | 0.6846 | 0.4547 | 13.6219 | 3.5181 | 0.0000 | 2.3445 | 0.0000 | 3.5282 | 0.0000 | 2.3836 | 0.0000 | 1.7817    | 0.0000 | 2.8191 | 0.0000 | 3.8082 | 0.0000 | 1.4472 | 0 |
| 1812 | 165.4 | 0.6842 | 0.4549 | 13.6301 | 3.5181 | 0.0000 | 2.3445 | 0.0000 | 3.5282 | 0.0000 | 2.3836 | 0.0000 | 1.7817    | 0.0000 | 2.8192 | 0.0000 | 3.8082 | 0.0000 | 1.4472 | 0 |
| 1813 | 165.4 | 0.6839 | 0.4552 | 13.6384 | 3.5180 | 0.0000 | 2.3444 | 0.0000 | 3.5281 | 0.0000 | 2.3835 | 0.0000 | 1.7817    | 0.0000 | 2.8193 | 0.0000 | 3.8081 | 0.0000 | 1.4472 | 0 |
| 1814 | 165.3 | 0.6835 | 0.4555 | 13.6467 | 3.5180 | 0.0000 | 2.3444 | 0.0000 | 3.5281 | 0.0000 | 2.3835 | 0.0000 | 1.7817    | 0.0000 | 2.8193 | 0.0000 | 3.8080 | 0.0000 | 1.4472 | 0 |
| 1815 | 165.2 | 0.6831 | 0.4558 | 13.6550 | 3.5179 | 0.0000 | 2.3444 | 0.0000 | 3.5281 | 0.0000 | 2.3835 | 0.0000 | 1.7817    | 0.0000 | 2.8194 | 0.0000 | 3.8080 | 0.0000 | 1.4472 | 0 |
| 1816 | 165.1 | 0.6827 | 0.4561 | 13.6633 | 3.5179 | 0.0000 | 2.3444 | 0.0000 | 3.5281 | 0.0000 | 2.3835 | 0.0000 | 1.7816    | 0.0000 | 2.8194 | 0.0000 | 3.8079 | 0.0000 | 1.4472 | 0 |
| 1817 | 165   | 0.6824 | 0.4564 | 13.6716 | 3.5178 | 0.0000 | 2.3444 | 0.0000 | 3.5281 | 0.0000 | 2.3835 | 0.0000 | 1.7816    | 0.0000 | 2.8195 | 0.0000 | 3.8079 | 0.0000 | 1.4472 | 0 |
| 1818 | 164.9 | 0.6820 | 0.4567 | 13.6799 | 3.5178 | 0.0000 | 2.3443 | 0.0000 | 3.5280 | 0.0000 | 2.3835 | 0.0000 | 1.7816    | 0.0000 | 2.8195 | 0.0000 | 3.8078 | 0.0000 | 1.4472 | 0 |
| 1819 | 164.8 | 0.6816 | 0.4570 | 13.6882 | 3.5177 | 0.0000 | 2.3443 | 0.0000 | 3.5280 | 0.0000 | 2.3835 | 0.0000 | 1.7816    | 0.0000 | 2.8196 | 0.0000 | 3.8078 | 0.0000 | 1.4472 | 0 |
| 1820 | 164.7 | 0.6812 | 0.4572 | 13.6965 | 3.5177 | 0.0000 | 2.3443 | 0.0000 | 3.5280 | 0.0000 | 2.3834 | 0.0000 | 1.7816    | 0.0000 | 2.8197 | 0.0000 | 3.8077 | 0.0000 | 1.4472 | 0 |
| 1821 | 164.6 | 0.6809 | 0.4575 | 13.7048 | 3.5176 | 0.0000 | 2.3443 | 0.0000 | 3.5280 | 0.0000 | 2.3834 | 0.0000 | 1.7816    | 0.0000 | 2.8197 | 0.0000 | 3.8077 | 0.0000 | 1.4472 | 0 |
| 1822 | 164.5 | 0.6805 | 0.4578 | 13.7131 | 3.5176 | 0.0000 | 2.3443 | 0.0000 | 3.5280 | 0.0000 | 2.3834 | 0.0000 | 1.7816    | 0.0000 | 2.8198 | 0.0000 | 3.8076 | 0.0000 | 1.4472 | 0 |
| 1823 | 164.5 | 0.6801 | 0.4581 | 13.7214 | 3.5175 | 0.0000 | 2.3442 | 0.0000 | 3.5279 | 0.0000 | 2.3834 | 0.0000 | 1.7815    | 0.0000 | 2.8198 | 0.0000 | 3.8076 | 0.0000 | 1.4472 | 0 |
| 1824 | 164.4 | 0.6797 | 0.4584 | 13.7297 | 3.5175 | 0.0000 | 2.3442 | 0.0000 | 3.5279 | 0.0000 | 2.3834 | 0.0000 | 1.7815    | 0.0000 | 2.8199 | 0.0000 | 3.8075 | 0.0000 | 1.4472 | 0 |
| 1825 | 164.3 | 0.6794 | 0.4587 | 13.7380 | 3.5174 | 0.0000 | 2.3442 | 0.0000 | 3.5279 | 0.0000 | 2.3834 | 0.0000 | 1.7815    | 0.0000 | 2.8200 | 0.0000 | 3.8074 | 0.0000 | 1.4472 | 0 |
| 1826 | 164.2 | 0.6790 | 0.4590 | 13.7463 | 3.5174 | 0.0000 | 2.3442 | 0.0000 | 3.5279 | 0.0000 | 2.3834 | 0.0000 | 1.7815    | 0.0000 | 2.8200 | 0.0000 | 3.8074 | 0.0000 | 1.4472 | 0 |
| 1827 | 164.1 | 0.6786 | 0.4593 | 13.7546 | 3.5174 | 0.0000 | 2.3442 | 0.0000 | 3.5279 | 0.0000 | 2.3833 | 0.0000 | 1.7815    | 0.0000 | 2.8201 | 0.0000 | 3.8073 | 0.0000 | 1.4472 | 0 |
| 1828 | 164   | 0.6783 | 0.4595 | 13.7629 | 3.5173 | 0.0000 | 2.3442 | 0.0000 | 3.5279 | 0.0000 | 2.3833 | 0.0000 | 1.7815    | 0.0000 | 2.8201 | 0.0000 | 3.8073 | 0.0000 | 1.4472 | 0 |
| 1829 | 163.9 | 0.6779 | 0.4598 | 13.7712 | 3.5173 | 0.0000 | 2.3441 | 0.0000 | 3.5278 | 0.0000 | 2.3833 | 0.0000 | 1.7815    | 0.0000 | 2.8202 | 0.0000 | 3.8072 | 0.0000 | 1.4472 | 0 |
| 1830 | 163.8 | 0.6775 | 0.4601 | 13.7795 | 3.5172 | 0.0000 | 2.3441 | 0.0000 | 3.5278 | 0.0000 | 2.3833 | 0.0000 | 1.7815    | 0.0000 | 2.8203 | 0.0000 | 3.8072 | 0.0000 | 1.4472 | 0 |
| 1831 | 163.7 | 0.6771 | 0.4604 | 13.7878 | 3.5172 | 0.0000 | 2.3441 | 0.0000 | 3.5278 | 0.0000 | 2.3833 | 0.0000 | 1.7814    | 0.0000 | 2.8203 | 0.0000 | 3.8071 | 0.0000 | 1.4472 | 0 |

| nm   | THz   | eV     | Ag     |         | cSi    |        | Fe2O3  |        | GaAs   |        | TiO2   |        | P3HT:PCBM |        | CdTe   |        | aSi    |        | SiO2   |   |
|------|-------|--------|--------|---------|--------|--------|--------|--------|--------|--------|--------|--------|-----------|--------|--------|--------|--------|--------|--------|---|
|      |       |        | n      | k       | n      | k      | n      | k      | n      | k      | n      | k      | n         | k      | n      | k      | n      | k      | n      | k |
| 1832 | 163.6 | 0.6768 | 0.4607 | 13.7961 | 3.5171 | 0.0000 | 2.3441 | 0.0000 | 3.5278 | 0.0000 | 2.3833 | 0.0000 | 1.7814    | 0.0000 | 2.8204 | 0.0000 | 3.8071 | 0.0000 | 1.4472 | 0 |
| 1833 | 163.6 | 0.6764 | 0.4610 | 13.8044 | 3.5171 | 0.0000 | 2.3441 | 0.0000 | 3.5278 | 0.0000 | 2.3833 | 0.0000 | 1.7814    | 0.0000 | 2.8204 | 0.0000 | 3.8070 | 0.0000 | 1.4472 | 0 |
| 1834 | 163.5 | 0.6760 | 0.4613 | 13.8127 | 3.5170 | 0.0000 | 2.3440 | 0.0000 | 3.5277 | 0.0000 | 2.3833 | 0.0000 | 1.7814    | 0.0000 | 2.8205 | 0.0000 | 3.8070 | 0.0000 | 1.4472 | 0 |
| 1835 | 163.4 | 0.6757 | 0.4616 | 13.8210 | 3.5170 | 0.0000 | 2.3440 | 0.0000 | 3.5277 | 0.0000 | 2.3832 | 0.0000 | 1.7814    | 0.0000 | 2.8206 | 0.0000 | 3.8069 | 0.0000 | 1.4472 | 0 |
| 1836 | 163.3 | 0.6753 | 0.4619 | 13.8293 | 3.5169 | 0.0000 | 2.3440 | 0.0000 | 3.5277 | 0.0000 | 2.3832 | 0.0000 | 1.7814    | 0.0000 | 2.8206 | 0.0000 | 3.8069 | 0.0000 | 1.4472 | 0 |
| 1837 | 163.2 | 0.6749 | 0.4622 | 13.8376 | 3.5169 | 0.0000 | 2.3440 | 0.0000 | 3.5277 | 0.0000 | 2.3832 | 0.0000 | 1.7814    | 0.0000 | 2.8207 | 0.0000 | 3.8068 | 0.0000 | 1.4472 | 0 |
| 1838 | 163.1 | 0.6746 | 0.4625 | 13.8460 | 3.5169 | 0.0000 | 2.3440 | 0.0000 | 3.5277 | 0.0000 | 2.3832 | 0.0000 | 1.7813    | 0.0000 | 2.8207 | 0.0000 | 3.8067 | 0.0000 | 1.4472 | 0 |
| 1839 | 163   | 0.6742 | 0.4627 | 13.8543 | 3.5168 | 0.0000 | 2.3439 | 0.0000 | 3.5276 | 0.0000 | 2.3832 | 0.0000 | 1.7813    | 0.0000 | 2.8208 | 0.0000 | 3.8067 | 0.0000 | 1.4472 | 0 |
| 1840 | 162.9 | 0.6738 | 0.4630 | 13.8626 | 3.5168 | 0.0000 | 2.3439 | 0.0000 | 3.5276 | 0.0000 | 2.3832 | 0.0000 | 1.7813    | 0.0000 | 2.8209 | 0.0000 | 3.8066 | 0.0000 | 1.4472 | 0 |
| 1841 | 162.8 | 0.6735 | 0.4633 | 13.8709 | 3.5167 | 0.0000 | 2.3439 | 0.0000 | 3.5276 | 0.0000 | 2.3832 | 0.0000 | 1.7813    | 0.0000 | 2.8209 | 0.0000 | 3.8066 | 0.0000 | 1.4472 | 0 |
| 1842 | 162.8 | 0.6731 | 0.4636 | 13.8792 | 3.5167 | 0.0000 | 2.3439 | 0.0000 | 3.5276 | 0.0000 | 2.3831 | 0.0000 | 1.7813    | 0.0000 | 2.8210 | 0.0000 | 3.8065 | 0.0000 | 1.4472 | 0 |
| 1843 | 162.7 | 0.6727 | 0.4639 | 13.8875 | 3.5166 | 0.0000 | 2.3439 | 0.0000 | 3.5276 | 0.0000 | 2.3831 | 0.0000 | 1.7813    | 0.0000 | 2.8210 | 0.0000 | 3.8065 | 0.0000 | 1.4472 | 0 |
| 1844 | 162.6 | 0.6724 | 0.4642 | 13.8959 | 3.5166 | 0.0000 | 2.3439 | 0.0000 | 3.5276 | 0.0000 | 2.3831 | 0.0000 | 1.7813    | 0.0000 | 2.8211 | 0.0000 | 3.8064 | 0.0000 | 1.4472 | 0 |
| 1845 | 162.5 | 0.6720 | 0.4645 | 13.9042 | 3.5165 | 0.0000 | 2.3438 | 0.0000 | 3.5275 | 0.0000 | 2.3831 | 0.0000 | 1.7812    | 0.0000 | 2.8212 | 0.0000 | 3.8064 | 0.0000 | 1.4472 | 0 |
| 1846 | 162.4 | 0.6716 | 0.4648 | 13.9125 | 3.5165 | 0.0000 | 2.3438 | 0.0000 | 3.5275 | 0.0000 | 2.3831 | 0.0000 | 1.7812    | 0.0000 | 2.8212 | 0.0000 | 3.8063 | 0.0000 | 1.4472 | 0 |
| 1847 | 162.3 | 0.6713 | 0.4651 | 13.9208 | 3.5164 | 0.0000 | 2.3438 | 0.0000 | 3.5275 | 0.0000 | 2.3831 | 0.0000 | 1.7812    | 0.0000 | 2.8213 | 0.0000 | 3.8063 | 0.0000 | 1.4472 | 0 |
| 1848 | 162.2 | 0.6709 | 0.4654 | 13.9292 | 3.5164 | 0.0000 | 2.3438 | 0.0000 | 3.5275 | 0.0000 | 2.3831 | 0.0000 | 1.7812    | 0.0000 | 2.8213 | 0.0000 | 3.8062 | 0.0000 | 1.4472 | 0 |
| 1849 | 162.1 | 0.6705 | 0.4657 | 13.9375 | 3.5164 | 0.0000 | 2.3438 | 0.0000 | 3.5275 | 0.0000 | 2.3830 | 0.0000 | 1.7812    | 0.0000 | 2.8214 | 0.0000 | 3.8062 | 0.0000 | 1.4472 | 0 |
| 1850 | 162.1 | 0.6702 | 0.4660 | 13.9458 | 3.5163 | 0.0000 | 2.3437 | 0.0000 | 3.5274 | 0.0000 | 2.3830 | 0.0000 | 1.7812    | 0.0000 | 2.8215 | 0.0000 | 3.8061 | 0.0000 | 1.4472 | 0 |
| 1851 | 162   | 0.6698 | 0.4663 | 13.9541 | 3.5163 | 0.0000 | 2.3437 | 0.0000 | 3.5274 | 0.0000 | 2.3830 | 0.0000 | 1.7812    | 0.0000 | 2.8215 | 0.0000 | 3.8061 | 0.0000 | 1.4472 | 0 |
| 1852 | 161.9 | 0.6695 | 0.4666 | 13.9625 | 3.5162 | 0.0000 | 2.3437 | 0.0000 | 3.5274 | 0.0000 | 2.3830 | 0.0000 | 1.7812    | 0.0000 | 2.8216 | 0.0000 | 3.8060 | 0.0000 | 1.4472 | 0 |
| 1853 | 161.8 | 0.6691 | 0.4669 | 13.9708 | 3.5162 | 0.0000 | 2.3437 | 0.0000 | 3.5274 | 0.0000 | 2.3830 | 0.0000 | 1.7811    | 0.0000 | 2.8216 | 0.0000 | 3.8060 | 0.0000 | 1.4472 | 0 |
| 1854 | 161.7 | 0.6687 | 0.4671 | 13.9791 | 3.5161 | 0.0000 | 2.3437 | 0.0000 | 3.5274 | 0.0000 | 2.3830 | 0.0000 | 1.7811    | 0.0000 | 2.8217 | 0.0000 | 3.8059 | 0.0000 | 1.4472 | 0 |
| 1855 | 161.6 | 0.6684 | 0.4674 | 13.9875 | 3.5161 | 0.0000 | 2.3437 | 0.0000 | 3.5274 | 0.0000 | 2.3830 | 0.0000 | 1.7811    | 0.0000 | 2.8218 | 0.0000 | 3.8059 | 0.0000 | 1.4472 | 0 |
| 1856 | 161.5 | 0.6680 | 0.4677 | 13.9958 | 3.5161 | 0.0000 | 2.3436 | 0.0000 | 3.5273 | 0.0000 | 2.3830 | 0.0000 | 1.7811    | 0.0000 | 2.8218 | 0.0000 | 3.8058 | 0.0000 | 1.4472 | 0 |
| 1857 | 161.4 | 0.6677 | 0.4680 | 14.0041 | 3.5160 | 0.0000 | 2.3436 | 0.0000 | 3.5273 | 0.0000 | 2.3829 | 0.0000 | 1.7811    | 0.0000 | 2.8219 | 0.0000 | 3.8058 | 0.0000 | 1.4472 | 0 |
| 1858 | 161.4 | 0.6673 | 0.4683 | 14.0125 | 3.5160 | 0.0000 | 2.3436 | 0.0000 | 3.5273 | 0.0000 | 2.3829 | 0.0000 | 1.7811    | 0.0000 | 2.8220 | 0.0000 | 3.8057 | 0.0000 | 1.4472 | 0 |
| 1859 | 161.3 | 0.6669 | 0.4686 | 14.0208 | 3.5159 | 0.0000 | 2.3436 | 0.0000 | 3.5273 | 0.0000 | 2.3829 | 0.0000 | 1.7811    | 0.0000 | 2.8220 | 0.0000 | 3.8057 | 0.0000 | 1.4472 | 0 |
| 1860 | 161.2 | 0.6666 | 0.4689 | 14.0291 | 3.5159 | 0.0000 | 2.3436 | 0.0000 | 3.5273 | 0.0000 | 2.3829 | 0.0000 | 1.7810    | 0.0000 | 2.8221 | 0.0000 | 3.8056 | 0.0000 | 1.4471 | 0 |
| 1861 | 161.1 | 0.6662 | 0.4692 | 14.0375 | 3.5158 | 0.0000 | 2.3436 | 0.0000 | 3.5273 | 0.0000 | 2.3829 | 0.0000 | 1.7810    | 0.0000 | 2.8221 | 0.0000 | 3.8056 | 0.0000 | 1.4471 | 0 |
| 1862 | 161   | 0.6659 | 0.4695 | 14.0458 | 3.5158 | 0.0000 | 2.3435 | 0.0000 | 3.5272 | 0.0000 | 2.3829 | 0.0000 | 1.7810    | 0.0000 | 2.8222 | 0.0000 | 3.8055 | 0.0000 | 1.4471 | 0 |
| 1863 | 160.9 | 0.6655 | 0.4698 | 14.0542 | 3.5157 | 0.0000 | 2.3435 | 0.0000 | 3.5272 | 0.0000 | 2.3829 | 0.0000 | 1.7810    | 0.0000 | 2.8223 | 0.0000 | 3.8055 | 0.0000 | 1.4471 | 0 |

| nm   | THz   | eV     | Ag     |         | cSi    |        | Fe2O3  |        | GaAs   |        | TiO2   |        | P3HT:PCBM |        | CdTe   |        | aSi    |        | SiO2   |   |
|------|-------|--------|--------|---------|--------|--------|--------|--------|--------|--------|--------|--------|-----------|--------|--------|--------|--------|--------|--------|---|
|      |       |        | n      | k       | n      | k      | n      | k      | n      | k      | n      | k      | n         | k      | n      | k      | n      | k      | n      | k |
| 1864 | 160.8 | 0.6652 | 0.4701 | 14.0625 | 3.5157 | 0.0000 | 2.3435 | 0.0000 | 3.5272 | 0.0000 | 2.3828 | 0.0000 | 1.7810    | 0.0000 | 2.8223 | 0.0000 | 3.8054 | 0.0000 | 1.4471 | 0 |
| 1865 | 160.7 | 0.6648 | 0.4704 | 14.0709 | 3.5157 | 0.0000 | 2.3435 | 0.0000 | 3.5272 | 0.0000 | 2.3828 | 0.0000 | 1.7810    | 0.0000 | 2.8224 | 0.0000 | 3.8054 | 0.0000 | 1.4471 | 0 |
| 1866 | 160.7 | 0.6644 | 0.4707 | 14.0792 | 3.5156 | 0.0000 | 2.3435 | 0.0000 | 3.5272 | 0.0000 | 2.3828 | 0.0000 | 1.7810    | 0.0000 | 2.8224 | 0.0000 | 3.8053 | 0.0000 | 1.4471 | 0 |
| 1867 | 160.6 | 0.6641 | 0.4710 | 14.0875 | 3.5156 | 0.0000 | 2.3434 | 0.0000 | 3.5271 | 0.0000 | 2.3828 | 0.0000 | 1.7810    | 0.0000 | 2.8225 | 0.0000 | 3.8053 | 0.0000 | 1.4471 | 0 |
| 1868 | 160.5 | 0.6637 | 0.4713 | 14.0959 | 3.5155 | 0.0000 | 2.3434 | 0.0000 | 3.5271 | 0.0000 | 2.3828 | 0.0000 | 1.7809    | 0.0000 | 2.8226 | 0.0000 | 3.8052 | 0.0000 | 1.4471 | 0 |
| 1869 | 160.4 | 0.6634 | 0.4716 | 14.1042 | 3.5155 | 0.0000 | 2.3434 | 0.0000 | 3.5271 | 0.0000 | 2.3828 | 0.0000 | 1.7809    | 0.0000 | 2.8226 | 0.0000 | 3.8052 | 0.0000 | 1.4471 | 0 |
| 1870 | 160.3 | 0.6630 | 0.4719 | 14.1126 | 3.5154 | 0.0000 | 2.3434 | 0.0000 | 3.5271 | 0.0000 | 2.3828 | 0.0000 | 1.7809    | 0.0000 | 2.8227 | 0.0000 | 3.8051 | 0.0000 | 1.4471 | 0 |
| 1871 | 160.2 | 0.6627 | 0.4722 | 14.1209 | 3.5154 | 0.0000 | 2.3434 | 0.0000 | 3.5271 | 0.0000 | 2.3828 | 0.0000 | 1.7809    | 0.0000 | 2.8228 | 0.0000 | 3.8051 | 0.0000 | 1.4471 | 0 |
| 1872 | 160.1 | 0.6623 | 0.4725 | 14.1293 | 3.5154 | 0.0000 | 2.3434 | 0.0000 | 3.5271 | 0.0000 | 2.3827 | 0.0000 | 1.7809    | 0.0000 | 2.8228 | 0.0000 | 3.8050 | 0.0000 | 1.4471 | 0 |
| 1873 | 160.1 | 0.6620 | 0.4728 | 14.1376 | 3.5153 | 0.0000 | 2.3433 | 0.0000 | 3.5270 | 0.0000 | 2.3827 | 0.0000 | 1.7809    | 0.0000 | 2.8229 | 0.0000 | 3.8050 | 0.0000 | 1.4471 | 0 |
| 1874 | 160   | 0.6616 | 0.4731 | 14.1460 | 3.5153 | 0.0000 | 2.3433 | 0.0000 | 3.5270 | 0.0000 | 2.3827 | 0.0000 | 1.7809    | 0.0000 | 2.8229 | 0.0000 | 3.8049 | 0.0000 | 1.4471 | 0 |
| 1875 | 159.9 | 0.6612 | 0.4734 | 14.1543 | 3.5152 | 0.0000 | 2.3433 | 0.0000 | 3.5270 | 0.0000 | 2.3827 | 0.0000 | 1.7809    | 0.0000 | 2.8230 | 0.0000 | 3.8049 | 0.0000 | 1.4471 | 0 |
| 1876 | 159.8 | 0.6609 | 0.4737 | 14.1627 | 3.5152 | 0.0000 | 2.3433 | 0.0000 | 3.5270 | 0.0000 | 2.3827 | 0.0000 | 1.7808    | 0.0000 | 2.8231 | 0.0000 | 3.8048 | 0.0000 | 1.4471 | 0 |
| 1877 | 159.7 | 0.6605 | 0.4740 | 14.1711 | 3.5151 | 0.0000 | 2.3433 | 0.0000 | 3.5270 | 0.0000 | 2.3827 | 0.0000 | 1.7808    | 0.0000 | 2.8231 | 0.0000 | 3.8048 | 0.0000 | 1.4471 | 0 |
| 1878 | 159.6 | 0.6602 | 0.4743 | 14.1794 | 3.5151 | 0.0000 | 2.3433 | 0.0000 | 3.5270 | 0.0000 | 2.3827 | 0.0000 | 1.7808    | 0.0000 | 2.8232 | 0.0000 | 3.8047 | 0.0000 | 1.4471 | 0 |
| 1879 | 159.5 | 0.6598 | 0.4746 | 14.1878 | 3.5151 | 0.0000 | 2.3432 | 0.0000 | 3.5269 | 0.0000 | 2.3826 | 0.0000 | 1.7808    | 0.0000 | 2.8233 | 0.0000 | 3.8047 | 0.0000 | 1.4471 | 0 |
| 1880 | 159.5 | 0.6595 | 0.4749 | 14.1961 | 3.5150 | 0.0000 | 2.3432 | 0.0000 | 3.5269 | 0.0000 | 2.3826 | 0.0000 | 1.7808    | 0.0000 | 2.8233 | 0.0000 | 3.8046 | 0.0000 | 1.4471 | 0 |
| 1881 | 159.4 | 0.6591 | 0.4752 | 14.2045 | 3.5150 | 0.0000 | 2.3432 | 0.0000 | 3.5269 | 0.0000 | 2.3826 | 0.0000 | 1.7808    | 0.0000 | 2.8234 | 0.0000 | 3.8046 | 0.0000 | 1.4471 | 0 |
| 1882 | 159.3 | 0.6588 | 0.4755 | 14.2129 | 3.5149 | 0.0000 | 2.3432 | 0.0000 | 3.5269 | 0.0000 | 2.3826 | 0.0000 | 1.7808    | 0.0000 | 2.8235 | 0.0000 | 3.8045 | 0.0000 | 1.4471 | 0 |
| 1883 | 159.2 | 0.6584 | 0.4758 | 14.2212 | 3.5149 | 0.0000 | 2.3432 | 0.0000 | 3.5269 | 0.0000 | 2.3826 | 0.0000 | 1.7808    | 0.0000 | 2.8235 | 0.0000 | 3.8045 | 0.0000 | 1.4471 | 0 |
| 1884 | 159.1 | 0.6581 | 0.4761 | 14.2296 | 3.5149 | 0.0000 | 2.3432 | 0.0000 | 3.5269 | 0.0000 | 2.3826 | 0.0000 | 1.7807    | 0.0000 | 2.8236 | 0.0000 | 3.8044 | 0.0000 | 1.4471 | 0 |
| 1885 | 159   | 0.6577 | 0.4764 | 14.2380 | 3.5148 | 0.0000 | 2.3431 | 0.0000 | 3.5268 | 0.0000 | 2.3826 | 0.0000 | 1.7807    | 0.0000 | 2.8236 | 0.0000 | 3.8044 | 0.0000 | 1.4471 | 0 |
| 1886 | 159   | 0.6574 | 0.4767 | 14.2463 | 3.5148 | 0.0000 | 2.3431 | 0.0000 | 3.5268 | 0.0000 | 2.3826 | 0.0000 | 1.7807    | 0.0000 | 2.8237 | 0.0000 | 3.8043 | 0.0000 | 1.4471 | 0 |
| 1887 | 158.9 | 0.6570 | 0.4770 | 14.2547 | 3.5147 | 0.0000 | 2.3431 | 0.0000 | 3.5268 | 0.0000 | 2.3825 | 0.0000 | 1.7807    | 0.0000 | 2.8238 | 0.0000 | 3.8043 | 0.0000 | 1.4471 | 0 |
| 1888 | 158.8 | 0.6567 | 0.4773 | 14.2631 | 3.5147 | 0.0000 | 2.3431 | 0.0000 | 3.5268 | 0.0000 | 2.3825 | 0.0000 | 1.7807    | 0.0000 | 2.8238 | 0.0000 | 3.8042 | 0.0000 | 1.4471 | 0 |
| 1889 | 158.7 | 0.6563 | 0.4776 | 14.2714 | 3.5146 | 0.0000 | 2.3431 | 0.0000 | 3.5268 | 0.0000 | 2.3825 | 0.0000 | 1.7807    | 0.0000 | 2.8239 | 0.0000 | 3.8042 | 0.0000 | 1.4471 | 0 |
| 1890 | 158.6 | 0.6560 | 0.4779 | 14.2798 | 3.5146 | 0.0000 | 2.3431 | 0.0000 | 3.5268 | 0.0000 | 2.3825 | 0.0000 | 1.7807    | 0.0000 | 2.8240 | 0.0000 | 3.8041 | 0.0000 | 1.4471 | 0 |
| 1891 | 158.5 | 0.6557 | 0.4782 | 14.2882 | 3.5146 | 0.0000 | 2.3430 | 0.0000 | 3.5267 | 0.0000 | 2.3825 | 0.0000 | 1.7807    | 0.0000 | 2.8240 | 0.0000 | 3.8041 | 0.0000 | 1.4471 | 0 |
| 1892 | 158.5 | 0.6553 | 0.4785 | 14.2965 | 3.5145 | 0.0000 | 2.3430 | 0.0000 | 3.5267 | 0.0000 | 2.3825 | 0.0000 | 1.7806    | 0.0000 | 2.8241 | 0.0000 | 3.8040 | 0.0000 | 1.4471 | 0 |
| 1893 | 158.4 | 0.6550 | 0.4788 | 14.3049 | 3.5145 | 0.0000 | 2.3430 | 0.0000 | 3.5267 | 0.0000 | 2.3825 | 0.0000 | 1.7806    | 0.0000 | 2.8242 | 0.0000 | 3.8040 | 0.0000 | 1.4471 | 0 |
| 1894 | 158.3 | 0.6546 | 0.4791 | 14.3133 | 3.5144 | 0.0000 | 2.3430 | 0.0000 | 3.5267 | 0.0000 | 2.3825 | 0.0000 | 1.7806    | 0.0000 | 2.8242 | 0.0000 | 3.8039 | 0.0000 | 1.4471 | 0 |
| 1895 | 158.2 | 0.6543 | 0.4795 | 14.3217 | 3.5144 | 0.0000 | 2.3430 | 0.0000 | 3.5267 | 0.0000 | 2.3824 | 0.0000 | 1.7806    | 0.0000 | 2.8243 | 0.0000 | 3.8039 | 0.0000 | 1.4471 | 0 |

| nm   | THz   | eV     | Ag     |         | cSi    |        | Fe2O3  |        | GaAs   |        | TiO2   |        | P3HT:PCBM |        | CdTe   |        | aSi    |        | SiO2   |   |
|------|-------|--------|--------|---------|--------|--------|--------|--------|--------|--------|--------|--------|-----------|--------|--------|--------|--------|--------|--------|---|
|      |       |        | n      | k       | n      | k      | n      | k      | n      | k      | n      | k      | n         | k      | n      | k      | n      | k      | n      | k |
| 1896 | 158.1 | 0.6539 | 0.4798 | 14.3301 | 3.5144 | 0.0000 | 2.3430 | 0.0000 | 3.5267 | 0.0000 | 2.3824 | 0.0000 | 1.7806    | 0.0000 | 2.8243 | 0.0000 | 3.8038 | 0.0000 | 1.4471 | 0 |
| 1897 | 158   | 0.6536 | 0.4801 | 14.3384 | 3.5143 | 0.0000 | 2.3429 | 0.0000 | 3.5266 | 0.0000 | 2.3824 | 0.0000 | 1.7806    | 0.0000 | 2.8244 | 0.0000 | 3.8038 | 0.0000 | 1.4471 | 0 |
| 1898 | 158   | 0.6532 | 0.4804 | 14.3468 | 3.5143 | 0.0000 | 2.3429 | 0.0000 | 3.5266 | 0.0000 | 2.3824 | 0.0000 | 1.7806    | 0.0000 | 2.8245 | 0.0000 | 3.8037 | 0.0000 | 1.4471 | 0 |
| 1899 | 157.9 | 0.6529 | 0.4807 | 14.3552 | 3.5142 | 0.0000 | 2.3429 | 0.0000 | 3.5266 | 0.0000 | 2.3824 | 0.0000 | 1.7806    | 0.0000 | 2.8245 | 0.0000 | 3.8037 | 0.0000 | 1.4471 | 0 |
| 1900 | 157.8 | 0.6525 | 0.4810 | 14.3636 | 3.5142 | 0.0000 | 2.3429 | 0.0000 | 3.5266 | 0.0000 | 2.3824 | 0.0000 | 1.7805    | 0.0000 | 2.8246 | 0.0000 | 3.8036 | 0.0000 | 1.4471 | 0 |
| 1901 | 157.7 | 0.6522 | 0.4813 | 14.3720 | 3.5142 | 0.0000 | 2.3429 | 0.0000 | 3.5266 | 0.0000 | 2.3824 | 0.0000 | 1.7805    | 0.0000 | 2.8247 | 0.0000 | 3.8036 | 0.0000 | 1.4471 | 0 |
| 1902 | 157.6 | 0.6519 | 0.4816 | 14.3804 | 3.5141 | 0.0000 | 2.3429 | 0.0000 | 3.5266 | 0.0000 | 2.3824 | 0.0000 | 1.7805    | 0.0000 | 2.8247 | 0.0000 | 3.8036 | 0.0000 | 1.4471 | 0 |
| 1903 | 157.5 | 0.6515 | 0.4819 | 14.3887 | 3.5141 | 0.0000 | 2.3428 | 0.0000 | 3.5265 | 0.0000 | 2.3823 | 0.0000 | 1.7805    | 0.0000 | 2.8248 | 0.0000 | 3.8035 | 0.0000 | 1.4471 | 0 |
| 1904 | 157.5 | 0.6512 | 0.4822 | 14.3971 | 3.5140 | 0.0000 | 2.3428 | 0.0000 | 3.5265 | 0.0000 | 2.3823 | 0.0000 | 1.7805    | 0.0000 | 2.8249 | 0.0000 | 3.8035 | 0.0000 | 1.4471 | 0 |
| 1905 | 157.4 | 0.6508 | 0.4825 | 14.4055 | 3.5140 | 0.0000 | 2.3428 | 0.0000 | 3.5265 | 0.0000 | 2.3823 | 0.0000 | 1.7805    | 0.0000 | 2.8249 | 0.0000 | 3.8034 | 0.0000 | 1.4471 | 0 |
| 1906 | 157.3 | 0.6505 | 0.4828 | 14.4139 | 3.5140 | 0.0000 | 2.3428 | 0.0000 | 3.5265 | 0.0000 | 2.3823 | 0.0000 | 1.7805    | 0.0000 | 2.8250 | 0.0000 | 3.8034 | 0.0000 | 1.4471 | 0 |
| 1907 | 157.2 | 0.6502 | 0.4831 | 14.4223 | 3.5139 | 0.0000 | 2.3428 | 0.0000 | 3.5265 | 0.0000 | 2.3823 | 0.0000 | 1.7805    | 0.0000 | 2.8251 | 0.0000 | 3.8033 | 0.0000 | 1.4471 | 0 |
| 1908 | 157.1 | 0.6498 | 0.4834 | 14.4307 | 3.5139 | 0.0000 | 2.3428 | 0.0000 | 3.5265 | 0.0000 | 2.3823 | 0.0000 | 1.7805    | 0.0000 | 2.8251 | 0.0000 | 3.8033 | 0.0000 | 1.4471 | 0 |
| 1909 | 157   | 0.6495 | 0.4837 | 14.4391 | 3.5138 | 0.0000 | 2.3427 | 0.0000 | 3.5264 | 0.0000 | 2.3823 | 0.0000 | 1.7804    | 0.0000 | 2.8252 | 0.0000 | 3.8032 | 0.0000 | 1.4471 | 0 |
| 1910 | 157   | 0.6491 | 0.4841 | 14.4475 | 3.5138 | 0.0000 | 2.3427 | 0.0000 | 3.5264 | 0.0000 | 2.3823 | 0.0000 | 1.7804    | 0.0000 | 2.8253 | 0.0000 | 3.8032 | 0.0000 | 1.4471 | 0 |
| 1911 | 156.9 | 0.6488 | 0.4844 | 14.4559 | 3.5138 | 0.0000 | 2.3427 | 0.0000 | 3.5264 | 0.0000 | 2.3822 | 0.0000 | 1.7804    | 0.0000 | 2.8253 | 0.0000 | 3.8031 | 0.0000 | 1.4471 | 0 |
| 1912 | 156.8 | 0.6485 | 0.4847 | 14.4643 | 3.5137 | 0.0000 | 2.3427 | 0.0000 | 3.5264 | 0.0000 | 2.3822 | 0.0000 | 1.7804    | 0.0000 | 2.8254 | 0.0000 | 3.8031 | 0.0000 | 1.4471 | 0 |
| 1913 | 156.7 | 0.6481 | 0.4850 | 14.4727 | 3.5137 | 0.0000 | 2.3427 | 0.0000 | 3.5264 | 0.0000 | 2.3822 | 0.0000 | 1.7804    | 0.0000 | 2.8254 | 0.0000 | 3.8030 | 0.0000 | 1.4471 | 0 |
| 1914 | 156.6 | 0.6478 | 0.4853 | 14.4811 | 3.5136 | 0.0000 | 2.3427 | 0.0000 | 3.5264 | 0.0000 | 2.3822 | 0.0000 | 1.7804    | 0.0000 | 2.8255 | 0.0000 | 3.8030 | 0.0000 | 1.4471 | 0 |
| 1915 | 156.6 | 0.6474 | 0.4856 | 14.4895 | 3.5136 | 0.0000 | 2.3426 | 0.0000 | 3.5264 | 0.0000 | 2.3822 | 0.0000 | 1.7804    | 0.0000 | 2.8256 | 0.0000 | 3.8029 | 0.0000 | 1.4471 | 0 |
| 1916 | 156.5 | 0.6471 | 0.4859 | 14.4979 | 3.5136 | 0.0000 | 2.3426 | 0.0000 | 3.5263 | 0.0000 | 2.3822 | 0.0000 | 1.7804    | 0.0000 | 2.8256 | 0.0000 | 3.8029 | 0.0000 | 1.4471 | 0 |
| 1917 | 156.4 | 0.6468 | 0.4862 | 14.5063 | 3.5135 | 0.0000 | 2.3426 | 0.0000 | 3.5263 | 0.0000 | 2.3822 | 0.0000 | 1.7803    | 0.0000 | 2.8257 | 0.0000 | 3.8029 | 0.0000 | 1.4471 | 0 |
| 1918 | 156.3 | 0.6464 | 0.4865 | 14.5147 | 3.5135 | 0.0000 | 2.3426 | 0.0000 | 3.5263 | 0.0000 | 2.3822 | 0.0000 | 1.7803    | 0.0000 | 2.8258 | 0.0000 | 3.8028 | 0.0000 | 1.4471 | 0 |
| 1919 | 156.2 | 0.6461 | 0.4868 | 14.5231 | 3.5134 | 0.0000 | 2.3426 | 0.0000 | 3.5263 | 0.0000 | 2.3821 | 0.0000 | 1.7803    | 0.0000 | 2.8258 | 0.0000 | 3.8028 | 0.0000 | 1.4471 | 0 |
| 1920 | 156.1 | 0.6458 | 0.4871 | 14.5315 | 3.5134 | 0.0000 | 2.3426 | 0.0000 | 3.5263 | 0.0000 | 2.3821 | 0.0000 | 1.7803    | 0.0000 | 2.8259 | 0.0000 | 3.8027 | 0.0000 | 1.4471 | 0 |
| 1921 | 156.1 | 0.6454 | 0.4875 | 14.5399 | 3.5134 | 0.0000 | 2.3426 | 0.0000 | 3.5263 | 0.0000 | 2.3821 | 0.0000 | 1.7803    | 0.0000 | 2.8260 | 0.0000 | 3.8027 | 0.0000 | 1.4471 | 0 |
| 1922 | 156   | 0.6451 | 0.4878 | 14.5483 | 3.5133 | 0.0000 | 2.3425 | 0.0000 | 3.5262 | 0.0000 | 2.3821 | 0.0000 | 1.7803    | 0.0000 | 2.8260 | 0.0000 | 3.8026 | 0.0000 | 1.4471 | 0 |
| 1923 | 155.9 | 0.6447 | 0.4881 | 14.5567 | 3.5133 | 0.0000 | 2.3425 | 0.0000 | 3.5262 | 0.0000 | 2.3821 | 0.0000 | 1.7803    | 0.0000 | 2.8261 | 0.0000 | 3.8026 | 0.0000 | 1.4471 | 0 |
| 1924 | 155.8 | 0.6444 | 0.4884 | 14.5651 | 3.5132 | 0.0000 | 2.3425 | 0.0000 | 3.5262 | 0.0000 | 2.3821 | 0.0000 | 1.7803    | 0.0000 | 2.8262 | 0.0000 | 3.8025 | 0.0000 | 1.4471 | 0 |
| 1925 | 155.7 | 0.6441 | 0.4887 | 14.5735 | 3.5132 | 0.0000 | 2.3425 | 0.0000 | 3.5262 | 0.0000 | 2.3821 | 0.0000 | 1.7803    | 0.0000 | 2.8262 | 0.0000 | 3.8025 | 0.0000 | 1.4471 | 0 |
| 1926 | 155.7 | 0.6437 | 0.4890 | 14.5819 | 3.5132 | 0.0000 | 2.3425 | 0.0000 | 3.5262 | 0.0000 | 2.3821 | 0.0000 | 1.7802    | 0.0000 | 2.8263 | 0.0000 | 3.8024 | 0.0000 | 1.4471 | 0 |
| 1927 | 155.6 | 0.6434 | 0.4893 | 14.5904 | 3.5131 | 0.0000 | 2.3425 | 0.0000 | 3.5262 | 0.0000 | 2.3821 | 0.0000 | 1.7802    | 0.0000 | 2.8264 | 0.0000 | 3.8024 | 0.0000 | 1.4471 | 0 |

| nm   | THz   | eV     | Ag     |         | cSi    |        | Fe2O3  |        | GaAs   |        | TiO2   |        | P3HT:PCBM |        | CdTe   |        | aSi    |        | SiO2   |   |
|------|-------|--------|--------|---------|--------|--------|--------|--------|--------|--------|--------|--------|-----------|--------|--------|--------|--------|--------|--------|---|
|      |       |        | n      | k       | n      | k      | n      | k      | n      | k      | n      | k      | n         | k      | n      | k      | n      | k      | n      | k |
| 1928 | 155.5 | 0.6431 | 0.4896 | 14.5988 | 3.5131 | 0.0000 | 2.3424 | 0.0000 | 3.5262 | 0.0000 | 2.3820 | 0.0000 | 1.7802    | 0.0000 | 2.8264 | 0.0000 | 3.8024 | 0.0000 | 1.4471 | 0 |
| 1929 | 155.4 | 0.6427 | 0.4900 | 14.6072 | 3.5130 | 0.0000 | 2.3424 | 0.0000 | 3.5261 | 0.0000 | 2.3820 | 0.0000 | 1.7802    | 0.0000 | 2.8265 | 0.0000 | 3.8023 | 0.0000 | 1.4471 | 0 |
| 1930 | 155.3 | 0.6424 | 0.4903 | 14.6156 | 3.5130 | 0.0000 | 2.3424 | 0.0000 | 3.5261 | 0.0000 | 2.3820 | 0.0000 | 1.7802    | 0.0000 | 2.8266 | 0.0000 | 3.8023 | 0.0000 | 1.4471 | 0 |
| 1931 | 155.3 | 0.6421 | 0.4906 | 14.6240 | 3.5130 | 0.0000 | 2.3424 | 0.0000 | 3.5261 | 0.0000 | 2.3820 | 0.0000 | 1.7802    | 0.0000 | 2.8266 | 0.0000 | 3.8022 | 0.0000 | 1.4471 | 0 |
| 1932 | 155.2 | 0.6417 | 0.4909 | 14.6324 | 3.5129 | 0.0000 | 2.3424 | 0.0000 | 3.5261 | 0.0000 | 2.3820 | 0.0000 | 1.7802    | 0.0000 | 2.8267 | 0.0000 | 3.8022 | 0.0000 | 1.4471 | 0 |
| 1933 | 155.1 | 0.6414 | 0.4912 | 14.6409 | 3.5129 | 0.0000 | 2.3424 | 0.0000 | 3.5261 | 0.0000 | 2.3820 | 0.0000 | 1.7802    | 0.0000 | 2.8268 | 0.0000 | 3.8021 | 0.0000 | 1.4471 | 0 |
| 1934 | 155   | 0.6411 | 0.4915 | 14.6493 | 3.5129 | 0.0000 | 2.3424 | 0.0000 | 3.5261 | 0.0000 | 2.3820 | 0.0000 | 1.7802    | 0.0000 | 2.8268 | 0.0000 | 3.8021 | 0.0000 | 1.4471 | 0 |
| 1935 | 154.9 | 0.6407 | 0.4918 | 14.6577 | 3.5128 | 0.0000 | 2.3423 | 0.0000 | 3.5260 | 0.0000 | 2.3820 | 0.0000 | 1.7801    | 0.0000 | 2.8269 | 0.0000 | 3.8020 | 0.0000 | 1.4471 | 0 |
| 1936 | 154.9 | 0.6404 | 0.4922 | 14.6661 | 3.5128 | 0.0000 | 2.3423 | 0.0000 | 3.5260 | 0.0000 | 2.3819 | 0.0000 | 1.7801    | 0.0000 | 2.8270 | 0.0000 | 3.8020 | 0.0000 | 1.4471 | 0 |
| 1937 | 154.8 | 0.6401 | 0.4925 | 14.6746 | 3.5127 | 0.0000 | 2.3423 | 0.0000 | 3.5260 | 0.0000 | 2.3819 | 0.0000 | 1.7801    | 0.0000 | 2.8270 | 0.0000 | 3.8020 | 0.0000 | 1.4471 | 0 |
| 1938 | 154.7 | 0.6398 | 0.4928 | 14.6830 | 3.5127 | 0.0000 | 2.3423 | 0.0000 | 3.5260 | 0.0000 | 2.3819 | 0.0000 | 1.7801    | 0.0000 | 2.8271 | 0.0000 | 3.8019 | 0.0000 | 1.4471 | 0 |
| 1939 | 154.6 | 0.6394 | 0.4931 | 14.6914 | 3.5127 | 0.0000 | 2.3423 | 0.0000 | 3.5260 | 0.0000 | 2.3819 | 0.0000 | 1.7801    | 0.0000 | 2.8272 | 0.0000 | 3.8019 | 0.0000 | 1.4471 | 0 |
| 1940 | 154.5 | 0.6391 | 0.4934 | 14.6998 | 3.5126 | 0.0000 | 2.3423 | 0.0000 | 3.5260 | 0.0000 | 2.3819 | 0.0000 | 1.7801    | 0.0000 | 2.8272 | 0.0000 | 3.8018 | 0.0000 | 1.4471 | 0 |
| 1941 | 154.5 | 0.6388 | 0.4937 | 14.7083 | 3.5126 | 0.0000 | 2.3422 | 0.0000 | 3.5260 | 0.0000 | 2.3819 | 0.0000 | 1.7801    | 0.0000 | 2.8273 | 0.0000 | 3.8018 | 0.0000 | 1.4471 | 0 |
| 1942 | 154.4 | 0.6384 | 0.4940 | 14.7167 | 3.5125 | 0.0000 | 2.3422 | 0.0000 | 3.5259 | 0.0000 | 2.3819 | 0.0000 | 1.7801    | 0.0000 | 2.8274 | 0.0000 | 3.8017 | 0.0000 | 1.4471 | 0 |
| 1943 | 154.3 | 0.6381 | 0.4944 | 14.7251 | 3.5125 | 0.0000 | 2.3422 | 0.0000 | 3.5259 | 0.0000 | 2.3819 | 0.0000 | 1.7801    | 0.0000 | 2.8274 | 0.0000 | 3.8017 | 0.0000 | 1.4471 | 0 |
| 1944 | 154.2 | 0.6378 | 0.4947 | 14.7336 | 3.5125 | 0.0000 | 2.3422 | 0.0000 | 3.5259 | 0.0000 | 2.3819 | 0.0000 | 1.7800    | 0.0000 | 2.8275 | 0.0000 | 3.8017 | 0.0000 | 1.4471 | 0 |
| 1945 | 154.1 | 0.6375 | 0.4950 | 14.7420 | 3.5124 | 0.0000 | 2.3422 | 0.0000 | 3.5259 | 0.0000 | 2.3818 | 0.0000 | 1.7800    | 0.0000 | 2.8276 | 0.0000 | 3.8016 | 0.0000 | 1.4471 | 0 |
| 1946 | 154.1 | 0.6371 | 0.4953 | 14.7505 | 3.5124 | 0.0000 | 2.3422 | 0.0000 | 3.5259 | 0.0000 | 2.3818 | 0.0000 | 1.7800    | 0.0000 | 2.8276 | 0.0000 | 3.8016 | 0.0000 | 1.4471 | 0 |
| 1947 | 154   | 0.6368 | 0.4956 | 14.7589 | 3.5124 | 0.0000 | 2.3422 | 0.0000 | 3.5259 | 0.0000 | 2.3818 | 0.0000 | 1.7800    | 0.0000 | 2.8277 | 0.0000 | 3.8015 | 0.0000 | 1.4471 | 0 |
| 1948 | 153.9 | 0.6365 | 0.4959 | 14.7673 | 3.5123 | 0.0000 | 2.3421 | 0.0000 | 3.5258 | 0.0000 | 2.3818 | 0.0000 | 1.7800    | 0.0000 | 2.8278 | 0.0000 | 3.8015 | 0.0000 | 1.4471 | 0 |
| 1949 | 153.8 | 0.6361 | 0.4963 | 14.7758 | 3.5123 | 0.0000 | 2.3421 | 0.0000 | 3.5258 | 0.0000 | 2.3818 | 0.0000 | 1.7800    | 0.0000 | 2.8278 | 0.0000 | 3.8014 | 0.0000 | 1.4471 | 0 |
| 1950 | 153.7 | 0.6358 | 0.4966 | 14.7842 | 3.5122 | 0.0000 | 2.3421 | 0.0000 | 3.5258 | 0.0000 | 2.3818 | 0.0000 | 1.7800    | 0.0000 | 2.8279 | 0.0000 | 3.8014 | 0.0000 | 1.4471 | 0 |
| 1951 | 153.7 | 0.6355 | 0.4969 | 14.7927 | 3.5122 | 0.0000 | 2.3421 | 0.0000 | 3.5258 | 0.0000 | 2.3818 | 0.0000 | 1.7800    | 0.0000 | 2.8280 | 0.0000 | 3.8013 | 0.0000 | 1.4471 | 0 |
| 1952 | 153.6 | 0.6352 | 0.4972 | 14.8011 | 3.5122 | 0.0000 | 2.3421 | 0.0000 | 3.5258 | 0.0000 | 2.3818 | 0.0000 | 1.7800    | 0.0000 | 2.8280 | 0.0000 | 3.8013 | 0.0000 | 1.4471 | 0 |
| 1953 | 153.5 | 0.6348 | 0.4975 | 14.8095 | 3.5121 | 0.0000 | 2.3421 | 0.0000 | 3.5258 | 0.0000 | 2.3817 | 0.0000 | 1.7799    | 0.0000 | 2.8281 | 0.0000 | 3.8013 | 0.0000 | 1.4471 | 0 |
| 1954 | 153.4 | 0.6345 | 0.4979 | 14.8180 | 3.5121 | 0.0000 | 2.3421 | 0.0000 | 3.5258 | 0.0000 | 2.3817 | 0.0000 | 1.7799    | 0.0000 | 2.8282 | 0.0000 | 3.8012 | 0.0000 | 1.4471 | 0 |
| 1955 | 153.3 | 0.6342 | 0.4982 | 14.8264 | 3.5121 | 0.0000 | 2.3420 | 0.0000 | 3.5257 | 0.0000 | 2.3817 | 0.0000 | 1.7799    | 0.0000 | 2.8283 | 0.0000 | 3.8012 | 0.0000 | 1.4471 | 0 |
| 1956 | 153.3 | 0.6339 | 0.4985 | 14.8349 | 3.5120 | 0.0000 | 2.3420 | 0.0000 | 3.5257 | 0.0000 | 2.3817 | 0.0000 | 1.7799    | 0.0000 | 2.8283 | 0.0000 | 3.8011 | 0.0000 | 1.4471 | 0 |
| 1957 | 153.2 | 0.6335 | 0.4988 | 14.8433 | 3.5120 | 0.0000 | 2.3420 | 0.0000 | 3.5257 | 0.0000 | 2.3817 | 0.0000 | 1.7799    | 0.0000 | 2.8284 | 0.0000 | 3.8011 | 0.0000 | 1.4471 | 0 |
| 1958 | 153.1 | 0.6332 | 0.4991 | 14.8518 | 3.5119 | 0.0000 | 2.3420 | 0.0000 | 3.5257 | 0.0000 | 2.3817 | 0.0000 | 1.7799    | 0.0000 | 2.8285 | 0.0000 | 3.8010 | 0.0000 | 1.4471 | 0 |
| 1959 | 153   | 0.6329 | 0.4995 | 14.8602 | 3.5119 | 0.0000 | 2.3420 | 0.0000 | 3.5257 | 0.0000 | 2.3817 | 0.0000 | 1.7799    | 0.0000 | 2.8285 | 0.0000 | 3.8010 | 0.0000 | 1.4471 | 0 |

| nm   | THz   | eV     | Ag     |         | cSi    |        | Fe2O3  |        | GaAs   |        | TiO2   |        | P3HT:PCBM |        | CdTe   |        | aSi    |        | SiO2   |   |
|------|-------|--------|--------|---------|--------|--------|--------|--------|--------|--------|--------|--------|-----------|--------|--------|--------|--------|--------|--------|---|
|      |       |        | n      | k       | n      | k      | n      | k      | n      | k      | n      | k      | n         | k      | n      | k      | n      | k      | n      | k |
| 1960 | 153   | 0.6326 | 0.4998 | 14.8687 | 3.5119 | 0.0000 | 2.3420 | 0.0000 | 3.5257 | 0.0000 | 2.3817 | 0.0000 | 1.7799    | 0.0000 | 2.8286 | 0.0000 | 3.8010 | 0.0000 | 1.4471 | 0 |
| 1961 | 152.9 | 0.6322 | 0.5001 | 14.8771 | 3.5118 | 0.0000 | 2.3419 | 0.0000 | 3.5257 | 0.0000 | 2.3817 | 0.0000 | 1.7799    | 0.0000 | 2.8287 | 0.0000 | 3.8009 | 0.0000 | 1.4471 | 0 |
| 1962 | 152.8 | 0.6319 | 0.5004 | 14.8856 | 3.5118 | 0.0000 | 2.3419 | 0.0000 | 3.5256 | 0.0000 | 2.3816 | 0.0000 | 1.7798    | 0.0000 | 2.8287 | 0.0000 | 3.8009 | 0.0000 | 1.4471 | 0 |
| 1963 | 152.7 | 0.6316 | 0.5007 | 14.8941 | 3.5118 | 0.0000 | 2.3419 | 0.0000 | 3.5256 | 0.0000 | 2.3816 | 0.0000 | 1.7798    | 0.0000 | 2.8288 | 0.0000 | 3.8008 | 0.0000 | 1.4471 | 0 |
| 1964 | 152.6 | 0.6313 | 0.5011 | 14.9025 | 3.5117 | 0.0000 | 2.3419 | 0.0000 | 3.5256 | 0.0000 | 2.3816 | 0.0000 | 1.7798    | 0.0000 | 2.8289 | 0.0000 | 3.8008 | 0.0000 | 1.4471 | 0 |
| 1965 | 152.6 | 0.6310 | 0.5014 | 14.9110 | 3.5117 | 0.0000 | 2.3419 | 0.0000 | 3.5256 | 0.0000 | 2.3816 | 0.0000 | 1.7798    | 0.0000 | 2.8289 | 0.0000 | 3.8008 | 0.0000 | 1.4471 | 0 |
| 1966 | 152.5 | 0.6306 | 0.5017 | 14.9194 | 3.5116 | 0.0000 | 2.3419 | 0.0000 | 3.5256 | 0.0000 | 2.3816 | 0.0000 | 1.7798    | 0.0000 | 2.8290 | 0.0000 | 3.8007 | 0.0000 | 1.4470 | 0 |
| 1967 | 152.4 | 0.6303 | 0.5020 | 14.9279 | 3.5116 | 0.0000 | 2.3419 | 0.0000 | 3.5256 | 0.0000 | 2.3816 | 0.0000 | 1.7798    | 0.0000 | 2.8291 | 0.0000 | 3.8007 | 0.0000 | 1.4470 | 0 |
| 1968 | 152.3 | 0.6300 | 0.5024 | 14.9364 | 3.5116 | 0.0000 | 2.3418 | 0.0000 | 3.5256 | 0.0000 | 2.3816 | 0.0000 | 1.7798    | 0.0000 | 2.8291 | 0.0000 | 3.8006 | 0.0000 | 1.4470 | 0 |
| 1969 | 152.3 | 0.6297 | 0.5027 | 14.9448 | 3.5115 | 0.0000 | 2.3418 | 0.0000 | 3.5255 | 0.0000 | 2.3816 | 0.0000 | 1.7798    | 0.0000 | 2.8292 | 0.0000 | 3.8006 | 0.0000 | 1.4470 | 0 |
| 1970 | 152.2 | 0.6294 | 0.5030 | 14.9533 | 3.5115 | 0.0000 | 2.3418 | 0.0000 | 3.5255 | 0.0000 | 2.3816 | 0.0000 | 1.7798    | 0.0000 | 2.8293 | 0.0000 | 3.8005 | 0.0000 | 1.4470 | 0 |
| 1971 | 152.1 | 0.6290 | 0.5033 | 14.9618 | 3.5115 | 0.0000 | 2.3418 | 0.0000 | 3.5255 | 0.0000 | 2.3815 | 0.0000 | 1.7798    | 0.0000 | 2.8293 | 0.0000 | 3.8005 | 0.0000 | 1.4470 | 0 |
| 1972 | 152   | 0.6287 | 0.5036 | 14.9702 | 3.5114 | 0.0000 | 2.3418 | 0.0000 | 3.5255 | 0.0000 | 2.3815 | 0.0000 | 1.7797    | 0.0000 | 2.8294 | 0.0000 | 3.8005 | 0.0000 | 1.4470 | 0 |
| 1973 | 151.9 | 0.6284 | 0.5040 | 14.9787 | 3.5114 | 0.0000 | 2.3418 | 0.0000 | 3.5255 | 0.0000 | 2.3815 | 0.0000 | 1.7797    | 0.0000 | 2.8295 | 0.0000 | 3.8004 | 0.0000 | 1.4470 | 0 |
| 1974 | 151.9 | 0.6281 | 0.5043 | 14.9872 | 3.5114 | 0.0000 | 2.3418 | 0.0000 | 3.5255 | 0.0000 | 2.3815 | 0.0000 | 1.7797    | 0.0000 | 2.8296 | 0.0000 | 3.8004 | 0.0000 | 1.4470 | 0 |
| 1975 | 151.8 | 0.6278 | 0.5046 | 14.9956 | 3.5113 | 0.0000 | 2.3417 | 0.0000 | 3.5255 | 0.0000 | 2.3815 | 0.0000 | 1.7797    | 0.0000 | 2.8296 | 0.0000 | 3.8003 | 0.0000 | 1.4470 | 0 |
| 1976 | 151.7 | 0.6275 | 0.5049 | 15.0041 | 3.5113 | 0.0000 | 2.3417 | 0.0000 | 3.5254 | 0.0000 | 2.3815 | 0.0000 | 1.7797    | 0.0000 | 2.8297 | 0.0000 | 3.8003 | 0.0000 | 1.4470 | 0 |
| 1977 | 151.6 | 0.6271 | 0.5053 | 15.0126 | 3.5112 | 0.0000 | 2.3417 | 0.0000 | 3.5254 | 0.0000 | 2.3815 | 0.0000 | 1.7797    | 0.0000 | 2.8298 | 0.0000 | 3.8003 | 0.0000 | 1.4470 | 0 |
| 1978 | 151.6 | 0.6268 | 0.5056 | 15.0211 | 3.5112 | 0.0000 | 2.3417 | 0.0000 | 3.5254 | 0.0000 | 2.3815 | 0.0000 | 1.7797    | 0.0000 | 2.8298 | 0.0000 | 3.8002 | 0.0000 | 1.4470 | 0 |
| 1979 | 151.5 | 0.6265 | 0.5059 | 15.0295 | 3.5112 | 0.0000 | 2.3417 | 0.0000 | 3.5254 | 0.0000 | 2.3815 | 0.0000 | 1.7797    | 0.0000 | 2.8299 | 0.0000 | 3.8002 | 0.0000 | 1.4470 | 0 |
| 1980 | 151.4 | 0.6262 | 0.5062 | 15.0380 | 3.5111 | 0.0000 | 2.3417 | 0.0000 | 3.5254 | 0.0000 | 2.3814 | 0.0000 | 1.7797    | 0.0000 | 2.8300 | 0.0000 | 3.8001 | 0.0000 | 1.4470 | 0 |
| 1981 | 151.3 | 0.6259 | 0.5066 | 15.0465 | 3.5111 | 0.0000 | 2.3417 | 0.0000 | 3.5254 | 0.0000 | 2.3814 | 0.0000 | 1.7796    | 0.0000 | 2.8300 | 0.0000 | 3.8001 | 0.0000 | 1.4470 | 0 |
| 1982 | 151.3 | 0.6256 | 0.5069 | 15.0550 | 3.5111 | 0.0000 | 2.3416 | 0.0000 | 3.5254 | 0.0000 | 2.3814 | 0.0000 | 1.7796    | 0.0000 | 2.8301 | 0.0000 | 3.8001 | 0.0000 | 1.4470 | 0 |
| 1983 | 151.2 | 0.6252 | 0.5072 | 15.0635 | 3.5110 | 0.0000 | 2.3416 | 0.0000 | 3.5253 | 0.0000 | 2.3814 | 0.0000 | 1.7796    | 0.0000 | 2.8302 | 0.0000 | 3.8000 | 0.0000 | 1.4470 | 0 |
| 1984 | 151.1 | 0.6249 | 0.5075 | 15.0719 | 3.5110 | 0.0000 | 2.3416 | 0.0000 | 3.5253 | 0.0000 | 2.3814 | 0.0000 | 1.7796    | 0.0000 | 2.8302 | 0.0000 | 3.8000 | 0.0000 | 1.4470 | 0 |
| 1985 | 151   | 0.6246 | 0.5079 | 15.0804 | 3.5110 | 0.0000 | 2.3416 | 0.0000 | 3.5253 | 0.0000 | 2.3814 | 0.0000 | 1.7796    | 0.0000 | 2.8303 | 0.0000 | 3.7999 | 0.0000 | 1.4470 | 0 |
| 1986 | 151   | 0.6243 | 0.5082 | 15.0889 | 3.5109 | 0.0000 | 2.3416 | 0.0000 | 3.5253 | 0.0000 | 2.3814 | 0.0000 | 1.7796    | 0.0000 | 2.8304 | 0.0000 | 3.7999 | 0.0000 | 1.4470 | 0 |
| 1987 | 150.9 | 0.6240 | 0.5085 | 15.0974 | 3.5109 | 0.0000 | 2.3416 | 0.0000 | 3.5253 | 0.0000 | 2.3814 | 0.0000 | 1.7796    | 0.0000 | 2.8305 | 0.0000 | 3.7998 | 0.0000 | 1.4470 | 0 |
| 1988 | 150.8 | 0.6237 | 0.5089 | 15.1059 | 3.5109 | 0.0000 | 2.3416 | 0.0000 | 3.5253 | 0.0000 | 2.3814 | 0.0000 | 1.7796    | 0.0000 | 2.8305 | 0.0000 | 3.7998 | 0.0000 | 1.4470 | 0 |
| 1989 | 150.7 | 0.6233 | 0.5092 | 15.1144 | 3.5108 | 0.0000 | 2.3416 | 0.0000 | 3.5253 | 0.0000 | 2.3813 | 0.0000 | 1.7796    | 0.0000 | 2.8306 | 0.0000 | 3.7998 | 0.0000 | 1.4470 | 0 |
| 1990 | 150.6 | 0.6230 | 0.5095 | 15.1229 | 3.5108 | 0.0000 | 2.3415 | 0.0000 | 3.5252 | 0.0000 | 2.3813 | 0.0000 | 1.7796    | 0.0000 | 2.8307 | 0.0000 | 3.7997 | 0.0000 | 1.4470 | 0 |
| 1991 | 150.6 | 0.6227 | 0.5098 | 15.1314 | 3.5108 | 0.0000 | 2.3415 | 0.0000 | 3.5252 | 0.0000 | 2.3813 | 0.0000 | 1.7795    | 0.0000 | 2.8307 | 0.0000 | 3.7997 | 0.0000 | 1.4470 | 0 |



|      |       |        | Ag     |         | cSi    |        | Fe2O3  |        | GaAs   |        | TiO2   |        | P3HT:PCBM |        | CdTe   |        | aSi    |        | SiO2   |   |
|------|-------|--------|--------|---------|--------|--------|--------|--------|--------|--------|--------|--------|-----------|--------|--------|--------|--------|--------|--------|---|
| nm   | THz   | eV     | n      | k       | n      | k      | n      | k      | n      | k      | n      | k      | n         | k      | n      | k      | n      | k      | n      | k |
| 1992 | 150.5 | 0.6224 | 0.5102 | 15.1398 | 3.5107 | 0.0000 | 2.3415 | 0.0000 | 3.5252 | 0.0000 | 2.3813 | 0.0000 | 1.7795    | 0.0000 | 2.8308 | 0.0000 | 3.7996 | 0.0000 | 1.4470 | 0 |
| 1993 | 150.4 | 0.6221 | 0.5105 | 15.1483 | 3.5107 | 0.0000 | 2.3415 | 0.0000 | 3.5252 | 0.0000 | 2.3813 | 0.0000 | 1.7795    | 0.0000 | 2.8309 | 0.0000 | 3.7996 | 0.0000 | 1.4470 | 0 |
| 1994 | 150.3 | 0.6218 | 0.5108 | 15.1568 | 3.5106 | 0.0000 | 2.3415 | 0.0000 | 3.5252 | 0.0000 | 2.3813 | 0.0000 | 1.7795    | 0.0000 | 2.8309 | 0.0000 | 3.7996 | 0.0000 | 1.4470 | 0 |
| 1995 | 150.3 | 0.6215 | 0.5112 | 15.1653 | 3.5106 | 0.0000 | 2.3415 | 0.0000 | 3.5252 | 0.0000 | 2.3813 | 0.0000 | 1.7795    | 0.0000 | 2.8310 | 0.0000 | 3.7995 | 0.0000 | 1.4470 | 0 |
| 1996 | 150.2 | 0.6212 | 0.5115 | 15.1738 | 3.5106 | 0.0000 | 2.3415 | 0.0000 | 3.5252 | 0.0000 | 2.3813 | 0.0000 | 1.7795    | 0.0000 | 2.8311 | 0.0000 | 3.7995 | 0.0000 | 1.4470 | 0 |
| 1997 | 150.1 | 0.6209 | 0.5118 | 15.1823 | 3.5105 | 0.0000 | 2.3414 | 0.0000 | 3.5252 | 0.0000 | 2.3813 | 0.0000 | 1.7795    | 0.0000 | 2.8312 | 0.0000 | 3.7994 | 0.0000 | 1.4470 | 0 |
| 1998 | 150   | 0.6205 | 0.5121 | 15.1908 | 3.5105 | 0.0000 | 2.3414 | 0.0000 | 3.5251 | 0.0000 | 2.3813 | 0.0000 | 1.7795    | 0.0000 | 2.8312 | 0.0000 | 3.7994 | 0.0000 | 1.4470 | 0 |
| 1999 | 150   | 0.6202 | 0.5125 | 15.1993 | 3.5105 | 0.0000 | 2.3414 | 0.0000 | 3.5251 | 0.0000 | 2.3812 | 0.0000 | 1.7795    | 0.0000 | 2.8313 | 0.0000 | 3.7994 | 0.0000 | 1.4470 | 0 |
| 2000 | 149.9 | 0.6199 | 0.5128 | 15.2078 | 3.5104 | 0.0000 | 2.3414 | 0.0000 | 3.5251 | 0.0000 | 2.3812 | 0.0000 | 1.7795    | 0.0000 | 2.8314 | 0.0000 | 3.7993 | 0.0000 | 1.4470 | 0 |
